# Supplementary material for: Bidirectional genetic overlap between autism spectrum disorder and cognitive traits
Source: Research Square preprint supplement (doi:10.21203/rs.3.rs-1427702/v1), 2022-04-26
Supplement: Supplementary file 1 [file fa9f784195dcc342d69e236d.xlsx]

## Sheet: Index
Table	Contents
Supplementary Table S1	Loci associated with ASD at condFDR<0.01 given association with INT
Supplementary Table S2	Loci associated with ASD at condFDR<0.01 given association with EDU
Supplementary Table S3	Shared loci between ASD and INT at conjFDR<0.05
Supplementary Table S4	Shared loci between ASD and EDU at conjFDR<0.05
Supplementary Table S5	All candidate SNPs in loci shared between ASD and INT
Supplementary Table S6	All candidate SNPs in loci shared between ASD and EDU
Supplementary Table S7	Gene-mapping of candidate SNPs in loci shared between ASD and INT
Supplementary Table S8	Gene-mapping of candidate SNPs in loci shared between ASD and EDU
Supplementary Table S9	Gene-sets significantly enriched and pathways overrepresented with mapped genes to candidate SNPs jointly associated with ASD and EDU.
Supplementary Table S10	Gene-sets significantly enriched and pathways overrepresented with mapped genes to candidate SNPs jointly associated with ASD and INT.
Supplementary Table S11	Gene-sets significantly enriched and pathways overrepresented with mapped genes to candidate SNPs concordantly associated with ASD and EDU.
Supplementary Table S12	Gene-sets significantly enriched and pathways overrepresented with mapped genes to candidate SNPs discordantly associated with ASD and EDU.
Supplementary Table S13	Gene-sets significantly enriched and pathways overrepresented with mapped genes to candidate SNPs concordantly associated with ASD and INT.
Supplementary Table S14	Gene-sets significantly enriched and pathways overrepresented with mapped genes to candidate SNPs discordantly associated with ASD and INT.
Supplementary Table S15	Bivariate MiXeR Estimates - ASD x cognitive traits

## Sheet: Table S1
Table S1. Distinct genomic loci associated with ASD at condFDR<0.01 given association with INT
The most strongly associated lead SNPs in independent genomic loci are shown after merging regions < 250 KB apart into a single locus. CADD = Combined Annotation-Dependent depletion score, which predict how deleterious the SNP effect is on protein structure/function (higher scores indicate more deleterious); RDB = RegulomeDB scores predict likelihood of regulatory functionality (lower scores indi…
locusnum	CHR	LEAD_SNP	LEAD_BP	MinBP	MaxBP	condFDR	non_effect_allele	effect_allele	ASD_Z	ASD_PVAL	INT_Z	INT_PVAL	nearestGene	dist	func	CADD	RDB	minChrState	commonChrState	posMapFilt	eqtlMapFilt	ciMapFilt	Loci in ASD GWAS
1	1	rs12089599	96586426	96479395	96590987	0.00283094	T	C	4.94868	7.472e-07	3.18974	0.001424	RP11-147C23.1	97989	intergenic	0.417	7	14	15	0	0	0	1 : 96561801
2	5	rs13188074	113801423	113795558	113801423	0.00395924	A	G	4.66803	3.041e-06	3.65498	0.0002572	KCNN2	0	intronic	3.684	7	5	15	1	0	1
3	6	rs2388334	98591622	98547979	98591622	0.00105169	A	G	-4.89085	1.004e-06	-11.2089	3.688e-29	RP11-436D23.1	0	ncRNA_intronic	5.756	7	5	15	0	0	0	6 : 98591622
4	7	rs57328457	71640190	71518404	71781573	0.00704764	T	C	-4.54947	5.378e-06	3.60688	0.0003099	CALN1	0	intronic	2.145	7	5	15	1	1	0	1 : 72729142
5	8	rs7820334	10573702	10571591	10583506	0.00846081	T	C	5.43097	5.605e-08	-0.932071	0.3513	RP1L1	4004	intergenic	0.087	2b	2	14	1	1	0	8 : 10576775
6	8	rs11787216	142615222	142611220	142651709	0.0036165	T	C	-4.70115	2.587e-06	-3.63139	0.0002819	AC138647.1	86384	intergenic	0.567	5	5	15	0	0	1	8 : 142615222
7	17	rs8070942	44208674	43463493	44865603	0.00213305	T	G	4.73598	2.18e-06	-4.83657	1.321e-06	KANSL1	0	intronic	0.428	6	2	5	1	1	1
8	20	rs2224274	14760747	14696882	14898489	0.000318749	C	T	-5.13258	2.858e-07	-4.51691	6.275e-06	MACROD2	0	intronic	4.792	7	5	15	1	0	0	20 : 14836243
9	20	rs6047319	21218345	21065004	21474473	0.000397183	G	A	5.47647	4.339e-08	-2.83735	0.004549	PLK1S1	0	ncRNA_intronic	0.518	7	4	5	0	1	0	20 : 21248116

## Sheet: Table S2
Table S2. Distinct genomic loci associated with ASD at condFDR<0.01 given association with EDU
The most strongly associated lead SNPs in independent genomic loci are shown after merging regions < 250 KB apart into a single locus. CADD = Combined Annotation-Dependent depletion score, which predict how deleterious the SNP effect is on protein structure/function (higher scores indicate more deleterious); RDB = RegulomeDB scores predict likelihood of regulatory functionality (lower scores indi…
locusnum	CHR	LEAD_SNP	LEAD_BP	MinBP	MaxBP	condFDR	non_effect_allele	effect_allele	ASD_Z	ASD_PVAL	EDU_Z	EDU_PVAL	nearestGene	dist	func	CADD	RDB	minChrState	commonChrState	posMapFilt	eqtlMapFilt	ciMapFilt	Loci in ASD GWAS
1	1	rs66512	96511272	96479395	96604986	0.000577741	T	C	5.07901	3.794e-07	6.34119	2.28e-10	RP11-147C23.1	22835	intergenic	0.836		9	15	0	0	0	1 : 96561801
2	3	rs1452075	62481063	62471086	62518227	0.000327642	C	T	-5.19303	2.069e-07	-6.34739	2.19e-10	CADPS	0	intronic	3.345	7	5	15	1	0	0	3 : 62481063
3	5	rs4916723	87854395	87792844	87932809	0.0024406	C	A	4.76125	1.924e-06	-7.0922	1.32e-12	LINC00461	0	ncRNA_intronic	18.19	5	2	15	0	0	1
4	5	rs325485	103995368	103791044	104055261	0.00050045	A	G	5.10811	3.254e-07	-4.20249	2.64e-05	RP11-6N13.1	0	ncRNA_intronic	18.49	3a	5	15	0	0	0	5 : 104012303
5	5	rs13188074	113801423	113795558	113801423	0.00357732	A	G	4.66803	3.041e-06	5.29657	1.18e-07	KCNN2	0	intronic	3.684	7	5	15	1	0	1
6	6	rs2388334	98591622	98547979	98591622	0.00139079	A	G	-4.89085	1.004e-06	-13.1337	2.11e-39	RP11-436D23.1	0	ncRNA_intronic	5.756	7	5	15	0	0	0	6 : 98591622
7	7	rs7783557	71646872	71518404	71781573	0.00481213	C	T	-4.5933	4.363e-06	4.24356	2.2e-05	CALN1	0	intronic	0.314	5	5	15	1	1	0	1 : 72729142
8	8	rs11787216	142615222	142611220	142651709	0.00313833	T	C	-4.70115	2.587e-06	-9.27182	1.83e-20	AC138647.1	86384	intergenic	0.567	5	5	15	0	0	1	8 : 142615222
9	14	rs112635299	94838142	94838142	94844947	0.00299244	T	G	5.1207	3.044e-07	2.89762	0.00376	SERPINA1	4941	intergenic	0.272	5	5	15	1	0	0
10	17	rs55915917	43892784	43463493	44865603	0.00407098	G	T	4.63613	3.55e-06	-8.38835	4.93e-17	CRHR1:RP11-105N13.4	0:0	ncRNA_intronic	0.572	4	5	14	1	1	1
11	20	rs2224274	14760747	14696882	14841737	0.000444072	C	T	-5.13258	2.858e-07	-5.65264	1.58e-08	MACROD2	0	intronic	4.792	7	5	15	1	0	0	20 : 14836243
12	20	rs910805	21248116	21182388	21496229	0.000714634	G	A	5.99451	2.041e-09	-0.408373	0.683	ZNF877P	1012	intergenic	3.289	7	5	15	0	0	0	20 : 21248116

## Sheet: Table S3
Table S3. Distinct genomic loci associated with both ASD and INT at conjFDR<0.05
The most strongly associated lead SNPs in independent genomic loci are shown after merging regions < 250 KB apart into a single locus. Function = functional variant classification based on position in or outside of a gene; CADD = Combined Annotation-Dependent depletion score, which predict how deleterious the SNP effect is on protein structure/function (higher scores indicate more deleterious); R…
locusnum	CHR	LEAD_SNP	LEAD_BP	MinBP	MaxBP	conjFDR	A1	A2	ASD_Z	ASD_PVAL	INT_Z	INT_PVAL	nearestGene	dist	func	CADD	RDB	minChrState	commonChrState	posMapFilt	eqtlMapFilt	ciMapFilt	Loci in ASD GWAS
1	1	rs1620977	72729142	72512988	72729142	0.0429878	A	G	3.84859	0.0001188	8.18259	2.778e-16	NEGR1	0	intronic	2.006	6	5	15	1	1	0	1 : 72729142
2	1	rs161116	96499450	96479395	96590987	0.0380154	A	C	3.90013	9.614e-05	4.09992	4.133e-05	RP11-147C23.1	11013	intergenic	2.855		5	15	0	0	0	1 : 96561801
3	3	rs7625233	16852736	16843737	16879208	0.0418797	G	A	3.85954	0.0001136	-4.87776	1.073e-06	PLCL2	0	intronic	9.089	5	1	15	1	0	0
4	3	rs73073015	49503166	48564209	50239012	0.0199261	A	G	4.13777	3.507e-05	6.27807	3.428e-10	RNA5SP130	1381	intergenic	10.37	4	1	7	1	1	1
5	5	rs73134709	81268499	81261923	81679914	0.0410397	A	G	-3.90107	9.577e-05	-3.85527	0.0001156	ATG10	0	intronic	5.044	4	1	1	1	1	1
6	5	rs4242244	92546237	92488009	92574385	0.0356236	G	T	-3.92592	8.64e-05	-5.48409	4.156e-08	POLD2P1	56897	intergenic	6.806	6	5	15	0	0	0
7	5	rs325507	104012579	103788428	104092531	0.04144	A	C	3.86388	0.0001116	4.14731	3.364e-05	RP11-6N13.1	0	ncRNA_intronic	2.274	5	9	15	0	0	0	5 : 104012303
8	5	rs414517	113890971	113837198	113995764	0.0155177	A	C	-4.23329	2.303e-05	-4.2452	2.184e-05	RP11-492A10.1	0	ncRNA_intronic	0.663	7	9	15	0	0	0
9	6	rs2388334	98591622	98547979	98591622	0.00105169	A	G	-4.89085	1.004e-06	-11.2089	3.688e-29	RP11-436D23.1	0	ncRNA_intronic	5.756	7	5	15	0	0	0	6 : 98591622
10	7	rs7794285	104849737	104611876	105040962	0.0333634	A	G	3.95228	7.741e-05	-4.45724	8.302e-06	SRPK2	0	intronic	0.647	7	2	5	1	0	0	7 : 104744219
11	8	rs1982564	87776287	87754626	87783335	0.038027	G	T	3.90001	9.619e-05	-4.00721	6.144e-05	RP11-386D6.1	0	ncRNA_intronic	4.195	5	5	15	0	1	0
12	8	rs1106761	142619234	142611220	142651709	0.00595405	A	G	-4.48897	7.157e-06	-6.12418	9.115e-10	AC138647.1	90396	intergenic	2.201		5	15	0	0	0	8 : 142615222
13	10	rs6584649	106745104	106563924	106830537	0.0458201	G	T	-3.82047	0.0001332	3.87781	0.0001054	SORCS3	0	intronic	2.61	5	9	15	1	0	0
14	10	rs34473884	133761285	133729181	133815530	0.017968	A	G	4.17158	3.025e-05	5.2554	1.477e-07	PPP2R2D	0	exonic	23	5	2	4	1	1	0
15	14	rs140802584	29419892	29396922	29677464	0.0343212	G	A	4.01782	5.874e-05	-3.93223	8.416e-05	CTD-2384A14.1:RP11-148E17.1	0:0	ncRNA_intronic	2.571	6	9	15	0	0	0
16	14	rs10149470	104017953	104017953	104018455	0.0352341	A	G	-3.9301	8.491e-05	-7.38778	1.493e-13	RNU7-160P	1209	intergenic	0.468	2b	1	5	1	1	1	14 : 104017953
17	17	rs7207582	44210933	43463493	44865603	0.00236711	G	A	4.71283	2.443e-06	-4.90764	9.218e-07	KANSL1	0	intronic	0.713	1f	4	5	1	1	1
18	20	rs6074798	14761710	14696882	14913496	0.00365961	A	G	5.10869	3.244e-07	4.73394	2.202e-06	MACROD2	0	intronic	0.043	6	7	15	1	0	0	20 : 14836243
19	21	rs2249666	40719241	40553845	40741068	0.0386514	T	C	3.89325	9.891e-05	4.05591	4.994e-05	HMGN1	0	intronic	0.249	6	1	5	1	1	1

## Sheet: Table S4
Table S4. Distinct genomic loci associated with both ASD and EDU at conjFDR<0.05
The most strongly associated lead SNPs in independent genomic loci are shown after merging regions < 250 KB apart into a single locus. Function = functional variant classification based on position in or outside of a gene; CADD = Combined Annotation-Dependent depletion score, which predict how deleterious the SNP effect is on protein structure/function (higher scores indicate more deleterious); R…
locusnum	CHR	LEAD_SNP	LEAD_BP	MinBP	MaxBP	conjFDR	A1	A2	ASD_Z	ASD_PVAL	EDU_Z	EDU_PVAL	nearestGene	dist	func	CADD	RDB	minChrState	commonChrState	posMapFilt	eqtlMapFilt	ciMapFilt	Loci in ASD GWAS
1	1	rs12049503	46021556	45797505	46021556	0.049667	A	C	3.77007	0.0001632	4.10065	4.12e-05	AKR1A1	0	intronic	1.325	1f	4	4	1	1	1
2	1	rs1620977	72729142	72512988	72729142	0.0425722	A	G	3.84859	0.0001188	10.4738	1.14e-25	NEGR1	0	intronic	2.006	6	5	15	1	1	0	1 : 72729142
3	1	rs66512	96511272	96467373	96590987	0.000577741	T	C	5.07901	3.794e-07	6.34119	2.28e-10	RP11-147C23.1	22835	intergenic	0.836		9	15	0	0	0	1 : 96561801
4	2	rs6543224	104227871	104056454	104387855	0.0151149	C	T	4.25927	2.051e-05	5.0144	5.32e-07	AC018880.2	12216	intergenic	1.644	7	9	15	0	0	0
5	2	rs3771643	159466149	159340038	159553686	0.0490196	C	T	3.79727	0.0001463	3.96662	7.29e-05	PKP4	0	intronic	5.385	7	5	5	1	0	0
6	2	rs12467438	215394416	215361613	215406125	0.0437229	A	G	-3.83552	0.0001253	4.28227	1.85e-05	AC107218.3:VWC2L:VWC2L-IT1	0:0:0	ncRNA_intronic	9.507	5	5	15	1	0	0
7	3	rs7625233	16852736	16843737	16879208	0.0416053	G	A	3.85954	0.0001136	-6.37497	1.83e-10	PLCL2	0		9.089	5	1	15	1	0	0
8	3	rs73073015	49503166	48564209	50239012	0.0214587	A	G	4.13777	3.507e-05	7.2509	4.14e-13	RNA5SP130	1381	intergenic	10.37	4	1	7	1	1	1
9	3	rs1452075	62481063	62462818	62518227	0.000327642	C	T	-5.19303	2.069e-07	-6.34739	2.19e-10	CADPS	0	intronic	3.345	7	5	15	1	0	0	3 : 62481063
10	3	rs73116288	70255465	70252572	70291268	0.0191442	G	T	4.17923	2.925e-05	4.5303	5.89e-06	RP11-231I13.2	0	ncRNA_intronic	7.558	7	5	15	0	0	0
11	3	rs7630176	157829953	157829953	158284861	0.0495673	C	T	-3.77115	0.0001625	4.13304	3.58e-05	RSRC1	0	intronic	5.934	4	2	15	1	1	0
12	4	rs35544582	42044036	41894946	42116794	0.0448881	C	A	-3.84942	0.0001184	-3.95417	7.68e-05	SLC30A9	0	intronic	0.274	7	4	4	1	1	0	4 : 42123728
13	4	rs7665487	105380212	105319081	105414222	0.0374855	A	G	3.90902	9.267e-05	-4.28347	1.84e-05	CXXC4	9256	intergenic	8.875	7	5	15	1	0	0
14	5	rs4916723	87854395	87792844	87932809	0.0024406	C	A	4.76125	1.924e-06	-7.0922	1.32e-12	LINC00461	0	ncRNA_intronic	18.19	5	2	15	0	0	0
15	5	rs4242244	92546237	92488009	92574385	0.0360932	G	T	-3.92592	8.64e-05	-5.03615	4.75e-07	POLD2P1	56897	intergenic	6.806	6	5	15	0	0	0
16	5	rs325481	104000752	103791044	104082179	0.0057385	G	A	5.04413	4.556e-07	-4.60726	4.08e-06	RP11-6N13.1	0	ncRNA_intronic	6.004		9	15	0	0	0	5 : 104012303
17	5	rs13188074	113801423	113788755	113995764	0.00357732	A	G	4.66803	3.041e-06	5.29657	1.18e-07	KCNN2	0	intronic	3.684	7	5	15	1	0	0
18	6	rs7762189	19235450	19211776	19358341	0.0478497	A	G	3.78958	0.0001509	-4.59877	4.25e-06	RP11-686D16.1	55099	intergenic	0.259	7	5	15	0	0	0
19	6	rs9467715	26341301	26341301	26341301	0.0491932	C	T	-3.77517	0.0001599	-5.4194	5.98e-08	RNU6-1259P	11897	intergenic	0.53	5	5	14	0	1	1
20	6	rs2388334	98591622	98547979	98591622	0.00139079	A	G	-4.89085	1.004e-06	-13.1337	2.11e-39	RP11-436D23.1	0	ncRNA_intronic	5.756	7	5	15	0	0	0	6 : 98591622
21	7	rs6461809	24526039	24526039	24536700	0.0120782	C	T	4.33209	1.477e-05	6.03908	1.55e-09	RNU6-1103P	50911	intergenic	2.864	6	5	15	0	1	0
22	7	rs7791307	71653304	71536769	71781766	0.00905489	A	G	-4.50495	6.639e-06	4.43145	9.36e-06	CALN1	0	intronic	0.871	6	5	15	1	1	0	1 : 72729142
23	7	rs143762771	104529950	104529950	105062363	0.017012	A	G	4.22019	2.441e-05	-4.23554	2.28e-05	LHFPL3	0	intronic	0.05	6	4	15	1	0	0	7 : 104744219
24	8	rs1982564	87776287	87754626	87783335	0.0382322	G	T	3.90001	9.619e-05	-5.46042	4.75e-08	RP11-386D6.1	0	ncRNA_intronic	4.195	5	5	15	0	1	0
25	8	rs11787216	142615222	142611220	142651709	0.00313833	T	C	-4.70115	2.587e-06	-9.27182	1.83e-20	AC138647.1	86384	intergenic	0.567	5	5	15	0	0	0	8 : 142615222
26	10	rs34473884	133761285	133729181	133815530	0.0195581	A	G	4.17158	3.025e-05	7.40414	1.32e-13	PPP2R2D	0	exonic	23	5	2	4	1	1	0
27	11	rs2237944	17838116	17804998	17852452	0.0424993	T	C	3.84942	0.0001184	4.69317	2.69e-06	SERGEF	0	intronic	1.145		1	15	1	0	0
28	13	rs77146055	59034875	58746132	59167198	0.0439117	A	G	3.83337	0.0001264	-4.01678	5.9e-05	RNY4P29	66913	intergenic	2.759	6	9	15	0	0	0
29	14	rs10149470	104017953	104017953	104018455	0.0357722	A	G	-3.9301	8.491e-05	-4.07967	4.51e-05	RNU7-160P	1209	intergenic	0.468	2b	1	5	1	1	1	14 : 104017953
30	17	rs2447091	2296014	2295405	2296014	0.0406808	C	T	3.8703	0.0001087	-4.67849	2.89e-06	MNT	0	intronic	15.7		1	1	1	1	1
31	17	rs55915917	43892784	43463493	44865603	0.00407098	G	T	4.63613	3.55e-06	-8.38835	4.93e-17	CRHR1:RP11-105N13.4	0:0	ncRNA_intronic	0.572	4	5	14	1	1	0
32	20	rs2224274	14760747	14696882	14899761	0.000444072	C	T	-5.13258	2.858e-07	-5.65264	1.58e-08	MACROD2	0	intronic	4.792	7	5	15	1	0	0	20 : 14836243

## Sheet: Table S5
Table S5. All SNPs jointly associated with ASD and INT having a conjFDR <0.10 and an r2≧0.6 with one of the independent significant SNPs
Function = functional variant classification based on position in or outside of a gene; CADD = Combined Annotation-Dependent depletion score, which predict how deleterious the SNP effect is on protein structure/function (higher scores indicate more deleterious); RegulomeDB scores predict likelihood of regulatory functionality (lower scores indicate higher likelihood); NA = not annotated; minChrSt…
locusnum	CHR	INDEP_BP	INDEP_SNP	CAND_BP	CAND_SNP	R2	LEAD_SNP	A1	A2	FDR	ASD_Z	ASD_PVAL	INT_Z	INT_PVAL	nearestGene	dist	func	CADD	RDB	minChrState	commonChrState	posMapFilt	eqtlMapFilt	ciMapFilt
1	1	72614077	rs7517923	72558138	rs12140090	0.96558	rs1620977	C	T	0.0551919	3.73569	0.0001872	7.99253	1.322e-15	NEGR1	0	intronic	9.247	6	15	15	1	1	0
1	1	72614077	rs7517923	72571656	rs1352082	0.96558	rs1620977	A	C	0.059463	3.69941	0.0002161	8.16415	3.237e-16	NEGR1	0	intronic	11.39	7	5	15	1	1	0
1	1	72614077	rs7517923	72573363	rs1486093	0.96558	rs1620977	C	T	0.0547274	3.73962	0.0001843	8.09303	5.82e-16	NEGR1	0	intronic	9.793	6	5	15	1	1	0
1	1	72614077	rs7517923	72573798	rs1564970	0.96558	rs1620977	C	T	0.0520837	3.76268	0.0001681	8.12149	4.605e-16	NEGR1	0	intronic	3.957	6	5	15	1	1	0
1	1	72614077	rs7517923	72578709	rs12402629	0.973427	rs1620977	C	T	0.0494688	3.78664	0.0001527	7.74285	9.721e-15	NEGR1	0	intronic	1.543	7	5	15	1	1	0
1	1	72614077	rs7517923	72584184	rs1486096	0.981168	rs1620977	A	G	0.0519864	3.76358	0.0001675	7.91087	2.556e-15	NEGR1	0	intronic	3.449	5	5	15	1	1	0
1	1	72614077	rs7517923	72586208	rs11209915	0.981168	rs1620977	T	C	0.0568455	3.72168	0.0001979	7.82927	4.907e-15	NEGR1	0	intronic	6.799	6	5	15	1	1	0
1	1	72614077	rs7517923	72586209	rs11209916	0.981168	rs1620977	G	A	0.0562534	3.7267	0.000194	7.81866	5.339e-15	NEGR1	0	intronic	7.903	6	5	15	1	1	0
1	1	72614077	rs7517923	72593174	rs4649954	0.901644	rs1620977	T	G	0.0647605	3.65708	0.0002551	7.89136	2.989e-15	NEGR1	0	intronic	3.623	6	5	15	1	1	0
1	1	72614077	rs7517923	72593767	rs12141628	0.981168	rs1620977	T	C	0.0520513	3.76298	0.0001679	7.97402	1.536e-15	NEGR1	0	intronic	4.978	6	5	15	1	1	0
1	1	72614077	rs7517923	72597051	rs12132602	0.981168	rs1620977	G	A	0.051061	3.77207	0.0001619	7.90094	2.768e-15	NEGR1	0	intronic	3.803	5	15	15	1	1	0
1	1	72614077	rs7517923	72610879	rs12133604	0.981168	rs1620977	T	G	0.0510778	3.77191	0.000162	7.82659	5.013e-15	NEGR1	0	intronic	3.349	6	5	15	1	1	0
1	1	72614077	rs7517923	72612371	rs11209921	0.981168	rs1620977	T	C	0.0501552	3.78036	0.0001566	7.97935	1.471e-15	NEGR1	0	intronic	2.768	6	5	15	1	1	0
1	1	72614077	rs7517923	72613608	rs7515320	0.981168	rs1620977	T	G	0.0479667	3.80034	0.0001445	8.05085	8.222e-16	NEGR1	0	intronic	0.151	6	4	15	1	1	0
1	1	72614077	rs7517923	72613917	rs7541218	0.981168	rs1620977	T	C	0.0478156	3.80171	0.0001437	7.9831	1.427e-15	NEGR1	0	intronic	1.99	7	4	15	1	1	0
1	1	72614077	rs7517923	72614077	rs7517923	1	rs1620977	T	G	0.0470668	3.80852	0.0001398	7.98511	1.404e-15	NEGR1	0	intronic	1.238	7	4	15	1	1	0
1	1	72614077	rs7517923	72618544	rs2422136	0.797486	rs1620977	C	A	0.0911214	-3.46869	0.000523	-7.06364	1.622e-12	NEGR1	0	intronic	0.99	6	5	15	1	1	0
1	1	72614077	rs7517923	72619961	rs2422137	0.939036	rs1620977	A	C	0.0680501	3.63093	0.0002824	8.16212	3.292e-16	NEGR1	0	intronic	0.389	7	5	15	1	1	0
1	1	72614077	rs7517923	72627031	rs11209928	0.791319	rs1620977	G	A	0.0761744	-3.57065	0.0003561	-7.15662	8.269e-13	NEGR1	0	intronic	3.165	5	5	15	1	1	0
1	1	72614077	rs7517923	72629795	rs2821296	0.794448	rs1620977	T	C	0.0749527	-3.57977	0.0003439	-7.16238	7.929e-13	NEGR1	0	intronic	1.649		7	15	1	1	0
1	1	72614077	rs7517923	72634986	rs2630431	0.794448	rs1620977	T	C	0.0764587	-3.56852	0.000359	-7.11838	1.092e-12	NEGR1	0	intronic	7.877	7	5	15	1	1	0
1	1	72614077	rs7517923	72639856	rs2821295	0.794448	rs1620977	G	A	0.0776984	-3.5599	0.000371	-7.08258	1.415e-12	NEGR1	0	intronic	0.705		15	15	1	1	0
1	1	72614077	rs7517923	72642650	rs2821293	0.794448	rs1620977	G	A	0.081808	-3.53131	0.0004135	-7.10606	1.194e-12	NEGR1	0	intronic	1.475		15	15	1	1	0
1	1	72614077	rs7517923	72642877	rs11209932	0.794448	rs1620977	A	G	0.0764587	-3.56852	0.000359	-7.02868	2.085e-12	NEGR1	0	intronic	5.606	7	7	15	1	1	0
1	1	72614077	rs7517923	72644116	rs12036585	0.79071	rs1620977	C	T	0.0790231	-3.55071	0.0003842	-7.11563	1.114e-12	NEGR1	0	intronic	11.75	5	2	15	1	1	0
1	1	72614077	rs7517923	72645734	rs6699731	0.79071	rs1620977	G	A	0.0762039	-3.57043	0.0003564	-7.10583	1.196e-12	NEGR1	0	intronic	2.356	6	5	15	1	1	0
1	1	72614077	rs7517923	72645850	rs6699841	0.781551	rs1620977	G	A	0.0790133	-3.55077	0.0003841	-6.90999	4.847e-12	NEGR1	0	intronic	13.23	7	5	15	1	1	0
1	1	72614077	rs7517923	72647443	rs11209933	0.794448	rs1620977	A	G	0.0761941	-3.5705	0.0003563	-7.12497	1.041e-12	NEGR1	0	intronic	3.877	7	5	15	1	1	0
1	1	72614077	rs7517923	72650925	rs6668604	0.79071	rs1620977	G	T	0.0789837	-3.55098	0.0003838	-6.95875	3.433e-12	NEGR1	0	intronic	0.514	7	5	15	1	1	0
1	1	72614077	rs7517923	72661104	rs2821288	0.79071	rs1620977	T	C	0.0761941	-3.5705	0.0003563	-7.13436	9.724e-13	NEGR1	0	intronic	2.067		5	15	1	1	0
1	1	72614077	rs7517923	72667196	rs2821285	0.79682	rs1620977	T	C	0.0789738	-3.55105	0.0003837	-7.13095	9.968e-13	NEGR1	0	intronic	0.983		5	15	1	1	0
1	1	72614077	rs7517923	72673194	rs2797540	0.806175	rs1620977	A	G	0.0823539	-3.5275	0.0004195	-7.12751	1.022e-12	NEGR1	0	intronic	0.706	6	1	15	1	1	0
1	1	72614077	rs7517923	72674489	rs1858600	0.79682	rs1620977	T	C	0.0799775	-3.54407	0.000394	-7.12248	1.06e-12	NEGR1	0	intronic	10.86	4	7	15	1	1	0
1	1	72614077	rs7517923	72681358	rs1194259	0.79682	rs1620977	G	A	0.0776473	-3.56025	0.0003705	-7.03111	2.049e-12	NEGR1	0	intronic	2.051	7	9	15	1	1	0
1	1	72614077	rs7517923	72683226	rs1675356	0.806175	rs1620977	T	C	0.0838331	-3.51715	0.0004362	-7.1056	1.198e-12	NEGR1	0	intronic	1.112	6	5	15	1	1	0
1	1	72614077	rs7517923	72688503	rs1194286	0.793679	rs1620977	A	G	0.075166	-3.57818	0.000346	-7.05532	1.722e-12	NEGR1	0	intronic	3.972		5	15	1	1	0
1	1	72614077	rs7517923	72695547	rs1205484	0.793679	rs1620977	T	G	0.0779326	-3.55827	0.0003733	-6.99445	2.663e-12	NEGR1	0	intronic	16.26		5	15	1	1	0
1	1	72614077	rs7517923	72696927	rs1194273	0.803024	rs1620977	T	C	0.0727336	-3.59628	0.0003228	-6.98661	2.816e-12	NEGR1	0	intronic	3.542		5	15	1	1	0
1	1	72614077	rs7517923	72701100	rs2797543	0.803024	rs1620977	A	G	0.0737818	-3.58849	0.0003326	-7.09506	1.293e-12	NEGR1	0	intronic	5.261	5	5	15	1	1	0
1	1	72614077	rs7517923	72701965	rs1194271	0.789917	rs1620977	G	A	0.0732295	-3.5926	0.0003274	-6.92496	4.361e-12	NEGR1	0	intronic	0.273		5	15	1	1	0
1	1	72614077	rs7517923	72702313	rs1194270	0.789917	rs1620977	C	T	0.0732295	-3.5926	0.0003274	-6.94577	3.764e-12	NEGR1	0	intronic	1.023		5	15	1	1	0
1	1	72614077	rs7517923	72703860	rs1194269	0.793679	rs1620977	A	G	0.0756089	-3.57487	0.0003504	-7.03138	2.045e-12	NEGR1	0	intronic	1.296		5	15	1	1	0
1	1	72614077	rs7517923	72704526	rs1194267	0.789917	rs1620977	G	A	0.0763511	-3.56933	0.0003579	-7.0576	1.694e-12	NEGR1	0	intronic	6.109		5	15	1	1	0
1	1	72614077	rs7517923	72707226	rs1194265	0.789917	rs1620977	G	A	0.0763511	-3.56933	0.0003579	-7.05348	1.745e-12	NEGR1	0	intronic	4.001		7	15	1	1	0
1	1	72614077	rs7517923	72708584	rs1026567	0.789917	rs1620977	G	A	0.0771221	-3.56389	0.0003654	-7.03996	1.923e-12	NEGR1	0	intronic	0.081		15	15	1	1	0
1	1	72614077	rs7517923	72709042	rs1026566	0.793679	rs1620977	A	G	0.0776882	-3.55997	0.0003709	-7.07929	1.449e-12	NEGR1	0	intronic	0.9		14	15	1	1	0
1	1	72614077	rs7517923	72712529	rs1194284	0.789917	rs1620977	C	A	0.0794741	-3.54757	0.0003888	-7.07986	1.443e-12	NEGR1	0	intronic	2.323		5	15	1	1	0
1	1	72614077	rs7517923	72713037	rs1194283	0.789917	rs1620977	T	C	0.0896776	-3.47814	0.0005049	-7.03261	2.027e-12	NEGR1	0	intronic	2.446		5	15	1	1	0
1	1	72614077	rs7517923	72713559	rs1194282	0.79922	rs1620977	C	T	0.094353	-3.44745	0.0005659	-7.00409	2.486e-12	NEGR1	0	intronic	0.275		4	15	1	1	0
1	1	72614077	rs7517923	72714003	rs1194281	0.789917	rs1620977	C	T	0.0944399	-3.44688	0.0005671	-7.00036	2.553e-12	NEGR1	0	intronic	0.066		5	15	1	1	0
1	1	72614077	rs7517923	72714220	rs1194278	0.789917	rs1620977	T	C	0.0999134	-3.41288	0.0006428	-6.98287	2.892e-12	NEGR1	0	intronic	0.091		5	15	1	1	0
1	1	72729142	rs1620977	72588119	rs12128707	0.773631	rs1620977	G	A	0.0458387	3.82028	0.0001333	8.67197	4.247e-18	NEGR1	0	intronic	7.961	5	1	15	1	1	0
1	1	72729142	rs1620977	72615118	rs11587434	0.772002	rs1620977	A	G	0.0437066	3.84147	0.0001223	8.48324	2.19e-17	NEGR1	0	intronic	0.131	7	5	15	1	1	0
1	1	72729142	rs1620977	72729142	rs1620977	1	rs1620977	A	G	0.0429878	3.84859	0.0001188	8.18259	2.778e-16	NEGR1	0	intronic	2.006	6	5	15	1	1	0
2	1	96499450	rs161116	96479395	rs321231	0.965717	rs161116	G	A	0.0425445	3.86718	0.0001101	3.83927	0.0001234	RP11-147C23.1	0	intronic	6.087		14	15	1	0	0
2	1	96499450	rs161116	96481173	rs619758	0.965717	rs161116	C	T	0.0421679	3.88698	0.0001015	3.84328	0.0001214	RP11-147C23.1	0	intronic	5.605		14	15	1	0	0
2	1	96499450	rs161116	96499450	rs161116	1	rs161116	A	C	0.0380154	3.90013	9.614e-05	4.09992	4.133e-05	RP11-147C23.1	11013	intergenic	2.855		5	15	0	0	0
3	3	16852736	rs7625233	16851202	rs748832	0.995885	rs7625233	G	A	0.0503111	3.77894	0.0001575	-4.965	6.87e-07	PLCL2	0		11.85		2	15	1	0	0
3	3	16852736	rs7625233	16851755	rs6800583	0.991751	rs7625233	A	G	0.0479667	3.80034	0.0001445	-5.04047	4.644e-07	PLCL2	0		10.77	4	2	15	1	0	0
3	3	16852736	rs7625233	16852736	rs7625233	1	rs7625233	G	A	0.0418797	3.85954	0.0001136	-4.87776	1.073e-06	PLCL2	0		9.089	5	1	15	1	0	0
3	3	16852736	rs7625233	16856216	rs11918777	0.963775	rs7625233	C	A	0.0756589	3.5745	0.0003509	-5.01852	5.207e-07	PLCL2	0		0.303	7	5	15	1	0	0
3	3	16852736	rs7625233	16856682	rs9813513	0.963775	rs7625233	C	T	0.0694705	3.62044	0.0002941	-4.98435	6.217e-07	PLCL2	0		1.166	5	5	15	1	0	0
3	3	16852736	rs7625233	16865845	rs9882532	0.934978	rs7625233	C	T	0.0617035	3.68124	0.0002321	-4.51755	6.256e-06	PLCL2	0		0.285	3a	2	15	1	0	0
3	3	16852736	rs7625233	16870340	rs6773869	0.939149	rs7625233	G	A	0.0496642	3.78485	0.0001538	-4.74355	2.1e-06	PLCL2	0		3.607	3a	5	15	1	0	0
3	3	16852736	rs7625233	16875451	rs6804663	0.86773	rs7625233	G	A	0.0921202	3.46214	0.0005359	-4.20751	2.582e-05	PLCL2	0		7.249	5	5	15	1	0	0
3	3	16852736	rs7625233	16875823	rs12489270	0.86773	rs7625233	C	T	0.0819269	3.53048	0.0004148	-4.1822	2.887e-05	PLCL2	0		4.66	4	5	15	1	0	0
3	3	16852736	rs7625233	16876255	rs12493035	0.86773	rs7625233	G	A	0.0952274	3.44169	0.0005781	-4.20637	2.595e-05	PLCL2	0		4.998	7	5	15	1	0	0
3	3	16852736	rs7625233	16876476	rs1449538	0.86773	rs7625233	C	T	0.0946849	3.44526	0.0005705	-4.4091	1.038e-05	PLCL2	0		5.061	6	5	15	1	0	0
4	3	49200137	rs1134043	49200137	rs1134043	1	rs73073015	T	G	0.027586	4.02424	5.716e-05	5.39775	6.748e-08	CCDC71	0	UTR3	8.722		4	4	1	1	1
4	3	49503166	rs73073015	48725707	rs1048940	0.83085	rs73073015	T	C	0.0441678	3.83689	0.0001246	4.77737	1.776e-06	IP6K2	0	exonic	19.23		4	4	1	1	1
4	3	49503166	rs73073015	48737847	rs73080312	0.83085	rs73073015	T	C	0.043666	3.84187	0.0001221	4.93662	7.949e-07	IP6K2	0	intronic	2.551	7	2	4	1	1	1
4	3	49503166	rs73073015	48832146	rs73080361	0.897964	rs73073015	A	G	0.0616756	3.68146	0.0002319	5.94778	2.718e-09	PRKAR2A	0	intronic	3.735	7	5	5	1	1	1
4	3	49503166	rs73073015	48885212	rs55761431	0.907876	rs73073015	A	G	0.0630014	3.671	0.0002416	5.90714	3.481e-09	PRKAR2A:PRKAR2A-AS1	0:0	ncRNA_exonic	17.7	4	1	1	1	1	1
4	3	49503166	rs73073015	48887027	rs11709092	0.907876	rs73073015	C	A	0.0626106	3.67409	0.0002387	5.85299	4.828e-09	PRKAR2A-AS1	0	ncRNA_exonic	9.607	6	5	5	1	1	1
4	3	49503166	rs73073015	49071450	rs113519699	0.897338	rs73073015	C	A	0.0528027	3.75607	0.0001726	5.9362	2.917e-09	QRICH1	0	intronic	1.963	6	4	4	1	1	1
4	3	49503166	rs73073015	49072228	rs56004653	0.908092	rs73073015	C	T	0.0522773	3.7609	0.0001693	5.91121	3.396e-09	QRICH1	0	intronic	5.758	5	4	4	1	1	1
4	3	49503166	rs73073015	49113729	rs73082362	0.907876	rs73073015	T	C	0.0429043	3.84942	0.0001184	6.03365	1.603e-09	QRICH1	0	intronic	0.431	5	4	4	1	1	1
4	3	49503166	rs73073015	49189316	rs55921200	0.92809	rs73073015	C	T	0.0404119	3.87414	0.000107	5.9268	3.089e-09	RP11-694I15.7	0	ncRNA_intronic	6.36	5	5	15	0	1	1
4	3	49503166	rs73073015	49252583	rs112890859	0.917967	rs73073015	G	A	0.0565129	3.7245	0.0001957	6.00067	1.965e-09	CCDC36	0	intronic	4.668	7	4	15	1	1	0
4	3	49503166	rs73073015	49406095	rs11716445	0.979671	rs73073015	A	G	0.0432984	3.84551	0.0001203	6.12868	8.861e-10	RHOA	0	intronic	6.996	6	4	4	1	1	1
4	3	49503166	rs73073015	49503166	rs73073015	1	rs73073015	A	G	0.0199261	4.13777	3.507e-05	6.27807	3.428e-10	RNA5SP130	1381	intergenic	10.37	4	1	7	1	1	1
4	3	49503166	rs73073015	49534439	rs113176147	0.979322	rs73073015	T	G	0.0446206	3.8324	0.0001269	6.00985	1.857e-09	DAG1	0	intronic	0.287	6	4	5	1	1	1
4	3	49503166	rs73073015	49732699	rs55662945	0.938262	rs73073015	T	C	0.0800256	3.54374	0.0003945	6.31555	2.692e-10	RNF123	0	intronic	2.198	6	2	5	1	1	1
4	3	49503166	rs73073015	49826987	rs73077200	0.979671	rs73073015	T	C	0.0424612	3.8538	0.0001163	6.08485	1.166e-09	CDHR4	1177	intergenic	9.436	5	5	15	1	1	0
4	3	49503166	rs73073015	49861068	rs73079012	0.931732	rs73073015	C	T	0.0768828	3.56555	0.0003631	6.16362	7.11e-10	AC139451.1	4581	intergenic	1.437	6	5	15	1	1	0
4	3	49503166	rs73073015	49908338	rs11716961	0.861418	rs73073015	A	G	0.0964569	3.43402	0.0005947	5.14664	2.652e-07	CAMKV	682	upstream	3.778	5	5	13	1	1	1
4	3	49503166	rs73073015	50189531	rs73080977	0.759367	rs73073015	T	G	0.0850975	3.50829	0.000451	5.65102	1.595e-08	RP11-493K19.3	0	ncRNA_intronic	5.977	5	2	14	1	1	0
5	5	81268499	rs73134709	81261923	rs74906189	0.988472	rs73134709	G	A	0.062362	-3.8322	0.000127	-3.66339	0.0002489	ATG10	5920	intergenic	2.066	6	5	15	1	1	1
5	5	81268499	rs73134709	81268499	rs73134709	1	rs73134709	A	G	0.0410397	-3.90107	9.577e-05	-3.85527	0.0001156	ATG10	0	intronic	5.044	4	1	1	1	1	1
5	5	81268499	rs73134709	81272732	rs34981833	1	rs73134709	C	T	0.0476081	-3.91117	9.185e-05	-3.78925	0.0001511	ATG10	0	intronic	4.396	7	4	5	1	1	0
5	5	81268499	rs73134709	81278375	rs12108681	0.966064	rs73134709	C	T	0.0587048	-3.89377	9.87e-05	-3.69314	0.0002215	ATG10	0	intronic	0.506	5	4	5	1	1	0
5	5	81268499	rs73134709	81297077	rs6875409	1	rs73134709	G	A	0.0724556	-3.76855	0.0001642	-3.59164	0.0003286	ATG10	0	intronic	2.235	6	4	15	1	1	0
5	5	81268499	rs73134709	81312399	rs111907176	1	rs73134709	G	A	0.0617256	-3.82326	0.0001317	-3.66858	0.0002439	ATG10	0	intronic	11.65	6	5	15	1	1	0
5	5	81268499	rs73134709	81322547	rs17243791	0.994238	rs73134709	G	A	0.0900661	-3.78534	0.0001535	-3.48339	0.0004951	ATG10	0	intronic	12.9	6	5	15	1	1	0
5	5	81268499	rs73134709	81326622	rs73134722	0.994238	rs73134709	A	G	0.0530769	-3.82457	0.000131	-3.73853	0.0001851	ATG10	0	intronic	0.501	6	5	15	1	1	0
5	5	81268499	rs73134709	81351443	rs7733122	0.994238	rs73134709	T	C	0.0713383	-3.74513	0.0001803	-3.62018	0.0002944	ATG10	0	intronic	1.361	6	5	15	1	1	0
5	5	81268499	rs73134709	81359709	rs112413913	0.994238	rs73134709	G	A	0.0674931	-3.76268	0.0001681	-3.63489	0.0002781	ATG10	0	intronic	5.045	7	5	15	1	1	0
5	5	81268499	rs73134709	81370760	rs73134739	0.994238	rs73134709	C	T	0.0724869	-3.75549	0.000173	-3.59323	0.0003266	ATG10	0	intronic	12.89	5	1	15	1	1	0
5	5	81268499	rs73134709	81371755	rs12108833	1	rs73134709	G	A	0.0923815	-3.74277	0.000182	-3.47065	0.0005192	ATG10	0	intronic	2.236	6	5	15	1	1	0
5	5	81268499	rs73134709	81378294	rs73134747	0.994238	rs73134709	T	C	0.0724283	-3.73024	0.0001913	-3.63048	0.0002829	ATG10	0	intronic	2.324	6	5	15	1	1	0
5	5	81268499	rs73134709	81386035	rs112355050	0.994238	rs73134709	T	C	0.0720677	-3.708	0.0002089	-3.66421	0.0002481	ATG10	0	intronic	0.519	5	5	15	1	1	0
5	5	81268499	rs73134709	81389950	rs324914	0.994238	rs73134709	C	T	0.0896057	-3.71575	0.0002026	-3.49268	0.0004782	ATG10	0	intronic	4.401	6	4	15	1	1	0
5	5	81268499	rs73134709	81400264	rs324910	0.994241	rs73134709	C	A	0.0812792	-3.64702	0.0002653	-3.6592	0.000253	ATG10	0	intronic	0.292	6	5	15	1	1	0
5	5	81268499	rs73134709	81406770	rs57621982	1	rs73134709	T	C	0.0772602	-3.69568	0.0002193	-3.63075	0.0002826	ATG10	0	intronic	2.753	7	5	15	1	1	0
5	5	81268499	rs73134709	81425592	rs4293895	0.988571	rs73134709	C	T	0.0602974	-3.77846	0.0001578	-3.69188	0.0002226	ATG10	0	intronic	2.992	5	4	15	1	1	1
5	5	81268499	rs73134709	81428261	rs113654433	0.994238	rs73134709	A	C	0.0641727	-3.90798	9.307e-05	-3.65043	0.0002618	ATG10	0	intronic	0.827	7	5	15	1	1	1
5	5	81268499	rs73134709	81443520	rs73136782	1	rs73134709	G	T	0.0563408	-3.76253	0.0001682	-3.76164	0.0001688	ATG10	0	UTR3	3.127	5	5	15	1	1	1
5	5	81268499	rs73134709	81447995	rs1428940	1	rs73134709	G	A	0.0686225	-3.77894	0.0001575	-3.61895	0.0002958	ATG10	0	intronic	1.089	6	5	15	1	1	1
5	5	81268499	rs73134709	81448283	rs60733727	0.994238	rs73134709	A	G	0.0639073	-3.81661	0.0001353	-3.6523	0.0002599	ATG10	0	intronic	1.183	7	5	15	1	1	1
6	5	92546237	rs4242244	92488009	rs67779882	0.715057	rs4242244	G	A	0.0804744	-3.54061	0.0003992	-5.67647	1.375e-08	CTD-2091N23.1	83633	intergenic	5.071	5	1	15	0	0	0
6	5	92546237	rs4242244	92488062	rs66496757	0.715057	rs4242244	G	A	0.0804744	-3.54061	0.0003992	-5.65308	1.576e-08	CTD-2091N23.1	83686	intergenic	6.233	5	1	15	0	0	0
6	5	92546237	rs4242244	92490864	rs6873704	0.715057	rs4242244	C	A	0.0804839	-3.54055	0.0003993	-5.48787	4.068e-08	CTD-2091N23.1	86488	intergenic	1.283	7	5	15	0	0	0
6	5	92546237	rs4242244	92493318	rs6557063	0.715057	rs4242244	C	T	0.0817621	-3.53163	0.000413	-5.68346	1.32e-08	CTD-2091N23.1	88942	intergenic	1.711	5	5	15	0	0	0
6	5	92546237	rs4242244	92500822	rs4293897	0.818073	rs4242244	G	T	0.0438881	-3.83967	0.0001232	-5.87276	4.286e-09	CTD-2091N23.1	96446	intergenic	1.246	4	5	15	0	0	0
6	5	92546237	rs4242244	92512479	rs6897861	0.831514	rs4242244	G	A	0.0419233	-3.85911	0.0001138	-5.98201	2.204e-09	POLD2P1	90655	intergenic	0.691	5	5	15	0	0	0
6	5	92546237	rs4242244	92512481	rs6897863	0.831514	rs4242244	C	A	0.0419233	-3.85911	0.0001138	-5.9829	2.192e-09	POLD2P1	90653	intergenic	0.131	5	5	15	0	0	0
6	5	92546237	rs4242244	92515301	rs7714485	0.831514	rs4242244	C	A	0.0387238	-3.89247	9.923e-05	-5.61383	1.979e-08	POLD2P1	87833	intergenic	9.324	6	5	15	0	0	0
6	5	92546237	rs4242244	92517203	rs4242240	0.842951	rs4242244	G	A	0.0408337	-3.86986	0.0001089	-5.89333	3.785e-09	POLD2P1	85931	intergenic	2.23	7	5	15	0	0	0
6	5	92546237	rs4242244	92518370	rs4242241	0.842951	rs4242244	T	C	0.0412396	-3.86586	0.0001107	-5.91306	3.358e-09	POLD2P1	84764	intergenic	0.688	5	5	15	0	0	0
6	5	92546237	rs4242244	92518686	rs4264926	0.842951	rs4242244	T	C	0.0408337	-3.86986	0.0001089	-5.75728	8.548e-09	POLD2P1	84448	intergenic	2.222		5	15	0	0	0
6	5	92546237	rs4242244	92518724	rs4551051	0.842951	rs4242244	C	T	0.0408337	-3.86986	0.0001089	-5.88149	4.066e-09	POLD2P1	84410	intergenic	2.946	7	5	15	0	0	0
6	5	92546237	rs4242244	92519387	rs4242242	0.818073	rs4242244	A	G	0.0473573	-3.80588	0.0001413	-5.82254	5.796e-09	POLD2P1	83747	intergenic	1.438	7	5	15	0	0	0
6	5	92546237	rs4242244	92520266	rs4469186	0.842951	rs4242244	C	T	0.0425886	-3.85254	0.0001169	-5.69902	1.205e-08	POLD2P1	82868	intergenic	0.46	5	5	15	0	0	0
6	5	92546237	rs4242244	92521022	rs4449514	0.842951	rs4242244	C	T	0.0411724	-3.86652	0.0001104	-5.88238	4.044e-09	POLD2P1	82112	intergenic	1.54	7	5	15	0	0	0
6	5	92546237	rs4242244	92522764	rs4869415	0.838851	rs4242244	G	A	0.0493438	-3.78778	0.000152	-5.87506	4.227e-09	POLD2P1	80370	intergenic	4.665	7	5	15	0	0	0
6	5	92546237	rs4242244	92528272	rs4285204	0.842951	rs4242244	T	C	0.0429878	-3.84859	0.0001188	-5.85289	4.831e-09	POLD2P1	74862	intergenic	3.505	4	2	15	0	0	0
6	5	92546237	rs4242244	92528309	rs4632783	0.842951	rs4242244	G	A	0.0420535	-3.85783	0.0001144	-5.79915	6.665e-09	POLD2P1	74825	intergenic	2.405	3a	2	15	0	0	0
6	5	92546237	rs4242244	92529268	rs67862943	0.818073	rs4242244	A	G	0.0488924	-3.7919	0.0001495	-5.85934	4.647e-09	POLD2P1	73866	intergenic	17.4	5	5	15	0	0	0
6	5	92546237	rs4242244	92531074	rs4302568	0.842951	rs4242244	T	C	0.0412396	-3.86586	0.0001107	-5.78619	7.2e-09	POLD2P1	72060	intergenic	0.785	7	5	15	0	0	0
6	5	92546237	rs4242244	92533363	rs4321736	0.834766	rs4242244	T	C	0.0428205	-3.85024	0.000118	-5.70639	1.154e-08	POLD2P1	69771	intergenic	5.637	7	5	15	0	0	0
6	5	92546237	rs4242244	92536365	rs10428523	0.834766	rs4242244	A	G	0.0426521	-3.85191	0.0001172	-5.71454	1.1e-08	POLD2P1	66769	intergenic	1.769	6	5	15	0	0	0
6	5	92546237	rs4242244	92537336	rs11738974	0.821157	rs4242244	A	G	0.0448536	-3.83008	0.0001281	-5.691	1.263e-08	POLD2P1	65798	intergenic	0.364	6	5	15	0	0	0
6	5	92546237	rs4242244	92538798	rs59262698	0.846301	rs4242244	C	T	0.0395587	-3.88341	0.000103	-5.8504	4.904e-09	POLD2P1	64336	intergenic	4.306	7	7	15	0	0	0
6	5	92546237	rs4242244	92538853	rs57542119	0.846301	rs4242244	C	T	0.0419015	-3.85933	0.0001137	-5.88112	4.075e-09	POLD2P1	64281	intergenic	6.568	5	7	15	0	0	0
6	5	92546237	rs4242244	92546237	rs4242244	1	rs4242244	G	T	0.0356236	-3.92592	8.64e-05	-5.48409	4.156e-08	POLD2P1	56897	intergenic	6.806	6	5	15	0	0	0
6	5	92546237	rs4242244	92562015	rs11742251	0.722055	rs4242244	G	A	0.0583978	-3.70849	0.0002085	-5.88598	3.957e-09	POLD2P1	41119	intergenic	10.88	3a	5	15	0	0	0
6	5	92546237	rs4242244	92562746	rs6863269	0.889028	rs4242244	T	C	0.0400533	-3.87804	0.0001053	-5.65929	1.52e-08	POLD2P1	40388	intergenic	9.854	7	7	15	0	0	0
6	5	92546237	rs4242244	92562938	rs6871374	0.889028	rs4242244	G	A	0.0399253	-3.87943	0.0001047	-5.63145	1.787e-08	POLD2P1	40196	intergenic	14.36	6	14	15	0	0	0
7	5	104012579	rs325507	104012579	rs325507	1	rs325507	A	C	0.04144	3.86388	0.0001116	4.14731	3.364e-05	RP11-6N13.1	0	ncRNA_intronic	2.274	5	9	15	0	0	0
8	5	113885693	rs2194872	113857414	rs2559998	0.97354	rs414517	T	G	0.0541076	-3.74485	0.0001805	-5.29258	1.206e-07	RP11-492A10.1	0	ncRNA_intronic	0.038	7	9	15	0	0	0
8	5	113885693	rs2194872	113864857	rs619754	0.995491	rs414517	C	T	0.0451418	-3.82722	0.0001296	-5.2872	1.242e-07	RP11-492A10.1	0	ncRNA_intronic	4.522		9	15	0	0	0
8	5	113885693	rs2194872	113864888	rs664321	0.995491	rs414517	C	T	0.0449693	-3.82893	0.0001287	-5.2699	1.365e-07	RP11-492A10.1	0	ncRNA_intronic	2.488		9	15	0	0	0
8	5	113885693	rs2194872	113864985	rs1834398	0.995491	rs414517	T	C	0.0412396	-3.86586	0.0001107	-5.30032	1.156e-07	RP11-492A10.1	0	ncRNA_intronic	1.373		9	15	0	0	0
8	5	113885693	rs2194872	113875957	rs418939	1	rs414517	C	T	0.0417048	-3.86127	0.0001128	-5.26148	1.429e-07	RP11-492A10.1	0	ncRNA_intronic	7.923	6	9	15	0	0	0
8	5	113885693	rs2194872	113878658	rs380197	1	rs414517	G	A	0.0392963	-3.88626	0.0001018	-5.1448	2.678e-07	RP11-492A10.1	0	ncRNA_intronic	12.72		9	15	0	0	0
8	5	113885693	rs2194872	113880315	rs403095	1	rs414517	C	T	0.0385288	-3.89458	9.837e-05	-5.21909	1.798e-07	RP11-492A10.1	0	ncRNA_intronic	3.704		7	15	0	0	0
8	5	113885693	rs2194872	113880764	rs368215	1	rs414517	C	A	0.0377483	-3.90302	9.5e-05	-5.09562	3.476e-07	RP11-492A10.1	0	ncRNA_intronic	4.179		7	15	0	0	0
8	5	113885693	rs2194872	113883341	rs388315	1	rs414517	G	A	0.0424399	-3.85401	0.0001162	-5.18372	2.175e-07	RP11-492A10.1	0	ncRNA_intronic	2.896		9	15	0	0	0
8	5	113885693	rs2194872	113883766	rs375304	1	rs414517	G	A	0.0372622	-3.90827	9.296e-05	-5.18605	2.148e-07	RP11-492A10.1	0	ncRNA_intronic	8.618		9	15	0	0	0
8	5	113885693	rs2194872	113884204	rs388032	1	rs414517	G	A	0.0374493	-3.90625	9.374e-05	-5.15815	2.494e-07	RP11-492A10.1	0	ncRNA_intronic	3.315	7	9	15	0	0	0
8	5	113885693	rs2194872	113885693	rs2194872	1	rs414517	T	G	0.0335806	-3.9497	7.825e-05	-5.17798	2.243e-07	RP11-492A10.1	0	ncRNA_intronic	2.951		9	15	0	0	0
8	5	113885693	rs2194872	113886257	rs611465	0.995499	rs414517	T	C	0.0386514	-3.89325	9.891e-05	-5.1794	2.226e-07	RP11-492A10.1	0	ncRNA_intronic	1.95	6	9	15	0	0	0
8	5	113885693	rs2194872	113886516	rs612461	0.995499	rs414517	C	T	0.0386741	-3.89301	9.901e-05	-5.18458	2.165e-07	RP11-492A10.1	0	ncRNA_intronic	3.185	7	9	15	0	0	0
8	5	113885693	rs2194872	113886712	rs398495	0.995499	rs414517	G	A	0.0388228	-3.89139	9.967e-05	-5.1692	2.351e-07	RP11-492A10.1	0	ncRNA_intronic	4.111		9	15	0	0	0
8	5	113885693	rs2194872	113887522	rs392057	0.995499	rs414517	T	G	0.0431539	-3.84694	0.0001196	-5.20205	1.971e-07	RP11-492A10.1	0	ncRNA_intronic	4.239	7	9	15	0	0	0
8	5	113885693	rs2194872	113894002	rs665598	0.955955	rs414517	C	T	0.0640942	-3.66236	0.0002499	-4.80636	1.537e-06	RP11-492A10.1	0	ncRNA_intronic	1.266		9	15	0	0	0
8	5	113885693	rs2194872	113895253	rs601135	0.991034	rs414517	T	G	0.0441479	-3.83709	0.0001245	-5.45224	4.974e-08	RP11-492A10.1	0	ncRNA_intronic	1.475		9	15	0	0	0
8	5	113885693	rs2194872	113898450	rs454540	0.991034	rs414517	A	C	0.0423759	-3.85464	0.0001159	-5.38923	7.076e-08	RP11-492A10.1	0	ncRNA_intronic	0.913		9	15	0	0	0
8	5	113885693	rs2194872	113901441	rs395930	0.991034	rs414517	C	T	0.0425462	-3.85296	0.0001167	-5.46102	4.734e-08	RP11-492A10.1	0	ncRNA_intronic	4.255		9	15	0	0	0
8	5	113885693	rs2194872	113904725	rs383367	0.986607	rs414517	G	A	0.0420318	-3.85804	0.0001143	-5.31138	1.088e-07	RP11-492A10.1	0	ncRNA_intronic	1.689		9	15	0	0	0
8	5	113885693	rs2194872	113905854	rs643898	0.986607	rs414517	G	A	0.0447374	-3.83124	0.0001275	-5.43525	5.472e-08	RP11-492A10.1	0	ncRNA_intronic	3.448		9	15	0	0	0
8	5	113885693	rs2194872	113907058	rs1593362	0.986607	rs414517	C	T	0.0460606	-3.81807	0.0001345	-5.40818	6.367e-08	RP11-492A10.1	0	ncRNA_intronic	5.454		9	15	0	0	0
8	5	113885693	rs2194872	113908420	rs666560	0.986607	rs414517	C	T	0.0455773	-3.82288	0.0001319	-5.36362	8.157e-08	RP11-492A10.1	0	ncRNA_intronic	4.734	7	9	15	0	0	0
8	5	113885693	rs2194872	113909038	rs12652748	0.986607	rs414517	G	A	0.0444051	-3.83454	0.0001258	-5.30756	1.111e-07	RP11-492A10.1	0	ncRNA_intronic	2.525	7	9	15	0	0	0
8	5	113885693	rs2194872	113911434	rs411885	0.986595	rs414517	C	T	0.0469693	-3.80941	0.0001393	-5.42669	5.741e-08	RP11-492A10.1	0	ncRNA_intronic	6.075		7	15	0	0	0
8	5	113885693	rs2194872	113914493	rs403133	0.977782	rs414517	G	A	0.044346	-3.83513	0.0001255	-5.50479	3.696e-08	RP11-492A10.1:CTC-313D10.1	0:0	ncRNA_intronic	5.138	7	9	15	0	0	0
8	5	113885693	rs2194872	113916158	rs2553493	0.986607	rs414517	C	T	0.0469106	-3.80994	0.000139	-5.4557	4.878e-08	RP11-492A10.1	0	ncRNA_intronic	4.048		9	15	0	0	0
8	5	113885693	rs2194872	113916923	rs382784	0.982071	rs414517	T	C	0.0423759	-3.85464	0.0001159	-5.41441	6.149e-08	RP11-492A10.1	0	ncRNA_intronic	7.032		7	15	0	0	0
8	5	113885693	rs2194872	113917276	rs408518	0.986607	rs414517	A	G	0.0469302	-3.80976	0.0001391	-5.40041	6.649e-08	RP11-492A10.1	0	ncRNA_intronic	1.195		7	15	0	0	0
8	5	113885693	rs2194872	113919791	rs419251	0.986607	rs414517	C	T	0.0494866	-3.78647	0.0001528	-5.34054	9.267e-08	RP11-492A10.1	0	ncRNA_intronic	0.568		9	15	0	0	0
8	5	113885693	rs2194872	113922390	rs416155	0.991034	rs414517	A	G	0.0447568	-3.83105	0.0001276	-5.40116	6.621e-08	RP11-492A10.1	0	ncRNA_intronic	7.492	7	9	15	0	0	0
8	5	113885693	rs2194872	113925544	rs441925	0.986595	rs414517	T	C	0.0464441	-3.81424	0.0001366	-5.34099	9.244e-08	RP11-492A10.1	0	ncRNA_intronic	5.544	7	9	15	0	0	0
8	5	113885693	rs2194872	113928545	rs661082	0.995499	rs414517	C	A	0.0470084	-3.80905	0.0001395	-5.31716	1.054e-07	RP11-492A10.1	0	ncRNA_intronic	1.737	7	9	15	0	0	0
8	5	113885693	rs2194872	113929458	rs431598	0.991041	rs414517	C	T	0.0499808	-3.78196	0.0001556	-5.29168	1.212e-07	RP11-492A10.1	0	ncRNA_intronic	0.534	7	9	15	0	0	0
8	5	113885693	rs2194872	113929835	rs440399	0.991041	rs414517	G	T	0.0516101	-3.76703	0.0001652	-5.17534	2.275e-07	RP11-492A10.1	0	ncRNA_intronic	0.25	7	9	15	0	0	0
8	5	113885693	rs2194872	113930285	rs402641	0.986595	rs414517	A	C	0.059941	-3.69533	0.0002196	-5.25791	1.457e-07	RP11-492A10.1	0	ncRNA_intronic	2.445	7	9	15	0	0	0
8	5	113885693	rs2194872	113930618	rs427446	0.986595	rs414517	C	T	0.0551919	-3.73569	0.0001872	-5.21766	1.812e-07	RP11-492A10.1	0	ncRNA_intronic	1.401	6	9	15	0	0	0
8	5	113885693	rs2194872	113931110	rs377020	0.986595	rs414517	C	T	0.0609704	-3.68701	0.0002269	-5.2699	1.365e-07	RP11-492A10.1	0	ncRNA_intronic	0.863	7	9	15	0	0	0
8	5	113885693	rs2194872	113931571	rs7717990	0.986595	rs414517	G	A	0.0551919	-3.73569	0.0001872	-5.17624	2.264e-07	RP11-492A10.1	0	ncRNA_intronic	1.211	7	7	15	0	0	0
8	5	113885693	rs2194872	113932029	rs694016	0.986595	rs414517	A	C	0.055176	-3.73583	0.0001871	-5.13731	2.787e-07	RP11-492A10.1	0	ncRNA_intronic	3.149	5	7	15	0	0	0
8	5	113885693	rs2194872	113932501	rs403336	0.986595	rs414517	C	T	0.0544028	-3.74236	0.0001823	-5.1207	3.044e-07	RP11-492A10.1	0	ncRNA_intronic	1.586	6	9	15	0	0	0
8	5	113885693	rs2194872	113932996	rs425163	0.986595	rs414517	T	C	0.0536425	-3.74878	0.0001777	-5.12854	2.92e-07	RP11-492A10.1	0	ncRNA_intronic	2.279	6	9	15	0	0	0
8	5	113885693	rs2194872	113933075	rs2553524	0.986595	rs414517	A	G	0.0536425	-3.74878	0.0001777	-5.24451	1.567e-07	RP11-492A10.1	0	ncRNA_intronic	0.394	6	9	15	0	0	0
8	5	113885693	rs2194872	113937378	rs423278	0.986507	rs414517	A	C	0.0562073	-3.72709	0.0001937	-5.30707	1.114e-07	RP11-492A10.1	0	ncRNA_intronic	0.618		9	15	0	0	0
8	5	113885693	rs2194872	113937528	rs391735	0.991034	rs414517	C	T	0.0569955	-3.72041	0.0001989	-5.28647	1.247e-07	RP11-492A10.1	0	ncRNA_intronic	1.061	6	9	15	0	0	0
8	5	113885693	rs2194872	113938110	rs13157055	0.991034	rs414517	A	C	0.0564216	-3.72528	0.0001951	-5.38188	7.371e-08	RP11-492A10.1	0	ncRNA_intronic	1.48	7	9	15	0	0	0
8	5	113885693	rs2194872	113939418	rs410981	0.991034	rs414517	A	G	0.0579956	-3.71191	0.0002057	-5.39511	6.848e-08	RP11-492A10.1	0	ncRNA_intronic	12.19		9	15	0	0	0
8	5	113885693	rs2194872	113939575	rs383618	0.991034	rs414517	T	C	0.0581974	-3.71019	0.0002071	-5.38926	7.075e-08	RP11-492A10.1	0	ncRNA_intronic	1.254	6	9	15	0	0	0
8	5	113885693	rs2194872	113939984	rs372301	0.991034	rs414517	T	G	0.0597507	-3.69696	0.0002182	-5.35981	8.331e-08	RP11-492A10.1	0	ncRNA_intronic	1.015	7	9	15	0	0	0
8	5	113885693	rs2194872	113940965	rs391027	0.977518	rs414517	C	T	0.0709406	-3.60957	0.0003067	-5.49196	3.975e-08	RP11-492A10.1	0	ncRNA_intronic	0.518	6	9	15	0	0	0
8	5	113885693	rs2194872	113941714	rs405321	0.977518	rs414517	A	G	0.0715972	-3.60471	0.0003125	-5.52377	3.318e-08	RP11-492A10.1	0	ncRNA_intronic	0.096	6	9	15	0	0	0
8	5	113885693	rs2194872	113942381	rs373851	0.977518	rs414517	G	A	0.0711684	-3.60789	0.0003087	-5.48722	4.083e-08	RP11-492A10.1	0	ncRNA_intronic	1.796		9	15	0	0	0
8	5	113885693	rs2194872	113944202	rs376433	0.977518	rs414517	T	C	0.0705153	-3.61272	0.000303	-5.5	3.798e-08	RP11-492A10.1	0	ncRNA_intronic	2.647	7	9	15	0	0	0
8	5	113885693	rs2194872	113944968	rs394059	0.968614	rs414517	C	T	0.0676233	-3.63433	0.0002787	-5.45731	4.834e-08	RP11-492A10.1	0	ncRNA_intronic	4.717	7	9	15	0	0	0
8	5	113885693	rs2194872	113945187	rs381672	0.973055	rs414517	A	G	0.064925	-3.65578	0.0002564	-5.47877	4.283e-08	RP11-492A10.1	0	ncRNA_intronic	4.662	7	9	15	0	0	0
8	5	113885693	rs2194872	113945236	rs687573	0.973055	rs414517	G	A	0.0648998	-3.65598	0.0002562	-5.47729	4.319e-08	RP11-492A10.1	0	ncRNA_intronic	5.082		9	15	0	0	0
8	5	113885693	rs2194872	113946577	rs442699	0.977518	rs414517	G	A	0.0621052	-3.67808	0.000235	-5.46643	4.592e-08	RP11-492A10.1	0	ncRNA_intronic	3.672		9	15	0	0	0
8	5	113885693	rs2194872	113947137	rs2559994	0.977518	rs414517	A	G	0.0646462	-3.65799	0.0002542	-5.33391	9.612e-08	RP11-492A10.1	0	ncRNA_intronic	0.495	7	9	15	0	0	0
8	5	113885693	rs2194872	113951437	rs2553474	0.982009	rs414517	A	C	0.0633212	-3.66848	0.000244	-5.326	1.004e-07	RP11-492A10.1	0	ncRNA_intronic	1.14	7	9	15	0	0	0
8	5	113885693	rs2194872	113951564	rs2553475	0.982009	rs414517	C	T	0.0594079	-3.69988	0.0002157	-5.34523	9.03e-08	RP11-492A10.1	0	ncRNA_intronic	3.554	6	9	15	0	0	0
8	5	113885693	rs2194872	113952751	rs2681518	0.982009	rs414517	C	A	0.0588088	-3.70499	0.0002114	-5.3348	9.565e-08	RP11-492A10.1	0	ncRNA_intronic	2.212	7	9	15	0	0	0
8	5	113885693	rs2194872	113952806	rs2681519	0.982009	rs414517	G	A	0.0599274	-3.69545	0.0002195	-5.32618	1.003e-07	RP11-492A10.1	0	ncRNA_intronic	1.873	6	9	15	0	0	0
8	5	113885693	rs2194872	113953079	rs35591236	0.982009	rs414517	G	T	0.0631083	-3.67016	0.0002424	-5.31425	1.071e-07	RP11-492A10.1	0	ncRNA_intronic	3.254	6	9	15	0	0	0
8	5	113885693	rs2194872	113954895	rs1820383	0.968926	rs414517	C	T	0.0564063	-3.72541	0.000195	-5.21745	1.814e-07	RP11-492A10.1	0	ncRNA_intronic	1.169		9	15	0	0	0
8	5	113885693	rs2194872	113955028	rs1582705	0.968751	rs414517	G	A	0.0624476	-3.67538	0.0002375	-5.24147	1.593e-07	RP11-492A10.1	0	ncRNA_intronic	0.029		9	15	0	0	0
8	5	113885693	rs2194872	113957120	rs618550	0.964307	rs414517	G	A	0.0665972	-3.6425	0.00027	-5.38718	7.157e-08	RP11-492A10.1	0	ncRNA_intronic	3.44		9	15	0	0	0
8	5	113885693	rs2194872	113957246	rs686349	0.973064	rs414517	T	C	0.062434	-3.67548	0.0002374	-5.39968	6.676e-08	RP11-492A10.1	0	ncRNA_intronic	2.404	5	9	15	0	0	0
8	5	113885693	rs2194872	113957929	rs283784	0.964307	rs414517	C	T	0.0657596	-3.64916	0.0002631	-5.40217	6.584e-08	RP11-492A10.1	0	ncRNA_intronic	4.167		9	15	0	0	0
8	5	113885693	rs2194872	113958184	rs283783	0.968751	rs414517	G	A	0.0679123	-3.63203	0.0002812	-5.41579	6.102e-08	RP11-492A10.1	0	ncRNA_intronic	7.348		9	15	0	0	0
8	5	113885693	rs2194872	113960353	rs283781	0.977518	rs414517	C	A	0.0610416	-3.68645	0.0002274	-5.40691	6.412e-08	RP11-492A10.1	0	ncRNA_intronic	11.06		9	15	0	0	0
8	5	113885693	rs2194872	113961234	rs283780	0.973064	rs414517	G	A	0.0656611	-3.64994	0.0002623	-5.39807	6.736e-08	RP11-492A10.1	0	ncRNA_intronic	5.73		9	15	0	0	0
8	5	113885693	rs2194872	113962311	rs184016	0.973064	rs414517	T	C	0.0690389	-3.62363	0.0002905	-5.42477	5.803e-08	RP11-492A10.1	0	ncRNA_intronic	3.165		9	15	0	0	0
8	5	113885693	rs2194872	113962393	rs176114	0.973064	rs414517	G	A	0.0688453	-3.62505	0.0002889	-5.30302	1.139e-07	RP11-492A10.1	0	ncRNA_intronic	1.902		9	15	0	0	0
8	5	113885693	rs2194872	113963026	rs283778	0.973064	rs414517	T	G	0.0702366	-3.61478	0.0003006	-5.29503	1.19e-07	RP11-492A10.1	0	ncRNA_intronic	1.279		9	15	0	0	0
8	5	113885693	rs2194872	113964021	rs1834399	0.973064	rs414517	A	C	0.0697553	-3.61834	0.0002965	-5.40597	6.446e-08	RP11-492A10.1	0	ncRNA_intronic	3.641		9	15	0	0	0
8	5	113885693	rs2194872	113964166	rs2553491	0.973064	rs414517	T	C	0.069075	-3.62336	0.0002908	-5.2402	1.604e-07	RP11-492A10.1	0	ncRNA_intronic	7.648		9	15	0	0	0
8	5	113885693	rs2194872	113964348	rs2681523	0.973064	rs414517	C	T	0.0679123	-3.63203	0.0002812	-5.30238	1.143e-07	RP11-492A10.1	0	ncRNA_intronic	2.657	7	9	15	0	0	0
8	5	113885693	rs2194872	113964689	rs2553490	0.973064	rs414517	T	C	0.0706423	-3.61178	0.0003041	-5.30954	1.099e-07	RP11-492A10.1	0	ncRNA_intronic	0.38		9	15	0	0	0
8	5	113885693	rs2194872	113965104	rs2553489	0.920278	rs414517	T	C	0.0941497	-3.44879	0.0005631	-5.06236	4.141e-07	RP11-492A10.1	0	ncRNA_intronic	2.459		9	15	0	0	0
8	5	113885693	rs2194872	113965208	rs2162111	0.973064	rs414517	A	G	0.0794254	-3.54791	0.0003883	-5.38771	7.136e-08	RP11-492A10.1	0	ncRNA_intronic	8.135		9	15	0	0	0
8	5	113885693	rs2194872	113966115	rs1364933	0.973064	rs414517	G	A	0.0796879	-3.54609	0.000391	-5.43957	5.341e-08	RP11-492A10.1	0	ncRNA_intronic	13.08		9	15	0	0	0
8	5	113885693	rs2194872	113966604	rs1425546	0.973064	rs414517	T	C	0.070872	-3.61008	0.0003061	-5.46619	4.598e-08	RP11-492A10.1	0	ncRNA_intronic	0.444		9	15	0	0	0
8	5	113885693	rs2194872	113966673	rs1425545	0.973064	rs414517	T	C	0.0673201	-3.63675	0.0002761	-5.49889	3.822e-08	RP11-492A10.1	0	ncRNA_intronic	0.152		9	15	0	0	0
8	5	113885693	rs2194872	113966995	rs2176834	0.973064	rs414517	T	C	0.0745427	-3.58282	0.0003399	-5.38701	7.164e-08	RP11-492A10.1	0	ncRNA_intronic	3.5		9	15	0	0	0
8	5	113885693	rs2194872	113970777	rs1364932	0.911041	rs414517	G	A	0.091137	-3.46859	0.0005232	-5.10193	3.362e-07	RP11-492A10.1	0	ncRNA_intronic	3.365		9	15	0	0	0
8	5	113885693	rs2194872	113980074	rs2553477	0.891013	rs414517	G	A	0.0702715	-3.61452	0.0003009	-5.22979	1.697e-07	RP11-492A10.1	0	ncRNA_intronic	5.517		7	15	0	0	0
8	5	113885693	rs2194872	113986223	rs1364931	0.880284	rs414517	T	G	0.0713157	-3.6068	0.00031	-5.35264	8.668e-08	RP11-492A10.1	0	ncRNA_intronic	2.154	7	9	15	0	0	0
8	5	113890971	rs414517	113837198	rs1469249	0.879727	rs414517	A	G	0.0442366	-4.0499	5.124e-05	-3.82121	0.0001328	RP11-492A10.1	0	ncRNA_intronic	0.493	6	5	15	1	0	0
8	5	113890971	rs414517	113845984	rs434517	0.943689	rs414517	A	C	0.0466844	-4.24986	2.139e-05	-3.79778	0.000146	RP11-492A10.1	0	ncRNA_intronic	8.066		14	15	0	0	0
8	5	113890971	rs414517	113846546	rs405161	0.910619	rs414517	C	T	0.048259	-4.11606	3.854e-05	-3.78324	0.0001548	RP11-492A10.1	0	ncRNA_intronic	2.051	7	14	15	0	0	0
8	5	113890971	rs414517	113852982	rs427457	0.921163	rs414517	C	T	0.0272253	-4.03223	5.525e-05	-4.02747	5.638e-05	RP11-492A10.1	0	ncRNA_intronic	1.954	6	9	15	0	0	0
8	5	113890971	rs414517	113856194	rs624034	0.949207	rs414517	C	T	0.0262586	-4.13633	3.529e-05	-4.04212	5.297e-05	RP11-492A10.1	0	ncRNA_intronic	4.674		9	15	0	0	0
8	5	113890971	rs414517	113857058	rs11241282	0.933522	rs414517	G	T	0.0446011	-3.83259	0.0001268	-4.23338	2.302e-05	RP11-492A10.1	0	ncRNA_intronic	1.95	6	9	15	0	0	0
8	5	113890971	rs414517	113860627	rs2553520	0.822784	rs414517	C	T	0.0761065	-3.58888	0.0003321	-3.79107	0.00015	RP11-492A10.1	0	ncRNA_intronic	2.145	7	9	15	0	0	0
8	5	113890971	rs414517	113864076	rs605892	0.961568	rs414517	C	T	0.0463715	-3.81497	0.0001362	-4.34798	1.374e-05	RP11-492A10.1	0	ncRNA_intronic	4.142	6	9	15	0	0	0
8	5	113890971	rs414517	113865273	rs633531	0.961568	rs414517	C	T	0.0406741	-3.87143	0.0001082	-4.35676	1.32e-05	RP11-492A10.1	0	ncRNA_intronic	2.302		9	15	0	0	0
8	5	113890971	rs414517	113866285	rs1863312	0.971929	rs414517	C	T	0.0248768	-4.0614	4.878e-05	-4.29146	1.775e-05	RP11-492A10.1	0	ncRNA_intronic	0.497		15	15	0	0	0
8	5	113890971	rs414517	113866598	rs660001	0.983366	rs414517	A	G	0.0296996	-3.99645	6.43e-05	-4.3491	1.367e-05	RP11-492A10.1	0	ncRNA_intronic	0.07	7	15	15	0	0	0
8	5	113890971	rs414517	113867695	rs76252934	0.961568	rs414517	C	T	0.0409924	-3.86829	0.0001096	-4.34106	1.418e-05	RP11-492A10.1	0	ncRNA_intronic	1.95	6	9	15	0	0	0
8	5	113890971	rs414517	113870525	rs430198	0.971929	rs414517	C	T	0.0245739	-4.06584	4.786e-05	-4.31948	1.564e-05	RP11-492A10.1	0	ncRNA_intronic	3.65		9	15	0	0	0
8	5	113890971	rs414517	113871120	rs397787	0.971929	rs414517	T	C	0.0247721	-4.06293	4.846e-05	-4.34449	1.396e-05	RP11-492A10.1	0	ncRNA_intronic	1.453		9	15	0	0	0
8	5	113890971	rs414517	113871714	rs663338	0.988649	rs414517	T	C	0.0163334	-4.20197	2.646e-05	-4.27353	1.924e-05	RP11-492A10.1	0	ncRNA_intronic	1.815		9	15	0	0	0
8	5	113890971	rs414517	113872176	rs428202	0.994304	rs414517	A	G	0.0171241	-4.18729	2.823e-05	-4.25292	2.11e-05	RP11-492A10.1	0	ncRNA_intronic	0.234		8	15	0	0	0
8	5	113890971	rs414517	113873571	rs1834397	0.983366	rs414517	G	A	0.0303881	-3.98751	6.677e-05	-4.27043	1.951e-05	RP11-492A10.1	0	ncRNA_intronic	3.943		9	15	0	0	0
8	5	113890971	rs414517	113874012	rs392585	0.994304	rs414517	A	G	0.0173002	-4.18402	2.864e-05	-4.2241	2.399e-05	RP11-492A10.1	0	ncRNA_intronic	7.509		9	15	0	0	0
8	5	113890971	rs414517	113874137	rs860815	0.983366	rs414517	A	G	0.0313932	-3.97564	7.019e-05	-4.2842	1.834e-05	RP11-492A10.1	0	ncRNA_intronic	2.806		9	15	0	0	0
8	5	113890971	rs414517	113874167	rs1834396	0.983366	rs414517	C	A	0.0303881	-3.98751	6.677e-05	-4.27203	1.937e-05	RP11-492A10.1	0	ncRNA_intronic	14.32		9	15	0	0	0
8	5	113890971	rs414517	113874292	rs1425542	0.983366	rs414517	C	T	0.0302712	-3.9889	6.638e-05	-4.28947	1.791e-05	RP11-492A10.1	0	ncRNA_intronic	0.716		9	15	0	0	0
8	5	113890971	rs414517	113875160	rs406204	0.983366	rs414517	T	C	0.0301355	-3.99069	6.588e-05	-4.31807	1.574e-05	RP11-492A10.1	0	ncRNA_intronic	3.304	5	9	15	0	0	0
8	5	113890971	rs414517	113876796	rs2245999	0.961568	rs414517	C	T	0.0437066	-3.84147	0.0001223	-4.34894	1.368e-05	RP11-492A10.1	0	ncRNA_intronic	3.294	5	9	15	0	0	0
8	5	113890971	rs414517	113877071	rs453453	0.961568	rs414517	A	C	0.0402649	-3.87574	0.0001063	-4.31321	1.609e-05	RP11-492A10.1	0	ncRNA_intronic	3.95	7	9	15	0	0	0
8	5	113890971	rs414517	113880976	rs415875	0.994304	rs414517	A	G	0.0158821	-4.21033	2.55e-05	-4.25872	2.056e-05	RP11-492A10.1	0	ncRNA_intronic	3.752		5	15	0	0	0
8	5	113890971	rs414517	113890971	rs414517	1	rs414517	A	C	0.0155177	-4.23329	2.303e-05	-4.2452	2.184e-05	RP11-492A10.1	0	ncRNA_intronic	0.663	7	9	15	0	0	0
8	5	113890971	rs414517	113912779	rs1816165	0.971929	rs414517	C	T	0.0213869	-4.11374	3.893e-05	-4.50294	6.702e-06	RP11-492A10.1:CTC-313D10.1	0:0	ncRNA_intronic	0.955		9	15	0	0	0
8	5	113890971	rs414517	113913104	rs2553498	0.971929	rs414517	A	G	0.0210486	-4.11932	3.8e-05	-4.5253	6.031e-06	RP11-492A10.1:CTC-313D10.1	0:0	ncRNA_intronic	1.847		9	15	0	0	0
8	5	113890971	rs414517	113914542	rs421243	0.971929	rs414517	T	G	0.0197858	-4.14007	3.472e-05	-4.47838	7.521e-06	RP11-492A10.1:CTC-313D10.1	0:0	ncRNA_intronic	0.056		9	15	0	0	0
8	5	113890971	rs414517	113922636	rs395313	0.983035	rs414517	A	C	0.026236	-4.0419	5.302e-05	-4.36061	1.297e-05	RP11-492A10.1	0	ncRNA_intronic	1.019	6	9	15	0	0	0
8	5	113890971	rs414517	113923514	rs433405	0.96696	rs414517	C	T	0.0415728	-3.86257	0.0001122	-4.44547	8.77e-06	RP11-492A10.1	0	ncRNA_intronic	1.698		9	15	0	0	0
8	5	113890971	rs414517	113930626	rs367394	0.971936	rs414517	A	C	0.0404954	-3.87324	0.0001074	-4.27319	1.927e-05	RP11-492A10.1	0	ncRNA_intronic	4.954	7	9	15	0	0	0
8	5	113890971	rs414517	113935547	rs140580313	0.983035	rs414517	A	G	0.0316241	-3.97291	7.1e-05	-4.51019	6.477e-06	RP11-492A10.1	0	ncRNA_intronic	1.702	7	9	15	0	0	0
8	5	113890971	rs414517	113939280	rs375235	0.994304	rs414517	A	G	0.0225151	-4.09592	4.205e-05	-4.47269	7.724e-06	RP11-492A10.1	0	ncRNA_intronic	2.534		9	15	0	0	0
8	5	113890971	rs414517	113941876	rs387390	0.940379	rs414517	G	T	0.0602786	-3.69245	0.0002221	-4.7322	2.221e-06	RP11-492A10.1	0	ncRNA_intronic	1.016	7	9	15	0	0	0
8	5	113890971	rs414517	113943639	rs397951	0.955565	rs414517	A	C	0.035205	-3.93041	8.48e-05	-4.6957	2.657e-06	RP11-492A10.1	0	ncRNA_intronic	0.89		9	15	0	0	0
8	5	113890971	rs414517	113974833	rs2553484	0.785755	rs414517	A	C	0.0483779	-3.79659	0.0001467	-4.09042	4.306e-05	RP11-492A10.1	0	ncRNA_intronic	4.378		9	15	0	0	0
8	5	113890971	rs414517	113975902	rs2217019	0.787981	rs414517	C	T	0.0463897	-3.81479	0.0001363	-4.06721	4.758e-05	RP11-492A10.1	0	ncRNA_intronic	0.342		9	15	0	0	0
8	5	113890971	rs414517	113977802	rs71579462	0.857387	rs414517	G	A	0.0406054	-3.8721	0.0001079	-4.30578	1.664e-05	RP11-492A10.1	0	ncRNA_intronic	5.418	6	9	15	0	0	0
8	5	113890971	rs414517	113978216	rs993270	0.862056	rs414517	T	C	0.03281	-3.95885	7.531e-05	-4.35233	1.347e-05	RP11-492A10.1	0	ncRNA_intronic	3.68		9	15	0	0	0
8	5	113890971	rs414517	113978616	rs2553482	0.862056	rs414517	C	T	0.0326625	-3.96061	7.476e-05	-4.30967	1.635e-05	RP11-492A10.1	0	ncRNA_intronic	0.338		9	15	0	0	0
8	5	113890971	rs414517	113979140	rs2553481	0.858448	rs414517	T	C	0.0335343	-3.95025	7.807e-05	-4.34512	1.392e-05	RP11-492A10.1	0	ncRNA_intronic	3.724		9	15	0	0	0
8	5	113890971	rs414517	113979240	rs2553480	0.858448	rs414517	A	G	0.0371342	-3.90965	9.243e-05	-4.34974	1.363e-05	RP11-492A10.1	0	ncRNA_intronic	6.029		9	15	0	0	0
8	5	113890971	rs414517	113979519	rs1820381	0.85383	rs414517	T	C	0.0317681	-3.97121	7.151e-05	-4.33359	1.467e-05	RP11-492A10.1	0	ncRNA_intronic	0.048		9	15	0	0	0
8	5	113890971	rs414517	113979580	rs1820380	0.858448	rs414517	A	G	0.0376893	-3.90366	9.475e-05	-4.3722	1.23e-05	RP11-492A10.1	0	ncRNA_intronic	2.256		9	15	0	0	0
8	5	113890971	rs414517	113981038	rs2553521	0.856458	rs414517	A	G	0.0388206	-3.89142	9.966e-05	-4.31737	1.579e-05	RP11-492A10.1	0	ncRNA_intronic	0.223		9	15	0	0	0
8	5	113890971	rs414517	113981546	rs2681529	0.805156	rs414517	C	T	0.0416828	-3.86148	0.0001127	-4.28023	1.867e-05	RP11-492A10.1	0	ncRNA_intronic	8.74	7	9	15	0	0	0
8	5	113890971	rs414517	113982341	rs992417	0.84622	rs414517	A	G	0.0455397	-3.82326	0.0001317	-4.34814	1.373e-05	RP11-492A10.1	0	ncRNA_intronic	1.576		9	15	0	0	0
8	5	113890971	rs414517	113984242	rs283777	0.840691	rs414517	A	C	0.0380201	-3.90008	9.616e-05	-4.34782	1.375e-05	RP11-492A10.1	0	ncRNA_intronic	0.296		14	15	0	0	0
8	5	113890971	rs414517	113984474	rs2681530	0.840691	rs414517	T	C	0.0381153	-3.89905	9.657e-05	-4.23713	2.264e-05	RP11-492A10.1	0	ncRNA_intronic	5.425	6	14	15	0	0	0
8	5	113890971	rs414517	113984477	rs2681531	0.840691	rs414517	A	G	0.0381153	-3.89905	9.657e-05	-4.2257	2.382e-05	RP11-492A10.1	0	ncRNA_intronic	1.991	6	14	15	0	0	0
8	5	113890971	rs414517	113984556	rs283776	0.840691	rs414517	T	C	0.038861	-3.89098	9.984e-05	-4.32447	1.529e-05	RP11-492A10.1	0	ncRNA_intronic	0.052		14	15	0	0	0
8	5	113890971	rs414517	113985348	rs283774	0.837205	rs414517	A	G	0.0417486	-3.86084	0.000113	-4.31821	1.573e-05	RP11-492A10.1	0	ncRNA_intronic	1.79		7	15	0	0	0
8	5	113890971	rs414517	113986250	rs169534	0.833828	rs414517	A	G	0.0616616	-3.68157	0.0002318	-4.41438	1.013e-05	RP11-492A10.1	0	ncRNA_intronic	0.417		9	15	0	0	0
8	5	113890971	rs414517	113986346	rs176113	0.833828	rs414517	A	G	0.0605397	-3.6904	0.0002239	-4.37026	1.241e-05	RP11-492A10.1	0	ncRNA_intronic	3.27		9	15	0	0	0
8	5	113890971	rs414517	113987780	rs17669543	0.830784	rs414517	A	G	0.0511114	-3.77161	0.0001622	-4.33075	1.486e-05	RP11-492A10.1	0	ncRNA_intronic	4.583	5	9	15	0	0	0
8	5	113890971	rs414517	113987898	rs1402025	0.841801	rs414517	C	T	0.0502072	-3.77989	0.0001569	-4.29109	1.778e-05	RP11-492A10.1	0	ncRNA_intronic	4.085		9	15	0	0	0
8	5	113890971	rs414517	113988893	rs12514965	0.783546	rs414517	C	T	0.0494153	-3.78713	0.0001524	-4.38144	1.179e-05	RP11-492A10.1	0	ncRNA_intronic	3.294	7	9	15	0	0	0
8	5	113890971	rs414517	113992200	rs7734063	0.85383	rs414517	G	A	0.0299574	-3.99305	6.523e-05	-4.0895	4.323e-05	RP11-492A10.1	0	ncRNA_intronic	8.314	7	9	15	0	0	0
8	5	113890971	rs414517	113995001	rs285892	0.81713	rs414517	C	T	0.0330543	-3.95595	7.623e-05	-4.11197	3.923e-05	RP11-492A10.1	0	ncRNA_intronic	3.461		5	15	0	0	0
9	6	98585502	rs17814604	98585502	rs17814604	1	rs2388334	G	A	0.00542018	4.51329	6.383e-06	7.50037	6.364e-14	RP11-436D23.1	0	ncRNA_intronic	21.4	5	5	15	0	0	0
9	6	98591622	rs2388334	98547979	rs9385269	0.871564	rs2388334	C	T	0.0136	-4.2585	2.058e-05	-10.539	5.709e-26	RP11-436D23.1	0	ncRNA_intronic	3.137	7	9	15	0	0	0
9	6	98591622	rs2388334	98549801	rs9401593	0.988112	rs2388334	A	C	0.00320069	-4.64245	3.443e-06	-11.4447	2.499e-30	RP11-436D23.1	0	ncRNA_intronic	1.204	7	9	15	0	0	0
9	6	98591622	rs2388334	98550289	rs1906252	0.984151	rs2388334	C	A	0.0027585	-4.67672	2.915e-06	-11.5489	7.477e-31	RP11-436D23.1	0	ncRNA_intronic	0.052		9	15	0	0	0
9	6	98591622	rs2388334	98553894	rs1487441	0.984117	rs2388334	G	A	0.00289957	-4.66581	3.074e-06	-11.4983	1.345e-30	RP11-436D23.1	0	ncRNA_intronic	0.359	7	5	15	0	0	0
9	6	98591622	rs2388334	98555272	rs9375188	0.988112	rs2388334	C	T	0.00246223	-4.70393	2.552e-06	-11.4391	2.665e-30	RP11-436D23.1	0	ncRNA_intronic	1.721	6	5	15	0	0	0
9	6	98591622	rs2388334	98562720	rs9375195	0.881788	rs2388334	G	A	0.0121493	-4.29272	1.765e-05	-10.5757	3.861e-26	RP11-436D23.1	0	ncRNA_intronic	1.98	6	5	15	0	0	0
9	6	98591622	rs2388334	98565211	rs1487445	0.992075	rs2388334	C	T	0.00193459	-4.75854	1.95e-06	-11.2196	3.269e-29	RP11-436D23.1	0	ncRNA_intronic	3.269	5	7	15	0	0	0
9	6	98591622	rs2388334	98572120	rs10457441	0.90957	rs2388334	T	C	0.0099926	-4.34926	1.366e-05	-10.4084	2.269e-25	RP11-436D23.1	0	ncRNA_intronic	0.998	4	5	15	0	0	0
9	6	98591622	rs2388334	98572976	rs13208578	0.90957	rs2388334	C	T	0.0099698	-4.3499	1.362e-05	-10.3187	5.802e-25	RP11-436D23.1	0	ncRNA_intronic	13.04	5	7	15	0	0	0
9	6	98591622	rs2388334	98574560	rs968050	1	rs2388334	C	T	0.00192636	-4.75947	1.941e-06	-11.2855	1.547e-29	RP11-436D23.1	0	ncRNA_intronic	6.008		5	15	0	0	0
9	6	98591622	rs2388334	98576223	rs12202969	1	rs2388334	G	A	0.00160861	-4.79945	1.591e-06	-11.3531	7.157e-30	RP11-436D23.1	0	ncRNA_intronic	1.218	6	5	15	0	0	0
9	6	98591622	rs2388334	98576688	rs1872841	0.906169	rs2388334	C	A	0.00844124	-4.39632	1.101e-05	-10.3769	3.159e-25	RP11-436D23.1	0	ncRNA_intronic	0.738	6	5	15	0	0	0
9	6	98591622	rs2388334	98577689	rs9372734	1	rs2388334	C	T	0.00161043	-4.7992	1.593e-06	-11.2503	2.308e-29	RP11-436D23.1	0	ncRNA_intronic	0.114	6	5	15	0	0	0
9	6	98591622	rs2388334	98578511	rs9401634	0.90957	rs2388334	T	C	0.00864776	-4.38952	1.136e-05	-10.3642	3.606e-25	RP11-436D23.1	0	ncRNA_intronic	7.633	6	5	15	0	0	0
9	6	98591622	rs2388334	98579481	rs12204181	0.90957	rs2388334	T	C	0.00860697	-4.39087	1.129e-05	-10.3605	3.75e-25	RP11-436D23.1	0	ncRNA_intronic	7.468	7	5	15	0	0	0
9	6	98591622	rs2388334	98582900	rs12206087	1	rs2388334	G	A	0.00153009	-4.81031	1.507e-06	-11.3231	1.008e-29	RP11-436D23.1	0	ncRNA_intronic	5.731	7	5	15	0	0	0
9	6	98591622	rs2388334	98588754	rs9375225	0.90957	rs2388334	G	T	0.00699083	-4.44722	8.699e-06	-10.3615	3.712e-25	RP11-436D23.1	0	ncRNA_intronic	0.137	6	5	15	0	0	0
9	6	98591622	rs2388334	98591622	rs2388334	1	rs2388334	A	G	0.00105169	-4.89085	1.004e-06	-11.2089	3.688e-29	RP11-436D23.1	0	ncRNA_intronic	5.756	7	5	15	0	0	0
10	7	104849737	rs7794285	104786593	rs2074753	0.944047	rs7794285	T	C	0.0666571	3.64203	0.0002705	-4.30698	1.655e-05	SRPK2	0	intronic	1.264	2b	4	5	1	0	0
10	7	104849737	rs7794285	104787971	rs6967753	0.944047	rs7794285	T	C	0.0636641	3.66577	0.0002466	-4.09869	4.155e-05	SRPK2	0	intronic	7.61	7	4	5	1	0	0
10	7	104849737	rs7794285	104791075	rs2299305	0.94449	rs7794285	A	G	0.0746559	3.58198	0.000341	-4.34308	1.405e-05	SRPK2	0	intronic	2.794	7	4	5	1	0	0
10	7	104849737	rs7794285	104813097	rs17640472	0.940318	rs7794285	T	C	0.0773805	3.5621	0.0003679	-4.44908	8.624e-06	SRPK2	0	intronic	3.46	5	5	5	1	0	0
10	7	104849737	rs7794285	104821264	rs6949830	0.947887	rs7794285	T	C	0.077678	3.56004	0.0003708	-4.20962	2.558e-05	SRPK2	0	intronic	5.491	7	4	15	1	0	0
10	7	104849737	rs7794285	104824547	rs112142930	0.947887	rs7794285	G	A	0.0726576	3.59685	0.0003221	-4.19021	2.787e-05	SRPK2	0	intronic	0.331	6	4	15	1	0	0
10	7	104849737	rs7794285	104827528	rs55671517	0.947887	rs7794285	A	G	0.0707458	3.61102	0.000305	-4.17369	2.997e-05	SRPK2	0	intronic	5.737	6	2	15	1	0	0
10	7	104849737	rs7794285	104830695	rs1010340	0.93612	rs7794285	T	C	0.0929306	3.45681	0.0005466	-4.34958	1.364e-05	SRPK2	0	intronic	3.081	5	4	5	1	0	0
10	7	104849737	rs7794285	104834293	rs6974874	0.94449	rs7794285	A	G	0.0699204	3.61712	0.0002979	-4.58703	4.496e-06	SRPK2	0	intronic	2.075	6	4	5	1	0	0
10	7	104849737	rs7794285	104837009	rs6949073	0.947887	rs7794285	G	A	0.0865229	3.49872	0.0004675	-4.42966	9.438e-06	SRPK2	0	intronic	1.127	4	2	5	1	0	0
10	7	104849737	rs7794285	104838050	rs7796945	0.947887	rs7794285	G	A	0.0721755	3.60042	0.0003177	-4.41793	9.965e-06	SRPK2	0	intronic	0.625	6	4	5	1	0	0
10	7	104849737	rs7794285	104838876	rs2299309	0.947887	rs7794285	T	C	0.0852568	3.50717	0.0004529	-4.43658	9.14e-06	SRPK2	0	intronic	1.875	4	2	5	1	0	0
10	7	104849737	rs7794285	104842643	rs17640508	0.947887	rs7794285	G	A	0.0823358	3.52763	0.0004193	-4.43847	9.06e-06	SRPK2	0	intronic	2.006	5	4	5	1	0	0
10	7	104849737	rs7794285	104842960	rs6972563	0.947887	rs7794285	T	C	0.0879701	3.48929	0.0004843	-4.43809	9.076e-06	SRPK2	0	intronic	2.791	6	4	5	1	0	0
10	7	104849737	rs7794285	104846173	rs55712418	0.951327	rs7794285	A	G	0.0920972	3.46229	0.0005356	-4.28335	1.841e-05	SRPK2	0	intronic	4.78	5	4	5	1	0	0
10	7	104849737	rs7794285	104846634	rs56269269	0.951327	rs7794285	G	A	0.0873905	3.49307	0.0004775	-4.29234	1.768e-05	SRPK2	0	intronic	0.362	5	4	5	1	0	0
10	7	104849737	rs7794285	104849737	rs7794285	1	rs7794285	A	G	0.0333634	3.95228	7.741e-05	-4.45724	8.302e-06	SRPK2	0	intronic	0.647	7	2	5	1	0	0
10	7	104849737	rs7794285	104858640	rs60358227	0.899513	rs7794285	A	G	0.0818355	3.53112	0.0004138	-4.33721	1.443e-05	SRPK2	0	intronic	4.513	4	1	15	1	0	0
10	7	104849737	rs7794285	104859435	rs12154942	0.899513	rs7794285	T	C	0.0814304	3.53395	0.0004094	-4.57479	4.767e-06	SRPK2	0	intronic	0.466	6	2	5	1	0	0
10	7	104849737	rs7794285	104860671	rs67421818	0.899513	rs7794285	T	G	0.0844278	3.51299	0.0004431	-4.3013	1.698e-05	SRPK2	0	intronic	4.358	7	4	5	1	0	0
10	7	104849737	rs7794285	104870448	rs7794036	0.947887	rs7794285	T	C	0.0789145	3.55146	0.0003831	-4.40456	1.06e-05	SRPK2	0	intronic	0.272	4	2	5	1	0	0
10	7	104849737	rs7794285	104872893	rs57423264	0.947887	rs7794285	C	T	0.0838765	3.51685	0.0004367	-4.24082	2.227e-05	SRPK2	0	intronic	0.318	6	4	5	1	0	0
10	7	104849737	rs7794285	104877373	rs6950104	0.947887	rs7794285	G	A	0.0799679	3.54414	0.0003939	-4.48478	7.299e-06	SRPK2	0	intronic	6.499	5	5	5	1	0	0
10	7	104849737	rs7794285	104878705	rs73186025	0.947887	rs7794285	C	T	0.0764001	3.56896	0.0003584	-4.27249	1.933e-05	SRPK2	0	intronic	0.605	7	5	7	1	0	0
10	7	104849737	rs7794285	104880551	rs6966539	0.947887	rs7794285	G	A	0.0833523	3.52052	0.0004307	-4.30013	1.707e-05	SRPK2	0	intronic	1.534	7	4	5	1	0	0
10	7	104849737	rs7794285	104882025	rs66790006	0.947887	rs7794285	G	A	0.0823268	3.52769	0.0004192	-4.24966	2.141e-05	SRPK2	0	intronic	1.959	5	2	5	1	0	0
10	7	104849737	rs7794285	104886669	rs7776832	0.947887	rs7794285	T	C	0.076558	3.56779	0.00036	-4.43566	9.179e-06	SRPK2	0	intronic	3.524	4	2	7	1	0	0
10	7	104849737	rs7794285	104893335	rs67505443	0.947887	rs7794285	C	T	0.0799968	3.54394	0.0003942	-4.18118	2.9e-05	SRPK2	0	intronic	1.742	7	5	5	1	0	0
10	7	104849737	rs7794285	104896470	rs12538590	0.947887	rs7794285	C	A	0.086558	3.49849	0.0004679	-4.4362	9.156e-06	SRPK2	0	intronic	2.024	5	5	5	1	0	0
10	7	104849737	rs7794285	104896865	rs6466048	0.947887	rs7794285	C	T	0.0792199	3.54934	0.0003862	-4.15647	3.232e-05	SRPK2	0	intronic	4.61	7	3	5	1	0	0
10	7	104849737	rs7794285	104896929	rs6466049	0.947887	rs7794285	A	G	0.0791904	3.54954	0.0003859	-4.41994	9.873e-06	SRPK2	0	intronic	2.528	7	3	5	1	0	0
10	7	104849737	rs7794285	104897059	rs6466050	0.947887	rs7794285	T	C	0.0836153	3.51868	0.0004337	-4.18009	2.914e-05	SRPK2	0	intronic	5.041	6	3	5	1	0	0
10	7	104849737	rs7794285	104897225	rs6466051	0.947887	rs7794285	G	A	0.0802459	3.5422	0.0003968	-4.41545	1.008e-05	SRPK2	0	intronic	6.046	5	2	7	1	0	0
10	7	104849737	rs7794285	104897964	rs2079340	0.947887	rs7794285	G	A	0.085482	3.50559	0.0004556	-4.3997	1.084e-05	SRPK2	0	intronic	6.003	4	2	7	1	0	0
10	7	104849737	rs7794285	104898648	rs111392576	0.947887	rs7794285	G	A	0.0841876	3.51467	0.0004403	-4.14813	3.352e-05	SRPK2	0	intronic	1.463	7	2	5	1	0	0
10	7	104849737	rs7794285	104898716	rs6968335	0.947887	rs7794285	C	T	0.0831405	3.522	0.0004283	-4.14454	3.405e-05	SRPK2	0	intronic	1.469	7	2	5	1	0	0
10	7	104849737	rs7794285	104899564	rs6955753	0.947887	rs7794285	T	G	0.083405	3.52015	0.0004313	-4.13061	3.618e-05	SRPK2	0	intronic	0.136	7	5	5	1	0	0
10	7	104849737	rs7794285	104900257	rs4605996	0.947887	rs7794285	T	C	0.076558	3.56779	0.00036	-4.13093	3.613e-05	SRPK2	0	intronic	8.132	6	5	5	1	0	0
10	7	104849737	rs7794285	104903641	rs112675813	0.947887	rs7794285	G	A	0.0805597	3.54002	0.0004001	-4.09411	4.238e-05	SRPK2	0	intronic	0.006	7	3	5	1	0	0
10	7	104849737	rs7794285	104903659	rs4580973	0.947887	rs7794285	A	G	0.0805218	3.54028	0.0003997	-4.06092	4.888e-05	SRPK2	0	intronic	4.885	6	3	5	1	0	0
10	7	104849737	rs7794285	104904235	rs2079341	0.943728	rs7794285	A	C	0.0751052	3.57863	0.0003454	-4.40415	1.062e-05	SRPK2	0	intronic	1.486	6	3	5	1	0	0
10	7	104849737	rs7794285	104904868	rs3801279	0.947887	rs7794285	C	T	0.08524	3.50729	0.0004527	-4.4007	1.079e-05	SRPK2	0	intronic	0.56		1	5	1	0	0
10	7	104849737	rs7794285	104905252	rs2299327	0.947887	rs7794285	C	T	0.0794644	3.54764	0.0003887	-4.32869	1.5e-05	SRPK2	0	intronic	1.771	5	2	5	1	0	0
10	7	104849737	rs7794285	104905277	rs6945585	0.944047	rs7794285	T	G	0.0787062	3.55291	0.000381	-4.28947	1.791e-05	SRPK2	0	intronic	2.212	5	2	5	1	0	0
10	7	104849737	rs7794285	104911576	rs17640599	0.947887	rs7794285	T	C	0.083405	3.52015	0.0004313	-4.40394	1.063e-05	SRPK2	0	intronic	9.39	4	5	15	1	0	0
10	7	104849737	rs7794285	104911827	rs55949446	0.947887	rs7794285	C	T	0.083659	3.51837	0.0004342	-4.13381	3.568e-05	SRPK2	0	intronic	5.827	5	5	15	1	0	0
10	7	104849737	rs7794285	104913228	rs17707878	0.947887	rs7794285	G	A	0.0823629	3.52744	0.0004196	-4.41247	1.022e-05	SRPK2	0	intronic	4.509	5	5	15	1	0	0
10	7	104849737	rs7794285	104913947	rs56281713	0.943728	rs7794285	A	G	0.0760857	3.57131	0.0003552	-4.12677	3.679e-05	SRPK2	0	intronic	1.16	7	5	15	1	0	0
10	7	104849737	rs7794285	104914779	rs7802568	0.947887	rs7794285	T	C	0.0805218	3.54028	0.0003997	-4.13777	3.507e-05	SRPK2	0	intronic	4.539	2c	5	15	1	0	0
10	7	104849737	rs7794285	104915462	rs6954830	0.947887	rs7794285	A	G	0.0794644	3.54764	0.0003887	-4.16858	3.065e-05	SRPK2	0	intronic	0.152	4	5	15	1	0	0
10	7	104849737	rs7794285	104915625	rs6955133	0.947887	rs7794285	A	G	0.0802745	3.542	0.0003971	-4.59059	4.42e-06	SRPK2	0	intronic	0.697	6	5	15	1	0	0
10	7	104849737	rs7794285	104916166	rs7808226	0.947887	rs7794285	T	C	0.0833962	3.52021	0.0004312	-4.4246	9.662e-06	SRPK2	0	intronic	4.24	5	4	15	1	0	0
10	7	104849737	rs7794285	104917585	rs7782827	0.947887	rs7794285	G	A	0.0794644	3.54764	0.0003887	-4.16585	3.102e-05	SRPK2	0	intronic	0.506	6	4	15	1	0	0
10	7	104849737	rs7794285	104917675	rs7801685	0.947887	rs7794285	T	C	0.0815321	3.53324	0.0004105	-4.32032	1.558e-05	SRPK2	0	intronic	2.136	7	4	15	1	0	0
10	7	104849737	rs7794285	104918169	rs17640644	0.947887	rs7794285	A	G	0.0800064	3.54387	0.0003943	-4.44875	8.637e-06	SRPK2	0	intronic	2.253	4	4	15	1	0	0
10	7	104849737	rs7794285	104918313	rs4406343	0.947887	rs7794285	G	A	0.0753882	3.57652	0.0003482	-4.40827	1.042e-05	SRPK2	0	intronic	2.592	7	5	15	1	0	0
10	7	104849737	rs7794285	104918588	rs6954293	0.947887	rs7794285	A	C	0.0792297	3.54927	0.0003863	-4.16992	3.047e-05	SRPK2	0	intronic	1.787	7	5	15	1	0	0
10	7	104849737	rs7794285	104919085	rs113743347	0.947887	rs7794285	A	G	0.0794936	3.54744	0.000389	-4.16184	3.157e-05	SRPK2	0	intronic	0.554	7	5	15	1	0	0
10	7	104849737	rs7794285	104920741	rs1135958	0.947887	rs7794285	C	A	0.0854238	3.506	0.0004549	-4.18842	2.809e-05	SRPK2	0	intronic	0.537	6	5	15	1	0	1
10	7	104849737	rs7794285	104920776	rs7797988	0.947887	rs7794285	C	T	0.0851479	3.50793	0.0004516	-4.18834	2.81e-05	SRPK2	0	intronic	0.645	7	5	15	1	0	1
10	7	104849737	rs7794285	104922022	rs1468359	0.947887	rs7794285	C	A	0.0879023	3.48973	0.0004835	-4.45864	8.248e-06	SRPK2	0	intronic	0.724	7	5	15	1	0	1
10	7	104849737	rs7794285	104922603	rs12532134	0.947887	rs7794285	G	A	0.0838418	3.51709	0.0004363	-4.3747	1.216e-05	SRPK2	0	intronic	2.46	6	5	15	1	0	1
10	7	104849737	rs7794285	104922624	rs12537196	0.947887	rs7794285	A	G	0.0799583	3.5442	0.0003938	-4.37398	1.22e-05	SRPK2	0	intronic	5.885	7	5	15	1	0	1
10	7	104849737	rs7794285	104922834	rs12532188	0.947887	rs7794285	G	A	0.0838418	3.51709	0.0004363	-4.45113	8.542e-06	SRPK2	0	intronic	3.495	6	5	15	1	0	1
10	7	104849737	rs7794285	104922944	rs12532201	0.947887	rs7794285	G	A	0.0799487	3.54427	0.0003937	-4.17722	2.951e-05	SRPK2	0	intronic	4.537	7	5	15	1	0	1
10	7	104849737	rs7794285	104923134	rs12537307	0.947887	rs7794285	A	G	0.0838592	3.51697	0.0004365	-4.20214	2.644e-05	SRPK2	0	intronic	3.462	7	5	15	1	0	1
10	7	104849737	rs7794285	104923185	rs12532268	0.944171	rs7794285	G	A	0.0751154	3.57855	0.0003455	-4.22195	2.422e-05	SRPK2	0	intronic	2.158	7	5	15	1	0	1
10	7	104849737	rs7794285	104923811	rs6963624	0.947887	rs7794285	T	C	0.0799583	3.5442	0.0003938	-4.45779	8.281e-06	SRPK2	0	intronic	0.204	6	5	15	1	0	1
10	7	104849737	rs7794285	104925921	rs6954777	0.947887	rs7794285	G	A	0.083659	3.51837	0.0004342	-4.20027	2.666e-05	SRPK2	0	intronic	0.915	7	5	15	1	0	1
10	7	104849737	rs7794285	104925970	rs6954421	0.947887	rs7794285	A	C	0.0839112	3.51661	0.0004371	-4.45103	8.546e-06	SRPK2	0	intronic	4.261	6	5	15	1	0	1
10	7	104849737	rs7794285	104926183	rs6954844	0.947887	rs7794285	A	G	0.0818446	3.53106	0.0004139	-4.44818	8.66e-06	SRPK2	0	intronic	4.858	5	5	15	1	0	1
10	7	104849737	rs7794285	104930875	rs66469172	0.947887	rs7794285	G	A	0.0862855	3.50026	0.0004648	-4.0791	4.521e-05	SRPK2	0	intronic	3.071	5	5	15	1	0	1
10	7	104849737	rs7794285	104930898	rs73186054	0.947887	rs7794285	C	T	0.0862855	3.50026	0.0004648	-4.10121	4.11e-05	SRPK2	0	intronic	2.12	5	5	15	1	0	1
10	7	104849737	rs7794285	104931545	rs7790653	0.947887	rs7794285	A	C	0.0844193	3.51305	0.000443	-4.45146	8.529e-06	SRPK2	0	intronic	2.608	5	5	15	1	0	1
10	7	104849737	rs7794285	104932114	rs6958609	0.94449	rs7794285	C	T	0.0856993	3.50407	0.0004582	-4.1841	2.863e-05	SRPK2	0	intronic	0.101	7	5	15	1	0	1
10	7	104849737	rs7794285	104932821	rs6963661	0.947887	rs7794285	G	A	0.0792297	3.54927	0.0003863	-4.47322	7.705e-06	SRPK2	0	intronic	0.16	7	5	15	1	0	1
10	7	104849737	rs7794285	104932936	rs7796274	0.947887	rs7794285	A	G	0.0836415	3.5185	0.000434	-4.1934	2.748e-05	SRPK2	0	intronic	0.265	7	5	15	1	0	1
10	7	104849737	rs7794285	104933590	rs56338352	0.947887	rs7794285	C	T	0.0862326	3.50061	0.0004642	-4.21725	2.473e-05	SRPK2	0	intronic	0.338	6	5	15	1	0	1
10	7	104849737	rs7794285	104934281	rs67154126	0.947887	rs7794285	A	G	0.0828207	3.52424	0.0004247	-4.14998	3.325e-05	SRPK2	0	intronic	0.263	5	5	15	1	0	1
10	7	104849737	rs7794285	104934662	rs7805928	0.947887	rs7794285	A	G	0.084179	3.51473	0.0004402	-4.48199	7.395e-06	SRPK2	0	intronic	2.363	7	2	15	1	0	1
10	7	104849737	rs7794285	104935134	rs6974890	0.947887	rs7794285	G	A	0.0841704	3.51479	0.0004401	-4.20997	2.554e-05	SRPK2	0	intronic	0.056	7	4	15	1	0	1
10	7	104849737	rs7794285	104935248	rs6974780	0.947887	rs7794285	C	T	0.0841704	3.51479	0.0004401	-4.23842	2.251e-05	SRPK2	0	intronic	0.287	6	5	15	1	0	1
10	7	104849737	rs7794285	104935552	rs6978954	0.947887	rs7794285	A	G	0.0823539	3.5275	0.0004195	-4.21435	2.505e-05	SRPK2	0	intronic	0.244	6	5	15	1	0	1
10	7	104849737	rs7794285	104936469	rs7780006	0.947887	rs7794285	C	T	0.0849459	3.50935	0.0004492	-4.48745	7.208e-06	SRPK2	0	intronic	0.646	5	2	15	1	0	1
10	7	104849737	rs7794285	104937147	rs66912872	0.947887	rs7794285	A	G	0.0831317	3.52206	0.0004282	-4.22504	2.389e-05	SRPK2	0	intronic	3.569	4	5	15	1	0	1
10	7	104849737	rs7794285	104941237	rs112510244	0.947887	rs7794285	A	C	0.0865229	3.49872	0.0004675	-4.21372	2.512e-05	SRPK2	0	intronic	0.213	5	5	15	1	0	1
10	7	104849737	rs7794285	104941798	rs12155184	0.947887	rs7794285	G	A	0.081569	3.53298	0.0004109	-4.28359	1.839e-05	SRPK2	0	intronic	0.425	5	4	15	1	0	1
10	7	104849737	rs7794285	104943302	rs12155351	0.947887	rs7794285	C	T	0.0909486	3.46982	0.0005208	-4.5052	6.631e-06	SRPK2	0	intronic	1.673	7	5	15	1	0	1
10	7	104849737	rs7794285	104947195	rs12534381	0.916467	rs7794285	T	C	0.0992446	3.41698	0.0006332	-4.32766	1.507e-05	SRPK2	0	intronic	9.028	7	2	15	1	0	1
10	7	104849737	rs7794285	104951038	rs67162771	0.947887	rs7794285	C	T	0.0839372	3.51643	0.0004374	-4.3249	1.526e-05	SRPK2	0	intronic	0.067	7	5	15	1	0	1
10	7	104849737	rs7794285	104956516	rs56251298	0.916467	rs7794285	G	T	0.0942152	3.44836	0.000564	-4.09735	4.179e-05	SRPK2	0	intronic	0.396	7	5	15	1	0	1
10	7	104849737	rs7794285	104959297	rs17708070	0.912425	rs7794285	G	A	0.0953053	3.44117	0.0005792	-4.17158	3.025e-05	SRPK2	0	intronic	2.068	7	5	15	1	0	1
10	7	104849737	rs7794285	104961873	rs10953475	0.912849	rs7794285	T	C	0.0944977	3.4465	0.0005679	-4.40973	1.035e-05	SRPK2	0	intronic	0.978	6	5	15	1	0	0
10	7	104849737	rs7794285	105005566	rs12530690	0.916467	rs7794285	C	A	0.0962697	3.43516	0.0005922	-4.13342	3.574e-05	SRPK2	0	intronic	0.336	5	4	15	1	0	0
10	7	104849737	rs7794285	105009612	rs7792628	0.916467	rs7794285	G	A	0.0948498	3.44418	0.0005728	-4.03058	5.564e-05	SRPK2	0	intronic	1.081	6	5	15	1	0	0
10	7	104849737	rs7794285	105010435	rs12533264	0.916467	rs7794285	T	C	0.0948928	3.44389	0.0005734	-4.04341	5.268e-05	SRPK2	0	intronic	2.713	6	5	15	1	0	0
10	7	104849737	rs7794285	105010684	rs17342493	0.916467	rs7794285	G	A	0.0998719	3.41314	0.0006422	-4.0404	5.336e-05	SRPK2	0	intronic	2.502	3a	5	15	1	0	0
10	7	104849737	rs7794285	105017977	rs113474944	0.916467	rs7794285	T	C	0.0945842	3.44593	0.0005691	-4.18842	2.809e-05	SRPK2	0	intronic	2.698	6	5	15	1	0	0
10	7	104849737	rs7794285	105024595	rs12533348	0.908822	rs7794285	G	A	0.0882737	3.48731	0.0004879	-4.20429	2.619e-05	SRPK2	0	intronic	0.028	7	5	5	1	0	0
10	7	104849737	rs7794285	105025737	rs6952458	0.908822	rs7794285	C	T	0.089417	3.47985	0.0005017	-4.14697	3.369e-05	SRPK2	0	intronic	2.01	7	4	5	1	0	0
10	7	104849737	rs7794285	105028238	rs3087867	0.908822	rs7794285	G	A	0.0912856	3.46761	0.0005251	-4.20481	2.613e-05	SRPK2	0	intronic	6.325	4	1	1	1	0	0
10	7	104849737	rs7794285	105035344	rs7809329	0.912644	rs7794285	G	T	0.0869243	3.49611	0.0004721	-3.99748	6.402e-05	SRPK2	0	intergenic	0.138	7	5	15	1	0	0
10	7	104849737	rs7794285	105035389	rs7809464	0.901694	rs7794285	G	A	0.0945265	3.44631	0.0005683	-4.06125	4.881e-05	SRPK2	0	intergenic	3.252	6	5	15	1	0	0
10	7	104849737	rs7794285	105035958	rs6977994	0.866722	rs7794285	C	T	0.0893516	3.48027	0.0005009	-4.5317	5.851e-06	SRPK2	0	intergenic	1.131	6	5	15	1	0	0
10	7	104940284	rs117754071	104639617	rs76017369	0.984114	rs117754071	A	C	0.0915296	3.95652	7.605e-05	-3.47534	0.0005102	LINC01004	0	ncRNA_intronic	0.804	6	4	5	0	0	1
10	7	104940284	rs117754071	104895766	rs77462620	0.984114	rs117754071	A	G	0.0485259	3.79524	0.0001475	-4.11439	3.882e-05	SRPK2	0	intronic	0.062	5	5	5	1	0	0
10	7	104940284	rs117754071	104913239	rs17721873	0.794561	rs117754071	C	T	0.0706709	3.79457	0.0001479	-3.60438	0.0003129	SRPK2	0	intronic	1.967	5	5	15	1	0	0
10	7	104940284	rs117754071	104920616	rs117053885	0.984114	rs117754071	T	C	0.0459314	3.81936	0.0001338	-4.17218	3.017e-05	SRPK2	0	intronic	1.543	6	5	15	1	0	1
10	7	104940284	rs117754071	104940284	rs117754071	1	rs117754071	C	T	0.0435645	3.84288	0.0001216	-4.08153	4.474e-05	SRPK2	0	intronic	2.954	7	5	15	1	0	1
11	8	87776287	rs1982564	87754626	rs10104596	0.683804	rs1982564	A	G	0.0756879	3.63694	0.0002759	-3.72722	0.0001936	CNGB3:RP11-386D6.1	0:0	ncRNA_intronic	2.945	7	5	15	1	1	0
11	8	87776287	rs1982564	87775901	rs10109425	1	rs1982564	G	A	0.0390085	3.88938	0.0001005	-3.98161	6.845e-05	RP11-386D6.1	0	ncRNA_intronic	2.79	5	5	15	0	1	0
11	8	87776287	rs1982564	87776287	rs1982564	1	rs1982564	G	T	0.038027	3.90001	9.619e-05	-4.00721	6.144e-05	RP11-386D6.1	0	ncRNA_intronic	4.195	5	5	15	0	1	0
11	8	87776287	rs1982564	87777391	rs10085929	1	rs1982564	C	A	0.0393622	3.88555	0.0001021	-4.01419	5.965e-05	RP11-386D6.1	139	upstream:downstream	1.438	7	5	15	0	1	0
12	8	142619234	rs1106761	142615222	rs11787216	0.888972	rs1106761	T	C	0.0668683	-4.70115	2.587e-06	-3.63139	0.0002819	AC138647.1	86384	intergenic	0.567	5	5	15	0	0	0
12	8	142619234	rs1106761	142617096	rs11782074	0.995507	rs1106761	T	G	0.0389766	-4.43354	9.27e-06	-3.87712	0.0001057	AC138647.1	88258	intergenic	0.405	3a	5	15	0	0	0
12	8	142619234	rs1106761	142619234	rs1106761	1	rs1106761	A	G	0.00595405	-4.48897	7.157e-06	-6.12418	9.115e-10	AC138647.1	90396	intergenic	2.201		5	15	0	0	0
12	8	142619234	rs1106761	142619393	rs1078141	1	rs1106761	T	C	0.00708219	-4.44369	8.843e-06	-6.07524	1.238e-09	AC138647.1	90555	intergenic	0.127		5	15	0	0	0
12	8	142619234	rs1106761	142624527	rs1566085	0.670637	rs1106761	G	T	0.0396672	-3.88224	0.0001035	-5.57857	2.425e-08	AC138647.1	95689	intergenic	2.44	5	5	14	0	0	1
12	8	142619234	rs1106761	142626471	rs11782665	0.921147	rs1106761	C	A	0.0066178	-4.4616	8.135e-06	-5.43499	5.48e-08	AC138647.1	97633	intergenic	7.274	5	5	13	0	0	1
12	8	142619234	rs1106761	142629949	rs7357604	0.928831	rs1106761	G	A	0.00647366	-4.46715	7.927e-06	-5.56928	2.558e-08	AC138647.1	101111	intergenic	0.689	5	5	14	0	0	1
12	8	142619234	rs1106761	142632258	rs28744600	0.869596	rs1106761	T	C	0.00861865	-4.39048	1.131e-05	-5.51318	3.524e-08	AC138647.1	103420	intergenic	18.52	5	5	14	0	0	0
12	8	142619234	rs1106761	142633630	rs12549680	0.919605	rs1106761	T	C	0.0113465	-4.31225	1.616e-05	-5.46065	4.744e-08	AC138647.1	104792	intergenic	0.823	5	5	15	0	0	0
12	8	142619234	rs1106761	142637867	rs11775333	0.89412	rs1106761	C	T	0.0126704	-4.27999	1.869e-05	-5.0401	4.653e-07	AC138647.1	109029	intergenic	1.638	5	5	15	0	0	0
12	8	142619234	rs1106761	142639657	rs7846428	0.88567	rs1106761	A	G	0.0148679	-4.23163	2.32e-05	-5.12276	3.011e-07	AC138647.1	110819	intergenic	0.411	4	5	15	0	0	0
12	8	142619234	rs1106761	142640905	rs2379268	0.89412	rs1106761	A	G	0.0118771	-4.29935	1.713e-05	-5.09864	3.421e-07	AC138647.1	112067	intergenic	0.131	5	5	9	0	0	0
12	8	142619234	rs1106761	142646105	rs10088132	0.65005	rs1106761	T	C	0.0701081	-3.61573	0.0002995	-4.82458	1.403e-06	AC138647.1	117267	intergenic	2.116	5	7	15	0	0	0
12	8	142619234	rs1106761	142647688	rs11782215	0.876366	rs1106761	A	G	0.0117917	-4.30143	1.697e-05	-5.00237	5.663e-07	AC138647.1	118850	intergenic	1.195	5	5	15	0	0	0
12	8	142619234	rs1106761	142651709	rs11786084	0.648069	rs1106761	A	G	0.0290078	-4.00556	6.187e-05	-4.30013	1.707e-05	AC138647.1	122871	intergenic	0.646	5	7	15	0	0	0
13	10	106745104	rs6584649	106653311	rs17078	0.81186	rs6584649	G	A	0.0915192	-3.46608	0.0005281	3.92481	8.68e-05	SORCS3	0	intronic	7.619		7	15	1	0	0
13	10	106745104	rs6584649	106742918	rs11192260	0.92572	rs6584649	T	C	0.0983514	-3.42245	0.0006206	4.29121	1.777e-05	SORCS3	0	intronic	1.283	5	9	15	1	0	0
13	10	106745104	rs6584649	106743372	rs11192262	0.971176	rs6584649	T	G	0.0962246	-3.43544	0.0005916	3.92013	8.85e-05	SORCS3	0	intronic	2.476	7	9	15	1	0	0
13	10	106745104	rs6584649	106744534	rs12265655	1	rs6584649	C	T	0.0461341	-3.81734	0.0001349	3.90279	9.509e-05	SORCS3	0	intronic	2.995	6	9	15	1	0	0
13	10	106745104	rs6584649	106745104	rs6584649	1	rs6584649	G	T	0.0458201	-3.82047	0.0001332	3.87781	0.0001054	SORCS3	0	intronic	2.61	5	9	15	1	0	0
13	10	106745104	rs6584649	106755196	rs10400180	0.994238	rs6584649	G	T	0.0560688	-3.72827	0.0001928	3.8517	0.0001173	SORCS3	0	intronic	0.225	7	9	15	1	0	0
13	10	106745104	rs6584649	106761616	rs11192270	0.982741	rs6584649	T	C	0.054598	-3.74071	0.0001835	3.87897	0.0001049	SORCS3	0	intronic	5.269	6	9	15	1	0	0
13	10	106745104	rs6584649	106763464	rs2902645	0.932148	rs6584649	G	A	0.0763903	-3.56903	0.0003583	4.2213	2.429e-05	SORCS3	0	intronic	0.137	7	9	15	1	0	0
13	10	106745104	rs6584649	106764047	rs1997063	0.932148	rs6584649	C	T	0.0717315	-3.60372	0.0003137	4.10899	3.974e-05	SORCS3	0	intronic	6.108		7	15	1	0	0
13	10	106745104	rs6584649	106764193	rs10400054	0.932148	rs6584649	C	A	0.0729393	-3.59475	0.0003247	3.94428	8.004e-05	SORCS3	0	intronic	0.614	7	7	15	1	0	0
13	10	106745104	rs6584649	106764204	rs10400055	0.932148	rs6584649	G	A	0.0729393	-3.59475	0.0003247	4.09819	4.164e-05	SORCS3	0	intronic	5.545	6	7	15	1	0	0
13	10	106745104	rs6584649	106764748	rs17118088	0.932148	rs6584649	A	G	0.0735704	-3.59006	0.0003306	4.26759	1.976e-05	SORCS3	0	intronic	2.835	7	7	15	1	0	0
13	10	106745104	rs6584649	106764868	rs61867194	0.932148	rs6584649	C	A	0.0745633	-3.58267	0.0003401	4.10963	3.963e-05	SORCS3	0	intronic	1.295	7	9	15	1	0	0
14	10	133761285	rs34473884	133729181	rs17881016	0.848859	rs34473884	G	A	0.090688	3.47153	0.0005175	5.12835	2.923e-07	PPP2R2D	18773	intergenic	1.04	5	2	15	0	1	0
14	10	133761285	rs34473884	133736245	rs12762699	0.925897	rs34473884	T	C	0.0378986	3.90139	9.564e-05	5.31716	1.054e-07	PPP2R2D	11709	intergenic	0.147	5	5	5	0	1	0
14	10	133761285	rs34473884	133739005	rs11591860	0.925242	rs34473884	A	C	0.0511114	3.77161	0.0001622	5.37888	7.495e-08	PPP2R2D	8949	intergenic	0.349	4	4	5	1	1	0
14	10	133761285	rs34473884	133741749	rs11146134	0.987841	rs34473884	T	C	0.0292328	4.0026	6.265e-05	5.34556	9.014e-08	PPP2R2D	6205	intergenic	1.068	4	2	7	1	1	0
14	10	133761285	rs34473884	133744035	rs58142972	0.925897	rs34473884	C	T	0.0396455	3.88247	0.0001034	5.40795	6.375e-08	PPP2R2D	3919	intergenic	7.848	5	4	5	1	1	0
14	10	133761285	rs34473884	133749294	rs12771973	0.925242	rs34473884	A	G	0.043666	3.84187	0.0001221	5.26381	1.411e-07	PPP2R2D	0	intronic	0.222	7	4	5	1	1	0
14	10	133761285	rs34473884	133750141	rs7085239	0.930738	rs34473884	G	A	0.040349	3.87483	0.0001067	5.21053	1.883e-07	PPP2R2D	0	intronic	1.872	5	4	5	1	1	0
14	10	133761285	rs34473884	133750199	rs7077135	0.930738	rs34473884	C	T	0.038861	3.89098	9.984e-05	5.21152	1.873e-07	PPP2R2D	0	intronic	4.634	5	4	5	1	1	0
14	10	133761285	rs34473884	133761285	rs34473884	1	rs34473884	A	G	0.017968	4.17158	3.025e-05	5.2554	1.477e-07	PPP2R2D	0	exonic	23	5	2	4	1	1	0
14	10	133761285	rs34473884	133775196	rs7921305	0.92122	rs34473884	A	G	0.0335085	3.95056	7.797e-05	5.6332	1.769e-08	PPP2R2D	1864	intergenic	0.795	5	1	5	1	1	0
14	10	133761285	rs34473884	133775231	rs7921418	0.92122	rs34473884	A	G	0.0322629	3.96534	7.329e-05	5.60815	2.045e-08	PPP2R2D	1899	intergenic	0.739	5	1	5	1	1	0
14	10	133761285	rs34473884	133775375	rs12761761	0.970132	rs34473884	T	C	0.0181682	4.16784	3.075e-05	5.57736	2.442e-08	PPP2R2D	2043	intergenic	1.216	5	1	5	1	1	0
14	10	133761285	rs34473884	133775833	rs12411375	0.925897	rs34473884	T	G	0.0249191	4.06078	4.891e-05	5.61861	1.925e-08	PPP2R2D	2501	intergenic	0.365	4	1	5	1	1	0
14	10	133761285	rs34473884	133785336	rs12764703	0.920623	rs34473884	A	G	0.022774	4.09215	4.274e-05	5.53018	3.199e-08	BNIP3	0	intronic	0.291	4	2	4	1	1	0
14	10	133761285	rs34473884	133802961	rs56118554	0.927875	rs34473884	T	C	0.02574	4.04871	5.15e-05	5.11157	3.195e-07	BNIP3	7525	intergenic	3.825	6	5	15	1	1	1
15	14	29419892	rs140802584	29396922	rs118110515	1	rs140802584	T	G	0.0569436	3.97241	7.115e-05	-3.7074	0.0002094	CTD-2384A14.1	0	ncRNA_intronic	0.388	6	9	15	0	0	0
15	14	29419892	rs140802584	29419892	rs140802584	1	rs140802584	G	A	0.0343212	4.01782	5.874e-05	-3.93223	8.416e-05	CTD-2384A14.1:RP11-148E17.1	0:0	ncRNA_intronic	2.571	6	9	15	0	0	0
15	14	29419892	rs140802584	29524041	rs17638843	0.88273	rs140802584	C	T	0.0353891	3.92844	8.55e-05	-4.2012	2.655e-05	RP11-148E17.1	26071	intergenic	9.654	7	9	15	0	0	0
16	14	104017953	rs10149470	104017953	rs10149470	1	rs10149470	A	G	0.0352341	-3.9301	8.491e-05	-7.38778	1.493e-13	RNU7-160P	1209	intergenic	0.468	2b	1	5	1	1	1
16	14	104017953	rs10149470	104018105	rs10141157	1	rs10149470	T	C	0.035745	-3.92461	8.687e-05	-7.18597	6.673e-13	RNU7-160P	1361	intergenic	2.211	4	1	5	1	1	1
16	14	104017953	rs10149470	104018455	rs10129426	0.908945	rs10149470	G	A	0.0962171	-3.43548	0.0005915	-7.41351	1.23e-13	RP11-894P9.2	1302	intergenic	3.235	1f	1	5	1	1	1
17	17	43856458	rs35076622	43856458	rs35076622	1	rs7207582	A	G	0.0451036	3.8276	0.0001294	-3.88153	0.0001038	CRHR1:RP11-105N13.4	0:0	ncRNA_intronic	3.411	5	5	14	1	1	0
17	17	44071851	rs2435200	44065263	rs713522	0.942509	rs7207582	C	T	0.0345618	3.93801	8.216e-05	-3.99414	6.493e-05	MAPT	0	intronic	1.739		4	15	1	1	0
17	17	44071851	rs2435200	44070583	rs2471737	0.954229	rs7207582	G	A	0.0413565	3.96134	7.453e-05	-3.85191	0.0001172	MAPT	0	intronic	6.432	3a	4	15	1	1	1
17	17	44071851	rs2435200	44071851	rs2435200	1	rs7207582	A	G	0.025857	4.04699	5.188e-05	-4.12422	3.72e-05	MAPT	0	intronic	0.054	6	4	15	1	1	1
17	17	44210933	rs7207582	43463493	rs79724577	0.676408	rs7207582	C	A	0.0949999	3.44319	0.0005749	-4.43559	9.182e-06	ARHGAP27	7781	intergenic	7.034	5	5	14	1	1	0
17	17	44210933	rs7207582	43471489	rs4763	0.662116	rs7207582	A	G	0.092705	3.4583	0.0005436	-4.58787	4.478e-06	ARHGAP27	0	UTR3	14.83		4	5	1	1	1
17	17	44210933	rs7207582	43476807	rs56220387	0.69637	rs7207582	G	A	0.0917437	3.46461	0.000531	-4.80649	1.536e-06	ARHGAP27	0	intronic	1.44	6	4	5	1	1	1
17	17	44210933	rs7207582	43479748	rs55793500	0.685149	rs7207582	C	T	0.0990195	3.41836	0.00063	-4.79583	1.62e-06	ARHGAP27	0	intronic	1.254	5	4	4	1	1	1
17	17	44210933	rs7207582	43480701	rs62064600	0.685149	rs7207582	A	G	0.0928029	3.45765	0.0005449	-4.8299	1.366e-06	ARHGAP27	0	intronic	0.942	5	4	4	1	1	1
17	17	44210933	rs7207582	43483551	rs56236914	0.685149	rs7207582	T	C	0.0924554	3.45994	0.0005403	-4.73238	2.219e-06	ARHGAP27	0	intronic	4.604	5	1	5	1	1	1
17	17	44210933	rs7207582	43485551	rs62064637	0.685149	rs7207582	G	T	0.0991955	3.41728	0.0006325	-4.89664	9.749e-07	ARHGAP27	0	intronic	0.517	5	1	5	1	1	1
17	17	44210933	rs7207582	43487217	rs36078910	0.687325	rs7207582	A	G	0.0780238	3.55764	0.0003742	-4.94527	7.604e-07	ARHGAP27	0	intronic	3.725	4	1	1	1	1	1
17	17	44210933	rs7207582	43487424	rs35389313	0.687325	rs7207582	C	T	0.0780137	3.55771	0.0003741	-4.96273	6.951e-07	ARHGAP27	0	intronic	8.401	4	1	1	1	1	1
17	17	44210933	rs7207582	43487574	rs35327136	0.688663	rs7207582	A	C	0.0722967	3.59952	0.0003188	-4.73719	2.167e-06	ARHGAP27	0	intronic	6.242	2b	1	1	1	1	1
17	17	44210933	rs7207582	43488382	rs8071011	0.687325	rs7207582	T	C	0.0764587	3.56852	0.000359	-4.87465	1.09e-06	ARHGAP27	0	intronic	2.491	2b	1	7	1	1	1
17	17	44210933	rs7207582	43488792	rs62064641	0.687325	rs7207582	C	T	0.0769141	3.56533	0.0003634	-5.00234	5.664e-07	ARHGAP27	0	intronic	2.253	5	2	7	1	1	1
17	17	44210933	rs7207582	43490853	rs62064643	0.69844	rs7207582	A	G	0.0741903	3.58545	0.0003365	-4.8477	1.249e-06	ARHGAP27	0	intronic	1.202	4	2	15	1	1	1
17	17	44210933	rs7207582	43491003	rs34063617	0.687325	rs7207582	A	G	0.087037	3.49537	0.0004734	-5.03287	4.832e-07	ARHGAP27	0	intronic	0.147	4	2	15	1	1	1
17	17	44210933	rs7207582	43492357	rs12940792	0.687325	rs7207582	T	C	0.0789442	3.55125	0.0003834	-4.94834	7.485e-07	ARHGAP27	0	intronic	2.327	5	5	15	1	1	1
17	17	44210933	rs7207582	43493101	rs12947718	0.687325	rs7207582	A	G	0.0788947	3.5516	0.0003829	-5.16394	2.418e-07	ARHGAP27	0	intronic	0.362	1f	2	15	1	1	1
17	17	44210933	rs7207582	43493504	rs71373560	0.687325	rs7207582	T	C	0.0788947	3.5516	0.0003829	-5.03907	4.678e-07	ARHGAP27	0	intronic	7.775	6	5	15	1	1	1
17	17	44210933	rs7207582	43493835	rs12942951	0.667535	rs7207582	C	T	0.0660168	3.64712	0.0002652	-5.01567	5.285e-07	ARHGAP27	0	intronic	6.533	5	5	15	1	1	1
17	17	44210933	rs7207582	43495216	rs35884427	0.687325	rs7207582	A	G	0.0788947	3.5516	0.0003829	-5.06608	4.061e-07	ARHGAP27	0	intronic	2.764	7	4	15	1	1	1
17	17	44210933	rs7207582	43495852	rs34286926	0.691799	rs7207582	G	A	0.0789837	3.55098	0.0003838	-5.05349	4.338e-07	ARHGAP27	0	intronic	0.495	2b	4	15	1	1	1
17	17	44210933	rs7207582	43496465	rs56378631	0.691799	rs7207582	C	T	0.0774113	3.56189	0.0003682	-5.09104	3.561e-07	ARHGAP27	0	intronic	6.297	5	4	15	1	1	1
17	17	44210933	rs7207582	43496828	rs12946723	0.691799	rs7207582	T	C	0.0763217	3.56955	0.0003576	-5.09688	3.453e-07	ARHGAP27	0	intronic	0.285	6	4	15	1	1	1
17	17	44210933	rs7207582	43497210	rs12952764	0.691799	rs7207582	A	G	0.0767469	3.56649	0.0003618	-5.08699	3.638e-07	ARHGAP27	0	intronic	0.507	5	4	15	1	1	1
17	17	44210933	rs7207582	43498180	rs35420583	0.691799	rs7207582	T	C	0.0785867	3.55374	0.0003798	-5.05723	4.254e-07	ARHGAP27	0	intronic	0.612	7	4	15	1	1	1
17	17	44210933	rs7207582	43498181	rs34792542	0.691799	rs7207582	G	A	0.078034	3.55757	0.0003743	-4.95869	7.097e-07	ARHGAP27	0	intronic	0.778	7	4	15	1	1	1
17	17	44210933	rs7207582	43499328	rs35519908	0.691799	rs7207582	C	T	0.0768828	3.56555	0.0003631	-5.07891	3.796e-07	ARHGAP27	0	intronic	1.028	7	4	15	1	1	1
17	17	44210933	rs7207582	43499839	rs12942666	0.691799	rs7207582	G	A	0.0764294	3.56874	0.0003587	-5.08368	3.702e-07	ARHGAP27	0	intronic	7.194	6	4	15	1	1	1
17	17	44210933	rs7207582	43500477	rs62064645	0.703078	rs7207582	A	G	0.0758382	3.57316	0.0003527	-4.88391	1.04e-06	ARHGAP27	0	intronic	0.956	7	4	15	1	1	1
17	17	44210933	rs7207582	43500587	rs62064646	0.691799	rs7207582	A	G	0.0766211	3.56736	0.0003606	-5.03358	4.814e-07	ARHGAP27	0	intronic	2.418	6	4	15	1	1	1
17	17	44210933	rs7207582	43500621	rs62064647	0.691799	rs7207582	A	G	0.0784568	3.55464	0.0003785	-5.02463	5.044e-07	ARHGAP27	0	intronic	10.48	6	1	15	1	1	1
17	17	44210933	rs7207582	43501442	rs7222389	0.691799	rs7207582	C	T	0.0771014	3.56403	0.0003652	-5.08138	3.747e-07	ARHGAP27	0	intronic	0.31	1f	1	15	1	1	1
17	17	44210933	rs7207582	43501591	rs55648326	0.691799	rs7207582	C	T	0.0782258	3.55624	0.0003762	-4.97461	6.538e-07	ARHGAP27	0	intronic	12.07	5	1	15	1	1	1
17	17	44210933	rs7207582	43501940	rs56212100	0.686231	rs7207582	A	G	0.0767365	3.56656	0.0003617	-5.00919	5.466e-07	ARHGAP27	0	intronic	3.345	5	1	15	1	1	1
17	17	44210933	rs7207582	43502111	rs62064649	0.691799	rs7207582	G	A	0.0771014	3.56403	0.0003652	-5.0149	5.306e-07	ARHGAP27	0	intronic	0.976	7	1	15	1	1	1
17	17	44210933	rs7207582	43502241	rs35626715	0.691799	rs7207582	C	T	0.0771014	3.56403	0.0003652	-5.05126	4.389e-07	ARHGAP27	0	intronic	12.37	5	1	15	1	1	1
17	17	44210933	rs7207582	43503284	rs76344126	0.703078	rs7207582	A	G	0.0801215	3.54307	0.0003955	-4.8198	1.437e-06	ARHGAP27	0	intronic	4.063	4	1	7	1	1	1
17	17	44210933	rs7207582	43503294	rs7209501	0.697414	rs7207582	C	A	0.073929	3.58739	0.000334	-4.94722	7.528e-07	ARHGAP27	0	intronic	7.138	2b	1	7	1	1	1
17	17	44210933	rs7207582	43507297	rs12949256	0.703078	rs7207582	T	C	0.0687116	3.62604	0.0002878	-4.77999	1.753e-06	ARHGAP27	0	exonic	14.99	4	1	13	1	1	1
17	17	44210933	rs7207582	43507403	rs7220206	0.703078	rs7207582	A	G	0.0714848	3.60554	0.0003115	-4.84659	1.256e-06	ARHGAP27	0	exonic	5.617	2b	1	13	1	1	1
17	17	44210933	rs7207582	43507649	rs7222444	0.703078	rs7207582	G	A	0.0714961	3.60546	0.0003116	-4.87538	1.086e-06	ARHGAP27	0	UTR5	18.95	4	1	13	1	1	1
17	17	44210933	rs7207582	43508223	rs12939187	0.703078	rs7207582	T	G	0.0714848	3.60554	0.0003115	-4.92507	8.433e-07	ARHGAP27	0	intronic	6.965	4	1	11	1	1	1
17	17	44210933	rs7207582	43508303	rs34018943	0.703078	rs7207582	G	A	0.0712365	3.60738	0.0003093	-4.89007	1.008e-06	ARHGAP27	0	intronic	8.007	4	1	11	1	1	1
17	17	44210933	rs7207582	43508616	rs34104358	0.703078	rs7207582	T	G	0.0712251	3.60747	0.0003092	-4.8927	9.946e-07	ARHGAP27	0	intronic	6.331	2b	1	2	1	1	1
17	17	44210933	rs7207582	43509310	rs62064652	0.699202	rs7207582	G	A	0.07395	3.58724	0.0003342	-4.87665	1.079e-06	ARHGAP27	0	intronic	1.637	4	1	1	1	1	1
17	17	44210933	rs7207582	43509316	rs62064653	0.699202	rs7207582	T	C	0.0737185	3.58896	0.000332	-4.88949	1.011e-06	ARHGAP27	0	intronic	7.192	4	1	1	1	1	1
17	17	44210933	rs7207582	43509778	rs56020833	0.703078	rs7207582	T	C	0.0749629	3.57969	0.000344	-4.88429	1.038e-06	ARHGAP27	0	intronic	10.31	2b	1	1	1	1	1
17	17	44210933	rs7207582	43511435	rs34465449	0.703078	rs7207582	A	C	0.0708147	3.61051	0.0003056	-4.75648	1.97e-06	ARHGAP27	0	intronic	1.001	7	4	5	1	1	1
17	17	44210933	rs7207582	43512206	rs12946900	0.703078	rs7207582	G	A	0.0710433	3.60881	0.0003076	-4.80301	1.563e-06	ARHGAP27	418	upstream	2.186	2c	4	5	1	1	1
17	17	44210933	rs7207582	43512318	rs56168933	0.703078	rs7207582	A	G	0.0755989	3.57495	0.0003503	-4.80636	1.537e-06	ARHGAP27	530	upstream:downstream	2	7	4	5	1	1	1
17	17	44210933	rs7207582	43513441	rs11012	0.697414	rs7207582	T	C	0.0734004	3.59133	0.000329	-4.88793	1.019e-06	PLEKHM1	0	UTR3	0.233		4	4	1	1	1
17	17	44210933	rs7207582	43513896	rs62064654	0.703078	rs7207582	T	C	0.0748302	3.58068	0.0003427	-4.78358	1.722e-06	PLEKHM1	0	UTR3	1.31	5	4	4	1	1	1
17	17	44210933	rs7207582	43514954	rs62064655	0.703078	rs7207582	A	G	0.0707803	3.61076	0.0003053	-4.67518	2.937e-06	PLEKHM1	0	UTR3	7.13	5	4	4	1	1	1
17	17	44210933	rs7207582	43515885	rs36114997	0.703078	rs7207582	G	A	0.0707803	3.61076	0.0003053	-4.75978	1.938e-06	PLEKHM1	0	intronic	1.67	7	4	4	1	1	1
17	17	44210933	rs7207582	43516402	rs17631303	0.703078	rs7207582	G	A	0.0759572	3.57227	0.0003539	-4.83034	1.363e-06	PLEKHM1	0	intronic	10.76	1d	3	4	1	1	1
17	17	44210933	rs7207582	43517054	rs62064657	0.703078	rs7207582	A	G	0.0759968	3.57197	0.0003543	-4.78068	1.747e-06	PLEKHM1	0	intronic	8.784	5	2	5	1	1	1
17	17	44210933	rs7207582	43517252	rs35489312	0.703078	rs7207582	C	T	0.0723516	3.59912	0.0003193	-4.78675	1.695e-06	PLEKHM1	0	intronic	3.279	5	4	4	1	1	1
17	17	44210933	rs7207582	43520118	rs2684641	0.703078	rs7207582	G	A	0.0724502	3.59838	0.0003202	-4.77851	1.766e-06	PLEKHM1	0	intronic	0.119	5	4	5	1	1	1
17	17	44210933	rs7207582	43522361	rs62065378	0.703078	rs7207582	C	T	0.070353	3.61392	0.0003016	-4.81994	1.436e-06	PLEKHM1	0	intronic	1.236	7	4	5	1	1	1
17	17	44210933	rs7207582	43524526	rs113575082	0.703078	rs7207582	T	C	0.0746662	3.5819	0.0003411	-4.82106	1.428e-06	PLEKHM1	0	intronic	6.179	5	4	5	1	1	1
17	17	44210933	rs7207582	43525022	rs71373572	0.703078	rs7207582	A	G	0.0701315	3.61556	0.0002997	-4.78068	1.747e-06	PLEKHM1	0	intronic	0.472	5	4	5	1	1	1
17	17	44210933	rs7207582	43525365	rs62065379	0.703078	rs7207582	T	C	0.0741903	3.58545	0.0003365	-4.815	1.472e-06	PLEKHM1	0	intronic	0.303	7	4	5	1	1	1
17	17	44210933	rs7207582	43527323	rs112538459	0.703078	rs7207582	T	C	0.0699321	3.61703	0.000298	-4.79707	1.61e-06	PLEKHM1	0	intronic	1.698	6	4	5	1	1	1
17	17	44210933	rs7207582	43529293	rs2077606	0.703078	rs7207582	A	G	0.0699321	3.61703	0.000298	-4.86683	1.134e-06	PLEKHM1	0	intronic	10.41	1f	4	5	1	1	1
17	17	44210933	rs7207582	43534353	rs2960000	0.692333	rs7207582	C	T	0.0390085	3.88938	0.0001005	-4.90075	9.547e-07	PLEKHM1:AC091132.1	0:0	ncRNA_intronic	7.751		4	5	1	1	1
17	17	44210933	rs7207582	43534694	rs62065385	0.701317	rs7207582	T	C	0.076862	3.56569	0.0003629	-4.77334	1.812e-06	PLEKHM1:AC091132.1	0:0	ncRNA_intronic	2.772	6	4	5	1	1	1
17	17	44210933	rs7207582	43536408	rs55703888	0.703078	rs7207582	T	C	0.069708	3.61869	0.0002961	-4.79325	1.641e-06	PLEKHM1:AC091132.1	0:0	ncRNA_intronic	0.135	6	4	5	1	1	1
17	17	44210933	rs7207582	43536743	rs56005713	0.703078	rs7207582	T	C	0.069708	3.61869	0.0002961	-4.76367	1.901e-06	PLEKHM1:AC091132.1	0:0	ncRNA_intronic	0.843	6	4	5	1	1	1
17	17	44210933	rs7207582	43538523	rs111423688	0.703078	rs7207582	A	G	0.0735598	3.59014	0.0003305	-4.75668	1.968e-06	PLEKHM1:AC091132.1	0:0	ncRNA_intronic	1.512	7	4	5	1	1	1
17	17	44210933	rs7207582	43538807	rs62065389	0.703078	rs7207582	G	T	0.0735704	3.59006	0.0003306	-4.73459	2.195e-06	PLEKHM1:AC091132.1	0:0	ncRNA_intronic	5.457	5	4	5	1	1	1
17	17	44210933	rs7207582	43539968	rs77099723	0.703078	rs7207582	A	G	0.0694943	3.62027	0.0002943	-4.77931	1.759e-06	PLEKHM1:AC091132.1	0:0	ncRNA_intronic	8.647	5	4	5	1	1	1
17	17	44210933	rs7207582	43541627	rs2139890	0.703078	rs7207582	A	C	0.0694943	3.62027	0.0002943	-4.76051	1.931e-06	PLEKHM1	0	intronic	0.807	7	4	5	1	1	0
17	17	44210933	rs7207582	43541656	rs3946526	0.703078	rs7207582	T	C	0.0763413	3.5694	0.0003578	-4.8396	1.301e-06	PLEKHM1	0	intronic	0.887	6	4	5	1	1	0
17	17	44210933	rs7207582	43544379	rs55663797	0.731113	rs7207582	A	G	0.0461891	3.81679	0.0001352	-4.54718	5.437e-06	PLEKHM1	0	intronic	0.166	5	4	5	1	1	0
17	17	44210933	rs7207582	43545893	rs1879581	0.731113	rs7207582	C	T	0.0461891	3.81679	0.0001352	-4.62335	3.776e-06	PLEKHM1	0	exonic	3.875	4	4	5	1	1	0
17	17	44210933	rs7207582	43548424	rs55671319	0.731113	rs7207582	G	A	0.048285	3.79744	0.0001462	-4.64143	3.46e-06	PLEKHM1	0	intronic	8.633	7	4	5	1	1	0
17	17	44210933	rs7207582	43548481	rs55652155	0.731113	rs7207582	G	A	0.0460237	3.81844	0.0001343	-4.67813	2.895e-06	PLEKHM1	0	intronic	5.514	6	4	5	1	1	0
17	17	44210933	rs7207582	43549526	rs17631676	0.731113	rs7207582	G	A	0.0491641	3.78942	0.000151	-4.70194	2.577e-06	PLEKHM1	0	intronic	0.51	6	4	5	1	1	0
17	17	44210933	rs7207582	43549608	rs149366495	0.731113	rs7207582	A	G	0.0465956	3.8128	0.0001374	-4.66871	3.031e-06	PLEKHM1	0	intronic	11.28	4	4	5	1	1	0
17	17	44210933	rs7207582	43550107	rs2090847	0.731113	rs7207582	G	A	0.045671	3.82195	0.0001324	-4.68106	2.854e-06	PLEKHM1	0	intronic	2.169	5	4	5	1	1	1
17	17	44210933	rs7207582	43551083	rs55746869	0.731113	rs7207582	T	C	0.0483036	3.79727	0.0001463	-4.61916	3.853e-06	PLEKHM1	0	intronic	2.21	7	4	5	1	1	1
17	17	44210933	rs7207582	43551613	rs62065404	0.731113	rs7207582	T	C	0.0455021	3.82363	0.0001315	-4.68199	2.841e-06	PLEKHM1	0	intronic	5.254	7	4	5	1	1	1
17	17	44210933	rs7207582	43552537	rs71238846	0.731113	rs7207582	A	G	0.0458572	3.8201	0.0001334	-4.62868	3.68e-06	PLEKHM1	0	exonic	8.772		4	4	1	1	1
17	17	44210933	rs7207582	43552921	rs12452273	0.731113	rs7207582	T	C	0.0458572	3.8201	0.0001334	-4.66756	3.048e-06	PLEKHM1	0	exonic	8.02	5	4	4	1	1	1
17	17	44210933	rs7207582	43555253	rs56192752	0.731113	rs7207582	G	A	0.0457083	3.82158	0.0001326	-4.69833	2.623e-06	PLEKHM1	0	UTR3	5.088	5	4	4	1	1	1
17	17	44210933	rs7207582	43556652	rs62065436	0.731113	rs7207582	A	G	0.0459499	3.81917	0.0001339	-4.67764	2.902e-06	PLEKHM1	0	intronic	0.126	6	4	5	1	1	1
17	17	44210933	rs7207582	43556807	rs55925547	0.719741	rs7207582	C	T	0.0574997	3.71613	0.0002023	-4.7251	2.3e-06	PLEKHM1	0	intronic	2.617	7	5	5	1	1	1
17	17	44210933	rs7207582	43556982	rs55643511	0.731113	rs7207582	A	G	0.0451609	3.82703	0.0001297	-4.65646	3.217e-06	PLEKHM1	0	intronic	1.721	7	5	5	1	1	1
17	17	44210933	rs7207582	43557612	rs62065437	0.731113	rs7207582	A	G	0.0455397	3.82326	0.0001317	-4.64462	3.407e-06	PLEKHM1	0	intronic	2.232	7	5	5	1	1	1
17	17	44210933	rs7207582	43558092	rs62065438	0.731113	rs7207582	T	C	0.0471834	3.80746	0.0001404	-4.65755	3.2e-06	PLEKHM1	0	intronic	4.508	7	4	5	1	1	1
17	17	44210933	rs7207582	43563894	rs62065442	0.731113	rs7207582	C	T	0.0459868	3.8188	0.0001341	-4.66521	3.083e-06	PLEKHM1	0	intronic	0.248	5	5	5	1	1	1
17	17	44210933	rs7207582	43564222	rs144733372	0.731113	rs7207582	G	T	0.044718	3.83143	0.0001274	-4.62846	3.684e-06	PLEKHM1	0	intronic	0.406	7	5	5	1	1	1
17	17	44210933	rs7207582	43565840	rs62065445	0.731113	rs7207582	A	G	0.0489652	3.79124	0.0001499	-4.70289	2.565e-06	PLEKHM1	0	intronic	7.028	5	5	5	1	1	1
17	17	44210933	rs7207582	43567175	rs1879585	0.735963	rs7207582	G	T	0.0457643	3.82102	0.0001329	-4.60569	4.111e-06	PLEKHM1	0	intronic	2.743	5	1	5	1	1	1
17	17	44210933	rs7207582	43570407	rs62065450	0.743942	rs7207582	T	C	0.0464622	3.81406	0.0001367	-4.67295	2.969e-06	PLEKHM1	2291	intergenic	2.101	3b	5	15	1	1	1
17	17	44210933	rs7207582	43570893	rs1879583	0.743942	rs7207582	T	C	0.0484705	3.79575	0.0001472	-4.61744	3.885e-06	PLEKHM1	2777	intergenic	0.38	7	5	15	1	1	1
17	17	44210933	rs7207582	43572419	rs56328224	0.942249	rs7207582	T	C	0.00659037	4.46266	8.095e-06	-4.7924	1.648e-06	PLEKHM1	4303	intergenic	4.081	7	5	15	1	1	1
17	17	44210933	rs7207582	43573419	rs62065453	0.942249	rs7207582	T	C	0.00779638	4.4175	9.985e-06	-4.73321	2.21e-06	LRRC37A4P	5265	intergenic	4.627	6	5	15	1	1	1
17	17	44210933	rs7207582	43663247	rs1724390	0.952497	rs7207582	A	C	0.0156712	4.21453	2.503e-05	-4.64891	3.337e-06	DND1P1	0	ncRNA_exonic	10.11	4	1	1	0	1	1
17	17	44210933	rs7207582	43685826	rs413519	0.968522	rs7207582	G	A	0.00761752	4.42335	9.718e-06	-4.90582	9.304e-07	RPS26P8	82	upstream	2.393		14	15	0	1	1
17	17	44210933	rs7207582	43686420	rs440778	0.968522	rs7207582	G	A	0.00716837	4.44036	8.981e-06	-4.98513	6.192e-07	RPS26P8	70	downstream	2.846		14	15	0	1	1
17	17	44210933	rs7207582	43692935	rs611351	0.968522	rs7207582	G	A	0.0075044	4.42735	9.54e-06	-4.80911	1.516e-06	CRHR1-IT1	4758	intergenic	7.14		14	15	1	1	1
17	17	44210933	rs7207582	43705356	rs383241	0.96339	rs7207582	A	G	0.00755338	4.42545	9.624e-06	-4.92955	8.242e-07	CRHR1-IT1:CRHR1:RP11-105N13.4	0:0:0	ncRNA_intronic	1.367		4	5	1	1	0
17	17	44210933	rs7207582	43705518	rs376120	0.96339	rs7207582	G	A	0.00754624	4.42572	9.612e-06	-4.87647	1.08e-06	CRHR1-IT1:CRHR1:RP11-105N13.4	0:0:0	ncRNA_intronic	2.004		4	5	1	1	0
17	17	44210933	rs7207582	43705601	rs365825	0.952876	rs7207582	G	A	0.00661643	4.46165	8.133e-06	-4.80964	1.512e-06	CRHR1-IT1:CRHR1:RP11-105N13.4	0:0:0	ncRNA_intronic	3.201		4	5	1	1	0
17	17	44210933	rs7207582	43707619	rs681485	0.95829	rs7207582	A	C	0.00918344	4.37202	1.231e-05	-4.8558	1.199e-06	CRHR1-IT1:CRHR1:RP11-105N13.4	0:0:0	ncRNA_exonic	1.161		4	4	1	1	0
17	17	44210933	rs7207582	43707620	rs594591	0.96339	rs7207582	T	G	0.00755338	4.42545	9.624e-06	-4.88601	1.029e-06	CRHR1-IT1:CRHR1:RP11-105N13.4	0:0:0	ncRNA_exonic	0.3		4	4	1	1	0
17	17	44210933	rs7207582	43707951	rs444071	0.96339	rs7207582	T	C	0.00755338	4.42545	9.624e-06	-4.90399	9.391e-07	CRHR1-IT1:CRHR1:RP11-105N13.4	0:0:0	ncRNA_exonic	3.796		4	4	1	1	0
17	17	44210933	rs7207582	43707955	rs396593	0.96339	rs7207582	A	C	0.00755338	4.42545	9.624e-06	-4.86718	1.132e-06	CRHR1-IT1:CRHR1:RP11-105N13.4	0:0:0	ncRNA_exonic	0.484		4	4	1	1	0
17	17	44210933	rs7207582	43709415	rs436667	0.96339	rs7207582	T	C	0.00755338	4.42545	9.624e-06	-4.95803	7.121e-07	CRHR1-IT1:CRHR1:RP11-105N13.4	0:0:0	ncRNA_intronic	6.134	1f	4	4	1	1	0
17	17	44210933	rs7207582	43709867	rs650927	0.96339	rs7207582	G	T	0.00750556	4.4273	9.542e-06	-4.89537	9.812e-07	CRHR1-IT1:CRHR1:RP11-105N13.4	0:0:0	ncRNA_intronic	5.492		4	5	1	1	0
17	17	44210933	rs7207582	43709893	rs671740	0.96339	rs7207582	G	A	0.00750556	4.4273	9.542e-06	-4.87195	1.105e-06	CRHR1-IT1:CRHR1:RP11-105N13.4	0:0:0	ncRNA_intronic	6.116		4	5	1	1	0
17	17	44210933	rs7207582	43710371	rs16940633	0.96339	rs7207582	A	G	0.00751139	4.42707	9.552e-06	-4.87053	1.113e-06	CRHR1-IT1:CRHR1:RP11-105N13.4	0:0:0	ncRNA_intronic	3.408	5	4	5	1	1	1
17	17	44210933	rs7207582	43710384	rs17686610	0.96339	rs7207582	C	A	0.00750556	4.4273	9.542e-06	-4.86666	1.135e-06	CRHR1-IT1:CRHR1:RP11-105N13.4	0:0:0	ncRNA_intronic	6.793	5	4	5	1	1	1
17	17	44210933	rs7207582	43711312	rs2942170	0.96339	rs7207582	T	C	0.00751139	4.42707	9.552e-06	-4.84565	1.262e-06	CRHR1-IT1:CRHR1:RP11-105N13.4	0:0:0	ncRNA_intronic	2.047		4	5	1	1	1
17	17	44210933	rs7207582	43712337	rs241045	0.96339	rs7207582	T	C	0.0073847	4.43198	9.337e-06	-4.86355	1.153e-06	CRHR1-IT1:CRHR1:RP11-105N13.4	0:0:0	ncRNA_intronic	1.364		4	5	1	1	1
17	17	44210933	rs7207582	43712464	rs241044	0.96339	rs7207582	A	G	0.00734222	4.43363	9.266e-06	-4.97747	6.442e-07	CRHR1-IT1:CRHR1:RP11-105N13.4	0:0:0	ncRNA_intronic	5.062		4	5	1	1	1
17	17	44210933	rs7207582	43712657	rs241042	0.96339	rs7207582	C	T	0.00733561	4.43389	9.255e-06	-4.80378	1.557e-06	CRHR1-IT1:CRHR1:RP11-105N13.4	0:0:0	ncRNA_intronic	2.423		4	5	1	1	1
17	17	44210933	rs7207582	43713925	rs241041	0.96339	rs7207582	G	A	0.00729457	4.43547	9.187e-06	-4.97934	6.38e-07	CRHR1-IT1:CRHR1:RP11-105N13.4	0:0:0	ncRNA_exonic	0.354		4	4	1	1	1
17	17	44210933	rs7207582	43714850	rs2942168	0.96339	rs7207582	A	G	0.00686859	4.45193	8.51e-06	-4.99933	5.753e-07	CRHR1-IT1:CRHR1:RP11-105N13.4	0:0:0	ncRNA_exonic	5.087	1f	4	4	1	1	1
17	17	44210933	rs7207582	43715018	rs2942167	0.96339	rs7207582	C	T	0.00729457	4.43547	9.187e-06	-4.99102	6.006e-07	CRHR1-IT1:CRHR1:RP11-105N13.4	0:0:0	ncRNA_exonic	3.48		4	5	1	1	1
17	17	44210933	rs7207582	43715427	rs2942166	0.958005	rs7207582	C	T	0.00842924	4.39672	1.099e-05	-4.91956	8.674e-07	CRHR1-IT1:CRHR1:RP11-105N13.4	0:0:0	ncRNA_intronic	0.231		4	5	1	1	1
17	17	44210933	rs7207582	43715924	rs117368197	0.96339	rs7207582	G	A	0.00729457	4.43547	9.187e-06	-4.88793	1.019e-06	CRHR1-IT1:CRHR1:RP11-105N13.4	0:0:0	ncRNA_intronic	8.738	6	4	5	1	1	1
17	17	44210933	rs7207582	43716885	rs413778	0.96339	rs7207582	G	A	0.007464	4.42891	9.471e-06	-4.98323	6.253e-07	CRHR1-IT1:CRHR1:RP11-105N13.4	0:0:0	ncRNA_exonic	4.949		4	5	1	1	1
17	17	44210933	rs7207582	43717131	rs389217	0.96339	rs7207582	T	C	0.00726176	4.43674	9.133e-06	-4.98997	6.039e-07	CRHR1-IT1:CRHR1:RP11-105N13.4	0:0:0	ncRNA_intronic	10.42		4	5	1	1	1
17	17	44210933	rs7207582	43717415	rs389978	0.958005	rs7207582	G	A	0.00497866	4.53424	5.781e-06	-4.88678	1.025e-06	CRHR1-IT1:CRHR1:RP11-105N13.4	0:0:0	ncRNA_intronic	0.353	7	4	5	1	1	1
17	17	44210933	rs7207582	43717803	rs439558	0.958005	rs7207582	C	T	0.00897084	4.37886	1.193e-05	-5.01782	5.226e-07	CRHR1-IT1:CRHR1:RP11-105N13.4	0:0:0	ncRNA_exonic	5.404		1	5	1	1	1
17	17	44210933	rs7207582	43718336	rs434805	0.952876	rs7207582	C	T	0.0063192	4.47308	7.71e-06	-4.7895	1.672e-06	CRHR1-IT1:CRHR1:RP11-105N13.4	0:0:0	ncRNA_exonic	0.111		5	5	1	1	1
17	17	44210933	rs7207582	43719143	rs393152	0.952876	rs7207582	G	A	0.00635159	4.47184	7.755e-06	-4.90888	9.16e-07	CRHR1-IT1:CRHR1:RP11-105N13.4	0:0:0	ncRNA_exonic	7.184	1f	5	5	1	1	1
17	17	44210933	rs7207582	43719870	rs3108317	0.96339	rs7207582	A	G	0.00730425	4.4351	9.203e-06	-4.89581	9.79e-07	CRHR1-IT1:CRHR1:RP11-105N13.4	0:0:0	ncRNA_intronic	0.185		5	5	1	1	1
17	17	44210933	rs7207582	43721457	rs1706746	0.96339	rs7207582	T	C	0.00723121	4.43793	9.083e-06	-4.90164	9.504e-07	CRHR1-IT1:CRHR1:RP11-105N13.4	0:0:0	ncRNA_intronic	0.501	6	5	15	1	1	1
17	17	44210933	rs7207582	43723189	rs413917	0.96339	rs7207582	A	G	0.00821566	4.40374	1.064e-05	-4.99189	5.979e-07	CRHR1-IT1:CRHR1:RP11-105N13.4	0:0:0	ncRNA_exonic	5.069	1f	5	15	1	1	1
17	17	44210933	rs7207582	43723462	rs3418	0.96339	rs7207582	T	C	0.00731573	4.43465	9.222e-06	-5.01285	5.363e-07	CRHR1-IT1:CRHR1:RP11-105N13.4	0:0:0	ncRNA_exonic	3.497		5	15	1	1	1
17	17	44210933	rs7207582	43723605	rs393675	0.96339	rs7207582	C	T	0.00731815	4.43456	9.226e-06	-4.90961	9.126e-07	CRHR1-IT1:CRHR1:RP11-105N13.4	0:0:0	ncRNA_exonic	10.3		5	15	1	1	1
17	17	44210933	rs7207582	43724555	rs449501	0.96339	rs7207582	A	G	0.00838103	4.3983	1.091e-05	-5.03919	4.675e-07	CRHR1-IT1:CRHR1:RP11-105N13.4	0:0:0	ncRNA_exonic	0.543		5	15	1	1	1
17	17	44210933	rs7207582	43725212	rs448830	0.96339	rs7207582	A	G	0.00728912	4.43568	9.178e-06	-5.03952	4.667e-07	CRHR1-IT1:CRHR1:RP11-105N13.4	0:0:0	ncRNA_exonic	0.419		5	15	1	1	1
17	17	44210933	rs7207582	43725684	rs434428	0.96339	rs7207582	A	G	0.0073314	4.43405	9.248e-06	-5.03736	4.72e-07	CRHR1:RP11-105N13.4	0:0	ncRNA_intronic	5.872	1f	5	15	1	1	1
17	17	44210933	rs7207582	43725762	rs434598	0.96339	rs7207582	A	G	0.0073314	4.43405	9.248e-06	-4.91825	8.732e-07	CRHR1:RP11-105N13.4	0:0	ncRNA_intronic	0.606	5	5	15	1	1	1
17	17	44210933	rs7207582	43725992	rs434971	0.96339	rs7207582	A	G	0.0073314	4.43405	9.248e-06	-4.91922	8.689e-07	CRHR1:RP11-105N13.4	0:0	ncRNA_intronic	5.203	4	5	15	1	1	1
17	17	44210933	rs7207582	43726125	rs385691	0.96339	rs7207582	C	A	0.00733681	4.43384	9.257e-06	-5.04755	4.475e-07	CRHR1:RP11-105N13.4	0:0	ncRNA_intronic	1.6		5	15	1	1	1
17	17	44210933	rs7207582	43726574	rs455028	0.96339	rs7207582	C	T	0.00733681	4.43384	9.257e-06	-4.99371	5.923e-07	CRHR1:RP11-105N13.4	0:0	ncRNA_intronic	13.12	1f	5	15	1	1	1
17	17	44210933	rs7207582	43726588	rs366858	0.96339	rs7207582	T	C	0.00737336	4.43242	9.318e-06	-5.01618	5.271e-07	CRHR1:RP11-105N13.4	0:0	ncRNA_intronic	15.14	1f	5	15	1	1	1
17	17	44210933	rs7207582	43726659	rs439945	0.806854	rs7207582	A	C	0.00551924	4.50878	6.52e-06	-4.88716	1.023e-06	CRHR1:RP11-105N13.4	0:0	ncRNA_intronic	1.405	1f	5	15	1	1	1
17	17	44210933	rs7207582	43727061	rs453997	0.96339	rs7207582	T	C	0.00723121	4.43793	9.083e-06	-5.0058	5.563e-07	CRHR1:RP11-105N13.4	0:0	ncRNA_intronic	0.03		5	15	1	1	1
17	17	44210933	rs7207582	43728137	rs422112	0.96339	rs7207582	A	G	0.00793696	4.41289	1.02e-05	-5.0087	5.48e-07	CRHR1:RP11-105N13.4	0:0	ncRNA_intronic	1.811	1f	5	15	1	1	1
17	17	44210933	rs7207582	43728376	rs417968	0.806854	rs7207582	G	A	0.00506511	4.52955	5.911e-06	-4.98225	6.285e-07	CRHR1:RP11-105N13.4	0:0	ncRNA_intronic	7.968		4	15	1	1	1
17	17	44210933	rs7207582	43729384	rs413844	0.96339	rs7207582	A	G	0.00745812	4.42914	9.461e-06	-4.92619	8.385e-07	CRHR1:RP11-105N13.4	0:0	ncRNA_intronic	0.769	6	5	14	1	1	1
17	17	44210933	rs7207582	43729432	rs647483	0.96339	rs7207582	T	C	0.00745812	4.42914	9.461e-06	-4.98654	6.147e-07	CRHR1:RP11-105N13.4	0:0	ncRNA_intronic	1.955	6	5	14	1	1	1
17	17	44210933	rs7207582	43730598	rs241038	0.96339	rs7207582	A	G	0.00738887	4.43182	9.344e-06	-4.87979	1.062e-06	CRHR1:RP11-105N13.4	0:0	ncRNA_intronic	2.082		5	14	1	1	1
17	17	44210933	rs7207582	43730636	rs241037	0.96339	rs7207582	T	G	0.00688035	4.45148	8.528e-06	-4.85846	1.183e-06	CRHR1:RP11-105N13.4	0:0	ncRNA_intronic	0.032		5	14	1	1	1
17	17	44210933	rs7207582	43731719	rs241036	0.96339	rs7207582	C	A	0.00738947	4.4318	9.345e-06	-4.92371	8.492e-07	CRHR1:RP11-105N13.4	0:0	ncRNA_intronic	10.65		5	14	1	1	1
17	17	44210933	rs7207582	43731896	rs241035	0.96339	rs7207582	T	C	0.00738887	4.43182	9.344e-06	-5.00754	5.513e-07	CRHR1:RP11-105N13.4	0:0	ncRNA_intronic	3.708		5	14	1	1	1
17	17	44210933	rs7207582	43733983	rs241033	0.96339	rs7207582	A	G	0.00700807	4.44655	8.726e-06	-5.0183	5.213e-07	CRHR1:RP11-105N13.4	0:0	ncRNA_intronic	7.521		5	14	1	1	1
17	17	44210933	rs7207582	43734145	rs241032	0.96339	rs7207582	C	T	0.00751314	4.42701	9.555e-06	-4.89207	9.978e-07	CRHR1:RP11-105N13.4	0:0	ncRNA_intronic	10.66		5	14	1	1	1
17	17	44210933	rs7207582	43734304	rs241031	0.96339	rs7207582	C	T	0.00747163	4.42862	9.484e-06	-5.01878	5.2e-07	CRHR1:RP11-105N13.4	0:0	ncRNA_intronic	3.018		5	14	1	1	1
17	17	44210933	rs7207582	43734503	rs241030	0.96339	rs7207582	G	A	0.00743041	4.43021	9.414e-06	-4.99926	5.755e-07	CRHR1:RP11-105N13.4	0:0	ncRNA_intronic	1.63		5	14	1	1	1
17	17	44210933	rs7207582	43734643	rs241029	0.96339	rs7207582	C	T	0.00747163	4.42862	9.484e-06	-4.91942	8.68e-07	CRHR1:RP11-105N13.4	0:0	ncRNA_intronic	2.406		5	14	1	1	1
17	17	44210933	rs7207582	43735276	rs241028	0.96339	rs7207582	T	C	0.00819703	4.40435	1.061e-05	-4.88929	1.012e-06	CRHR1:RP11-105N13.4	0:0	ncRNA_intronic	1.897		5	14	1	1	1
17	17	44210933	rs7207582	43735478	rs241027	0.96339	rs7207582	G	A	0.00736679	4.43268	9.307e-06	-5.00799	5.5e-07	CRHR1:RP11-105N13.4	0:0	ncRNA_intronic	3.464		5	14	1	1	1
17	17	44210933	rs7207582	43735555	rs241026	0.96339	rs7207582	A	G	0.00737277	4.43245	9.317e-06	-5.01142	5.403e-07	CRHR1:RP11-105N13.4	0:0	ncRNA_intronic	3.636		5	14	1	1	1
17	17	44210933	rs7207582	43736763	rs241024	0.96339	rs7207582	T	C	0.00711857	4.44228	8.901e-06	-4.92761	8.324e-07	CRHR1:RP11-105N13.4	0:0	ncRNA_intronic	7.619		5	14	1	1	1
17	17	44210933	rs7207582	43737040	rs241023	0.96339	rs7207582	A	G	0.00741501	4.43081	9.388e-06	-5.01292	5.361e-07	CRHR1:RP11-105N13.4	0:0	ncRNA_intronic	2.576		5	14	1	1	1
17	17	44210933	rs7207582	43737730	rs241022	0.96339	rs7207582	C	T	0.0074079	4.43109	9.376e-06	-5.03817	4.7e-07	CRHR1:RP11-105N13.4	0:0	ncRNA_intronic	3.329		5	14	1	1	1
17	17	44210933	rs7207582	43738627	rs241021	0.96339	rs7207582	G	T	0.00715596	4.44084	8.961e-06	-5.00611	5.554e-07	CRHR1:RP11-105N13.4	0:0	ncRNA_intronic	0.327		7	14	1	1	1
17	17	44210933	rs7207582	43738676	rs241020	0.96339	rs7207582	A	C	0.00763515	4.42278	9.744e-06	-5.03358	4.814e-07	CRHR1:RP11-105N13.4	0:0	ncRNA_intronic	0.134		7	14	1	1	1
17	17	44210933	rs7207582	43740565	rs1724409	0.806854	rs7207582	G	T	0.00469414	4.54967	5.373e-06	-4.8563	1.196e-06	CRHR1:RP11-105N13.4	0:0	ncRNA_intronic	7.098		5	14	1	1	0
17	17	44210933	rs7207582	43740856	rs62053939	0.96339	rs7207582	T	C	0.00734222	4.43363	9.266e-06	-4.80597	1.54e-06	CRHR1:RP11-105N13.4	0:0	ncRNA_intronic	0.044	7	5	14	1	1	0
17	17	44210933	rs7207582	43740967	rs111273167	0.96339	rs7207582	T	C	0.00749564	4.42768	9.525e-06	-5.00176	5.681e-07	CRHR1:RP11-105N13.4	0:0	ncRNA_intronic	6.087	7	5	14	1	1	0
17	17	44210933	rs7207582	43741028	rs62053940	0.96339	rs7207582	G	A	0.00749505	4.42771	9.524e-06	-4.92658	8.368e-07	CRHR1:RP11-105N13.4	0:0	ncRNA_intronic	6.486	6	5	14	1	1	0
17	17	44210933	rs7207582	43741452	rs17760577	0.96339	rs7207582	T	C	0.00692648	4.4497	8.599e-06	-5.02863	4.94e-07	CRHR1:RP11-105N13.4	0:0	ncRNA_intronic	0.315	1f	5	14	1	1	0
17	17	44210933	rs7207582	43743045	rs17760631	0.96339	rs7207582	C	T	0.00753639	4.4261	9.595e-06	-5.0357	4.761e-07	CRHR1:RP11-105N13.4	0:0	ncRNA_intronic	4.503	1f	5	14	1	1	0
17	17	44210933	rs7207582	43744990	rs17687462	0.96339	rs7207582	T	C	0.00751139	4.42707	9.552e-06	-4.90708	9.244e-07	CRHR1:RP11-105N13.4	0:0	ncRNA_intronic	0.607	1f	5	14	1	1	0
17	17	44210933	rs7207582	43746276	rs17760733	0.95829	rs7207582	T	G	0.0073302	4.43409	9.246e-06	-5.07154	3.946e-07	CRHR1:RP11-105N13.4	0:0	ncRNA_intronic	0.132	6	5	14	1	1	0
17	17	44210933	rs7207582	43746721	rs17687504	0.96339	rs7207582	G	A	0.00751372	4.42698	9.556e-06	-5.02308	5.085e-07	CRHR1:RP11-105N13.4	0:0	ncRNA_intronic	4.93	6	5	14	1	1	0
17	17	44210933	rs7207582	43746839	rs62053945	0.96339	rs7207582	C	T	0.00751372	4.42698	9.556e-06	-4.90967	9.123e-07	CRHR1:RP11-105N13.4	0:0	ncRNA_intronic	3.007	6	5	14	1	1	0
17	17	44210933	rs7207582	43747615	rs1724407	0.845957	rs7207582	C	T	0.00960752	4.36011	1.3e-05	-4.50649	6.591e-06	CRHR1:RP11-105N13.4	0:0	ncRNA_intronic	6.937		5	14	1	1	0
17	17	44210933	rs7207582	43747677	rs62053946	0.96339	rs7207582	T	C	0.00755406	4.42543	9.625e-06	-4.79058	1.663e-06	CRHR1:RP11-105N13.4	0:0	ncRNA_intronic	6.772	7	5	14	1	1	0
17	17	44210933	rs7207582	43747683	rs62053947	0.96339	rs7207582	A	G	0.00755406	4.42543	9.625e-06	-4.89085	1.004e-06	CRHR1:RP11-105N13.4	0:0	ncRNA_intronic	8.238	7	5	14	1	1	0
17	17	44210933	rs7207582	43748046	rs62053948	0.96339	rs7207582	T	C	0.00755406	4.42543	9.625e-06	-4.95106	7.381e-07	CRHR1:RP11-105N13.4	0:0	ncRNA_intronic	4.733	7	5	14	1	1	0
17	17	44210933	rs7207582	43748101	rs62053949	0.96339	rs7207582	G	A	0.00755475	4.42541	9.626e-06	-4.90811	9.196e-07	CRHR1:RP11-105N13.4	0:0	ncRNA_intronic	2.916	7	5	14	1	1	0
17	17	44210933	rs7207582	43748412	rs62053950	0.96339	rs7207582	G	A	0.00755475	4.42541	9.626e-06	-4.89662	9.75e-07	CRHR1:RP11-105N13.4	0:0	ncRNA_intronic	2.616	5	5	14	1	1	0
17	17	44210933	rs7207582	43749261	rs62053952	0.96339	rs7207582	C	T	0.007431	4.43019	9.415e-06	-4.90185	9.494e-07	CRHR1:RP11-105N13.4	0:0	ncRNA_intronic	2.212	5	5	14	1	1	0
17	17	44210933	rs7207582	43749454	rs62053953	0.96339	rs7207582	A	G	0.00760392	4.4238	9.698e-06	-4.87502	1.088e-06	CRHR1:RP11-105N13.4	0:0	ncRNA_intronic	8.663	5	6	14	1	1	0
17	17	44210933	rs7207582	43749579	rs17687534	0.96339	rs7207582	C	T	0.00755475	4.42541	9.626e-06	-5.00264	5.655e-07	CRHR1:RP11-105N13.4	0:0	ncRNA_intronic	0.832	1f	6	14	1	1	0
17	17	44210933	rs7207582	43749942	rs1631850	0.845957	rs7207582	A	G	0.00952332	4.36247	1.286e-05	-4.45709	8.308e-06	CRHR1:RP11-105N13.4	0:0	ncRNA_intronic	4.924		5	14	1	1	0
17	17	44210933	rs7207582	43749949	rs62053954	0.96339	rs7207582	A	G	0.00760392	4.4238	9.698e-06	-4.77669	1.782e-06	CRHR1:RP11-105N13.4	0:0	ncRNA_intronic	4.777	3a	5	14	1	1	0
17	17	44210933	rs7207582	43749980	rs62053955	0.96339	rs7207582	C	T	0.00760937	4.42362	9.706e-06	-4.86771	1.129e-06	CRHR1:RP11-105N13.4	0:0	ncRNA_intronic	1.758	4	5	14	1	1	0
17	17	44210933	rs7207582	43750010	rs17687571	0.96339	rs7207582	A	G	0.00814708	4.40599	1.053e-05	-5.0131	5.356e-07	CRHR1:RP11-105N13.4	0:0	ncRNA_intronic	2.789	1f	5	14	1	1	0
17	17	44210933	rs7207582	43750172	rs1630095	0.845957	rs7207582	G	A	0.00933978	4.36763	1.256e-05	-4.6293	3.669e-06	CRHR1:RP11-105N13.4	0:0	ncRNA_intronic	0.299		5	14	1	1	0
17	17	44210933	rs7207582	43750238	rs17687625	0.96339	rs7207582	G	A	0.00760937	4.42362	9.706e-06	-4.88222	1.049e-06	CRHR1:RP11-105N13.4	0:0	ncRNA_exonic	3.272	1f	5	14	1	1	0
17	17	44210933	rs7207582	43750315	rs62053956	0.96339	rs7207582	G	A	0.00760937	4.42362	9.706e-06	-4.89618	9.772e-07	CRHR1:RP11-105N13.4	0:0	ncRNA_intronic	1.341	5	5	14	1	1	0
17	17	44210933	rs7207582	43750910	rs4792824	0.845957	rs7207582	C	T	0.00944432	4.3647	1.273e-05	-4.58922	4.449e-06	CRHR1:RP11-105N13.4	0:0	ncRNA_intronic	1.449	6	5	14	1	1	0
17	17	44210933	rs7207582	43750939	rs62053957	0.96339	rs7207582	C	T	0.00760937	4.42362	9.706e-06	-4.76389	1.899e-06	CRHR1:RP11-105N13.4	0:0	ncRNA_intronic	5.452	7	5	14	1	1	0
17	17	44210933	rs7207582	43751913	rs1635291	0.845957	rs7207582	G	A	0.0087056	4.38762	1.146e-05	-4.74647	2.07e-06	CRHR1:RP11-105N13.4	0:0	ncRNA_intronic	4.098		5	14	1	1	0
17	17	44210933	rs7207582	43752039	rs62055661	0.96339	rs7207582	T	C	0.00760392	4.4238	9.698e-06	-4.77919	1.76e-06	CRHR1:RP11-105N13.4	0:0	ncRNA_intronic	1.834	7	5	14	1	1	0
17	17	44210933	rs7207582	43752566	rs62055662	0.96339	rs7207582	T	C	0.00760392	4.4238	9.698e-06	-4.9063	9.281e-07	CRHR1:RP11-105N13.4	0:0	ncRNA_intronic	4.305	5	5	14	1	1	0
17	17	44210933	rs7207582	43753454	rs62055663	0.96339	rs7207582	G	A	0.00760937	4.42362	9.706e-06	-4.9051	9.338e-07	CRHR1:RP11-105N13.4	0:0	ncRNA_intronic	11.5	5	5	14	1	1	0
17	17	44210933	rs7207582	43753642	rs62055664	0.96339	rs7207582	G	A	0.00760937	4.42362	9.706e-06	-4.89529	9.816e-07	CRHR1:RP11-105N13.4	0:0	ncRNA_intronic	7.57	7	5	14	1	1	0
17	17	44210933	rs7207582	43754010	rs76717812	0.96339	rs7207582	C	T	0.00760937	4.42362	9.706e-06	-4.91503	8.877e-07	CRHR1:RP11-105N13.4	0:0	ncRNA_intronic	2.846	5	5	14	1	1	0
17	17	44210933	rs7207582	43754099	rs17687667	0.96339	rs7207582	A	G	0.00802054	4.41015	1.033e-05	-5.0272	4.977e-07	CRHR1:RP11-105N13.4	0:0	ncRNA_intronic	4.699	1f	5	14	1	1	0
17	17	44210933	rs7207582	43754505	rs62055665	0.96339	rs7207582	C	A	0.00760937	4.42362	9.706e-06	-4.92747	8.33e-07	CRHR1:RP11-105N13.4	0:0	ncRNA_intronic	2.571	5	5	14	1	1	0
17	17	44210933	rs7207582	43754569	rs62055689	0.96339	rs7207582	A	G	0.00760392	4.4238	9.698e-06	-4.90057	9.556e-07	CRHR1:RP11-105N13.4	0:0	ncRNA_intronic	1.313	7	5	14	1	1	0
17	17	44210933	rs7207582	43754850	rs62055691	0.96339	rs7207582	C	T	0.00748394	4.42814	9.505e-06	-4.90476	9.354e-07	CRHR1:RP11-105N13.4	0:0	ncRNA_intronic	2.998	7	5	14	1	1	0
17	17	44210933	rs7207582	43755857	rs1724401	0.845957	rs7207582	C	A	0.00875722	4.38591	1.155e-05	-4.66993	3.013e-06	CRHR1:RP11-105N13.4	0:0	ncRNA_intronic	0.981		5	14	1	1	0
17	17	44210933	rs7207582	43755871	rs1724400	0.845957	rs7207582	A	C	0.00851278	4.39397	1.113e-05	-4.72168	2.339e-06	CRHR1:RP11-105N13.4	0:0	ncRNA_intronic	3.23	6	5	14	1	1	0
17	17	44210933	rs7207582	43756340	rs74398257	0.96339	rs7207582	C	T	0.00723244	4.43788	9.085e-06	-4.7641	1.897e-06	CRHR1:RP11-105N13.4	0:0	ncRNA_intronic	5.517	5	5	14	1	1	0
17	17	44210933	rs7207582	43756466	rs757503	0.958005	rs7207582	C	T	0.00689338	4.45098	8.548e-06	-5.03948	4.668e-07	CRHR1:RP11-105N13.4	0:0	ncRNA_intronic	3.258		5	14	1	1	0
17	17	44210933	rs7207582	43756506	rs757502	0.96339	rs7207582	T	C	0.00731573	4.43465	9.222e-06	-5.0427	4.59e-07	CRHR1:RP11-105N13.4	0:0	ncRNA_intronic	0.91		5	14	1	1	0
17	17	44210933	rs7207582	43756685	rs757501	0.96339	rs7207582	G	A	0.00752477	4.42655	9.575e-06	-5.03454	4.79e-07	CRHR1:RP11-105N13.4	0:0	ncRNA_intronic	3.173		5	14	1	1	0
17	17	44210933	rs7207582	43756833	rs757500	0.96339	rs7207582	A	C	0.0075271	4.42646	9.579e-06	-5.02917	4.926e-07	CRHR1:RP11-105N13.4	0:0	ncRNA_intronic	7.311		5	14	1	1	0
17	17	44210933	rs7207582	43756910	rs62055693	0.958005	rs7207582	C	T	0.00825277	4.40252	1.07e-05	-4.90497	9.344e-07	CRHR1:RP11-105N13.4	0:0	ncRNA_intronic	15.6	4	5	14	1	1	0
17	17	44210933	rs7207582	43756969	rs1635288	0.850381	rs7207582	A	G	0.00883673	4.38329	1.169e-05	-4.51877	6.22e-06	CRHR1:RP11-105N13.4	0:0	ncRNA_intronic	7.732		5	14	1	1	0
17	17	44210933	rs7207582	43757161	rs78487840	0.96339	rs7207582	T	C	0.0074162	4.43076	9.39e-06	-4.9056	9.314e-07	CRHR1:RP11-105N13.4	0:0	ncRNA_intronic	1.011	4	5	14	1	1	0
17	17	44210933	rs7207582	43757450	rs55974014	0.90164	rs7207582	A	C	0.0148085	4.2329	2.307e-05	-4.75607	1.974e-06	CRHR1:RP11-105N13.4	0:0	ncRNA_intronic	0.613	5	5	14	1	1	0
17	17	44210933	rs7207582	43758078	rs112155389	0.96339	rs7207582	A	G	0.00745812	4.42914	9.461e-06	-4.89869	9.648e-07	CRHR1:RP11-105N13.4	0:0	ncRNA_intronic	1.646	7	5	14	1	1	0
17	17	44210933	rs7207582	43758148	rs62055697	0.96339	rs7207582	T	C	0.00716217	4.4406	8.971e-06	-4.91131	9.047e-07	CRHR1:RP11-105N13.4	0:0	ncRNA_intronic	2.759	7	5	14	1	1	0
17	17	44210933	rs7207582	43758238	rs62055698	0.96339	rs7207582	T	C	0.00745812	4.42914	9.461e-06	-4.92341	8.505e-07	CRHR1:RP11-105N13.4	0:0	ncRNA_intronic	1.014	7	5	14	1	1	0
17	17	44210933	rs7207582	43758382	rs17761046	0.96339	rs7207582	C	T	0.00746106	4.42903	9.466e-06	-5.03168	4.862e-07	CRHR1:RP11-105N13.4	0:0	ncRNA_intronic	1.491	1f	5	14	1	1	0
17	17	44210933	rs7207582	43758742	rs62055700	0.96339	rs7207582	C	T	0.00746106	4.42903	9.466e-06	-4.88832	1.017e-06	CRHR1:RP11-105N13.4	0:0	ncRNA_intronic	7.59	5	5	14	1	1	0
17	17	44210933	rs7207582	43758787	rs62055701	0.96339	rs7207582	A	G	0.00745812	4.42914	9.461e-06	-4.92533	8.422e-07	CRHR1:RP11-105N13.4	0:0	ncRNA_intronic	3.118	5	5	14	1	1	0
17	17	44210933	rs7207582	43758790	rs62055702	0.96339	rs7207582	T	C	0.00745812	4.42914	9.461e-06	-4.91509	8.874e-07	CRHR1:RP11-105N13.4	0:0	ncRNA_intronic	2.717	5	5	14	1	1	0
17	17	44210933	rs7207582	43758885	rs112431991	0.96339	rs7207582	G	A	0.00746106	4.42903	9.466e-06	-5.00758	5.512e-07	CRHR1:RP11-105N13.4	0:0	ncRNA_intronic	1.009	5	5	14	1	1	0
17	17	44210933	rs7207582	43758898	rs57222984	0.850381	rs7207582	G	A	0.0108793	4.32418	1.531e-05	-4.70028	2.598e-06	CRHR1:RP11-105N13.4	0:0	ncRNA_intronic	0.076	5	5	14	1	1	0
17	17	44210933	rs7207582	43759048	rs17687838	0.96339	rs7207582	C	T	0.00746106	4.42903	9.466e-06	-5.04113	4.628e-07	CRHR1:RP11-105N13.4	0:0	ncRNA_intronic	14.09	1f	5	14	1	1	0
17	17	44210933	rs7207582	43759426	rs76333921	0.96339	rs7207582	T	C	0.00685287	4.45254	8.486e-06	-4.94941	7.444e-07	CRHR1:RP11-105N13.4	0:0	ncRNA_intronic	1.68	5	5	14	1	1	0
17	17	44210933	rs7207582	43759431	rs76453925	0.96339	rs7207582	T	C	0.00685287	4.45254	8.486e-06	-4.91216	9.008e-07	CRHR1:RP11-105N13.4	0:0	ncRNA_intronic	1.259	5	5	14	1	1	0
17	17	44210933	rs7207582	43759719	rs17687849	0.96339	rs7207582	G	A	0.00848306	4.39495	1.108e-05	-5.0494	4.432e-07	CRHR1:RP11-105N13.4	0:0	ncRNA_intronic	6.685	1f	5	14	1	1	0
17	17	44210933	rs7207582	43760080	rs56400821	0.947827	rs7207582	A	C	0.00914552	4.37309	1.225e-05	-4.87411	1.093e-06	CRHR1:RP11-105N13.4	0:0	ncRNA_intronic	0.431	6	5	14	1	1	0
17	17	44210933	rs7207582	43760192	rs112169475	0.96339	rs7207582	G	A	0.00746106	4.42903	9.466e-06	-4.96309	6.938e-07	CRHR1:RP11-105N13.4	0:0	ncRNA_intronic	3.703	7	5	14	1	1	0
17	17	44210933	rs7207582	43760199	rs113728380	0.96339	rs7207582	T	C	0.00750031	4.4275	9.533e-06	-4.94073	7.783e-07	CRHR1:RP11-105N13.4	0:0	ncRNA_intronic	2.131	6	5	14	1	1	0
17	17	44210933	rs7207582	43760389	rs17761100	0.96339	rs7207582	G	A	0.00746106	4.42903	9.466e-06	-5.02217	5.109e-07	CRHR1:RP11-105N13.4	0:0	ncRNA_intronic	5.107	6	5	14	1	1	0
17	17	44210933	rs7207582	43760577	rs62055704	0.96339	rs7207582	A	G	0.00750031	4.4275	9.533e-06	-4.92747	8.33e-07	CRHR1:RP11-105N13.4	0:0	ncRNA_intronic	2.511	7	5	14	1	1	0
17	17	44210933	rs7207582	43760599	rs62055705	0.96339	rs7207582	C	A	0.00746106	4.42903	9.466e-06	-4.93251	8.118e-07	CRHR1:RP11-105N13.4	0:0	ncRNA_intronic	1.564	6	5	14	1	1	0
17	17	44210933	rs7207582	43760685	rs62055706	0.96339	rs7207582	C	T	0.00750206	4.42744	9.536e-06	-4.92964	8.238e-07	CRHR1:RP11-105N13.4	0:0	ncRNA_intronic	1.101	6	5	14	1	1	0
17	17	44210933	rs7207582	43761381	rs75115093	0.96339	rs7207582	G	A	0.0073972	4.4315	9.358e-06	-4.89286	9.938e-07	CRHR1:RP11-105N13.4	0:0	ncRNA_intronic	3.91	7	5	14	1	1	0
17	17	44210933	rs7207582	43761482	rs62055707	0.96339	rs7207582	C	T	0.0073972	4.4315	9.358e-06	-4.91483	8.886e-07	CRHR1:RP11-105N13.4	0:0	ncRNA_intronic	2.944	5	5	14	1	1	0
17	17	44210933	rs7207582	43761519	rs16941035	0.850381	rs7207582	G	T	0.0108488	4.32505	1.525e-05	-4.65864	3.183e-06	CRHR1:RP11-105N13.4	0:0	ncRNA_intronic	1.487	1f	5	14	1	1	0
17	17	44210933	rs7207582	43761565	rs16941038	0.850381	rs7207582	C	T	0.0108488	4.32505	1.525e-05	-4.76981	1.844e-06	CRHR1:RP11-105N13.4	0:0	ncRNA_intronic	8.044	1f	5	14	1	1	0
17	17	44210933	rs7207582	43761856	rs2049515	0.96339	rs7207582	T	C	0.00710292	4.44289	8.876e-06	-5.05266	4.357e-07	CRHR1:RP11-105N13.4	0:0	ncRNA_intronic	11.59	1f	5	14	1	1	0
17	17	44210933	rs7207582	43761974	rs62055708	0.96339	rs7207582	A	C	0.00739958	4.43141	9.362e-06	-4.94123	7.763e-07	CRHR1:RP11-105N13.4	0:0	ncRNA_intronic	3.436	5	5	14	1	1	0
17	17	44210933	rs7207582	43762255	rs17761207	0.96339	rs7207582	C	T	0.00693424	4.4494	8.611e-06	-5.03821	4.699e-07	CRHR1:RP11-105N13.4	0:0	ncRNA_intronic	0.314	6	5	14	1	1	0
17	17	44210933	rs7207582	43762429	rs62055709	0.96339	rs7207582	T	C	0.00766825	4.42169	9.793e-06	-4.91027	9.095e-07	CRHR1:RP11-105N13.4	0:0	ncRNA_intronic	2.532	6	5	14	1	1	0
17	17	44210933	rs7207582	43762554	rs62055711	0.96339	rs7207582	G	A	0.0073972	4.4315	9.358e-06	-4.96526	6.861e-07	CRHR1:RP11-105N13.4	0:0	ncRNA_intronic	5.85	7	5	14	1	1	0
17	17	44210933	rs7207582	43762846	rs2040846	0.96339	rs7207582	G	A	0.00747926	4.42832	9.497e-06	-5.04383	4.563e-07	CRHR1:RP11-105N13.4	0:0	ncRNA_intronic	0.921		5	14	1	1	0
17	17	44210933	rs7207582	43763007	rs4486953	0.96339	rs7207582	C	T	0.0073972	4.4315	9.358e-06	-5.02008	5.165e-07	CRHR1:RP11-105N13.4	0:0	ncRNA_intronic	3.9	6	5	14	1	1	0
17	17	44210933	rs7207582	43763202	rs17688032	0.96339	rs7207582	A	G	0.00739958	4.43141	9.362e-06	-5.03895	4.681e-07	CRHR1:RP11-105N13.4	0:0	ncRNA_intronic	7.072	1f	5	14	1	1	0
17	17	44210933	rs7207582	43763241	rs17688056	0.96339	rs7207582	T	C	0.00739958	4.43141	9.362e-06	-5.02616	5.004e-07	CRHR1:RP11-105N13.4	0:0	ncRNA_intronic	0.008	6	5	14	1	1	0
17	17	44210933	rs7207582	43763935	rs17688068	0.96339	rs7207582	G	A	0.00718693	4.43964	9.011e-06	-4.99505	5.882e-07	CRHR1:RP11-105N13.4	0:0	ncRNA_intronic	6.541	1f	2	14	1	1	0
17	17	44210933	rs7207582	43764378	rs77220413	0.96339	rs7207582	A	G	0.00739958	4.43141	9.362e-06	-4.91192	9.019e-07	CRHR1:RP11-105N13.4	0:0	ncRNA_intronic	0.669	6	5	14	1	1	0
17	17	44210933	rs7207582	43764565	rs62055712	0.96339	rs7207582	G	A	0.0073972	4.4315	9.358e-06	-4.92435	8.464e-07	CRHR1:RP11-105N13.4	0:0	ncRNA_intronic	2.833	6	5	14	1	1	0
17	17	44210933	rs7207582	43764685	rs62055713	0.96339	rs7207582	T	C	0.00739958	4.43141	9.362e-06	-4.91947	8.678e-07	CRHR1:RP11-105N13.4	0:0	ncRNA_intronic	4.525	7	5	14	1	1	0
17	17	44210933	rs7207582	43764796	rs62055714	0.958195	rs7207582	T	G	0.00752419	4.42658	9.574e-06	-4.91019	9.099e-07	CRHR1:RP11-105N13.4	0:0	ncRNA_intronic	13.3	5	5	14	1	1	0
17	17	44210933	rs7207582	43764847	rs62055715	0.96339	rs7207582	A	G	0.00739958	4.43141	9.362e-06	-4.91142	9.042e-07	CRHR1:RP11-105N13.4	0:0	ncRNA_intronic	16.56	5	5	14	1	1	0
17	17	44210933	rs7207582	43764987	rs17688090	0.96339	rs7207582	A	G	0.00739958	4.43141	9.362e-06	-5.02987	4.908e-07	CRHR1:RP11-105N13.4	0:0	ncRNA_intronic	0.77	1f	5	14	1	1	0
17	17	44210933	rs7207582	43765080	rs17688126	0.96339	rs7207582	G	A	0.0073972	4.4315	9.358e-06	-4.90234	9.47e-07	CRHR1:RP11-105N13.4	0:0	ncRNA_intronic	0.746	5	5	14	1	1	0
17	17	44210933	rs7207582	43765450	rs17761387	0.96339	rs7207582	A	G	0.00743808	4.42992	9.427e-06	-5.02232	5.105e-07	CRHR1:RP11-105N13.4	0:0	ncRNA_intronic	4.225	1f	7	14	1	1	0
17	17	44210933	rs7207582	43765778	rs62055716	0.96339	rs7207582	T	C	0.00739958	4.43141	9.362e-06	-4.9093	9.14e-07	CRHR1:RP11-105N13.4	0:0	ncRNA_intronic	1.355	4	7	14	1	1	0
17	17	44210933	rs7207582	43765881	rs6503443	0.850381	rs7207582	C	T	0.0114751	4.30913	1.639e-05	-4.71909	2.369e-06	CRHR1:RP11-105N13.4	0:0	ncRNA_intronic	1.599	1f	7	14	1	1	0
17	17	44210933	rs7207582	43766415	rs62055717	0.95829	rs7207582	G	A	0.0082958	4.40111	1.077e-05	-4.84978	1.236e-06	CRHR1:RP11-105N13.4	0:0	ncRNA_intronic	6.551	5	7	14	1	1	0
17	17	44210933	rs7207582	43766418	rs62055718	0.95829	rs7207582	T	C	0.00861281	4.39067	1.13e-05	-4.87556	1.085e-06	CRHR1:RP11-105N13.4	0:0	ncRNA_intronic	3.548	5	7	14	1	1	0
17	17	44210933	rs7207582	43766754	rs17688249	0.96339	rs7207582	T	C	0.00754276	4.42586	9.606e-06	-4.91137	9.044e-07	CRHR1:RP11-105N13.4	0:0	ncRNA_intronic	2.173	4	7	14	1	1	0
17	17	44210933	rs7207582	43767219	rs2040844	0.96339	rs7207582	C	A	0.00735602	4.43309	9.289e-06	-4.90745	9.227e-07	CRHR1:RP11-105N13.4	0:0	ncRNA_intronic	8.175		7	14	1	1	0
17	17	44210933	rs7207582	43767538	rs62055751	0.96339	rs7207582	G	A	0.00754102	4.42592	9.603e-06	-4.87776	1.073e-06	CRHR1:RP11-105N13.4	0:0	ncRNA_intronic	9.397	5	7	14	1	1	0
17	17	44210933	rs7207582	43767628	rs62055752	0.96339	rs7207582	A	G	0.00735722	4.43305	9.291e-06	-4.89322	9.92e-07	CRHR1:RP11-105N13.4	0:0	ncRNA_intronic	0.699	5	7	13	1	1	0
17	17	44210933	rs7207582	43767631	rs62055753	0.96339	rs7207582	A	G	0.00735722	4.43305	9.291e-06	-4.89967	9.6e-07	CRHR1:RP11-105N13.4	0:0	ncRNA_intronic	1.134	5	7	13	1	1	0
17	17	44210933	rs7207582	43767773	rs7215239	0.850381	rs7207582	C	T	0.0105314	4.33404	1.464e-05	-4.76807	1.86e-06	CRHR1:RP11-105N13.4	0:0	ncRNA_intronic	0.068	1f	7	13	1	1	0
17	17	44210933	rs7207582	43767815	rs17688296	0.96339	rs7207582	T	C	0.00735722	4.43305	9.291e-06	-4.96295	6.943e-07	CRHR1:RP11-105N13.4	0:0	ncRNA_intronic	1.385	1f	7	13	1	1	0
17	17	44210933	rs7207582	43768346	rs78471340	0.96339	rs7207582	A	G	0.00735722	4.43305	9.291e-06	-4.86355	1.153e-06	CRHR1:RP11-105N13.4	0:0	ncRNA_intronic	0.742		7	13	1	1	0
17	17	44210933	rs7207582	43768347	rs78052495	0.96339	rs7207582	T	C	0.00735722	4.43305	9.291e-06	-4.81746	1.454e-06	CRHR1:RP11-105N13.4	0:0	ncRNA_intronic	10.67		7	13	1	1	0
17	17	44210933	rs7207582	43768467	rs56100013	0.96339	rs7207582	T	C	0.00735722	4.43305	9.291e-06	-4.90042	9.563e-07	CRHR1:RP11-105N13.4	0:0	ncRNA_intronic	0.268	5	7	13	1	1	0
17	17	44210933	rs7207582	43768496	rs55980621	0.96339	rs7207582	T	C	0.00687969	4.45151	8.527e-06	-4.86982	1.117e-06	CRHR1:RP11-105N13.4	0:0	ncRNA_intronic	1.761	5	7	13	1	1	0
17	17	44210933	rs7207582	43768501	rs55669046	0.96339	rs7207582	T	C	0.00735722	4.43305	9.291e-06	-4.88813	1.018e-06	CRHR1:RP11-105N13.4	0:0	ncRNA_intronic	1.94	5	7	13	1	1	0
17	17	44210933	rs7207582	43768633	rs56323832	0.96339	rs7207582	A	G	0.00735722	4.43305	9.291e-06	-4.83313	1.344e-06	CRHR1:RP11-105N13.4	0:0	ncRNA_intronic	2.54	5	7	13	1	1	0
17	17	44210933	rs7207582	43768703	rs55972157	0.96339	rs7207582	T	C	0.00735722	4.43305	9.291e-06	-4.87339	1.097e-06	CRHR1:RP11-105N13.4	0:0	ncRNA_intronic	4.715	5	7	13	1	1	0
17	17	44210933	rs7207582	43768727	rs56110538	0.96339	rs7207582	A	G	0.00735722	4.43305	9.291e-06	-4.89773	9.695e-07	CRHR1:RP11-105N13.4	0:0	ncRNA_intronic	2.455	5	7	13	1	1	0
17	17	44210933	rs7207582	43769088	rs17761581	0.96339	rs7207582	C	T	0.00735602	4.43309	9.289e-06	-4.90556	9.316e-07	CRHR1:RP11-105N13.4	0:0	ncRNA_intronic	3.367	7	12	14	1	1	0
17	17	44210933	rs7207582	43769321	rs56283089	0.96339	rs7207582	C	A	0.00735602	4.43309	9.289e-06	-4.88072	1.057e-06	CRHR1:RP11-105N13.4	0:0	ncRNA_intronic	0.916	5	13	14	1	1	0
17	17	44210933	rs7207582	43769516	rs56312737	0.96339	rs7207582	A	C	0.00735722	4.43305	9.291e-06	-4.88678	1.025e-06	CRHR1:RP11-105N13.4	0:0	ncRNA_intronic	0.551	6	13	14	1	1	0
17	17	44210933	rs7207582	43770416	rs74765707	0.96339	rs7207582	C	T	0.00731513	4.43468	9.221e-06	-4.88373	1.041e-06	CRHR1:RP11-105N13.4	0:0	ncRNA_intronic	5.372	5	13	14	1	1	0
17	17	44210933	rs7207582	43770443	rs62056861	0.96339	rs7207582	C	T	0.00735602	4.43309	9.289e-06	-4.88035	1.059e-06	CRHR1:RP11-105N13.4	0:0	ncRNA_intronic	1.942	5	13	14	1	1	0
17	17	44210933	rs7207582	43770525	rs62056862	0.96339	rs7207582	T	C	0.00745577	4.42923	9.457e-06	-4.8772	1.076e-06	CRHR1:RP11-105N13.4	0:0	ncRNA_intronic	9.948	7	13	14	1	1	0
17	17	44210933	rs7207582	43770595	rs62056863	0.96339	rs7207582	G	A	0.00731513	4.43468	9.221e-06	-4.87249	1.102e-06	CRHR1:RP11-105N13.4	0:0	ncRNA_intronic	3.858	7	13	14	1	1	0
17	17	44210933	rs7207582	43770712	rs7207373	0.853868	rs7207582	T	C	0.00971445	4.3571	1.318e-05	-4.63583	3.555e-06	CRHR1:RP11-105N13.4	0:0	ncRNA_intronic	0.193	6	13	14	1	1	0
17	17	44210933	rs7207582	43770995	rs62056864	0.96339	rs7207582	A	G	0.00735722	4.43305	9.291e-06	-4.87017	1.115e-06	CRHR1:RP11-105N13.4	0:0	ncRNA_intronic	2.571	7	13	14	1	1	0
17	17	44210933	rs7207582	43771193	rs62056865	0.96339	rs7207582	C	T	0.00731513	4.43468	9.221e-06	-4.87647	1.08e-06	CRHR1:RP11-105N13.4	0:0	ncRNA_intronic	0.801	6	13	14	1	1	0
17	17	44210933	rs7207582	43771493	rs62056866	0.96339	rs7207582	A	G	0.00731513	4.43468	9.221e-06	-4.89308	9.927e-07	CRHR1:RP11-105N13.4	0:0	ncRNA_intronic	9.986	7	13	14	1	1	0
17	17	44210933	rs7207582	43771627	rs62056867	0.96339	rs7207582	G	A	0.00731513	4.43468	9.221e-06	-4.87794	1.072e-06	CRHR1:RP11-105N13.4	0:0	ncRNA_intronic	3.737	6	13	14	1	1	0
17	17	44210933	rs7207582	43772018	rs56200760	0.96339	rs7207582	T	G	0.00731513	4.43468	9.221e-06	-4.87739	1.075e-06	CRHR1:RP11-105N13.4	0:0	ncRNA_intronic	1.462	7	9	14	1	1	0
17	17	44210933	rs7207582	43772109	rs17688391	0.96339	rs7207582	A	C	0.0077679	4.41843	9.942e-06	-4.94399	7.654e-07	CRHR1:RP11-105N13.4	0:0	ncRNA_intronic	5.36	6	9	14	1	1	0
17	17	44210933	rs7207582	43772251	rs17688410	0.96339	rs7207582	T	C	0.00731513	4.43468	9.221e-06	-4.99371	5.923e-07	CRHR1:RP11-105N13.4	0:0	ncRNA_intronic	5.744	6	13	14	1	1	0
17	17	44210933	rs7207582	43772407	rs55927630	0.96339	rs7207582	T	C	0.00732719	4.43421	9.241e-06	-4.89497	9.832e-07	CRHR1:RP11-105N13.4	0:0	ncRNA_intronic	0.344	7	13	14	1	1	0
17	17	44210933	rs7207582	43772540	rs17688434	0.96339	rs7207582	A	G	0.00748043	4.42827	9.499e-06	-4.98802	6.1e-07	CRHR1:RP11-105N13.4	0:0	ncRNA_intronic	10.62	6	13	14	1	1	0
17	17	44210933	rs7207582	43773085	rs17688452	0.96339	rs7207582	A	G	0.00731513	4.43468	9.221e-06	-5.00435	5.605e-07	CRHR1:RP11-105N13.4	0:0	ncRNA_intronic	11.87	6	13	14	1	1	0
17	17	44210933	rs7207582	43773124	rs10491144	0.96339	rs7207582	C	A	0.00731513	4.43468	9.221e-06	-5.06337	4.119e-07	CRHR1:RP11-105N13.4	0:0	ncRNA_intronic	4.718		13	14	1	1	0
17	17	44210933	rs7207582	43773447	rs62056869	0.96339	rs7207582	C	T	0.00731513	4.43468	9.221e-06	-4.87629	1.081e-06	CRHR1:RP11-105N13.4	0:0	ncRNA_intronic	3.157	6	13	14	1	1	0
17	17	44210933	rs7207582	43773607	rs17688511	0.958195	rs7207582	G	T	0.00754334	4.42583	9.607e-06	-4.89664	9.749e-07	CRHR1:RP11-105N13.4	0:0	ncRNA_intronic	5.577	6	13	14	1	1	0
17	17	44210933	rs7207582	43773784	rs62056870	0.96339	rs7207582	A	C	0.00731513	4.43468	9.221e-06	-4.90626	9.283e-07	CRHR1:RP11-105N13.4	0:0	ncRNA_intronic	1.395	5	13	14	1	1	0
17	17	44210933	rs7207582	43773943	rs17688558	0.96339	rs7207582	G	A	0.00731513	4.43468	9.221e-06	-4.90361	9.409e-07	CRHR1:RP11-105N13.4	0:0	ncRNA_intronic	5.789	2b	13	14	1	1	0
17	17	44210933	rs7207582	43774845	rs56391096	0.96339	rs7207582	T	C	0.00731513	4.43468	9.221e-06	-4.91465	8.894e-07	CRHR1:RP11-105N13.4	0:0	ncRNA_intronic	6.002	7	9	14	1	1	0
17	17	44210933	rs7207582	43774959	rs17761838	0.96339	rs7207582	C	T	0.00731513	4.43468	9.221e-06	-5.01314	5.355e-07	CRHR1:RP11-105N13.4	0:0	ncRNA_intronic	0.916	6	9	14	1	1	0
17	17	44210933	rs7207582	43775015	rs62056872	0.96339	rs7207582	C	T	0.00731513	4.43468	9.221e-06	-4.88203	1.05e-06	CRHR1:RP11-105N13.4	0:0	ncRNA_intronic	0.396	7	9	14	1	1	0
17	17	44210933	rs7207582	43775145	rs12150141	0.96339	rs7207582	A	G	0.00731513	4.43468	9.221e-06	-5.00384	5.62e-07	CRHR1:RP11-105N13.4	0:0	ncRNA_intronic	5.02	6	9	14	1	1	0
17	17	44210933	rs7207582	43775402	rs12150608	0.96339	rs7207582	C	T	0.00731513	4.43468	9.221e-06	-4.91261	8.987e-07	CRHR1:RP11-105N13.4	0:0	ncRNA_intronic	1.987	5	9	14	1	1	0
17	17	44210933	rs7207582	43775479	rs12150610	0.96339	rs7207582	C	T	0.00731513	4.43468	9.221e-06	-5.00101	5.703e-07	CRHR1:RP11-105N13.4	0:0	ncRNA_intronic	3.776	1f	9	14	1	1	0
17	17	44210933	rs7207582	43775546	rs12150547	0.96339	rs7207582	G	A	0.00752536	4.42653	9.576e-06	-5.02471	5.042e-07	CRHR1:RP11-105N13.4	0:0	ncRNA_intronic	3.644	1f	9	14	1	1	0
17	17	44210933	rs7207582	43776061	rs12150454	0.96339	rs7207582	T	C	0.00731513	4.43468	9.221e-06	-4.98395	6.23e-07	CRHR1:RP11-105N13.4	0:0	ncRNA_intronic	0.551	6	9	14	1	1	0
17	17	44210933	rs7207582	43776242	rs12150091	0.96339	rs7207582	G	A	0.00731513	4.43468	9.221e-06	-4.8588	1.181e-06	CRHR1:RP11-105N13.4	0:0	ncRNA_intronic	0.074	7	9	14	1	1	0
17	17	44210933	rs7207582	43776371	rs12150464	0.96339	rs7207582	T	C	0.00731513	4.43468	9.221e-06	-4.97571	6.501e-07	CRHR1:RP11-105N13.4	0:0	ncRNA_intronic	0.46	6	9	14	1	1	0
17	17	44210933	rs7207582	43776741	rs76761706	0.96339	rs7207582	C	T	0.00731513	4.43468	9.221e-06	-4.63648	3.544e-06	CRHR1:RP11-105N13.4	0:0	ncRNA_intronic	2.391		9	14	1	1	0
17	17	44210933	rs7207582	43776742	rs80143279	0.96339	rs7207582	C	T	0.00731513	4.43468	9.221e-06	-4.75191	2.015e-06	CRHR1:RP11-105N13.4	0:0	ncRNA_intronic	4.168		9	14	1	1	0
17	17	44210933	rs7207582	43776787	rs17761985	0.96339	rs7207582	T	C	0.00731513	4.43468	9.221e-06	-4.98635	6.153e-07	CRHR1:RP11-105N13.4	0:0	ncRNA_intronic	2.354	6	9	14	1	1	0
17	17	44210933	rs7207582	43776945	rs62056873	0.96339	rs7207582	C	T	0.00731513	4.43468	9.221e-06	-4.86218	1.161e-06	CRHR1:RP11-105N13.4	0:0	ncRNA_intronic	1.831	5	9	14	1	1	0
17	17	44210933	rs7207582	43777542	rs17688767	0.96339	rs7207582	G	A	0.00731513	4.43468	9.221e-06	-4.94539	7.599e-07	CRHR1:RP11-105N13.4	0:0	ncRNA_intronic	2.389	1f	7	14	1	1	0
17	17	44210933	rs7207582	43777578	rs62056874	0.96339	rs7207582	T	C	0.00731513	4.43468	9.221e-06	-4.85998	1.174e-06	CRHR1:RP11-105N13.4	0:0	ncRNA_intronic	4.106	5	7	14	1	1	0
17	17	44210933	rs7207582	43777710	rs17688773	0.96339	rs7207582	C	T	0.00752536	4.42653	9.576e-06	-5.00094	5.705e-07	CRHR1:RP11-105N13.4	0:0	ncRNA_intronic	4.212	1f	7	14	1	1	0
17	17	44210933	rs7207582	43778406	rs17688875	0.96339	rs7207582	G	A	0.00719803	4.43921	9.029e-06	-4.97018	6.689e-07	CRHR1:RP11-105N13.4	0:0	ncRNA_intronic	7.559	6	5	14	1	1	0
17	17	44210933	rs7207582	43778602	rs17762165	0.96339	rs7207582	T	C	0.00778182	4.41797	9.963e-06	-4.92417	8.472e-07	CRHR1:RP11-105N13.4	0:0	ncRNA_intronic	1.734	1f	5	14	1	1	0
17	17	44210933	rs7207582	43778752	rs62056876	0.958005	rs7207582	T	C	0.00645819	4.46774	7.905e-06	-4.87611	1.082e-06	CRHR1:RP11-105N13.4	0:0	ncRNA_intronic	3.17	6	5	14	1	1	0
17	17	44210933	rs7207582	43778828	rs62056877	0.958005	rs7207582	G	T	0.00651214	4.46567	7.982e-06	-4.91691	8.792e-07	CRHR1:RP11-105N13.4	0:0	ncRNA_intronic	8.035	5	5	14	1	1	0
17	17	44210933	rs7207582	43779351	rs17688922	0.96339	rs7207582	A	G	0.00783263	4.41631	1.004e-05	-4.99077	6.014e-07	CRHR1:RP11-105N13.4	0:0	ncRNA_intronic	2.617	6	5	14	1	1	0
17	17	44210933	rs7207582	43779624	rs1526128	0.938218	rs7207582	T	C	0.00746165	4.429	9.467e-06	-5.10505	3.307e-07	CRHR1:RP11-105N13.4	0:0	ncRNA_intronic	5.788	1f	5	14	1	1	0
17	17	44210933	rs7207582	43779657	rs1526129	0.96339	rs7207582	C	T	0.0076797	4.42132	9.81e-06	-5.00681	5.534e-07	CRHR1:RP11-105N13.4	0:0	ncRNA_intronic	5.58	1f	5	14	1	1	0
17	17	44210933	rs7207582	43780561	rs62056878	0.96339	rs7207582	T	C	0.00763651	4.42273	9.746e-06	-4.84098	1.292e-06	CRHR1:RP11-105N13.4	0:0	ncRNA_intronic	7.3	4	5	14	1	1	0
17	17	44210933	rs7207582	43780948	rs17762308	0.96339	rs7207582	C	T	0.00757665	4.42469	9.658e-06	-4.95894	7.088e-07	CRHR1:RP11-105N13.4	0:0	ncRNA_intronic	7.297	1f	5	14	1	1	0
17	17	44210933	rs7207582	43781105	rs968028	0.96339	rs7207582	G	A	0.00967897	4.35809	1.312e-05	-4.93669	7.946e-07	CRHR1:RP11-105N13.4	0:0	ncRNA_intronic	7.869		5	14	1	1	0
17	17	44210933	rs7207582	43781250	rs968027	0.96339	rs7207582	T	C	0.00933978	4.36763	1.256e-05	-4.98182	6.299e-07	CRHR1:RP11-105N13.4	0:0	ncRNA_intronic	0.943		5	14	1	1	0
17	17	44210933	rs7207582	43781426	rs62056879	0.96339	rs7207582	C	T	0.00777652	4.41815	9.955e-06	-4.84221	1.284e-06	CRHR1:RP11-105N13.4	0:0	ncRNA_intronic	4.21	4	5	14	1	1	0
17	17	44210933	rs7207582	43781505	rs79892630	0.96339	rs7207582	T	C	0.00778182	4.41797	9.963e-06	-4.85465	1.206e-06	CRHR1:RP11-105N13.4	0:0	ncRNA_intronic	0.144	5	5	14	1	1	0
17	17	44210933	rs7207582	43781778	rs17762361	0.96339	rs7207582	G	A	0.00777652	4.41815	9.955e-06	-4.95757	7.138e-07	CRHR1:RP11-105N13.4	0:0	ncRNA_intronic	6.303	6	5	14	1	1	0
17	17	44210933	rs7207582	43782304	rs62056880	0.96339	rs7207582	C	T	0.00762566	4.42309	9.73e-06	-4.88851	1.016e-06	CRHR1:RP11-105N13.4	0:0	ncRNA_intronic	14.65	7	5	14	1	1	0
17	17	44210933	rs7207582	43782455	rs62056881	0.96339	rs7207582	T	G	0.00753871	4.42601	9.599e-06	-4.87375	1.095e-06	CRHR1:RP11-105N13.4	0:0	ncRNA_intronic	7.217	6	5	14	1	1	0
17	17	44210933	rs7207582	43782492	rs17689104	0.96339	rs7207582	G	A	0.00742686	4.43035	9.408e-06	-4.99601	5.853e-07	CRHR1:RP11-105N13.4	0:0	ncRNA_intronic	14.01	6	5	14	1	1	0
17	17	44210933	rs7207582	43782558	rs17689116	0.96339	rs7207582	C	T	0.00738589	4.43194	9.339e-06	-5.00806	5.498e-07	CRHR1:RP11-105N13.4	0:0	ncRNA_intronic	10.89	6	5	14	1	1	0
17	17	44210933	rs7207582	43782693	rs62056905	0.952657	rs7207582	G	A	0.00819081	4.40456	1.06e-05	-4.90411	9.385e-07	CRHR1:RP11-105N13.4	0:0	ncRNA_intronic	1.682	4	5	14	1	1	0
17	17	44210933	rs7207582	43782708	rs62056906	0.96339	rs7207582	C	T	0.00730365	4.43512	9.202e-06	-4.89834	9.665e-07	CRHR1:RP11-105N13.4	0:0	ncRNA_intronic	5.359	4	5	14	1	1	0
17	17	44210933	rs7207582	43783803	rs62056909	0.948007	rs7207582	G	A	0.0054158	4.51349	6.377e-06	-4.95872	7.096e-07	CRHR1:RP11-105N13.4	0:0	ncRNA_intronic	1.081	6	5	14	1	1	0
17	17	44210933	rs7207582	43784222	rs62056910	0.96339	rs7207582	C	T	0.00635302	4.47178	7.757e-06	-4.90453	9.365e-07	CRHR1:RP11-105N13.4	0:0	ncRNA_intronic	2.761	4	5	14	1	1	0
17	17	44210933	rs7207582	43784624	rs62056911	0.96339	rs7207582	C	T	0.00635302	4.47178	7.757e-06	-4.89027	1.007e-06	CRHR1:RP11-105N13.4	0:0	ncRNA_intronic	2.8	5	5	14	1	1	0
17	17	44210933	rs7207582	43784948	rs62056912	0.96339	rs7207582	T	G	0.00587849	4.49242	7.042e-06	-4.90885	9.161e-07	CRHR1:RP11-105N13.4	0:0	ncRNA_intronic	1.594	6	5	14	1	1	0
17	17	44210933	rs7207582	43784994	rs62056913	0.96339	rs7207582	T	C	0.00660273	4.46218	8.113e-06	-4.93143	8.163e-07	CRHR1:RP11-105N13.4	0:0	ncRNA_intronic	1.861	7	5	14	1	1	0
17	17	44210933	rs7207582	43785349	rs61667602	0.958005	rs7207582	C	T	0.00676496	4.45593	8.353e-06	-4.95371	7.281e-07	CRHR1:RP11-105N13.4	0:0	ncRNA_intronic	3.614	6	5	14	1	1	0
17	17	44210933	rs7207582	43785808	rs17689218	0.96339	rs7207582	C	T	0.00635302	4.47178	7.757e-06	-5.01476	5.31e-07	CRHR1:RP11-105N13.4	0:0	ncRNA_intronic	5.157	1f	5	14	1	1	0
17	17	44210933	rs7207582	43785938	rs62056916	0.96339	rs7207582	T	C	0.00634728	4.472	7.749e-06	-4.88735	1.022e-06	CRHR1:RP11-105N13.4	0:0	ncRNA_intronic	3.843	5	5	14	1	1	0
17	17	44210933	rs7207582	43786013	rs62056917	0.96339	rs7207582	T	G	0.00634728	4.472	7.749e-06	-4.89105	1.003e-06	CRHR1:RP11-105N13.4	0:0	ncRNA_intronic	5.579	4	5	14	1	1	0
17	17	44210933	rs7207582	43786676	rs62056918	0.96339	rs7207582	G	T	0.00631125	4.47339	7.699e-06	-4.93644	7.956e-07	CRHR1:RP11-105N13.4	0:0	ncRNA_intronic	2.563	7	5	14	1	1	0
17	17	44210933	rs7207582	43786698	rs62056919	0.96339	rs7207582	T	C	0.00630475	4.47364	7.69e-06	-4.87849	1.069e-06	CRHR1:RP11-105N13.4	0:0	ncRNA_intronic	0.121	7	5	14	1	1	0
17	17	44210933	rs7207582	43787130	rs17762535	0.96339	rs7207582	C	T	0.00631125	4.47339	7.699e-06	-5.06612	4.06e-07	CRHR1:RP11-105N13.4	0:0	ncRNA_intronic	1.778	1f	7	14	1	1	0
17	17	44210933	rs7207582	43787226	rs62056920	0.96339	rs7207582	A	G	0.00630475	4.47364	7.69e-06	-4.92024	8.644e-07	CRHR1:RP11-105N13.4	0:0	ncRNA_intronic	7.734	4	7	14	1	1	0
17	17	44210933	rs7207582	43787306	rs62056921	0.96339	rs7207582	C	T	0.00631125	4.47339	7.699e-06	-4.93299	8.098e-07	CRHR1:RP11-105N13.4	0:0	ncRNA_intronic	0.686	3a	7	14	1	1	0
17	17	44210933	rs7207582	43788371	rs56290582	0.96339	rs7207582	T	C	0.00527772	4.51976	6.191e-06	-4.83884	1.306e-06	CRHR1:RP11-105N13.4	0:0	ncRNA_intronic	5.256	5	5	14	1	1	0
17	17	44210933	rs7207582	43788419	rs56397077	0.96339	rs7207582	A	C	0.00630475	4.47364	7.69e-06	-4.92556	8.412e-07	CRHR1:RP11-105N13.4	0:0	ncRNA_intronic	4.643	5	5	14	1	1	0
17	17	44210933	rs7207582	43788649	rs62056925	0.96339	rs7207582	C	T	0.00631125	4.47339	7.699e-06	-4.92584	8.4e-07	CRHR1:RP11-105N13.4	0:0	ncRNA_intronic	1.834	5	5	14	1	1	0
17	17	44210933	rs7207582	43788767	rs62056927	0.96339	rs7207582	A	G	0.00630475	4.47364	7.69e-06	-4.91377	8.934e-07	CRHR1:RP11-105N13.4	0:0	ncRNA_intronic	8.607	5	5	14	1	1	0
17	17	44210933	rs7207582	43788782	rs62056928	0.96339	rs7207582	T	C	0.00630475	4.47364	7.69e-06	-4.91347	8.948e-07	CRHR1:RP11-105N13.4	0:0	ncRNA_intronic	7.825	5	5	14	1	1	0
17	17	44210933	rs7207582	43789144	rs62056929	0.96339	rs7207582	A	G	0.00626189	4.47528	7.631e-06	-4.93876	7.862e-07	CRHR1:RP11-105N13.4	0:0	ncRNA_intronic	5.85	7	5	14	1	1	0
17	17	44210933	rs7207582	43789640	rs62056930	0.958005	rs7207582	C	A	0.00793696	4.41289	1.02e-05	-4.9162	8.824e-07	CRHR1:RP11-105N13.4	0:0	ncRNA_intronic	1.831	7	5	14	1	1	0
17	17	44210933	rs7207582	43789698	rs62056931	0.947878	rs7207582	A	G	0.00678358	4.45521	8.381e-06	-5.08007	3.773e-07	CRHR1:RP11-105N13.4	0:0	ncRNA_intronic	0.505	6	5	14	1	1	0
17	17	44210933	rs7207582	43789978	rs62056933	0.95829	rs7207582	A	G	0.00560571	4.50485	6.642e-06	-4.88165	1.052e-06	CRHR1:RP11-105N13.4	0:0	ncRNA_intronic	4.045	5	5	14	1	1	0
17	17	44210933	rs7207582	43790005	rs62056934	0.95829	rs7207582	G	A	0.00568992	4.50101	6.763e-06	-4.92352	8.5e-07	CRHR1:RP11-105N13.4	0:0	ncRNA_intronic	8.785	5	5	14	1	1	1
17	17	44210933	rs7207582	43790401	rs79322350	0.96339	rs7207582	G	A	0.00631125	4.47339	7.699e-06	-4.89646	9.758e-07	CRHR1:RP11-105N13.4	0:0	ncRNA_intronic	8.792	7	5	14	1	1	1
17	17	44210933	rs7207582	43790446	rs62056935	0.96339	rs7207582	G	A	0.00631125	4.47339	7.699e-06	-4.91474	8.89e-07	CRHR1:RP11-105N13.4	0:0	ncRNA_intronic	4.493	7	5	14	1	1	1
17	17	44210933	rs7207582	43790649	rs75076131	0.96339	rs7207582	A	C	0.00630475	4.47364	7.69e-06	-4.91404	8.922e-07	CRHR1:RP11-105N13.4	0:0	ncRNA_intronic	0.51	7	5	14	1	1	1
17	17	44210933	rs7207582	43791181	rs62056937	0.96339	rs7207582	C	A	0.00631125	4.47339	7.699e-06	-4.92288	8.528e-07	CRHR1:RP11-105N13.4	0:0	ncRNA_intronic	0.719	6	5	14	1	1	1
17	17	44210933	rs7207582	43791332	rs62056939	0.96339	rs7207582	C	T	0.00631125	4.47339	7.699e-06	-4.85947	1.177e-06	CRHR1:RP11-105N13.4	0:0	ncRNA_intronic	3.493	6	5	14	1	1	1
17	17	44210933	rs7207582	43791429	rs77387379	0.96339	rs7207582	A	G	0.00630475	4.47364	7.69e-06	-4.91492	8.882e-07	CRHR1:RP11-105N13.4	0:0	ncRNA_intronic	9.012	7	5	14	1	1	1
17	17	44210933	rs7207582	43791468	rs75990322	0.96339	rs7207582	C	T	0.00631125	4.47339	7.699e-06	-4.92001	8.654e-07	CRHR1:RP11-105N13.4	0:0	ncRNA_intronic	0.409		5	14	1	1	1
17	17	44210933	rs7207582	43791610	rs113661667	0.96339	rs7207582	C	T	0.00631125	4.47339	7.699e-06	-4.95511	7.229e-07	CRHR1:RP11-105N13.4	0:0	ncRNA_intronic	5.133	6	5	14	1	1	1
17	17	44210933	rs7207582	43791652	rs74579538	0.96339	rs7207582	A	G	0.00630475	4.47364	7.69e-06	-4.92067	8.625e-07	CRHR1:RP11-105N13.4	0:0	ncRNA_intronic	2.247	7	5	14	1	1	1
17	17	44210933	rs7207582	43792252	rs55973918	0.96339	rs7207582	A	C	0.00630475	4.47364	7.69e-06	-4.8929	9.936e-07	CRHR1:RP11-105N13.4	0:0	ncRNA_intronic	0.145	6	5	14	1	1	1
17	17	44210933	rs7207582	43792326	rs56220242	0.96339	rs7207582	T	C	0.00593445	4.48986	7.127e-06	-4.9015	9.511e-07	CRHR1:RP11-105N13.4	0:0	ncRNA_intronic	3.21	6	5	14	1	1	1
17	17	44210933	rs7207582	43792358	rs56160448	0.96339	rs7207582	G	A	0.00631125	4.47339	7.699e-06	-4.9104	9.089e-07	CRHR1:RP11-105N13.4	0:0	ncRNA_intronic	1.055	7	5	14	1	1	1
17	17	44210933	rs7207582	43792411	rs56167560	0.96339	rs7207582	G	A	0.00604633	4.48475	7.3e-06	-4.77523	1.795e-06	CRHR1:RP11-105N13.4	0:0	ncRNA_intronic	9.427	5	5	14	1	1	1
17	17	44210933	rs7207582	43792418	rs55849973	0.96339	rs7207582	C	T	0.00631125	4.47339	7.699e-06	-4.83373	1.34e-06	CRHR1:RP11-105N13.4	0:0	ncRNA_intronic	7.087	5	5	14	1	1	1
17	17	44210933	rs7207582	43792586	rs1880749	0.96339	rs7207582	C	A	0.00631125	4.47339	7.699e-06	-4.9263	8.38e-07	CRHR1:RP11-105N13.4	0:0	ncRNA_intronic	5.541	6	5	14	1	1	1
17	17	44210933	rs7207582	43792895	rs1568951	0.96339	rs7207582	G	T	0.00631125	4.47339	7.699e-06	-4.98638	6.152e-07	CRHR1:RP11-105N13.4	0:0	ncRNA_intronic	3.678		5	14	1	1	1
17	17	44210933	rs7207582	43792896	rs1568950	0.96339	rs7207582	C	T	0.00631125	4.47339	7.699e-06	-4.95657	7.175e-07	CRHR1:RP11-105N13.4	0:0	ncRNA_intronic	0.736		5	14	1	1	1
17	17	44210933	rs7207582	43792975	rs1568949	0.958005	rs7207582	A	G	0.00643209	4.46874	7.868e-06	-4.93253	8.117e-07	CRHR1:RP11-105N13.4	0:0	ncRNA_intronic	9.597		5	14	1	1	1
17	17	44210933	rs7207582	43793342	rs1105570	0.96339	rs7207582	G	A	0.00631125	4.47339	7.699e-06	-4.92962	8.239e-07	CRHR1:RP11-105N13.4	0:0	ncRNA_intronic	7.713		5	14	1	1	1
17	17	44210933	rs7207582	43793388	rs1105569	0.96339	rs7207582	T	C	0.00630475	4.47364	7.69e-06	-5.00716	5.524e-07	CRHR1:RP11-105N13.4	0:0	ncRNA_intronic	1.844		5	14	1	1	1
17	17	44210933	rs7207582	43793651	rs7502718	0.96339	rs7207582	A	G	0.00637379	4.47099	7.786e-06	-4.93143	8.163e-07	CRHR1:RP11-105N13.4	0:0	ncRNA_intronic	0.859	5	5	14	1	1	1
17	17	44210933	rs7207582	43793665	rs7502937	0.96339	rs7207582	G	A	0.00631125	4.47339	7.699e-06	-4.93005	8.221e-07	CRHR1:RP11-105N13.4	0:0	ncRNA_intronic	8.115	5	5	14	1	1	1
17	17	44210933	rs7207582	43793828	rs4479288	0.958005	rs7207582	A	G	0.0140922	4.24809	2.156e-05	-4.88968	1.01e-06	CRHR1:RP11-105N13.4	0:0	ncRNA_intronic	4.53	5	5	14	1	1	1
17	17	44210933	rs7207582	43793951	rs4479289	0.96339	rs7207582	A	G	0.00630475	4.47364	7.69e-06	-4.90575	9.307e-07	CRHR1:RP11-105N13.4	0:0	ncRNA_intronic	5.675	5	5	14	1	1	1
17	17	44210933	rs7207582	43794182	rs4609898	0.96339	rs7207582	A	G	0.00604185	4.48495	7.293e-06	-4.95072	7.394e-07	CRHR1:RP11-105N13.4	0:0	ncRNA_intronic	3.572	6	5	14	1	1	1
17	17	44210933	rs7207582	43794286	rs75310534	0.96339	rs7207582	T	C	0.00651771	4.46545	7.99e-06	-4.94463	7.629e-07	CRHR1:RP11-105N13.4	0:0	ncRNA_intronic	0.153	7	5	14	1	1	1
17	17	44210933	rs7207582	43795238	rs76007856	0.96339	rs7207582	A	G	0.00630475	4.47364	7.69e-06	-4.9286	8.282e-07	CRHR1:RP11-105N13.4	0:0	ncRNA_intronic	0.086	7	5	14	1	1	1
17	17	44210933	rs7207582	43795573	rs111415173	0.96339	rs7207582	T	C	0.00630475	4.47364	7.69e-06	-4.81663	1.46e-06	CRHR1:RP11-105N13.4	0:0	ncRNA_intronic	0.477	6	5	14	1	1	1
17	17	44210933	rs7207582	43795634	rs113991678	0.95829	rs7207582	T	C	0.00688426	4.45133	8.534e-06	-4.91551	8.855e-07	CRHR1:RP11-105N13.4	0:0	ncRNA_intronic	0.281	7	5	14	1	1	1
17	17	44210933	rs7207582	43795768	rs112995313	0.96339	rs7207582	C	T	0.00631125	4.47339	7.699e-06	-4.91734	8.773e-07	CRHR1:RP11-105N13.4	0:0	ncRNA_intronic	8.762	6	5	14	1	1	1
17	17	44210933	rs7207582	43797246	rs56046792	0.96339	rs7207582	T	C	0.00604185	4.48495	7.293e-06	-4.94967	7.434e-07	CRHR1:RP11-105N13.4	0:0	ncRNA_intronic	2.179	4	5	14	1	1	1
17	17	44210933	rs7207582	43798015	rs56323722	0.96339	rs7207582	C	A	0.00635302	4.47178	7.757e-06	-4.90305	9.436e-07	CRHR1:RP11-105N13.4	0:0	ncRNA_intronic	4.932	5	5	14	1	1	1
17	17	44210933	rs7207582	43798160	rs55989971	0.96339	rs7207582	A	G	0.00634728	4.472	7.749e-06	-4.93145	8.162e-07	CRHR1:RP11-105N13.4	0:0	ncRNA_intronic	0.213	5	5	14	1	1	1
17	17	44210933	rs7207582	43798401	rs62056946	0.96339	rs7207582	A	G	0.00634728	4.472	7.749e-06	-4.94514	7.609e-07	CRHR1:RP11-105N13.4	0:0	ncRNA_intronic	5.805	7	5	14	1	1	1
17	17	44210933	rs7207582	43798546	rs75403953	0.96339	rs7207582	G	A	0.00635302	4.47178	7.757e-06	-4.95204	7.344e-07	CRHR1:RP11-105N13.4	0:0	ncRNA_intronic	1.694	6	5	14	1	1	1
17	17	44210933	rs7207582	43798902	rs55838058	0.96339	rs7207582	T	C	0.00634728	4.472	7.749e-06	-4.85285	1.217e-06	CRHR1:RP11-105N13.4	0:0	ncRNA_intronic	3.237	5	5	14	1	1	1
17	17	44210933	rs7207582	43798903	rs56062621	0.96339	rs7207582	G	A	0.00635302	4.47178	7.757e-06	-4.85746	1.189e-06	CRHR1:RP11-105N13.4	0:0	ncRNA_intronic	4.67	5	5	14	1	1	1
17	17	44210933	rs7207582	43799033	rs55962674	0.96339	rs7207582	T	C	0.00634728	4.472	7.749e-06	-4.92808	8.304e-07	CRHR1:RP11-105N13.4	0:0	ncRNA_intronic	0.412	5	5	14	1	1	1
17	17	44210933	rs7207582	43799048	rs55896111	0.96339	rs7207582	A	G	0.00634728	4.472	7.749e-06	-4.88203	1.05e-06	CRHR1:RP11-105N13.4	0:0	ncRNA_intronic	4.29	5	5	14	1	1	1
17	17	44210933	rs7207582	43799052	rs55787734	0.96339	rs7207582	G	A	0.00635302	4.47178	7.757e-06	-4.94816	7.492e-07	CRHR1:RP11-105N13.4	0:0	ncRNA_intronic	5.686	5	5	14	1	1	1
17	17	44210933	rs7207582	43799509	rs55653963	0.96339	rs7207582	C	A	0.00608134	4.48315	7.355e-06	-5.00528	5.578e-07	CRHR1:RP11-105N13.4	0:0	ncRNA_intronic	4.381	4	5	14	1	1	1
17	17	44210933	rs7207582	43799667	rs62054378	0.96339	rs7207582	A	C	0.00638949	4.47038	7.808e-06	-4.95673	7.169e-07	CRHR1:RP11-105N13.4	0:0	ncRNA_intronic	4.825	2b	9	14	1	1	1
17	17	44210933	rs7207582	43799804	rs77819001	0.96339	rs7207582	A	C	0.00638949	4.47038	7.808e-06	-4.95559	7.211e-07	CRHR1:RP11-105N13.4	0:0	ncRNA_intronic	7.074	4	9	14	1	1	1
17	17	44210933	rs7207582	43800351	rs17563433	0.96339	rs7207582	C	A	0.00639447	4.47019	7.815e-06	-5.01705	5.247e-07	CRHR1:RP11-105N13.4	0:0	ncRNA_intronic	1.317	1f	13	14	1	1	0
17	17	44210933	rs7207582	43800404	rs77370070	0.96339	rs7207582	G	T	0.00639447	4.47019	7.815e-06	-4.95088	7.388e-07	CRHR1:RP11-105N13.4	0:0	ncRNA_intronic	3.781	5	13	14	1	1	0
17	17	44210933	rs7207582	43800987	rs62054380	0.96339	rs7207582	A	C	0.00638949	4.47038	7.808e-06	-4.9447	7.626e-07	CRHR1:RP11-105N13.4	0:0	ncRNA_intronic	1.539	7	9	14	1	1	0
17	17	44210933	rs7207582	43801092	rs112570965	0.96339	rs7207582	C	T	0.00639447	4.47019	7.815e-06	-4.95414	7.265e-07	CRHR1:RP11-105N13.4	0:0	ncRNA_intronic	11.18	5	9	14	1	1	0
17	17	44210933	rs7207582	43801185	rs62054381	0.958005	rs7207582	G	A	0.00654204	4.46452	8.025e-06	-4.9645	6.888e-07	CRHR1:RP11-105N13.4	0:0	ncRNA_intronic	0.362	5	9	14	1	1	0
17	17	44210933	rs7207582	43801593	rs17649019	0.96339	rs7207582	A	G	0.00650167	4.46607	7.967e-06	-5.10517	3.305e-07	CRHR1:RP11-105N13.4	0:0	ncRNA_intronic	0.383	6	9	14	1	1	0
17	17	44210933	rs7207582	43801695	rs17563501	0.96339	rs7207582	T	C	0.00621943	4.47691	7.573e-06	-5.07309	3.914e-07	CRHR1:RP11-105N13.4	0:0	ncRNA_intronic	0.634	6	9	14	1	1	0
17	17	44210933	rs7207582	43802525	rs62054382	0.96339	rs7207582	T	C	0.00638949	4.47038	7.808e-06	-5.03011	4.902e-07	CRHR1:RP11-105N13.4	0:0	ncRNA_intronic	1.37	5	9	14	1	1	0
17	17	44210933	rs7207582	43802907	rs62054383	0.96339	rs7207582	C	T	0.00687969	4.45151	8.527e-06	-4.96503	6.869e-07	CRHR1:RP11-105N13.4	0:0	ncRNA_intronic	2.444	5	9	14	1	1	0
17	17	44210933	rs7207582	43802971	rs10514879	0.96339	rs7207582	T	C	0.00634728	4.472	7.749e-06	-5.07851	3.804e-07	CRHR1:RP11-105N13.4	0:0	ncRNA_intronic	2.178		9	14	1	1	0
17	17	44210933	rs7207582	43803788	rs56280222	0.96339	rs7207582	C	T	0.00622824	4.47658	7.585e-06	-4.88278	1.046e-06	CRHR1:RP11-105N13.4	0:0	ncRNA_intronic	10.23	5	9	14	1	1	0
17	17	44210933	rs7207582	43804306	rs62054384	0.96339	rs7207582	C	T	0.00615121	4.47995	7.466e-06	-4.90768	9.216e-07	CRHR1:RP11-105N13.4	0:0	ncRNA_intronic	3.578	7	9	14	1	1	0
17	17	44210933	rs7207582	43804317	rs9897399	0.958195	rs7207582	A	G	0.00511052	4.52734	5.973e-06	-4.98469	6.206e-07	CRHR1:RP11-105N13.4	0:0	ncRNA_intronic	0.82	7	9	14	1	1	0
17	17	44210933	rs7207582	43804619	rs56380663	0.96339	rs7207582	T	C	0.00618173	4.47856	7.515e-06	-5.00149	5.689e-07	CRHR1:RP11-105N13.4	0:0	ncRNA_intronic	0.169	5	9	14	1	1	0
17	17	44210933	rs7207582	43805525	rs62054387	0.96339	rs7207582	C	A	0.0062106	4.47725	7.561e-06	-4.97243	6.612e-07	CRHR1:RP11-105N13.4	0:0	ncRNA_intronic	2.839	5	9	14	1	1	0
17	17	44210933	rs7207582	43805590	rs62054388	0.96339	rs7207582	T	C	0.00617178	4.47901	7.499e-06	-4.94026	7.802e-07	CRHR1:RP11-105N13.4	0:0	ncRNA_intronic	6.668	7	9	14	1	1	0
17	17	44210933	rs7207582	43806015	rs4401083	0.96339	rs7207582	A	G	0.00617427	4.4789	7.503e-06	-5.08214	3.732e-07	CRHR1:RP11-105N13.4	0:0	ncRNA_intronic	0.424	1f	7	14	1	1	0
17	17	44210933	rs7207582	43806264	rs1880752	0.96339	rs7207582	T	C	0.00613619	4.48064	7.442e-06	-5.09573	3.474e-07	CRHR1:RP11-105N13.4	0:0	ncRNA_intronic	0.297	6	7	14	1	1	0
17	17	44210933	rs7207582	43806451	rs4617909	0.96339	rs7207582	T	C	0.00613619	4.48064	7.442e-06	-5.10222	3.357e-07	CRHR1:RP11-105N13.4	0:0	ncRNA_intronic	3.132	6	7	14	1	1	0
17	17	44210933	rs7207582	43806925	rs2902662	0.96339	rs7207582	A	G	0.00595731	4.48882	7.162e-06	-5.09297	3.525e-07	CRHR1:RP11-105N13.4	0:0	ncRNA_intronic	10.85		7	14	1	1	0
17	17	44210933	rs7207582	43807063	rs2864087	0.96339	rs7207582	T	C	0.00613619	4.48064	7.442e-06	-5.09715	3.448e-07	CRHR1:RP11-105N13.4	0:0	ncRNA_intronic	5.451		7	14	1	1	0
17	17	44210933	rs7207582	43807099	rs2902661	0.96339	rs7207582	A	G	0.00613619	4.48064	7.442e-06	-4.96651	6.817e-07	CRHR1:RP11-105N13.4	0:0	ncRNA_intronic	8.414		7	14	1	1	0
17	17	44210933	rs7207582	43807113	rs4609899	0.96339	rs7207582	T	C	0.00613619	4.48064	7.442e-06	-4.95998	7.05e-07	CRHR1:RP11-105N13.4	0:0	ncRNA_intronic	2.361	3a	7	14	1	1	0
17	17	44210933	rs7207582	43807134	rs4471726	0.96339	rs7207582	C	T	0.00613557	4.48067	7.441e-06	-5.09677	3.455e-07	CRHR1:RP11-105N13.4	0:0	ncRNA_intronic	4.354	1f	7	14	1	1	0
17	17	44210933	rs7207582	43807485	rs79226879	0.96339	rs7207582	C	T	0.00613557	4.48067	7.441e-06	-4.96805	6.763e-07	CRHR1:RP11-105N13.4	0:0	ncRNA_intronic	9.122	7	7	14	1	1	0
17	17	44210933	rs7207582	43807955	rs17563599	0.96339	rs7207582	C	A	0.00613557	4.48067	7.441e-06	-5.14656	2.653e-07	CRHR1:RP11-105N13.4	0:0	ncRNA_intronic	2.221	6	9	9	1	1	0
17	17	44210933	rs7207582	43808067	rs17649138	0.96339	rs7207582	A	G	0.00613619	4.48064	7.442e-06	-5.13423	2.833e-07	CRHR1:RP11-105N13.4	0:0	ncRNA_intronic	10.02	6	9	9	1	1	0
17	17	44210933	rs7207582	43808321	rs62054389	0.96339	rs7207582	A	G	0.00613619	4.48064	7.442e-06	-4.98692	6.135e-07	CRHR1:RP11-105N13.4	0:0	ncRNA_intronic	2.108	7	9	9	1	1	0
17	17	44210933	rs7207582	43808443	rs62054390	0.9529	rs7207582	C	A	0.00598199	4.48769	7.2e-06	-4.99029	6.029e-07	CRHR1:RP11-105N13.4	0:0	ncRNA_intronic	1.373	7	9	9	1	1	0
17	17	44210933	rs7207582	43808763	rs55947210	0.96339	rs7207582	G	A	0.00613557	4.48067	7.441e-06	-5.01371	5.339e-07	CRHR1:RP11-105N13.4	0:0	ncRNA_intronic	11.04	5	9	9	1	1	0
17	17	44210933	rs7207582	43808945	rs62054392	0.96339	rs7207582	T	C	0.00613619	4.48064	7.442e-06	-4.98894	6.071e-07	CRHR1:RP11-105N13.4	0:0	ncRNA_intronic	3.069	5	8	9	1	1	0
17	17	44210933	rs7207582	43809016	rs4390635	0.96339	rs7207582	T	C	0.00613619	4.48064	7.442e-06	-5.14445	2.683e-07	CRHR1:RP11-105N13.4	0:0	ncRNA_intronic	5.436	1f	8	9	1	1	0
17	17	44210933	rs7207582	43809264	rs62054393	0.96339	rs7207582	G	T	0.00613557	4.48067	7.441e-06	-5.01389	5.334e-07	CRHR1:RP11-105N13.4:RP11-293E1.2	0:0:0	ncRNA_exonic	4.751	5	8	9	1	1	0
17	17	44210933	rs7207582	43809328	rs75986348	0.96339	rs7207582	G	A	0.00613557	4.48067	7.441e-06	-4.99833	5.783e-07	CRHR1:RP11-105N13.4:RP11-293E1.2	0:0:0	ncRNA_intronic	11.08	5	8	9	1	1	0
17	17	44210933	rs7207582	43810896	rs77804065	0.90709	rs7207582	T	C	0.0185166	4.16133	3.164e-05	-5.3532	8.641e-08	CRHR1:RP11-105N13.4:RP11-293E1.1	0:0:0	ncRNA_intronic	13.58		5	14	1	1	0
17	17	44210933	rs7207582	43810902	rs77301847	0.96339	rs7207582	G	A	0.00613557	4.48067	7.441e-06	-4.96452	6.887e-07	CRHR1:RP11-105N13.4:RP11-293E1.1	0:0:0	ncRNA_intronic	13.52		5	14	1	1	0
17	17	44210933	rs7207582	43811060	rs62054395	0.96339	rs7207582	G	T	0.00613557	4.48067	7.441e-06	-5.00432	5.606e-07	CRHR1:RP11-105N13.4:RP11-293E1.1	0:0:0	ncRNA_intronic	1.937	6	5	14	1	1	0
17	17	44210933	rs7207582	43811072	rs17563683	0.96339	rs7207582	G	A	0.00613557	4.48067	7.441e-06	-5.12617	2.957e-07	CRHR1:RP11-105N13.4:RP11-293E1.1	0:0:0	ncRNA_intronic	5.696	6	5	14	1	1	0
17	17	44210933	rs7207582	43811510	rs62054396	0.96339	rs7207582	C	T	0.00613557	4.48067	7.441e-06	-4.94857	7.476e-07	CRHR1:RP11-105N13.4:RP11-293E1.1	0:0:0	ncRNA_intronic	7.054	7	5	14	1	1	0
17	17	44210933	rs7207582	43811673	rs17563718	0.96339	rs7207582	T	C	0.00613619	4.48064	7.442e-06	-5.12471	2.98e-07	CRHR1:RP11-105N13.4:RP11-293E1.1	0:0:0	ncRNA_exonic	4.554	6	5	14	1	1	0
17	17	44210933	rs7207582	43811792	rs62054397	0.96339	rs7207582	T	C	0.00613619	4.48064	7.442e-06	-5.00778	5.506e-07	CRHR1:RP11-105N13.4:RP11-293E1.1	0:0:0	ncRNA_exonic	10.38	5	5	14	1	1	0
17	17	44210933	rs7207582	43811950	rs4569335	0.96339	rs7207582	C	A	0.00613557	4.48067	7.441e-06	-5.00003	5.732e-07	CRHR1:RP11-105N13.4:RP11-293E1.1	0:0:0	ncRNA_exonic	8.825	5	5	14	1	1	0
17	17	44210933	rs7207582	43812177	rs1526125	0.96339	rs7207582	T	C	0.00613619	4.48064	7.442e-06	-5.11959	3.062e-07	CRHR1:RP11-105N13.4	0:0	ncRNA_intronic	2.724	1b	5	14	1	1	0
17	17	44210933	rs7207582	43812218	rs1526126	0.96339	rs7207582	T	C	0.00613619	4.48064	7.442e-06	-5.17501	2.279e-07	CRHR1:RP11-105N13.4	0:0	ncRNA_intronic	8.475	1b	5	14	1	1	0
17	17	44210933	rs7207582	43812599	rs62054398	0.96339	rs7207582	G	A	0.00613557	4.48067	7.441e-06	-4.99823	5.786e-07	CRHR1:RP11-105N13.4	0:0	ncRNA_intronic	3.759	7	5	14	1	1	0
17	17	44210933	rs7207582	43812624	rs62054399	0.96339	rs7207582	A	G	0.00613619	4.48064	7.442e-06	-5.00912	5.468e-07	CRHR1:RP11-105N13.4	0:0	ncRNA_intronic	3.445	6	5	14	1	1	0
17	17	44210933	rs7207582	43812649	rs62054400	0.96339	rs7207582	C	T	0.00613557	4.48067	7.441e-06	-5.00528	5.578e-07	CRHR1:RP11-105N13.4	0:0	ncRNA_intronic	6.037	6	5	14	1	1	0
17	17	44210933	rs7207582	43812684	rs62054411	0.96339	rs7207582	G	A	0.00613557	4.48067	7.441e-06	-5.00521	5.58e-07	CRHR1:RP11-105N13.4	0:0	ncRNA_intronic	5.854	7	5	14	1	1	0
17	17	44210933	rs7207582	43813002	rs62054412	0.96339	rs7207582	A	G	0.00613619	4.48064	7.442e-06	-4.97633	6.48e-07	CRHR1:RP11-105N13.4	0:0	ncRNA_intronic	1.747	5	5	14	1	1	0
17	17	44210933	rs7207582	43813415	rs62054414	0.96339	rs7207582	A	G	0.00613619	4.48064	7.442e-06	-4.99577	5.86e-07	CRHR1:RP11-105N13.4	0:0	ncRNA_intronic	6.73	5	5	14	1	1	0
17	17	44210933	rs7207582	43814020	rs10451283	0.958005	rs7207582	C	T	0.00466145	4.55144	5.328e-06	-5.08275	3.72e-07	CRHR1:RP11-105N13.4	0:0	ncRNA_intronic	0.851	5	5	14	1	1	0
17	17	44210933	rs7207582	43814427	rs76421814	0.96339	rs7207582	C	T	0.00613557	4.48067	7.441e-06	-5.00667	5.538e-07	CRHR1:RP11-105N13.4	0:0	ncRNA_intronic	8.405	7	5	14	1	1	0
17	17	44210933	rs7207582	43815141	rs56006248	0.96339	rs7207582	G	A	0.00613557	4.48067	7.441e-06	-5.01683	5.253e-07	CRHR1:RP11-105N13.4	0:0	ncRNA_intronic	0.59	7	5	14	1	1	0
17	17	44210933	rs7207582	43815336	rs56298110	0.96339	rs7207582	G	A	0.00613557	4.48067	7.441e-06	-4.97928	6.382e-07	CRHR1:RP11-105N13.4	0:0	ncRNA_intronic	4.042	6	5	14	1	1	0
17	17	44210933	rs7207582	43815713	rs1608955	0.96339	rs7207582	T	C	0.00613619	4.48064	7.442e-06	-4.90808	9.197e-07	CRHR1:RP11-105N13.4	0:0	ncRNA_intronic	1.827	7	5	14	1	1	0
17	17	44210933	rs7207582	43815859	rs62054417	0.96339	rs7207582	C	A	0.00613557	4.48067	7.441e-06	-5.01632	5.267e-07	CRHR1:RP11-105N13.4	0:0	ncRNA_intronic	2.558	6	5	14	1	1	0
17	17	44210933	rs7207582	43816052	rs78440279	0.958005	rs7207582	T	C	0.00694006	4.44918	8.62e-06	-4.99749	5.808e-07	CRHR1:RP11-105N13.4	0:0	ncRNA_intronic	0.226	7	5	14	1	1	0
17	17	44210933	rs7207582	43816106	rs75500942	0.96339	rs7207582	A	C	0.00613619	4.48064	7.442e-06	-5.02004	5.166e-07	CRHR1:RP11-105N13.4	0:0	ncRNA_intronic	1.154	7	5	14	1	1	0
17	17	44210933	rs7207582	43816306	rs62054418	0.96339	rs7207582	A	G	0.00613619	4.48064	7.442e-06	-5.01893	5.196e-07	CRHR1:RP11-105N13.4	0:0	ncRNA_intronic	2.506	7	5	14	1	1	0
17	17	44210933	rs7207582	43816605	rs62054419	0.96339	rs7207582	C	A	0.00613557	4.48067	7.441e-06	-5.00618	5.552e-07	CRHR1:RP11-105N13.4	0:0	ncRNA_intronic	2.655	6	5	14	1	1	0
17	17	44210933	rs7207582	43816657	rs62054421	0.958005	rs7207582	A	G	0.00563791	4.50338	6.688e-06	-5.01897	5.195e-07	CRHR1:RP11-105N13.4	0:0	ncRNA_intronic	1.15	7	5	14	1	1	0
17	17	44210933	rs7207582	43817459	rs17563800	0.96339	rs7207582	T	C	0.00620772	4.47736	7.557e-06	-5.14237	2.713e-07	CRHR1:RP11-105N13.4	0:0	ncRNA_intronic	8.442	1b	5	14	1	1	0
17	17	44210933	rs7207582	43817557	rs56295996	0.96339	rs7207582	T	C	0.00610033	4.48228	7.385e-06	-4.96248	6.96e-07	CRHR1:RP11-105N13.4	0:0	ncRNA_intronic	0.384	3a	5	14	1	1	0
17	17	44210933	rs7207582	43817608	rs56384960	0.96339	rs7207582	A	G	0.00610033	4.48228	7.385e-06	-5.00377	5.622e-07	CRHR1:RP11-105N13.4	0:0	ncRNA_intronic	4.422	4	2	14	1	1	0
17	17	44210933	rs7207582	43817832	rs56178230	0.96339	rs7207582	A	G	0.00606482	4.4839	7.329e-06	-5.00387	5.619e-07	CRHR1:RP11-105N13.4	0:0	ncRNA_intronic	2.377	4	5	14	1	1	0
17	17	44210933	rs7207582	43817898	rs80157557	0.96339	rs7207582	A	G	0.00602904	4.48554	7.273e-06	-5.00387	5.619e-07	CRHR1:RP11-105N13.4	0:0	ncRNA_intronic	0.684	4	5	14	1	1	0
17	17	44210933	rs7207582	43818160	rs76728632	0.96339	rs7207582	C	A	0.0059917	4.48725	7.215e-06	-4.95743	7.143e-07	CRHR1:RP11-105N13.4	0:0	ncRNA_intronic	2.219	2a	1	14	1	1	0
17	17	44210933	rs7207582	43818222	rs17563827	0.96339	rs7207582	A	C	0.00595731	4.48882	7.162e-06	-5.1077	3.261e-07	CRHR1:RP11-105N13.4	0:0	ncRNA_intronic	3.106	1f	1	14	1	1	0
17	17	44210933	rs7207582	43818611	rs80072429	0.96339	rs7207582	A	G	0.00599299	4.48719	7.217e-06	-4.98761	6.113e-07	CRHR1:RP11-105N13.4	0:0	ncRNA_intronic	3.91	5	1	14	1	1	0
17	17	44210933	rs7207582	43818657	rs77114624	0.96339	rs7207582	C	T	0.0059917	4.48725	7.215e-06	-4.9872	6.126e-07	CRHR1:RP11-105N13.4	0:0	ncRNA_intronic	4.776	5	1	14	1	1	0
17	17	44210933	rs7207582	43818690	rs76311426	0.96339	rs7207582	T	G	0.00599299	4.48719	7.217e-06	-4.9872	6.126e-07	CRHR1:RP11-105N13.4	0:0	ncRNA_intronic	0.857	5	1	14	1	1	0
17	17	44210933	rs7207582	43818906	rs17563861	0.96339	rs7207582	G	A	0.00593315	4.48992	7.125e-06	-5.09964	3.403e-07	CRHR1:RP11-105N13.4	0:0	ncRNA_intronic	3.007	6	5	14	1	1	0
17	17	44210933	rs7207582	43819384	rs62054424	0.96339	rs7207582	A	G	0.00595731	4.48882	7.162e-06	-4.96682	6.806e-07	CRHR1:RP11-105N13.4	0:0	ncRNA_intronic	2.333	5	5	14	1	1	0
17	17	44210933	rs7207582	43819450	rs17563923	0.96339	rs7207582	A	G	0.00595731	4.48882	7.162e-06	-5.11015	3.219e-07	CRHR1:RP11-105N13.4	0:0	ncRNA_intronic	0.024	1f	5	14	1	1	0
17	17	44210933	rs7207582	43819480	rs62054425	0.96339	rs7207582	T	C	0.00595731	4.48882	7.162e-06	-4.9744	6.545e-07	CRHR1:RP11-105N13.4	0:0	ncRNA_intronic	7.48	5	5	14	1	1	0
17	17	44210933	rs7207582	43821062	rs62054427	0.96339	rs7207582	G	A	0.005941	4.48956	7.137e-06	-4.93184	8.146e-07	CRHR1:RP11-105N13.4	0:0	ncRNA_intronic	4.874	5	5	14	1	1	0
17	17	44210933	rs7207582	43821685	rs74464991	0.96339	rs7207582	A	C	0.00594426	4.48941	7.142e-06	-4.91893	8.702e-07	CRHR1:RP11-105N13.4	0:0	ncRNA_intronic	5.258	6	5	14	1	1	0
17	17	44210933	rs7207582	43822398	rs2004260	0.96339	rs7207582	C	T	0.005941	4.48956	7.137e-06	-4.98557	6.178e-07	CRHR1:RP11-105N13.4	0:0	ncRNA_intronic	5.045		5	14	1	1	0
17	17	44210933	rs7207582	43822511	rs62054428	0.96339	rs7207582	A	G	0.00594426	4.48941	7.142e-06	-4.96693	6.802e-07	CRHR1:RP11-105N13.4	0:0	ncRNA_intronic	6.76	7	5	14	1	1	0
17	17	44210933	rs7207582	43823125	rs62054429	0.96339	rs7207582	A	G	0.00584992	4.49372	6.999e-06	-4.87071	1.112e-06	CRHR1:RP11-105N13.4	0:0	ncRNA_intronic	3.95	5	5	14	1	1	0
17	17	44210933	rs7207582	43823229	rs76171147	0.96339	rs7207582	C	T	0.00585192	4.49363	7.002e-06	-4.96009	7.046e-07	CRHR1:RP11-105N13.4	0:0	ncRNA_intronic	9.232	4	5	14	1	1	0
17	17	44210933	rs7207582	43823326	rs75643244	0.96339	rs7207582	G	A	0.00603993	4.48504	7.29e-06	-4.92101	8.61e-07	CRHR1:RP11-105N13.4	0:0	ncRNA_intronic	7.466	4	5	14	1	1	0
17	17	44210933	rs7207582	43823880	rs62054431	0.96339	rs7207582	T	C	0.00584992	4.49372	6.999e-06	-4.91803	8.742e-07	CRHR1:RP11-105N13.4	0:0	ncRNA_intronic	3.521	5	5	14	1	1	0
17	17	44210933	rs7207582	43823889	rs62054432	0.96339	rs7207582	A	C	0.00584992	4.49372	6.999e-06	-4.95217	7.339e-07	CRHR1:RP11-105N13.4	0:0	ncRNA_intronic	0.701	5	5	14	1	1	0
17	17	44210933	rs7207582	43824201	rs111497072	0.96339	rs7207582	A	G	0.00584992	4.49372	6.999e-06	-4.9527	7.319e-07	CRHR1:RP11-105N13.4	0:0	ncRNA_intronic	0.015	6	5	14	1	1	0
17	17	44210933	rs7207582	43824348	rs62054433	0.96339	rs7207582	C	T	0.00621943	4.47691	7.573e-06	-4.92943	8.247e-07	CRHR1:RP11-105N13.4	0:0	ncRNA_intronic	0.323	7	5	14	1	1	0
17	17	44210933	rs7207582	43824382	rs62054434	0.96339	rs7207582	G	T	0.00621943	4.47691	7.573e-06	-4.92368	8.493e-07	CRHR1:RP11-105N13.4	0:0	ncRNA_intronic	3.385	6	5	14	1	1	0
17	17	44210933	rs7207582	43824848	rs12150683	0.96339	rs7207582	G	A	0.00585192	4.49363	7.002e-06	-5.08725	3.633e-07	CRHR1:RP11-105N13.4	0:0	ncRNA_intronic	12.82	6	5	14	1	1	0
17	17	44210933	rs7207582	43824908	rs12150332	0.96339	rs7207582	T	C	0.00584992	4.49372	6.999e-06	-4.9458	7.583e-07	CRHR1:RP11-105N13.4	0:0	ncRNA_intronic	1.626	7	5	14	1	1	0
17	17	44210933	rs7207582	43825478	rs75715199	0.96339	rs7207582	A	G	0.00584992	4.49372	6.999e-06	-4.95069	7.395e-07	CRHR1:RP11-105N13.4	0:0	ncRNA_intronic	14.38	5	5	14	1	1	0
17	17	44210933	rs7207582	43825568	rs62054436	0.96339	rs7207582	T	C	0.00584992	4.49372	6.999e-06	-4.78938	1.673e-06	CRHR1:RP11-105N13.4	0:0	ncRNA_intronic	0.233	5	5	14	1	1	0
17	17	44210933	rs7207582	43825576	rs62054437	0.958195	rs7207582	C	T	0.00692001	4.44995	8.589e-06	-4.81217	1.493e-06	CRHR1:RP11-105N13.4	0:0	ncRNA_intronic	1.001	5	5	14	1	1	0
17	17	44210933	rs7207582	43825711	rs62054438	0.96339	rs7207582	C	A	0.00585192	4.49363	7.002e-06	-4.94076	7.782e-07	CRHR1:RP11-105N13.4	0:0	ncRNA_intronic	1.229	5	5	14	1	1	0
17	17	44210933	rs7207582	43825725	rs62054439	0.96339	rs7207582	T	G	0.00584992	4.49372	6.999e-06	-4.95122	7.375e-07	CRHR1:RP11-105N13.4	0:0	ncRNA_intronic	3.246	5	5	14	1	1	0
17	17	44210933	rs7207582	43825912	rs17334797	0.96339	rs7207582	G	A	0.00572634	4.49935	6.816e-06	-5.06882	4.003e-07	CRHR1:RP11-105N13.4	0:0	ncRNA_intronic	1.619	1f	5	14	1	1	0
17	17	44210933	rs7207582	43826305	rs12150658	0.96339	rs7207582	A	G	0.00588577	4.49208	7.053e-06	-5.06806	4.019e-07	CRHR1:RP11-105N13.4	0:0	ncRNA_intronic	4.801	1f	5	14	1	1	0
17	17	44210933	rs7207582	43826351	rs12150363	0.96339	rs7207582	G	A	0.00588643	4.49205	7.054e-06	-4.9531	7.304e-07	CRHR1:RP11-105N13.4	0:0	ncRNA_intronic	3.55	2c	5	14	1	1	0
17	17	44210933	rs7207582	43826637	rs12150672	0.96339	rs7207582	A	G	0.00588577	4.49208	7.053e-06	-5.06575	4.068e-07	CRHR1:RP11-105N13.4	0:0	ncRNA_intronic	0.321	1d	5	14	1	1	0
17	17	44210933	rs7207582	43827209	rs17334894	0.96339	rs7207582	A	G	0.00544496	4.51216	6.417e-06	-5.02797	4.957e-07	CRHR1:RP11-105N13.4	0:0	ncRNA_intronic	1.03	1f	5	14	1	1	0
17	17	44210933	rs7207582	43827244	rs17334923	0.96339	rs7207582	T	C	0.00651284	4.46564	7.983e-06	-4.91118	9.053e-07	CRHR1:RP11-105N13.4	0:0	ncRNA_intronic	10.74	5	5	14	1	1	0
17	17	44210933	rs7207582	43827431	rs12150451	0.96339	rs7207582	G	A	0.00592135	4.49046	7.107e-06	-5.0453	4.528e-07	CRHR1:RP11-105N13.4	0:0	ncRNA_intronic	0.482	1f	5	14	1	1	0
17	17	44210933	rs7207582	43827508	rs12150455	0.96339	rs7207582	G	A	0.00592135	4.49046	7.107e-06	-5.06112	4.168e-07	CRHR1:RP11-105N13.4	0:0	ncRNA_intronic	3.287	1f	5	14	1	1	0
17	17	44210933	rs7207582	43828617	rs17334944	0.958195	rs7207582	A	G	0.00750206	4.42744	9.536e-06	-5.01138	5.404e-07	CRHR1:RP11-105N13.4	0:0	ncRNA_intronic	0.13	1f	5	14	1	1	0
17	17	44210933	rs7207582	43828698	rs17426064	0.96339	rs7207582	T	C	0.00574137	4.49867	6.838e-06	-5.05013	4.415e-07	CRHR1:RP11-105N13.4	0:0	ncRNA_intronic	0.415	6	5	14	1	1	0
17	17	44210933	rs7207582	43828764	rs79172804	0.838267	rs7207582	A	G	0.0160297	4.2076	2.581e-05	-4.51894	6.215e-06	CRHR1:RP11-105N13.4	0:0	ncRNA_intronic	0.039	5	5	14	1	1	0
17	17	44210933	rs7207582	43829353	rs62054442	0.958005	rs7207582	G	A	0.00561553	4.5044	6.656e-06	-4.9321	8.135e-07	CRHR1:RP11-105N13.4	0:0	ncRNA_intronic	0.072	5	5	14	1	1	0
17	17	44210933	rs7207582	43830382	rs35879086	0.96339	rs7207582	A	G	0.00601556	4.48615	7.252e-06	-4.88486	1.035e-06	CRHR1:RP11-105N13.4	0:0	ncRNA_intronic	2.132	7	5	14	1	1	0
17	17	44210933	rs7207582	43830640	rs62055868	0.96339	rs7207582	T	C	0.00558883	4.50562	6.618e-06	-4.89726	9.718e-07	CRHR1:RP11-105N13.4	0:0	ncRNA_intronic	0.716	5	5	14	1	1	0
17	17	44210933	rs7207582	43830685	rs62055869	0.96339	rs7207582	A	G	0.00605144	4.48451	7.308e-06	-4.85531	1.202e-06	CRHR1:RP11-105N13.4	0:0	ncRNA_intronic	2.147	5	5	14	1	1	0
17	17	44210933	rs7207582	43831112	rs62055871	0.96339	rs7207582	A	G	0.00618111	4.47858	7.514e-06	-4.85813	1.185e-06	CRHR1:RP11-105N13.4	0:0	ncRNA_intronic	0.89	2b	5	14	1	1	0
17	17	44210933	rs7207582	43832115	rs55645418	0.96339	rs7207582	G	A	0.00601041	4.48639	7.244e-06	-4.88716	1.023e-06	CRHR1:RP11-105N13.4	0:0	ncRNA_intronic	0.673	7	5	14	1	1	0
17	17	44210933	rs7207582	43832337	rs35631660	0.96339	rs7207582	G	A	0.00611924	4.48141	7.415e-06	-4.93165	8.154e-07	CRHR1:RP11-105N13.4	0:0	ncRNA_intronic	1.303	7	5	14	1	1	0
17	17	44210933	rs7207582	43832367	rs17426195	0.96339	rs7207582	A	G	0.00509801	4.52791	5.957e-06	-5.08174	3.74e-07	CRHR1:RP11-105N13.4	0:0	ncRNA_intronic	0.732	6	5	14	1	1	0
17	17	44210933	rs7207582	43832618	rs35282504	0.96339	rs7207582	A	G	0.00621869	4.47694	7.572e-06	-4.88582	1.03e-06	CRHR1:RP11-105N13.4	0:0	ncRNA_intronic	3.509	5	5	14	1	1	0
17	17	44210933	rs7207582	43832864	rs62055875	0.96339	rs7207582	C	T	0.00622016	4.47689	7.574e-06	-4.88639	1.027e-06	CRHR1:RP11-105N13.4	0:0	ncRNA_intronic	6.448	5	5	14	1	1	0
17	17	44210933	rs7207582	43832940	rs62055876	0.958005	rs7207582	G	A	0.00595665	4.48885	7.161e-06	-4.94166	7.746e-07	CRHR1:RP11-105N13.4	0:0	ncRNA_intronic	2.028	7	5	14	1	1	0
17	17	44210933	rs7207582	43833921	rs34195569	0.96339	rs7207582	A	G	0.00626116	4.47531	7.63e-06	-4.8535	1.213e-06	CRHR1:RP11-105N13.4	0:0	ncRNA_intronic	2.337	5	5	14	1	1	0
17	17	44210933	rs7207582	43833981	rs34579278	0.96339	rs7207582	G	A	0.00622016	4.47689	7.574e-06	-4.90862	9.172e-07	CRHR1:RP11-105N13.4	0:0	ncRNA_intronic	3.424	5	5	14	1	1	0
17	17	44210933	rs7207582	43834314	rs34008514	0.96339	rs7207582	G	A	0.00626189	4.47528	7.631e-06	-4.92526	8.425e-07	CRHR1:RP11-105N13.4	0:0	ncRNA_intronic	2.158	5	5	14	1	1	0
17	17	44210933	rs7207582	43834482	rs12943085	0.96339	rs7207582	A	G	0.00626116	4.47531	7.63e-06	-4.97004	6.694e-07	CRHR1:RP11-105N13.4	0:0	ncRNA_intronic	11.98	5	5	14	1	1	0
17	17	44210933	rs7207582	43834970	rs7350923	0.96339	rs7207582	T	C	0.00626116	4.47531	7.63e-06	-4.97372	6.568e-07	CRHR1:RP11-105N13.4	0:0	ncRNA_intronic	0.394	5	5	14	1	1	0
17	17	44210933	rs7207582	43835351	rs11079717	0.96339	rs7207582	C	T	0.00622016	4.47689	7.574e-06	-4.97446	6.543e-07	CRHR1:RP11-105N13.4	0:0	ncRNA_intronic	4.034	1f	5	14	1	1	0
17	17	44210933	rs7207582	43835854	rs62055878	0.96339	rs7207582	A	C	0.00653301	4.46486	8.012e-06	-4.93921	7.844e-07	CRHR1:RP11-105N13.4	0:0	ncRNA_intronic	14.24	5	5	14	1	1	0
17	17	44210933	rs7207582	43836191	rs74514268	0.96339	rs7207582	A	G	0.00665665	4.4601	8.192e-06	-4.93352	8.076e-07	CRHR1:RP11-105N13.4	0:0	ncRNA_intronic	0.633	7	5	14	1	1	0
17	17	44210933	rs7207582	43836673	rs12948216	0.96339	rs7207582	T	C	0.00678425	4.45519	8.382e-06	-5.00698	5.529e-07	CRHR1:RP11-105N13.4	0:0	ncRNA_intronic	0.014	6	5	14	1	1	0
17	17	44210933	rs7207582	43836920	rs56013908	0.96339	rs7207582	C	T	0.0067869	4.45508	8.386e-06	-4.95204	7.344e-07	CRHR1:RP11-105N13.4	0:0	ncRNA_intronic	3.339	5	5	14	1	1	0
17	17	44210933	rs7207582	43836953	rs56214516	0.741535	rs7207582	C	A	0.0363176	3.91845	8.912e-05	-5.10724	3.269e-07	CRHR1:RP11-105N13.4	0:0	ncRNA_intronic	1.735	5	5	14	1	1	0
17	17	44210933	rs7207582	43837091	rs56168907	0.96339	rs7207582	C	T	0.00682855	4.45348	8.449e-06	-4.91231	9.001e-07	CRHR1:RP11-105N13.4	0:0	ncRNA_intronic	3.592	2b	5	14	1	1	0
17	17	44210933	rs7207582	43837115	rs55747440	0.96339	rs7207582	G	A	0.00682855	4.45348	8.449e-06	-4.87997	1.061e-06	CRHR1:RP11-105N13.4	0:0	ncRNA_intronic	9.098	4	5	14	1	1	0
17	17	44210933	rs7207582	43837237	rs55801356	0.96339	rs7207582	G	A	0.00682855	4.45348	8.449e-06	-4.95836	7.109e-07	CRHR1:RP11-105N13.4	0:0	ncRNA_intronic	7.008	3a	2	14	1	1	0
17	17	44210933	rs7207582	43837567	rs62055884	0.96339	rs7207582	T	C	0.00655312	4.46409	8.041e-06	-4.91611	8.828e-07	CRHR1:RP11-105N13.4	0:0	ncRNA_intronic	11.56	5	5	14	1	1	0
17	17	44210933	rs7207582	43837782	rs79882507	0.96339	rs7207582	G	A	0.00682855	4.45348	8.449e-06	-4.94907	7.457e-07	CRHR1:RP11-105N13.4	0:0	ncRNA_intronic	4.296	5	5	14	1	1	0
17	17	44210933	rs7207582	43838014	rs62055885	0.96339	rs7207582	G	A	0.00687447	4.45171	8.519e-06	-4.94424	7.644e-07	CRHR1:RP11-105N13.4	0:0	ncRNA_intronic	4.008	6	5	14	1	1	0
17	17	44210933	rs7207582	43838071	rs28439278	0.96339	rs7207582	T	C	0.00686924	4.45191	8.511e-06	-4.91693	8.791e-07	CRHR1:RP11-105N13.4	0:0	ncRNA_intronic	0.25	6	5	14	1	1	0
17	17	44210933	rs7207582	43838482	rs12150621	0.96339	rs7207582	T	G	0.00676763	4.45583	8.357e-06	-4.83313	1.344e-06	CRHR1:RP11-105N13.4	0:0	ncRNA_intronic	1.795	6	5	14	1	1	0
17	17	44210933	rs7207582	43838678	rs62055886	0.96339	rs7207582	A	G	0.00681008	4.45419	8.421e-06	-4.83093	1.359e-06	CRHR1:RP11-105N13.4	0:0	ncRNA_intronic	0.27	7	5	14	1	1	0
17	17	44210933	rs7207582	43838710	rs62055887	0.96339	rs7207582	C	T	0.00676896	4.45578	8.359e-06	-4.88184	1.051e-06	CRHR1:RP11-105N13.4	0:0	ncRNA_intronic	3.077	7	5	14	1	1	0
17	17	44210933	rs7207582	43838720	rs62055888	0.947806	rs7207582	T	C	0.00815335	4.40579	1.054e-05	-4.85481	1.205e-06	CRHR1:RP11-105N13.4	0:0	ncRNA_intronic	3.328	7	5	14	1	1	0
17	17	44210933	rs7207582	43838919	rs62055889	0.96339	rs7207582	A	G	0.00681008	4.45419	8.421e-06	-4.91192	9.019e-07	CRHR1:RP11-105N13.4	0:0	ncRNA_intronic	0.625	6	5	14	1	1	0
17	17	44210933	rs7207582	43839253	rs71375313	0.96339	rs7207582	A	G	0.00685287	4.45254	8.486e-06	-4.97517	6.519e-07	CRHR1:RP11-105N13.4	0:0	ncRNA_intronic	0.424	5	5	14	1	1	0
17	17	44210933	rs7207582	43840006	rs11079719	0.94207	rs7207582	G	T	0.0146978	4.23525	2.283e-05	-5.12414	2.989e-07	CRHR1:RP11-105N13.4	0:0	ncRNA_intronic	9.06	1f	5	14	1	1	0
17	17	44210933	rs7207582	43840016	rs11079720	0.95829	rs7207582	A	G	0.00915814	4.37273	1.227e-05	-5.05248	4.361e-07	CRHR1:RP11-105N13.4	0:0	ncRNA_intronic	6.475	1f	5	14	1	1	0
17	17	44210933	rs7207582	43840107	rs11079721	0.96339	rs7207582	A	C	0.00724407	4.43743	9.104e-06	-5.04241	4.597e-07	CRHR1:RP11-105N13.4	0:0	ncRNA_intronic	5.565	1f	5	14	1	1	0
17	17	44210933	rs7207582	43840681	rs62055890	0.96339	rs7207582	T	C	0.00728608	4.4358	9.173e-06	-5.00912	5.468e-07	CRHR1:RP11-105N13.4	0:0	ncRNA_intronic	1.147	4	5	14	1	1	0
17	17	44210933	rs7207582	43840864	rs77849344	0.96339	rs7207582	A	G	0.00732779	4.43419	9.242e-06	-4.97334	6.581e-07	CRHR1:RP11-105N13.4	0:0	ncRNA_intronic	5.393	5	5	14	1	1	0
17	17	44210933	rs7207582	43840935	rs79545140	0.96339	rs7207582	C	T	0.00732237	4.4344	9.233e-06	-4.9724	6.613e-07	CRHR1:RP11-105N13.4	0:0	ncRNA_intronic	4.773	5	5	14	1	1	0
17	17	44210933	rs7207582	43841729	rs11079723	0.958005	rs7207582	C	T	0.00625386	4.47559	7.62e-06	-5.00936	5.461e-07	CRHR1:RP11-105N13.4	0:0	ncRNA_intronic	2.296	1f	5	14	1	1	0
17	17	44210933	rs7207582	43841912	rs11079724	0.96339	rs7207582	T	C	0.00710543	4.44279	8.88e-06	-5.12138	3.033e-07	CRHR1:RP11-105N13.4	0:0	ncRNA_intronic	4.166	1f	5	14	1	1	0
17	17	44210933	rs7207582	43842462	rs55707339	0.958195	rs7207582	C	T	0.00725811	4.43689	9.127e-06	-4.97257	6.607e-07	CRHR1:RP11-105N13.4	0:0	ncRNA_intronic	5.777	6	5	14	1	1	0
17	17	44210933	rs7207582	43842494	rs62055893	0.96339	rs7207582	G	A	0.00734042	4.4337	9.263e-06	-4.96949	6.713e-07	CRHR1:RP11-105N13.4	0:0	ncRNA_intronic	2.131	6	5	14	1	1	0
17	17	44210933	rs7207582	43843395	rs75257002	0.958005	rs7207582	T	C	0.0111874	4.31611	1.588e-05	-4.9455	7.595e-07	CRHR1:RP11-105N13.4	0:0	ncRNA_intronic	2.258	5	5	14	1	1	0
17	17	44210933	rs7207582	43843943	rs62055894	0.96339	rs7207582	A	G	0.00684105	4.453	8.468e-06	-4.97835	6.413e-07	CRHR1:RP11-105N13.4	0:0	ncRNA_intronic	4.708	6	5	14	1	1	0
17	17	44210933	rs7207582	43844044	rs62055895	0.96339	rs7207582	G	A	0.00683842	4.4531	8.464e-06	-4.94699	7.537e-07	CRHR1:RP11-105N13.4	0:0	ncRNA_intronic	0.772	5	5	14	1	1	0
17	17	44210933	rs7207582	43844201	rs62055896	0.96339	rs7207582	T	C	0.00684105	4.453	8.468e-06	-4.94671	7.548e-07	CRHR1:RP11-105N13.4	0:0	ncRNA_intronic	1.073	5	5	14	1	1	0
17	17	44210933	rs7207582	43844559	rs56194509	0.96339	rs7207582	G	T	0.00683842	4.4531	8.464e-06	-4.69113	2.717e-06	CRHR1:RP11-105N13.4	0:0	ncRNA_intronic	12.2	5	5	14	1	1	0
17	17	44210933	rs7207582	43844560	rs55657917	0.96339	rs7207582	G	T	0.00683842	4.4531	8.464e-06	-4.69325	2.689e-06	CRHR1:RP11-105N13.4	0:0	ncRNA_intronic	14.78	5	5	14	1	1	0
17	17	44210933	rs7207582	43844798	rs56082319	0.958195	rs7207582	A	G	0.00449753	4.5603	5.108e-06	-4.94465	7.628e-07	CRHR1:RP11-105N13.4	0:0	ncRNA_intronic	6.145	6	5	14	1	1	0
17	17	44210933	rs7207582	43844859	rs56109643	0.96339	rs7207582	G	A	0.00683842	4.4531	8.464e-06	-4.94358	7.67e-07	CRHR1:RP11-105N13.4	0:0	ncRNA_intronic	8.963	5	5	14	1	1	0
17	17	44210933	rs7207582	43845041	rs62055901	0.96339	rs7207582	A	G	0.00684105	4.453	8.468e-06	-4.95138	7.369e-07	CRHR1:RP11-105N13.4	0:0	ncRNA_intronic	6.579	7	5	14	1	1	0
17	17	44210933	rs7207582	43846668	rs62055903	0.96339	rs7207582	A	C	0.00688295	4.45138	8.532e-06	-5.03506	4.777e-07	CRHR1:RP11-105N13.4	0:0	ncRNA_intronic	2.391	7	5	14	1	1	0
17	17	44210933	rs7207582	43846820	rs111374028	0.96339	rs7207582	A	G	0.00688295	4.45138	8.532e-06	-4.95806	7.12e-07	CRHR1:RP11-105N13.4	0:0	ncRNA_intronic	3.475	7	5	14	1	1	0
17	17	44210933	rs7207582	43847039	rs113934115	0.96339	rs7207582	T	C	0.00688295	4.45138	8.532e-06	-5.00162	5.685e-07	CRHR1:RP11-105N13.4	0:0	ncRNA_intronic	2.416	7	5	14	1	1	0
17	17	44210933	rs7207582	43847374	rs62055928	0.96339	rs7207582	A	G	0.0069213	4.4499	8.591e-06	-4.96365	6.918e-07	CRHR1:RP11-105N13.4	0:0	ncRNA_intronic	5.934	5	5	14	1	1	0
17	17	44210933	rs7207582	43847741	rs56268325	0.96339	rs7207582	C	T	0.00692519	4.44975	8.597e-06	-4.90098	9.536e-07	CRHR1:RP11-105N13.4	0:0	ncRNA_intronic	3.648	7	5	14	1	1	0
17	17	44210933	rs7207582	43847868	rs56070245	0.96339	rs7207582	C	T	0.00696646	4.44816	8.661e-06	-4.95222	7.337e-07	CRHR1:RP11-105N13.4	0:0	ncRNA_intronic	4.711	6	5	14	1	1	0
17	17	44210933	rs7207582	43847912	rs56387266	0.96339	rs7207582	C	T	0.00696646	4.44816	8.661e-06	-4.95281	7.315e-07	CRHR1:RP11-105N13.4	0:0	ncRNA_intronic	4.389	6	5	14	1	1	0
17	17	44210933	rs7207582	43848181	rs34303488	0.96339	rs7207582	T	C	0.00696389	4.44826	8.657e-06	-4.96776	6.773e-07	CRHR1:RP11-105N13.4	0:0	ncRNA_intronic	5.185	3a	2	14	1	1	0
17	17	44210933	rs7207582	43848412	rs62055932	0.96339	rs7207582	G	A	0.00569613	4.50073	6.772e-06	-4.94839	7.483e-07	CRHR1:RP11-105N13.4	0:0	ncRNA_intronic	6.698	5	2	14	1	1	0
17	17	44210933	rs7207582	43848461	rs62055933	0.96339	rs7207582	A	G	0.00706328	4.44442	8.813e-06	-4.88091	1.056e-06	CRHR1:RP11-105N13.4	0:0	ncRNA_intronic	9.334	5	2	14	1	1	0
17	17	44210933	rs7207582	43848750	rs62055935	0.96339	rs7207582	C	T	0.00696646	4.44816	8.661e-06	-5.05741	4.25e-07	CRHR1:RP11-105N13.4	0:0	ncRNA_intronic	4.092	5	2	14	1	1	0
17	17	44210933	rs7207582	43848968	rs62055937	0.96339	rs7207582	T	G	0.00696389	4.44826	8.657e-06	-4.92005	8.652e-07	CRHR1:RP11-105N13.4	0:0	ncRNA_intronic	0.746	5	2	14	1	1	0
17	17	44210933	rs7207582	43849327	rs76294809	0.96339	rs7207582	A	G	0.00696389	4.44826	8.657e-06	-4.94727	7.526e-07	CRHR1:RP11-105N13.4	0:0	ncRNA_intronic	3.511	5	2	14	1	1	0
17	17	44210933	rs7207582	43849366	rs75916678	0.96339	rs7207582	C	T	0.00696646	4.44816	8.661e-06	-5.02296	5.088e-07	CRHR1:RP11-105N13.4	0:0	ncRNA_intronic	1.711	5	2	14	1	1	0
17	17	44210933	rs7207582	43849415	rs79730878	0.921699	rs7207582	C	T	0.00404558	4.58573	4.524e-06	-4.82643	1.39e-06	CRHR1:RP11-105N13.4	0:0	ncRNA_intronic	2.608	5	5	14	1	1	0
17	17	44210933	rs7207582	43849656	rs62055938	0.96339	rs7207582	A	C	0.0069213	4.4499	8.591e-06	-4.925	8.436e-07	CRHR1:RP11-105N13.4	0:0	ncRNA_intronic	2.093	5	5	14	1	1	0
17	17	44210933	rs7207582	43849896	rs62055940	0.96339	rs7207582	G	A	0.00692519	4.44975	8.597e-06	-4.92844	8.289e-07	CRHR1:RP11-105N13.4	0:0	ncRNA_intronic	4.504	7	5	14	1	1	0
17	17	44210933	rs7207582	43850519	rs76885724	0.96339	rs7207582	T	C	0.00688295	4.45138	8.532e-06	-4.92276	8.533e-07	CRHR1:RP11-105N13.4	0:0	ncRNA_intronic	3.339	5	5	14	1	1	0
17	17	44210933	rs7207582	43850645	rs60814418	0.952718	rs7207582	T	C	0.0085187	4.39377	1.114e-05	-5.07722	3.83e-07	CRHR1:RP11-105N13.4	0:0	ncRNA_intronic	0.32	5	5	14	1	1	0
17	17	44210933	rs7207582	43850966	rs62055942	0.96339	rs7207582	G	A	0.00687969	4.45151	8.527e-06	-4.92334	8.508e-07	CRHR1:RP11-105N13.4	0:0	ncRNA_intronic	0.204	7	5	14	1	1	0
17	17	44210933	rs7207582	43851018	rs62055943	0.96339	rs7207582	C	T	0.00683842	4.4531	8.464e-06	-4.97126	6.652e-07	CRHR1:RP11-105N13.4	0:0	ncRNA_intronic	4.564	6	5	14	1	1	0
17	17	44210933	rs7207582	43851851	rs62055945	0.96339	rs7207582	A	G	0.00684105	4.453	8.468e-06	-4.8477	1.249e-06	CRHR1:RP11-105N13.4	0:0	ncRNA_intronic	4.038	7	5	14	1	1	0
17	17	44210933	rs7207582	43851971	rs62055946	0.96339	rs7207582	A	C	0.00684105	4.453	8.468e-06	-4.92714	8.344e-07	CRHR1:RP11-105N13.4	0:0	ncRNA_intronic	2.041	5	5	14	1	1	0
17	17	44210933	rs7207582	43852605	rs62055947	0.96339	rs7207582	T	C	0.00684105	4.453	8.468e-06	-4.76992	1.843e-06	CRHR1:RP11-105N13.4	0:0	ncRNA_intronic	0.602	5	5	14	1	1	0
17	17	44210933	rs7207582	43852621	rs62055948	0.96339	rs7207582	C	T	0.00683842	4.4531	8.464e-06	-4.76062	1.93e-06	CRHR1:RP11-105N13.4	0:0	ncRNA_intronic	6.012	5	5	14	1	1	0
17	17	44210933	rs7207582	43852733	rs113871181	0.96339	rs7207582	A	G	0.00684105	4.453	8.468e-06	-4.88165	1.052e-06	CRHR1:RP11-105N13.4	0:0	ncRNA_intronic	1.826	5	5	14	1	1	0
17	17	44210933	rs7207582	43852742	rs111370985	0.96339	rs7207582	C	T	0.00683842	4.4531	8.464e-06	-4.8593	1.178e-06	CRHR1:RP11-105N13.4	0:0	ncRNA_intronic	5.079	5	5	14	1	1	0
17	17	44210933	rs7207582	43853109	rs55787105	0.96339	rs7207582	A	G	0.00684105	4.453	8.468e-06	-4.95695	7.161e-07	CRHR1:RP11-105N13.4	0:0	ncRNA_intronic	10.95	4	5	14	1	1	0
17	17	44210933	rs7207582	43853133	rs62055950	0.96339	rs7207582	C	T	0.00683842	4.4531	8.464e-06	-4.92015	8.648e-07	CRHR1:RP11-105N13.4	0:0	ncRNA_intronic	3.573	2a	5	14	1	1	0
17	17	44210933	rs7207582	43853235	rs56043078	0.96339	rs7207582	G	T	0.00683842	4.4531	8.464e-06	-4.93352	8.076e-07	CRHR1:RP11-105N13.4	0:0	ncRNA_intronic	0.872	4	5	14	1	1	0
17	17	44210933	rs7207582	43853457	rs77965652	0.96339	rs7207582	G	A	0.00662805	4.46121	8.15e-06	-4.91807	8.74e-07	CRHR1:RP11-105N13.4	0:0	ncRNA_intronic	8.694	5	5	14	1	1	0
17	17	44210933	rs7207582	43853526	rs55849949	0.96339	rs7207582	G	A	0.00679751	4.45468	8.402e-06	-4.9194	8.681e-07	CRHR1:RP11-105N13.4	0:0	ncRNA_intronic	9.088	5	5	14	1	1	0
17	17	44210933	rs7207582	43854267	rs55991914	0.96339	rs7207582	T	C	0.00684105	4.453	8.468e-06	-4.94056	7.79e-07	CRHR1:RP11-105N13.4	0:0	ncRNA_intronic	1.119	5	5	14	1	1	0
17	17	44210933	rs7207582	43854340	rs62055955	0.958195	rs7207582	G	A	0.00681074	4.45417	8.422e-06	-4.90723	9.237e-07	CRHR1:RP11-105N13.4	0:0	ncRNA_intronic	4.012	5	5	14	1	1	0
17	17	44210933	rs7207582	43854449	rs62055956	0.958195	rs7207582	T	C	0.00679884	4.45462	8.404e-06	-4.90506	9.34e-07	CRHR1:RP11-105N13.4	0:0	ncRNA_intronic	5.008	7	5	14	1	1	0
17	17	44210933	rs7207582	43854536	rs62055957	0.958195	rs7207582	A	C	0.00679884	4.45462	8.404e-06	-4.92263	8.539e-07	CRHR1:RP11-105N13.4	0:0	ncRNA_intronic	2.667	6	5	14	1	1	0
17	17	44210933	rs7207582	43855228	rs4074462	0.958195	rs7207582	T	G	0.00543113	4.51279	6.398e-06	-5.00615	5.553e-07	CRHR1:RP11-105N13.4	0:0	ncRNA_intronic	6.564	1d	5	14	1	1	0
17	17	44210933	rs7207582	43856710	rs62057062	0.96339	rs7207582	A	G	0.00675629	4.45626	8.34e-06	-4.93879	7.861e-07	CRHR1:RP11-105N13.4	0:0	ncRNA_intronic	8.304	6	5	14	1	1	0
17	17	44210933	rs7207582	43856730	rs62057063	0.96339	rs7207582	T	C	0.00675629	4.45626	8.34e-06	-4.93753	7.912e-07	CRHR1:RP11-105N13.4	0:0	ncRNA_intronic	2.396	7	5	14	1	1	0
17	17	44210933	rs7207582	43857033	rs62057064	0.96339	rs7207582	T	C	0.0067141	4.45789	8.277e-06	-4.96776	6.773e-07	CRHR1:RP11-105N13.4	0:0	ncRNA_intronic	0.251	7	5	14	1	1	0
17	17	44210933	rs7207582	43857129	rs76830096	0.96339	rs7207582	C	A	0.00671477	4.45787	8.278e-06	-4.92378	8.489e-07	CRHR1:RP11-105N13.4	0:0	ncRNA_intronic	0.268	7	5	14	1	1	0
17	17	44210933	rs7207582	43858187	rs62057065	0.96339	rs7207582	T	G	0.00650307	4.46602	7.969e-06	-4.92299	8.523e-07	CRHR1:RP11-105N13.4	0:0	ncRNA_intronic	0.098	7	5	14	1	1	0
17	17	44210933	rs7207582	43858326	rs62057067	0.96339	rs7207582	T	C	0.00650307	4.46602	7.969e-06	-4.92651	8.371e-07	CRHR1:RP11-105N13.4	0:0	ncRNA_intronic	1.35	7	5	14	1	1	0
17	17	44210933	rs7207582	43858482	rs78917495	0.96339	rs7207582	T	C	0.00666276	4.45987	8.201e-06	-4.9022	9.477e-07	CRHR1:RP11-105N13.4	0:0	ncRNA_intronic	0.925	5	5	14	1	1	0
17	17	44210933	rs7207582	43858629	rs62057068	0.96339	rs7207582	G	A	0.00646312	4.46755	7.912e-06	-4.94655	7.554e-07	CRHR1:RP11-105N13.4	0:0	ncRNA_intronic	8.699	5	5	13	1	1	0
17	17	44210933	rs7207582	43859065	rs62057069	0.96339	rs7207582	C	T	0.00637593	4.4709	7.789e-06	-4.87997	1.061e-06	CRHR1:RP11-105N13.4	0:0	ncRNA_intronic	4.852	5	5	13	1	1	0
17	17	44210933	rs7207582	43859640	rs62057070	0.96339	rs7207582	G	A	0.00637593	4.4709	7.789e-06	-4.95565	7.209e-07	CRHR1:RP11-105N13.4	0:0	ncRNA_intronic	2.661	5	5	13	1	1	0
17	17	44210933	rs7207582	43861117	rs62057073	0.96339	rs7207582	T	C	0.00633722	4.47239	7.735e-06	-4.87447	1.091e-06	CRHR1:RP11-105N13.4	0:0	ncRNA_intronic	8.826	4	1	11	1	1	0
17	17	44210933	rs7207582	43871982	rs56319902	0.96339	rs7207582	T	C	0.0061387	4.48052	7.446e-06	-4.87739	1.075e-06	CRHR1:RP11-105N13.4	0:0	ncRNA_intronic	2.15	5	5	14	1	1	0
17	17	44210933	rs7207582	43872228	rs55943044	0.96339	rs7207582	A	G	0.00633722	4.47239	7.735e-06	-4.87071	1.112e-06	CRHR1:RP11-105N13.4	0:0	ncRNA_intronic	0.478	4	5	14	1	1	0
17	17	44210933	rs7207582	43879308	rs80184151	0.96339	rs7207582	G	A	0.00614058	4.48044	7.449e-06	-4.72064	2.351e-06	CRHR1:RP11-105N13.4	0:0	ncRNA_intronic	0.448	5	5	14	1	1	0
17	17	44210933	rs7207582	43881790	rs17689378	0.9529	rs7207582	T	C	0.00565044	4.50281	6.706e-06	-4.83492	1.332e-06	CRHR1:RP11-105N13.4	0:0	ncRNA_intronic	2.946	5	5	14	1	1	0
17	17	44210933	rs7207582	43885291	rs62057101	0.96339	rs7207582	A	G	0.00604441	4.48484	7.297e-06	-4.9334	8.081e-07	CRHR1:RP11-105N13.4	0:0	ncRNA_intronic	2.39	7	5	14	1	1	0
17	17	44210933	rs7207582	43887480	rs62057103	0.96339	rs7207582	C	T	0.00589832	4.49151	7.072e-06	-4.7302	2.243e-06	CRHR1:RP11-105N13.4	0:0	ncRNA_intronic	2.734	6	5	14	1	1	0
17	17	44210933	rs7207582	43892784	rs55915917	0.882227	rs7207582	G	T	0.0125247	4.63613	3.55e-06	-4.32418	1.531e-05	CRHR1:RP11-105N13.4	0:0	ncRNA_intronic	0.572	4	5	14	1	1	0
17	17	44210933	rs7207582	43892788	rs55668363	0.88808	rs7207582	A	G	0.010489	4.6063	4.099e-06	-4.38686	1.15e-05	CRHR1:RP11-105N13.4	0:0	ncRNA_intronic	0.697	4	5	14	1	1	0
17	17	44210933	rs7207582	43892973	rs17689471	0.96339	rs7207582	C	T	0.00528525	4.51942	6.201e-06	-4.90649	9.272e-07	CRHR1:RP11-105N13.4	0:0	ncRNA_intronic	0.364	1f	5	14	1	1	0
17	17	44210933	rs7207582	43893259	rs117365970	0.96339	rs7207582	A	G	0.00542603	4.51302	6.391e-06	-4.83687	1.319e-06	CRHR1:RP11-105N13.4	0:0	ncRNA_intronic	3.226	3a	5	14	1	1	0
17	17	44210933	rs7207582	43893260	rs117646503	0.96339	rs7207582	C	T	0.00543623	4.51256	6.405e-06	-4.82859	1.375e-06	CRHR1:RP11-105N13.4	0:0	ncRNA_intronic	5.739	3a	5	14	1	1	0
17	17	44210933	rs7207582	43893403	rs17762769	0.96339	rs7207582	A	G	0.00494828	4.53589	5.736e-06	-4.94818	7.491e-07	CRHR1:RP11-105N13.4	0:0	ncRNA_intronic	2.086	1f	5	14	1	1	0
17	17	44210933	rs7207582	43893716	rs8072451	0.96339	rs7207582	T	C	0.00397721	4.59016	4.429e-06	-4.93906	7.85e-07	CRHR1:RP11-105N13.4	0:0	ncRNA_intronic	0.262	1f	5	14	1	1	0
17	17	44210933	rs7207582	43893751	rs8073146	0.96339	rs7207582	G	A	0.00405056	4.58541	4.531e-06	-4.80793	1.525e-06	CRHR1:RP11-105N13.4	0:0	ncRNA_intronic	12.93	5	5	14	1	1	0
17	17	44210933	rs7207582	43894102	rs28364025	0.96339	rs7207582	C	T	0.00525355	4.52086	6.159e-06	-4.79958	1.59e-06	CRHR1	0	intronic	0.129	5	5	15	1	1	0
17	17	44210933	rs7207582	43894159	rs28364023	0.96339	rs7207582	T	C	0.00510192	4.52773	5.962e-06	-4.76699	1.87e-06	CRHR1	0	intronic	0.095	5	5	15	1	1	0
17	17	44210933	rs7207582	43894510	rs55779147	0.96339	rs7207582	A	G	0.0050684	4.52937	5.916e-06	-4.84533	1.264e-06	CRHR1	0	intronic	1.333	5	5	15	1	1	0
17	17	44210933	rs7207582	43894547	rs56357543	0.96339	rs7207582	T	C	0.0050684	4.52937	5.916e-06	-4.80754	1.528e-06	CRHR1	0	intronic	0.722	5	5	15	1	1	0
17	17	44210933	rs7207582	43894609	rs56099546	0.96339	rs7207582	G	A	0.00499209	4.53352	5.801e-06	-4.79485	1.628e-06	CRHR1	0	intronic	14.12	5	5	15	1	1	0
17	17	44210933	rs7207582	43894990	rs739645	0.96339	rs7207582	G	T	0.00510896	4.52741	5.971e-06	-4.78265	1.73e-06	CRHR1	0	intronic	6.266	5	5	15	1	1	0
17	17	44210933	rs7207582	43895530	rs2316763	0.96339	rs7207582	T	C	0.00502611	4.53167	5.852e-06	-4.78277	1.729e-06	CRHR1	0	intronic	3.423	3a	5	15	1	1	0
17	17	44210933	rs7207582	43895602	rs2316764	0.96339	rs7207582	G	T	0.00502146	4.53192	5.845e-06	-4.71772	2.385e-06	CRHR1	0	intronic	2.579	5	5	15	1	1	0
17	17	44210933	rs7207582	43895653	rs4277389	0.96339	rs7207582	G	A	0.00492926	4.53693	5.708e-06	-4.89066	1.005e-06	CRHR1	0	intronic	1.876	1f	5	15	1	1	0
17	17	44210933	rs7207582	43895696	rs4566211	0.96339	rs7207582	A	G	0.00490603	4.53819	5.674e-06	-4.9201	8.65e-07	CRHR1	0	intronic	0.716	1f	5	15	1	1	0
17	17	44210933	rs7207582	43895751	rs4566212	0.96339	rs7207582	A	G	0.00502611	4.53167	5.852e-06	-4.78022	1.751e-06	CRHR1	0	intronic	1.308	5	5	15	1	1	0
17	17	44210933	rs7207582	43895797	rs4309444	0.96339	rs7207582	C	T	0.00502146	4.53192	5.845e-06	-4.73851	2.153e-06	CRHR1	0	intronic	9.226	5	5	15	1	1	0
17	17	44210933	rs7207582	43896032	rs62057107	0.96339	rs7207582	T	C	0.00502611	4.53167	5.852e-06	-4.77003	1.842e-06	CRHR1	0	intronic	6.718	5	5	15	1	1	0
17	17	44210933	rs7207582	43896228	rs12150390	0.96339	rs7207582	C	T	0.00502146	4.53192	5.845e-06	-4.74394	2.096e-06	CRHR1	0	intronic	17.47	5	5	15	1	1	0
17	17	44210933	rs7207582	43896616	rs62057108	0.96339	rs7207582	C	T	0.00502146	4.53192	5.845e-06	-4.76774	1.863e-06	CRHR1	0	intronic	8.076	5	5	15	1	1	0
17	17	44210933	rs7207582	43896637	rs62057109	0.96339	rs7207582	C	T	0.00502146	4.53192	5.845e-06	-4.75638	1.971e-06	CRHR1	0	intronic	4.738	5	5	15	1	1	0
17	17	44210933	rs7207582	43896690	rs78074121	0.96339	rs7207582	C	T	0.00502146	4.53192	5.845e-06	-4.75978	1.938e-06	CRHR1	0	intronic	4.229	5	5	15	1	1	0
17	17	44210933	rs7207582	43896734	rs62057110	0.96339	rs7207582	C	T	0.00502146	4.53192	5.845e-06	-4.77267	1.818e-06	CRHR1	0	intronic	4.358	5	5	15	1	1	0
17	17	44210933	rs7207582	43897130	rs62057111	0.96339	rs7207582	G	A	0.00499209	4.53352	5.801e-06	-4.77345	1.811e-06	CRHR1	0	intronic	6.224	5	5	15	1	1	0
17	17	44210933	rs7207582	43897246	rs78587102	0.96339	rs7207582	G	A	0.00499209	4.53352	5.801e-06	-4.81004	1.509e-06	CRHR1	0	intronic	3.76	5	5	15	1	1	0
17	17	44210933	rs7207582	43897480	rs78506181	0.96339	rs7207582	G	A	0.00499209	4.53352	5.801e-06	-4.79732	1.608e-06	CRHR1	0	intronic	1.224	5	5	15	1	1	0
17	17	44210933	rs7207582	43897722	rs79600142	0.96339	rs7207582	C	T	0.00499209	4.53352	5.801e-06	-4.85897	1.18e-06	CRHR1	0	intronic	1.141	5	5	15	1	1	0
17	17	44210933	rs7207582	43898459	rs111739681	0.96339	rs7207582	T	C	0.0049961	4.5333	5.807e-06	-4.78735	1.69e-06	CRHR1	0	intronic	10.35	5	5	15	1	1	0
17	17	44210933	rs7207582	43898887	rs17762882	0.96339	rs7207582	C	T	0.00499209	4.53352	5.801e-06	-4.76062	1.93e-06	CRHR1	0	intronic	0.436	5	5	15	1	1	0
17	17	44210933	rs7207582	43899161	rs17762912	0.96339	rs7207582	C	A	0.00502146	4.53192	5.845e-06	-4.77025	1.84e-06	CRHR1	0	intronic	5.16	5	5	15	1	1	0
17	17	44210933	rs7207582	43899401	rs62057114	0.96339	rs7207582	T	C	0.00502611	4.53167	5.852e-06	-4.71501	2.417e-06	CRHR1	0	intronic	1.984	5	5	15	1	1	0
17	17	44210933	rs7207582	43899611	rs78917479	0.96339	rs7207582	T	C	0.00502611	4.53167	5.852e-06	-4.72369	2.316e-06	CRHR1	0	intronic	3.581	5	5	15	1	1	0
17	17	44210933	rs7207582	43899655	rs62057116	0.96339	rs7207582	C	T	0.00502146	4.53192	5.845e-06	-4.73431	2.198e-06	CRHR1	0	intronic	2.165	5	5	15	1	1	0
17	17	44210933	rs7207582	43899727	rs62057118	0.96339	rs7207582	G	A	0.00502146	4.53192	5.845e-06	-4.70234	2.572e-06	CRHR1	0	intronic	6.4	5	5	15	1	1	0
17	17	44210933	rs7207582	43899736	rs62057119	0.96339	rs7207582	A	G	0.00502611	4.53167	5.852e-06	-4.69856	2.62e-06	CRHR1	0	intronic	0.014	5	5	15	1	1	0
17	17	44210933	rs7207582	43899786	rs17762954	0.96339	rs7207582	T	C	0.00505655	4.53001	5.898e-06	-4.84392	1.273e-06	CRHR1	0	intronic	10.48	1f	5	15	1	1	0
17	17	44210933	rs7207582	43900434	rs55638417	0.96339	rs7207582	G	A	0.00505061	4.53034	5.889e-06	-4.75454	1.989e-06	CRHR1	0	intronic	6.306	7	5	15	1	1	0
17	17	44210933	rs7207582	43900697	rs79501144	0.96339	rs7207582	T	C	0.00508703	4.52841	5.943e-06	-4.75607	1.974e-06	CRHR1	0	intronic	3.766	4	5	15	1	1	0
17	17	44210933	rs7207582	43900817	rs112137135	0.96339	rs7207582	G	A	0.00508021	4.52873	5.934e-06	-4.77278	1.817e-06	CRHR1	0	intronic	7.258	4	5	15	1	1	0
17	17	44210933	rs7207582	43901001	rs62057122	0.96339	rs7207582	T	C	0.00493606	4.53656	5.718e-06	-4.75373	1.997e-06	CRHR1	0	intronic	3.68	5	5	15	1	1	0
17	17	44210933	rs7207582	43901238	rs62057123	0.96339	rs7207582	G	A	0.0051152	4.52713	5.979e-06	-4.72334	2.32e-06	CRHR1	0	intronic	5.413	5	5	15	1	1	0
17	17	44210933	rs7207582	43901528	rs62057143	0.96339	rs7207582	C	T	0.00515018	4.52555	6.024e-06	-4.82134	1.426e-06	CRHR1	0	intronic	3.287	5	5	15	1	1	0
17	17	44210933	rs7207582	43901558	rs62057144	0.96339	rs7207582	G	A	0.00515018	4.52555	6.024e-06	-4.83732	1.316e-06	CRHR1	0	intronic	5.68	5	5	15	1	1	0
17	17	44210933	rs7207582	43902216	rs4335809	0.96339	rs7207582	T	C	0.00526414	4.52038	6.173e-06	-4.74059	2.131e-06	CRHR1	0	intronic	3.622	5	5	14	1	1	0
17	17	44210933	rs7207582	43902505	rs4341787	0.958005	rs7207582	T	C	0.00597031	4.48822	7.182e-06	-4.81966	1.438e-06	CRHR1	0	intronic	19.39	5	5	14	1	1	0
17	17	44210933	rs7207582	43902522	rs4523962	0.96339	rs7207582	A	G	0.00530027	4.51874	6.221e-06	-4.80416	1.554e-06	CRHR1	0	intronic	11.51	5	5	14	1	1	0
17	17	44210933	rs7207582	43902541	rs4327090	0.772783	rs7207582	G	A	0.0213761	4.11392	3.89e-05	-5.15406	2.549e-07	CRHR1	0	intronic	6.761	5	5	14	1	1	0
17	17	44210933	rs7207582	43902738	rs3885074	0.96339	rs7207582	A	C	0.00533612	4.51711	6.269e-06	-4.79745	1.607e-06	CRHR1	0	intronic	2.739		5	14	1	1	0
17	17	44210933	rs7207582	43902799	rs3885075	0.96339	rs7207582	G	A	0.00533091	4.51734	6.262e-06	-4.80571	1.542e-06	CRHR1	0	intronic	0.492		5	14	1	1	0
17	17	44210933	rs7207582	43902842	rs41280116	0.96339	rs7207582	T	C	0.00533612	4.51711	6.269e-06	-4.79546	1.623e-06	CRHR1	0	intronic	3.905	5	5	14	1	1	0
17	17	44210933	rs7207582	43902861	rs34283254	0.96339	rs7207582	A	C	0.00515946	4.52512	6.036e-06	-4.79435	1.632e-06	CRHR1	0	exonic	1.015	5	5	14	1	1	0
17	17	44210933	rs7207582	43902944	rs1912151	0.96339	rs7207582	T	C	0.00537244	4.51546	6.318e-06	-4.8485	1.244e-06	CRHR1	0	UTR3	2.785		5	14	1	1	0
17	17	44210933	rs7207582	43902997	rs1396862	0.96339	rs7207582	A	G	0.00537244	4.51546	6.318e-06	-4.92848	8.287e-07	CRHR1	0	intronic	0.045		5	14	1	1	0
17	17	44210933	rs7207582	43903089	rs41280118	0.96339	rs7207582	T	C	0.00537244	4.51546	6.318e-06	-4.77467	1.8e-06	CRHR1	0	intronic	1.004	5	5	14	1	1	0
17	17	44210933	rs7207582	43903106	rs62057146	0.96339	rs7207582	G	A	0.00536579	4.51576	6.309e-06	-4.77715	1.778e-06	CRHR1	0	intronic	2.759	5	5	14	1	1	0
17	17	44210933	rs7207582	43903298	rs62057147	0.96339	rs7207582	A	G	0.00551566	4.50895	6.515e-06	-4.73293	2.213e-06	CRHR1	0	intronic	2.075	5	5	14	1	1	0
17	17	44210933	rs7207582	43903336	rs17763050	0.96339	rs7207582	A	G	0.00537244	4.51546	6.318e-06	-4.84408	1.272e-06	CRHR1	0	intronic	0.116	5	5	14	1	1	0
17	17	44210933	rs7207582	43903546	rs62057149	0.96339	rs7207582	G	A	0.00536579	4.51576	6.309e-06	-4.79707	1.61e-06	CRHR1	0	intronic	0.107	5	5	14	1	1	0
17	17	44210933	rs7207582	43903548	rs62057150	0.96339	rs7207582	T	C	0.00537244	4.51546	6.318e-06	-4.7851	1.709e-06	CRHR1	0	intronic	6.438	5	5	14	1	1	0
17	17	44210933	rs7207582	43903842	rs62057151	0.927674	rs7207582	T	C	0.0109177	4.55724	5.183e-06	-4.37273	1.227e-05	CRHR1	0	intronic	0.214	5	5	14	1	1	0
17	17	44210933	rs7207582	43904397	rs17689824	0.96339	rs7207582	T	C	0.00508703	4.52841	5.943e-06	-4.86493	1.145e-06	CRHR1	0	intronic	4.425	1f	5	14	1	1	0
17	17	44210933	rs7207582	43904528	rs62057153	0.96339	rs7207582	C	T	0.00525355	4.52086	6.159e-06	-4.81164	1.497e-06	CRHR1	0	intronic	1.771	5	5	14	1	1	0
17	17	44210933	rs7207582	43904610	rs62057154	0.96339	rs7207582	T	C	0.00544424	4.5122	6.416e-06	-4.80545	1.544e-06	CRHR1	0	intronic	0.841	5	5	14	1	1	0
17	17	44210933	rs7207582	43904673	rs62057155	0.96339	rs7207582	T	C	0.00544424	4.5122	6.416e-06	-4.80571	1.542e-06	CRHR1	0	intronic	3.019	4	5	14	1	1	0
17	17	44210933	rs7207582	43905134	rs78872653	0.96339	rs7207582	A	G	0.00551566	4.50895	6.515e-06	-4.79882	1.596e-06	CRHR1	0	intronic	0.451	5	5	14	1	1	0
17	17	44210933	rs7207582	43905481	rs17763086	0.96339	rs7207582	G	T	0.00508625	4.52844	5.942e-06	-4.89583	9.789e-07	CRHR1	0	intronic	0.042	1f	5	14	1	1	0
17	17	44210933	rs7207582	43906726	rs17425752	0.95829	rs7207582	C	A	0.00672149	4.45761	8.288e-06	-4.78546	1.706e-06	CRHR1	0	intronic	2.573	5	5	15	1	1	0
17	17	44210933	rs7207582	43906828	rs17689882	0.95829	rs7207582	A	G	0.00640586	4.46975	7.831e-06	-4.83225	1.35e-06	CRHR1	0	intronic	6.828	1f	4	15	1	1	0
17	17	44210933	rs7207582	43907143	rs62057158	0.96339	rs7207582	A	G	0.0055648	4.50671	6.584e-06	-4.70068	2.593e-06	CRHR1	0	intronic	8.096	5	4	15	1	1	0
17	17	44210933	rs7207582	43907745	rs1876831	0.96339	rs7207582	T	C	0.0055648	4.50671	6.584e-06	-4.89105	1.003e-06	CRHR1	0	intronic	3.27		5	15	1	1	0
17	17	44210933	rs7207582	43907896	rs16940665	0.96339	rs7207582	C	T	0.00549125	4.51006	6.481e-06	-4.91917	8.691e-07	CRHR1	0	exonic	10.05	1f	5	15	1	1	0
17	17	44210933	rs7207582	43907966	rs16940668	0.96339	rs7207582	A	G	0.00559798	4.5052	6.631e-06	-4.7708	1.835e-06	CRHR1	0	intronic	1.686	5	5	15	1	1	0
17	17	44210933	rs7207582	43908151	rs16940671	0.96339	rs7207582	T	C	0.00559798	4.5052	6.631e-06	-4.73367	2.205e-06	CRHR1	0	intronic	6.787	5	5	15	1	1	0
17	17	44210933	rs7207582	43908152	rs16940672	0.96339	rs7207582	T	C	0.00559798	4.5052	6.631e-06	-4.75262	2.008e-06	CRHR1	0	intronic	0.756	5	5	15	1	1	0
17	17	44210933	rs7207582	43908826	rs55865707	0.96339	rs7207582	G	T	0.00559657	4.50527	6.629e-06	-4.76527	1.886e-06	CRHR1	0	intronic	9.202	5	5	14	1	1	0
17	17	44210933	rs7207582	43908989	rs62054760	0.94819	rs7207582	T	C	0.00868252	4.38838	1.142e-05	-4.66053	3.154e-06	CRHR1	0	intronic	2.161	5	5	14	1	1	0
17	17	44210933	rs7207582	43909008	rs62054761	0.94819	rs7207582	T	C	0.00868252	4.38838	1.142e-05	-4.69143	2.713e-06	CRHR1	0	intronic	4.938	5	5	14	1	1	0
17	17	44210933	rs7207582	43909022	rs62054762	0.94819	rs7207582	T	G	0.00868252	4.38838	1.142e-05	-4.70361	2.556e-06	CRHR1	0	intronic	3.556	5	5	14	1	1	0
17	17	44210933	rs7207582	43910088	rs17689918	0.96339	rs7207582	A	G	0.00501147	4.53246	5.83e-06	-4.96424	6.897e-07	CRHR1	0	intronic	3.79	1f	5	15	1	1	0
17	17	44210933	rs7207582	43910183	rs17763199	0.958158	rs7207582	A	G	0.00542822	4.51292	6.394e-06	-4.78998	1.668e-06	CRHR1	0	intronic	0.66	5	5	15	1	1	0
17	17	44210933	rs7207582	43910507	rs16940674	0.96339	rs7207582	T	C	0.00538571	4.51486	6.336e-06	-4.95122	7.375e-07	CRHR1	0	exonic	17.55	1f	5	15	1	1	0
17	17	44210933	rs7207582	43911036	rs16940676	0.95829	rs7207582	A	G	0.0049415	4.53626	5.726e-06	-4.7895	1.672e-06	CRHR1	0	intronic	0.531	5	5	15	1	1	0
17	17	44210933	rs7207582	43911352	rs1876830	0.96339	rs7207582	T	C	0.00538571	4.51486	6.336e-06	-4.78463	1.713e-06	CRHR1	0	intronic	4.044		5	15	1	1	0
17	17	44210933	rs7207582	43911424	rs41457044	0.9529	rs7207582	T	C	0.00544714	4.51206	6.42e-06	-4.77636	1.785e-06	CRHR1	0	intronic	3.162	5	5	15	1	1	0
17	17	44210933	rs7207582	43911443	rs1876829	0.96339	rs7207582	C	T	0.00549125	4.51006	6.481e-06	-4.94609	7.572e-07	CRHR1	0	intronic	5.472		5	15	1	1	0
17	17	44210933	rs7207582	43911525	rs1876828	0.96339	rs7207582	T	C	0.00555203	4.50729	6.566e-06	-4.78416	1.717e-06	CRHR1	0	intronic	0.766		5	15	1	1	0
17	17	44210933	rs7207582	43911832	rs1876827	0.96339	rs7207582	C	T	0.00538571	4.51486	6.336e-06	-4.80885	1.518e-06	CRHR1	0	intronic	3.947		5	15	1	1	0
17	17	44210933	rs7207582	43911898	rs16940677	0.96339	rs7207582	T	C	0.00484527	4.54148	5.586e-06	-4.80122	1.577e-06	CRHR1	0	intronic	0.987	1f	5	15	1	1	0
17	17	44210933	rs7207582	43912282	rs28364021	0.96339	rs7207582	T	C	0.00520559	4.52303	6.096e-06	-4.75947	1.941e-06	CRHR1	0	UTR3	1.179	4	5	15	1	1	0
17	17	44210933	rs7207582	43912454	rs2316765	0.96339	rs7207582	C	T	0.00538571	4.51486	6.336e-06	-4.75916	1.944e-06	CRHR1	0	UTR3	11.01	4	5	15	1	1	0
17	17	44210933	rs7207582	43912582	rs878887	0.96339	rs7207582	T	C	0.00556622	4.50665	6.586e-06	-4.90928	9.141e-07	CRHR1	0	UTR3	2.672	1d	5	15	1	1	0
17	17	44210933	rs7207582	43912635	rs878888	0.96339	rs7207582	G	A	0.00575295	4.49814	6.855e-06	-4.78806	1.684e-06	CRHR1	0	UTR3	5.23	4	5	15	1	1	0
17	17	44210933	rs7207582	43912723	rs4525537	0.96339	rs7207582	C	T	0.00557471	4.50626	6.598e-06	-4.78998	1.668e-06	CRHR1	0	UTR3	9.437	4	5	15	1	1	0
17	17	44210933	rs7207582	43912830	rs4482334	0.96339	rs7207582	C	T	0.00557471	4.50626	6.598e-06	-4.74135	2.123e-06	CRHR1	0	UTR3	1.673	5	5	15	1	1	0
17	17	44210933	rs7207582	43913315	rs56127111	0.96339	rs7207582	T	C	0.00556622	4.50665	6.586e-06	-4.78499	1.71e-06	CRHR1	120	downstream	0.51	5	5	15	1	1	0
17	17	44210933	rs7207582	43913557	rs75104593	0.952876	rs7207582	G	T	0.00600203	4.48677	7.231e-06	-4.67806	2.896e-06	CRHR1	362	downstream	4.908	2b	5	15	1	1	0
17	17	44210933	rs7207582	43913558	rs74998289	0.952876	rs7207582	G	T	0.00600203	4.48677	7.231e-06	-4.65748	3.201e-06	CRHR1	363	downstream	0.233	2b	5	15	1	1	0
17	17	44210933	rs7207582	43914554	rs10445362	0.96339	rs7207582	A	C	0.0056015	4.50504	6.636e-06	-4.77179	1.826e-06	CRHR1	1359	intergenic	4.857	5	5	15	1	1	0
17	17	44210933	rs7207582	43914558	rs10445363	0.96339	rs7207582	A	G	0.00542238	4.51319	6.386e-06	-4.81828	1.448e-06	CRHR1	1363	intergenic	0.374	5	5	15	1	1	0
17	17	44210933	rs7207582	43914728	rs62054803	0.96339	rs7207582	T	G	0.0056015	4.50504	6.636e-06	-4.79933	1.592e-06	CRHR1	1533	intergenic	1.312	5	5	15	1	1	0
17	17	44210933	rs7207582	43914809	rs62054804	0.96339	rs7207582	T	C	0.0056015	4.50504	6.636e-06	-4.81297	1.487e-06	CRHR1	1614	intergenic	0.116	5	5	15	1	1	0
17	17	44210933	rs7207582	43915054	rs62054805	0.96339	rs7207582	G	A	0.00560992	4.50466	6.648e-06	-4.7642	1.896e-06	CRHR1	1859	intergenic	5.144	2b	5	15	1	1	0
17	17	44210933	rs7207582	43915312	rs62054806	0.96339	rs7207582	T	C	0.00555203	4.50729	6.566e-06	-4.80224	1.569e-06	CRHR1	2117	intergenic	0.468	5	5	15	1	1	0
17	17	44210933	rs7207582	43916356	rs10445364	0.96339	rs7207582	A	G	0.00558742	4.50568	6.616e-06	-4.90783	9.209e-07	CRHR1	3161	intergenic	1.099	1f	5	15	1	1	0
17	17	44210933	rs7207582	43916509	rs10445333	0.96339	rs7207582	G	A	0.00558036	4.506	6.606e-06	-4.80754	1.528e-06	CRHR1	3314	intergenic	9.333	5	5	15	1	1	0
17	17	44210933	rs7207582	43916773	rs17690176	0.958195	rs7207582	C	A	0.00567957	4.50149	6.748e-06	-4.76156	1.921e-06	CRHR1	3578	intergenic	5.131	5	5	15	1	1	0
17	17	44210933	rs7207582	43916932	rs78328427	0.96339	rs7207582	A	G	0.00558742	4.50568	6.616e-06	-4.73832	2.155e-06	CRHR1	3737	intergenic	1.506	5	5	15	1	1	0
17	17	44210933	rs7207582	43917086	rs77692262	0.96339	rs7207582	G	A	0.00558036	4.506	6.606e-06	-4.82629	1.391e-06	CRHR1	3891	intergenic	5.523	5	5	15	1	1	0
17	17	44210933	rs7207582	43917776	rs56023973	0.96339	rs7207582	T	G	0.00562394	4.50402	6.668e-06	-4.7624	1.913e-06	MAPT-AS1	3240	intergenic	1.06	5	5	15	1	1	0
17	17	44210933	rs7207582	43917818	rs17763515	0.96339	rs7207582	A	G	0.00577806	4.497	6.892e-06	-4.79958	1.59e-06	MAPT-AS1	3198	intergenic	2.528	5	5	15	1	1	0
17	17	44210933	rs7207582	43918190	rs17763533	0.96339	rs7207582	C	T	0.00508021	4.52873	5.934e-06	-4.93239	8.123e-07	MAPT-AS1	2826	intergenic	0.248	1f	5	15	1	1	0
17	17	44210933	rs7207582	43918239	rs62054809	0.96339	rs7207582	T	C	0.00562394	4.50402	6.668e-06	-4.80885	1.518e-06	MAPT-AS1	2777	intergenic	0.606	7	5	15	1	1	0
17	17	44210933	rs7207582	43918418	rs112583797	0.96339	rs7207582	G	A	0.00561553	4.5044	6.656e-06	-4.74686	2.066e-06	MAPT-AS1	2598	intergenic	1.863	7	5	15	1	1	0
17	17	44210933	rs7207582	43918524	rs74922289	0.96339	rs7207582	G	A	0.00561553	4.5044	6.656e-06	-4.783	1.727e-06	MAPT-AS1	2492	intergenic	12.82		5	15	1	1	0
17	17	44210933	rs7207582	43918613	rs56971664	0.96339	rs7207582	C	T	0.00396774	4.59078	4.416e-06	-4.7967	1.613e-06	MAPT-AS1	2403	intergenic	2.24	5	5	15	1	1	0
17	17	44210933	rs7207582	43919105	rs2106785	0.95829	rs7207582	T	C	0.00704937	4.44496	8.791e-06	-4.78711	1.692e-06	MAPT-AS1	1911	intergenic	2.898		5	15	1	1	0
17	17	44210933	rs7207582	43919301	rs56150806	0.96339	rs7207582	C	T	0.00561553	4.5044	6.656e-06	-4.80584	1.541e-06	MAPT-AS1	1715	intergenic	3.157	3a	5	15	1	1	0
17	17	44210933	rs7207582	43919884	rs17690314	0.96339	rs7207582	G	T	0.00552639	4.50846	6.53e-06	-4.9112	9.052e-07	MAPT-AS1	1132	intergenic	0.244	1f	5	15	1	1	0
17	17	44210933	rs7207582	43920300	rs56233672	0.96339	rs7207582	C	T	0.00549125	4.51006	6.481e-06	-4.84191	1.286e-06	MAPT-AS1	716	downstream	0.736	7	5	15	1	1	0
17	17	44210933	rs7207582	43920378	rs56354807	0.96339	rs7207582	T	C	0.00549341	4.50996	6.484e-06	-4.81677	1.459e-06	MAPT-AS1	638	downstream	2.043	7	5	15	1	1	0
17	17	44210933	rs7207582	43920411	rs55718212	0.96339	rs7207582	C	T	0.00549125	4.51006	6.481e-06	-4.81338	1.484e-06	MAPT-AS1	605	downstream	5.507	6	5	15	1	1	0
17	17	44210933	rs7207582	43920974	rs17690326	0.96339	rs7207582	C	T	0.00540115	4.51415	6.357e-06	-4.98535	6.185e-07	MAPT-AS1	42	downstream	0.997	1f	5	15	1	1	0
17	17	44210933	rs7207582	43921210	rs17763596	0.96339	rs7207582	T	G	0.00529052	4.51918	6.208e-06	-4.91408	8.92e-07	MAPT-AS1	0	ncRNA_exonic	0.826	1f	5	15	1	1	0
17	17	44210933	rs7207582	43921754	rs17763634	0.96339	rs7207582	C	T	0.00529577	4.51894	6.215e-06	-4.88091	1.056e-06	MAPT-AS1	0	ncRNA_intronic	1.123	1f	5	15	1	1	0
17	17	44210933	rs7207582	43922942	rs62621252	0.96339	rs7207582	C	T	0.00533091	4.51734	6.262e-06	-4.79325	1.641e-06	MAPT-AS1:SPPL2C	0:0	exonic	6.315	5	5	15	1	1	0
17	17	44210933	rs7207582	43923266	rs62054815	0.96339	rs7207582	A	G	0.0048978	4.53863	5.662e-06	-4.7572	1.963e-06	MAPT-AS1:SPPL2C	0:0	exonic	0.018	5	5	15	1	1	0
17	17	44210933	rs7207582	43923683	rs12185268	0.96339	rs7207582	G	A	0.00720973	4.43876	9.048e-06	-4.96092	7.016e-07	MAPT-AS1:SPPL2C	0:0	exonic	8.654	1f	5	15	1	1	0
17	17	44210933	rs7207582	43923703	rs12185235	0.96339	rs7207582	T	C	0.0067995	4.4546	8.405e-06	-4.89668	9.747e-07	MAPT-AS1:SPPL2C	0:0	exonic	5.04	1f	5	15	1	1	0
17	17	44210933	rs7207582	43923934	rs11079725	0.96339	rs7207582	C	T	0.00537244	4.51546	6.318e-06	-4.9229	8.527e-07	MAPT-AS1:SPPL2C	0:0	exonic	0.169	1f	5	15	1	1	0
17	17	44210933	rs7207582	43924073	rs12373123	0.96339	rs7207582	C	T	0.00589304	4.49175	7.064e-06	-4.94972	7.432e-07	MAPT-AS1:SPPL2C	0:0	exonic	23.3	1f	5	15	1	1	0
17	17	44210933	rs7207582	43924130	rs12373139	0.96339	rs7207582	A	G	0.00484527	4.54148	5.586e-06	-4.94601	7.575e-07	MAPT-AS1:SPPL2C	0:0	exonic	4.046	1f	5	15	1	1	0
17	17	44210933	rs7207582	43924219	rs12373124	0.96339	rs7207582	C	T	0.00572497	4.49942	6.814e-06	-4.84914	1.24e-06	MAPT-AS1:SPPL2C	0:0	exonic	0.387		5	15	1	1	0
17	17	44210933	rs7207582	43924231	rs12373140	0.96339	rs7207582	A	G	0.00572839	4.49926	6.819e-06	-4.82387	1.408e-06	MAPT-AS1:SPPL2C	0:0	exonic	12.99	5	5	15	1	1	0
17	17	44210933	rs7207582	43924337	rs12373168	0.947891	rs7207582	C	A	0.00292023	4.66421	3.098e-06	-4.97672	6.467e-07	MAPT-AS1:SPPL2C	0:0	ncRNA_intronic	6.155	1f	5	15	1	1	0
17	17	44210933	rs7207582	43924521	rs17690661	0.96339	rs7207582	A	G	0.00579967	4.49601	6.924e-06	-4.95236	7.332e-07	MAPT-AS1	0	ncRNA_intronic	0.069	1f	5	15	1	1	0
17	17	44210933	rs7207582	43924776	rs55943825	0.96339	rs7207582	T	C	0.0058359	4.49436	6.978e-06	-4.79832	1.6e-06	MAPT-AS1	0	ncRNA_intronic	0.414	5	5	15	1	1	0
17	17	44210933	rs7207582	43924803	rs17690679	0.96339	rs7207582	G	A	0.00565044	4.50281	6.706e-06	-4.96616	6.829e-07	MAPT-AS1	0	ncRNA_intronic	6.843	1f	5	15	1	1	0
17	17	44210933	rs7207582	43925605	rs17769490	0.958195	rs7207582	A	G	0.00638592	4.47052	7.803e-06	-4.90907	9.151e-07	MAPT-AS1	0	ncRNA_intronic	5.553	1f	5	14	1	1	0
17	17	44210933	rs7207582	43925729	rs77063768	0.958195	rs7207582	G	A	0.00603801	4.48513	7.287e-06	-4.7924	1.648e-06	MAPT-AS1	0	ncRNA_intronic	5.467	5	5	14	1	1	0
17	17	44210933	rs7207582	43925966	rs62054817	0.958195	rs7207582	A	G	0.00647226	4.4672	7.925e-06	-4.72493	2.302e-06	MAPT-AS1	0	ncRNA_intronic	1.563	4	5	14	1	1	0
17	17	44210933	rs7207582	43926056	rs62054818	0.958195	rs7207582	C	A	0.00600332	4.48671	7.233e-06	-4.79362	1.638e-06	MAPT-AS1	0	ncRNA_intronic	6.949	4	2	14	1	1	0
17	17	44210933	rs7207582	43926149	rs62054819	0.958195	rs7207582	G	A	0.00600332	4.48671	7.233e-06	-4.7997	1.589e-06	MAPT-AS1	0	ncRNA_intronic	5.198	4	2	14	1	1	0
17	17	44210933	rs7207582	43926755	rs62054820	0.958195	rs7207582	G	A	0.00589436	4.49169	7.066e-06	-4.80623	1.538e-06	MAPT-AS1	0	ncRNA_intronic	3.67	5	5	14	1	1	0
17	17	44210933	rs7207582	43926948	rs56113217	0.958195	rs7207582	G	A	0.00589436	4.49169	7.066e-06	-4.82472	1.402e-06	MAPT-AS1	0	ncRNA_intronic	0.033	4	5	14	1	1	0
17	17	44210933	rs7207582	43926992	rs56269136	0.958195	rs7207582	T	C	0.005897	4.49157	7.07e-06	-4.82218	1.42e-06	MAPT-AS1	0	ncRNA_intronic	7.713	4	5	14	1	1	0
17	17	44210933	rs7207582	43927255	rs56385754	0.958195	rs7207582	T	G	0.005897	4.49157	7.07e-06	-4.7946	1.63e-06	MAPT-AS1	0	ncRNA_intronic	0.958	5	5	14	1	1	0
17	17	44210933	rs7207582	43927290	rs17769552	0.917729	rs7207582	A	G	0.0123532	4.28774	1.805e-05	-4.80186	1.572e-06	MAPT-AS1	0	ncRNA_intronic	1.021	1f	5	14	1	1	0
17	17	44210933	rs7207582	43927708	rs62054822	0.958195	rs7207582	G	A	0.00516486	4.52488	6.043e-06	-4.75771	1.958e-06	MAPT-AS1	0	ncRNA_intronic	4.196	5	5	14	1	1	0
17	17	44210933	rs7207582	43928614	rs885639	0.958195	rs7207582	G	T	0.00309364	4.65077	3.307e-06	-4.88373	1.041e-06	MAPT-AS1	0	ncRNA_intronic	1.429		5	14	1	1	0
17	17	44210933	rs7207582	43929029	rs62054823	0.94779	rs7207582	G	A	0.0057037	4.50039	6.783e-06	-4.81365	1.482e-06	MAPT-AS1	0	ncRNA_intronic	4.545	5	5	14	1	1	0
17	17	44210933	rs7207582	43929992	rs62054824	0.96339	rs7207582	T	C	0.00570919	4.50014	6.791e-06	-4.71142	2.46e-06	MAPT-AS1	0	ncRNA_intronic	0.169	4	2	14	1	1	0
17	17	44210933	rs7207582	43930033	rs62054825	0.958005	rs7207582	A	G	0.00595796	4.48879	7.163e-06	-4.78902	1.676e-06	MAPT-AS1	0	ncRNA_intronic	1.442	2b	1	14	1	1	0
17	17	44210933	rs7207582	43930238	rs79589869	0.96339	rs7207582	A	C	0.00580371	4.49583	6.93e-06	-4.8011	1.578e-06	MAPT-AS1	0	ncRNA_intronic	7.3	4	5	14	1	1	0
17	17	44210933	rs7207582	43930798	rs2316769	0.96339	rs7207582	G	A	0.00606673	4.48382	7.332e-06	-4.76474	1.891e-06	MAPT-AS1	0	ncRNA_intronic	1.441	7	5	14	1	1	0
17	17	44210933	rs7207582	43930955	rs2873268	0.96339	rs7207582	A	G	0.00587716	4.49248	7.04e-06	-4.85269	1.218e-06	MAPT-AS1	0	ncRNA_intronic	3.423	7	5	14	1	1	0
17	17	44210933	rs7207582	43930980	rs4340365	0.96339	rs7207582	T	C	0.00587716	4.49248	7.04e-06	-4.84191	1.286e-06	MAPT-AS1	0	ncRNA_intronic	4.253	7	5	14	1	1	0
17	17	44210933	rs7207582	43931122	rs2873269	0.96339	rs7207582	T	C	0.00584191	4.49408	6.987e-06	-4.93854	7.871e-07	MAPT-AS1	0	ncRNA_intronic	4.123	6	5	14	1	1	0
17	17	44210933	rs7207582	43931245	rs56329743	0.96339	rs7207582	A	G	0.0057936	4.49629	6.915e-06	-4.86303	1.156e-06	MAPT-AS1	0	ncRNA_intronic	9.537	5	5	14	1	1	0
17	17	44210933	rs7207582	43931380	rs56288604	0.96339	rs7207582	G	A	0.00584392	4.49399	6.99e-06	-4.84691	1.254e-06	MAPT-AS1	0	ncRNA_intronic	0.499	5	5	14	1	1	0
17	17	44210933	rs7207582	43931626	rs17690987	0.96339	rs7207582	C	T	0.00599687	4.48701	7.223e-06	-4.82022	1.434e-06	MAPT-AS1	0	ncRNA_intronic	8.747	3a	5	14	1	1	0
17	17	44210933	rs7207582	43931907	rs56146262	0.96339	rs7207582	A	C	0.00603225	4.48539	7.278e-06	-4.73888	2.149e-06	MAPT-AS1	0	ncRNA_intronic	0.044	2b	5	14	1	1	0
17	17	44210933	rs7207582	43932028	rs55942528	0.96339	rs7207582	G	A	0.00587385	4.49263	7.035e-06	-4.77112	1.832e-06	MAPT-AS1	0	ncRNA_intronic	0.086	5	5	14	1	1	0
17	17	44210933	rs7207582	43932049	rs56254732	0.96339	rs7207582	T	C	0.0062106	4.47725	7.561e-06	-4.81084	1.503e-06	MAPT-AS1	0	ncRNA_intronic	1.543	6	5	14	1	1	0
17	17	44210933	rs7207582	43932129	rs56323304	0.958195	rs7207582	T	C	0.0064448	4.46826	7.886e-06	-4.66952	3.019e-06	MAPT-AS1	0	ncRNA_intronic	0.271	7	5	14	1	1	0
17	17	44210933	rs7207582	43932155	rs55751924	0.96339	rs7207582	G	A	0.0062106	4.47725	7.561e-06	-4.7293	2.253e-06	MAPT-AS1	0	ncRNA_intronic	0.384	6	5	14	1	1	0
17	17	44210933	rs7207582	43932173	rs55660209	0.874281	rs7207582	G	A	0.0100888	4.34654	1.383e-05	-4.73719	2.167e-06	MAPT-AS1	0	ncRNA_intronic	5.09	6	5	14	1	1	0
17	17	44210933	rs7207582	43932277	rs113856644	0.96339	rs7207582	A	G	0.0062106	4.47725	7.561e-06	-4.86841	1.125e-06	MAPT-AS1	0	ncRNA_intronic	4.078	7	5	14	1	1	0
17	17	44210933	rs7207582	43932381	rs62054831	0.96339	rs7207582	T	C	0.00632209	4.47297	7.714e-06	-4.8119	1.495e-06	MAPT-AS1	0	ncRNA_intronic	3.505	6	5	14	1	1	0
17	17	44210933	rs7207582	43932741	rs4627402	0.953224	rs7207582	T	C	0.00503673	4.53109	5.868e-06	-4.70194	2.577e-06	MAPT-AS1	0	ncRNA_intronic	2.492	5	5	14	1	1	0
17	17	44210933	rs7207582	43932798	rs10445367	0.791191	rs7207582	T	G	0.0620582	3.89549	9.8e-05	-3.66587	0.0002465	MAPT-AS1	0	ncRNA_intronic	0.461	5	5	14	1	1	0
17	17	44210933	rs7207582	43933579	rs62054832	0.94819	rs7207582	A	C	0.00626043	4.47534	7.629e-06	-4.77345	1.811e-06	MAPT-AS1	0	ncRNA_intronic	1.321	4	5	14	1	1	0
17	17	44210933	rs7207582	43933673	rs62054833	0.958005	rs7207582	C	T	0.00567334	4.50177	6.739e-06	-4.82917	1.371e-06	MAPT-AS1	0	ncRNA_intronic	2.872	6	5	14	1	1	0
17	17	44210933	rs7207582	43934314	rs62054834	0.96339	rs7207582	C	T	0.00623557	4.47629	7.595e-06	-4.86458	1.147e-06	MAPT-AS1	0	ncRNA_intronic	8.773	7	5	14	1	1	0
17	17	44210933	rs7207582	43934672	rs62054835	0.96339	rs7207582	C	A	0.00585258	4.4936	7.003e-06	-4.77069	1.836e-06	MAPT-AS1	0	ncRNA_intronic	2.7	7	5	14	0	1	0
17	17	44210933	rs7207582	43934776	rs10445369	0.96339	rs7207582	G	A	0.00581312	4.4954	6.944e-06	-4.80173	1.573e-06	MAPT-AS1	0	ncRNA_intronic	2.669	7	5	14	0	1	0
17	17	44210933	rs7207582	43934826	rs10445334	0.96339	rs7207582	G	T	0.00581312	4.4954	6.944e-06	-4.79448	1.631e-06	MAPT-AS1	0	ncRNA_intronic	0.323	6	5	14	0	1	0
17	17	44210933	rs7207582	43934948	rs10445336	0.96339	rs7207582	G	A	0.00581312	4.4954	6.944e-06	-4.81718	1.456e-06	MAPT-AS1	0	ncRNA_intronic	2.205	7	5	14	0	1	0
17	17	44210933	rs7207582	43935118	rs10445370	0.96339	rs7207582	A	G	0.00581312	4.4954	6.944e-06	-4.96699	6.8e-07	MAPT-AS1	0	ncRNA_intronic	11.29	6	5	14	0	1	0
17	17	44210933	rs7207582	43935888	rs55996632	0.96339	rs7207582	T	C	0.00588511	4.49211	7.052e-06	-4.85252	1.219e-06	MAPT-AS1	0	ncRNA_intronic	4.091	5	5	14	0	1	0
17	17	44210933	rs7207582	43936011	rs55886302	0.96339	rs7207582	G	A	0.00588709	4.49202	7.055e-06	-4.83537	1.329e-06	MAPT-AS1	0	ncRNA_intronic	4.328	5	5	14	0	1	0
17	17	44210933	rs7207582	43936298	rs56136075	0.96339	rs7207582	A	C	0.00588511	4.49211	7.052e-06	-4.86406	1.15e-06	MAPT-AS1	0	ncRNA_intronic	12.13	5	5	14	0	1	0
17	17	44210933	rs7207582	43937104	rs62054841	0.96339	rs7207582	A	G	0.00588511	4.49211	7.052e-06	-4.87178	1.106e-06	MAPT-AS1	0	ncRNA_intronic	3.767	7	5	14	0	1	0
17	17	44210933	rs7207582	43937162	rs62054842	0.96339	rs7207582	T	C	0.00588511	4.49211	7.052e-06	-4.85187	1.223e-06	MAPT-AS1	0	ncRNA_intronic	7.321	7	5	14	0	1	0
17	17	44210933	rs7207582	43937184	rs62054843	0.96339	rs7207582	C	T	0.00599234	4.48722	7.216e-06	-4.85713	1.191e-06	MAPT-AS1	0	ncRNA_intronic	2.407	6	5	14	0	1	0
17	17	44210933	rs7207582	43937333	rs62054844	0.96339	rs7207582	G	T	0.00588709	4.49202	7.055e-06	-4.85813	1.185e-06	MAPT-AS1	0	ncRNA_intronic	0.898	6	5	14	0	1	0
17	17	44210933	rs7207582	43937460	rs76627340	0.96339	rs7207582	A	G	0.00588511	4.49211	7.052e-06	-4.83627	1.323e-06	MAPT-AS1	0	ncRNA_intronic	3.872	7	5	14	0	1	0
17	17	44210933	rs7207582	43937505	rs75945623	0.96339	rs7207582	T	C	0.00588511	4.49211	7.052e-06	-4.86736	1.131e-06	MAPT-AS1	0	ncRNA_intronic	3.415	7	5	14	0	1	0
17	17	44210933	rs7207582	43937633	rs79889833	0.96339	rs7207582	G	A	0.00588709	4.49202	7.055e-06	-4.86338	1.154e-06	MAPT-AS1	0	ncRNA_intronic	4.49	7	5	14	0	1	0
17	17	44210933	rs7207582	43937671	rs77625338	0.96339	rs7207582	T	C	0.00588511	4.49211	7.052e-06	-4.86082	1.169e-06	MAPT-AS1	0	ncRNA_intronic	0.87	7	5	14	0	1	0
17	17	44210933	rs7207582	43937736	rs77489223	0.96339	rs7207582	T	C	0.00588511	4.49211	7.052e-06	-4.83507	1.331e-06	MAPT-AS1	0	ncRNA_intronic	0.758	7	5	14	0	1	0
17	17	44210933	rs7207582	43938107	rs55888391	0.96339	rs7207582	G	A	0.00588709	4.49202	7.055e-06	-4.85074	1.23e-06	MAPT-AS1	0	ncRNA_intronic	11.3	5	5	14	0	1	0
17	17	44210933	rs7207582	43938499	rs76329216	0.96339	rs7207582	A	G	0.00588511	4.49211	7.052e-06	-4.8501	1.234e-06	MAPT-AS1	0	ncRNA_intronic	0.042	5	5	14	0	1	0
17	17	44210933	rs7207582	43938634	rs62054846	0.96339	rs7207582	G	A	0.00592266	4.4904	7.109e-06	-4.85074	1.23e-06	MAPT-AS1	0	ncRNA_intronic	13.52	5	5	14	0	1	0
17	17	44210933	rs7207582	43938796	rs55646970	0.96339	rs7207582	G	A	0.00595731	4.48882	7.162e-06	-4.85074	1.23e-06	MAPT-AS1	0	ncRNA_intronic	6.223	5	5	14	0	1	0
17	17	44210933	rs7207582	43938882	rs55673092	0.96339	rs7207582	A	G	0.00595665	4.48885	7.161e-06	-4.86235	1.16e-06	MAPT-AS1	0	ncRNA_intronic	2.891	4	5	14	0	1	0
17	17	44210933	rs7207582	43939255	rs56347602	0.96339	rs7207582	C	T	0.00602712	4.48563	7.27e-06	-4.87357	1.096e-06	MAPT-AS1	0	ncRNA_intronic	3.346	6	5	14	0	1	0
17	17	44210933	rs7207582	43939432	rs56249080	0.96339	rs7207582	T	G	0.00606037	4.48411	7.322e-06	-4.81541	1.469e-06	MAPT-AS1	0	ncRNA_intronic	0.657	5	5	14	0	1	0
17	17	44210933	rs7207582	43939638	rs55719714	0.96339	rs7207582	A	G	0.00602776	4.4856	7.271e-06	-4.92119	8.602e-07	MAPT-AS1	0	ncRNA_intronic	2.246	3a	5	14	0	1	0
17	17	44210933	rs7207582	43939659	rs56299858	0.96339	rs7207582	A	G	0.00602776	4.4856	7.271e-06	-4.93625	7.964e-07	MAPT-AS1	0	ncRNA_intronic	2.435	4	5	14	0	1	0
17	17	44210933	rs7207582	43939936	rs62054857	0.96339	rs7207582	A	G	0.00602776	4.4856	7.271e-06	-4.81311	1.486e-06	MAPT-AS1	0	ncRNA_intronic	2.244	7	5	14	0	1	0
17	17	44210933	rs7207582	43940012	rs75210307	0.96339	rs7207582	C	T	0.0060978	4.48239	7.381e-06	-4.73302	2.212e-06	MAPT-AS1	0	ncRNA_intronic	5.523	5	5	14	0	1	0
17	17	44210933	rs7207582	43940020	rs74944644	0.96339	rs7207582	C	T	0.0060978	4.48239	7.381e-06	-4.74423	2.093e-06	MAPT-AS1	0	ncRNA_intronic	0.056		5	14	0	1	0
17	17	44210933	rs7207582	43940021	rs79412431	0.96339	rs7207582	A	G	0.00613745	4.48058	7.444e-06	-4.70321	2.561e-06	MAPT-AS1	0	ncRNA_intronic	0.393	5	5	14	0	1	0
17	17	44210933	rs7207582	43940188	rs62054858	0.96339	rs7207582	C	T	0.00602712	4.48563	7.27e-06	-4.89379	9.891e-07	MAPT-AS1	0	ncRNA_intronic	5.905	6	5	14	0	1	0
17	17	44210933	rs7207582	43940497	rs79406732	0.96339	rs7207582	T	C	0.00606037	4.48411	7.322e-06	-4.86167	1.164e-06	MAPT-AS1	0	ncRNA_intronic	0.213	6	5	14	0	1	0
17	17	44210933	rs7207582	43940685	rs62054859	0.96339	rs7207582	A	G	0.00606037	4.48411	7.322e-06	-4.86841	1.125e-06	MAPT-AS1	0	ncRNA_intronic	0.112	7	5	14	0	1	0
17	17	44210933	rs7207582	43941350	rs62055461	0.96339	rs7207582	T	C	0.00602776	4.4856	7.271e-06	-4.86929	1.12e-06	MAPT-AS1	0	ncRNA_intronic	9.155	5	5	14	0	1	0
17	17	44210933	rs7207582	43941476	rs62055462	0.96339	rs7207582	C	A	0.00606228	4.48402	7.325e-06	-4.85897	1.18e-06	MAPT-AS1	0	ncRNA_intronic	4.977	7	5	14	0	1	0
17	17	44210933	rs7207582	43941491	rs62055463	0.96339	rs7207582	G	A	0.00606228	4.48402	7.325e-06	-4.86562	1.141e-06	MAPT-AS1	0	ncRNA_intronic	4.676	5	5	14	0	1	0
17	17	44210933	rs7207582	43941710	rs75690239	0.96339	rs7207582	T	C	0.00602776	4.4856	7.271e-06	-4.84834	1.245e-06	MAPT-AS1	0	ncRNA_intronic	2.751	5	5	14	0	1	0
17	17	44210933	rs7207582	43941858	rs62055464	0.96339	rs7207582	G	T	0.00602712	4.48563	7.27e-06	-4.85399	1.21e-06	MAPT-AS1	0	ncRNA_intronic	11.07	5	5	14	0	1	0
17	17	44210933	rs7207582	43942656	rs62055466	0.96339	rs7207582	A	G	0.00611357	4.48167	7.406e-06	-4.78161	1.739e-06	MAPT-AS1	0	ncRNA_intronic	3.945	6	5	14	0	1	0
17	17	44210933	rs7207582	43942820	rs62055467	0.96339	rs7207582	C	T	0.00602712	4.48563	7.27e-06	-4.85449	1.207e-06	MAPT-AS1	0	ncRNA_intronic	4.123	6	5	14	0	1	0
17	17	44210933	rs7207582	43943000	rs62055468	0.96339	rs7207582	C	A	0.00611609	4.48156	7.41e-06	-4.85763	1.188e-06	MAPT-AS1	0	ncRNA_intronic	4.551	5	5	14	0	1	0
17	17	44210933	rs7207582	43943655	rs62055469	0.96339	rs7207582	C	A	0.00611609	4.48156	7.41e-06	-4.80558	1.543e-06	MAPT-AS1	0	ncRNA_intronic	6.341	5	5	14	0	1	0
17	17	44210933	rs7207582	43943657	rs62055470	0.96339	rs7207582	G	A	0.00611609	4.48156	7.41e-06	-4.87178	1.106e-06	MAPT-AS1	0	ncRNA_intronic	0.761	5	5	14	0	1	0
17	17	44210933	rs7207582	43943755	rs62055471	0.96339	rs7207582	C	T	0.00634153	4.47222	7.741e-06	-4.8651	1.144e-06	MAPT-AS1	0	ncRNA_intronic	8.77	7	5	14	0	1	0
17	17	44210933	rs7207582	43943974	rs56036719	0.96339	rs7207582	T	C	0.00611357	4.48167	7.406e-06	-4.86441	1.148e-06	MAPT-AS1	0	ncRNA_intronic	0.275	7	5	14	0	1	0
17	17	44210933	rs7207582	43944158	rs55781174	0.96339	rs7207582	T	C	0.00611357	4.48167	7.406e-06	-4.87411	1.093e-06	MAPT-AS1	0	ncRNA_intronic	0.551	7	5	14	0	1	0
17	17	44210933	rs7207582	43944204	rs12150223	0.96339	rs7207582	C	T	0.00611609	4.48156	7.41e-06	-4.84129	1.29e-06	MAPT-AS1	0	ncRNA_intronic	0.801	6	5	14	0	1	0
17	17	44210933	rs7207582	43944519	rs12150516	0.96339	rs7207582	T	C	0.00607753	4.48332	7.349e-06	-4.95793	7.125e-07	MAPT-AS1	0	ncRNA_intronic	1.306	6	5	14	0	1	0
17	17	44210933	rs7207582	43945106	rs62055475	0.96339	rs7207582	C	T	0.00608134	4.48315	7.355e-06	-4.79094	1.66e-06	MAPT-AS1	0	ncRNA_intronic	0.678	4	5	14	0	1	0
17	17	44210933	rs7207582	43945855	rs78637438	0.96339	rs7207582	A	G	0.00607753	4.48332	7.349e-06	-4.91881	8.707e-07	MAPT-AS1	0	ncRNA_intronic	3.264	5	5	14	0	1	0
17	17	44210933	rs7207582	43945931	rs2316771	0.96339	rs7207582	C	T	0.00946871	4.36401	1.277e-05	-4.87321	1.098e-06	MAPT-AS1	0	ncRNA_intronic	11.19	5	5	14	0	1	0
17	17	44210933	rs7207582	43945938	rs62055478	0.96339	rs7207582	T	C	0.00650097	4.4661	7.966e-06	-4.88735	1.022e-06	MAPT-AS1	0	ncRNA_intronic	11.34	5	5	14	0	1	0
17	17	44210933	rs7207582	43946112	rs1078830	0.96339	rs7207582	C	T	0.00650237	4.46604	7.968e-06	-5.00459	5.598e-07	MAPT-AS1	0	ncRNA_intronic	6.573	6	5	14	0	1	0
17	17	44210933	rs7207582	43946223	rs753235	0.952718	rs7207582	A	G	0.00814708	4.40599	1.053e-05	-5.00806	5.498e-07	MAPT-AS1	0	ncRNA_intronic	3.846	7	5	14	0	1	0
17	17	44210933	rs7207582	43946291	rs886249	0.888394	rs7207582	G	A	0.0332068	3.95414	7.681e-05	-4.47392	7.68e-06	MAPT-AS1	0	ncRNA_intronic	0.356		5	14	0	1	0
17	17	44210933	rs7207582	43946318	rs753236	0.9529	rs7207582	C	T	0.00751838	4.4268	9.564e-06	-4.63735	3.529e-06	MAPT-AS1	0	ncRNA_intronic	6.303	6	5	14	0	1	0
17	17	44210933	rs7207582	43946423	rs2316772	0.952657	rs7207582	C	A	0.0053717	4.51549	6.317e-06	-4.80072	1.581e-06	MAPT-AS1	0	ncRNA_intronic	8.687	6	5	14	0	1	0
17	17	44210933	rs7207582	43946536	rs2316773	0.96339	rs7207582	T	C	0.00607753	4.48332	7.349e-06	-4.87106	1.11e-06	MAPT-AS1	0	ncRNA_intronic	3.6	7	5	14	0	1	0
17	17	44210933	rs7207582	43946642	rs2316774	0.96339	rs7207582	C	T	0.00608134	4.48315	7.355e-06	-4.87231	1.103e-06	MAPT-AS1	0	ncRNA_intronic	8.704	6	5	14	0	1	0
17	17	44210933	rs7207582	43946707	rs739643	0.96339	rs7207582	C	T	0.00589304	4.49175	7.064e-06	-4.88072	1.057e-06	MAPT-AS1	0	ncRNA_intronic	3.285		5	14	0	1	0
17	17	44210933	rs7207582	43946838	rs739642	0.96339	rs7207582	A	C	0.00607753	4.48332	7.349e-06	-4.82078	1.43e-06	MAPT-AS1	0	ncRNA_intronic	8.707		5	14	0	1	0
17	17	44210933	rs7207582	43946875	rs757055	0.96339	rs7207582	T	C	0.00607753	4.48332	7.349e-06	-4.87178	1.106e-06	MAPT-AS1	0	ncRNA_intronic	2.235		5	14	0	1	0
17	17	44210933	rs7207582	43947488	rs56398500	0.96339	rs7207582	G	A	0.00608134	4.48315	7.355e-06	-4.8016	1.574e-06	MAPT-AS1	0	ncRNA_intronic	2.817	4	5	14	0	1	0
17	17	44210933	rs7207582	43947928	rs56289364	0.96339	rs7207582	G	A	0.00608134	4.48315	7.355e-06	-4.87776	1.073e-06	MAPT-AS1	0	ncRNA_intronic	5.097	5	5	14	0	1	0
17	17	44210933	rs7207582	43948040	rs62055483	0.96339	rs7207582	T	C	0.00611357	4.48167	7.406e-06	-4.88639	1.027e-06	MAPT-AS1	0	ncRNA_intronic	1.657	5	5	14	0	1	0
17	17	44210933	rs7207582	43948159	rs78238042	0.96339	rs7207582	A	G	0.00607753	4.48332	7.349e-06	-4.88716	1.023e-06	MAPT-AS1	0	ncRNA_intronic	16.3	5	5	14	0	1	0
17	17	44210933	rs7207582	43948733	rs55673340	0.96339	rs7207582	T	C	0.00607753	4.48332	7.349e-06	-4.85318	1.215e-06	MAPT-AS1	0	ncRNA_intronic	2.74	7	5	14	0	1	0
17	17	44210933	rs7207582	43949092	rs62055486	0.96339	rs7207582	G	T	0.00608134	4.48315	7.355e-06	-4.87776	1.073e-06	MAPT-AS1	0	ncRNA_intronic	4.201	7	5	14	0	1	0
17	17	44210933	rs7207582	43949342	rs34739559	0.952737	rs7207582	A	G	0.0069213	4.4499	8.591e-06	-4.77311	1.814e-06	MAPT-AS1	0	ncRNA_intronic	1.756	5	5	14	0	1	0
17	17	44210933	rs7207582	43949448	rs34097347	0.96339	rs7207582	A	C	0.00441912	4.56454	5.006e-06	-4.75689	1.966e-06	MAPT-AS1	0	ncRNA_intronic	0.281	1f	5	14	0	1	0
17	17	44210933	rs7207582	43949892	rs2106784	0.96339	rs7207582	T	C	0.00620772	4.47736	7.557e-06	-4.95409	7.267e-07	MAPT-AS1	0	ncRNA_intronic	5.172		5	14	0	1	0
17	17	44210933	rs7207582	43950195	rs2158072	0.96339	rs7207582	C	T	0.00620525	4.47748	7.553e-06	-4.92733	8.336e-07	MAPT-AS1	0	ncRNA_intronic	4.343		5	14	0	1	0
17	17	44210933	rs7207582	43950394	rs62055488	0.96339	rs7207582	T	C	0.00620772	4.47736	7.557e-06	-4.86841	1.125e-06	MAPT-AS1	0	ncRNA_intronic	1.629	7	5	14	0	1	0
17	17	44210933	rs7207582	43950533	rs62055490	0.96339	rs7207582	G	A	0.00620525	4.47748	7.553e-06	-4.77919	1.76e-06	MAPT-AS1	0	ncRNA_intronic	1.143	7	5	14	0	1	0
17	17	44210933	rs7207582	43951120	rs62055491	0.96339	rs7207582	C	T	0.00620525	4.47748	7.553e-06	-4.85763	1.188e-06	MAPT-AS1	0	ncRNA_intronic	6.157	4	2	14	0	1	0
17	17	44210933	rs7207582	43951220	rs34416056	0.96339	rs7207582	G	T	0.00620525	4.47748	7.553e-06	-4.86649	1.136e-06	MAPT-AS1	0	ncRNA_intronic	4.731	2b	2	14	0	1	0
17	17	44210933	rs7207582	43951345	rs62055492	0.96339	rs7207582	A	C	0.00620772	4.47736	7.557e-06	-4.82917	1.371e-06	MAPT-AS1	0	ncRNA_intronic	3.497	4	2	14	0	1	0
17	17	44210933	rs7207582	43951717	rs2055794	0.96339	rs7207582	A	G	0.00624655	4.47587	7.61e-06	-4.96517	6.864e-07	MAPT-AS1	0	ncRNA_intronic	0.506	1f	7	14	0	1	0
17	17	44210933	rs7207582	43951995	rs2055795	0.96339	rs7207582	T	C	0.00624655	4.47587	7.61e-06	-4.82961	1.368e-06	MAPT-AS1	0	ncRNA_intronic	2.517	7	7	14	0	1	0
17	17	44210933	rs7207582	43952944	rs62055493	0.958195	rs7207582	C	T	0.00610096	4.48225	7.386e-06	-4.86252	1.159e-06	MAPT-AS1	0	ncRNA_intronic	3.381	7	13	14	0	1	0
17	17	44210933	rs7207582	43953016	rs62055494	0.958195	rs7207582	T	C	0.00606037	4.48411	7.322e-06	-4.83181	1.353e-06	MAPT-AS1	0	ncRNA_intronic	2.319	7	13	14	0	1	0
17	17	44210933	rs7207582	43953043	rs62055495	0.958195	rs7207582	C	A	0.00610096	4.48225	7.386e-06	-4.87035	1.114e-06	MAPT-AS1	0	ncRNA_intronic	0.65	7	13	14	0	1	0
17	17	44210933	rs7207582	43953307	rs62055496	0.96339	rs7207582	T	C	0.0062888	4.47425	7.668e-06	-4.84723	1.252e-06	MAPT-AS1	0	ncRNA_intronic	0.425	6	13	14	0	1	0
17	17	44210933	rs7207582	43953529	rs62055497	0.96339	rs7207582	G	A	0.00624582	4.4759	7.609e-06	-4.8212	1.427e-06	MAPT-AS1	0	ncRNA_intronic	1.846	6	13	14	0	1	0
17	17	44210933	rs7207582	43953695	rs2188888	0.96339	rs7207582	C	T	0.00629243	4.47411	7.673e-06	-4.76051	1.931e-06	MAPT-AS1	0	ncRNA_intronic	1.515		7	14	0	1	0
17	17	44210933	rs7207582	43953707	rs3919455	0.96339	rs7207582	T	C	0.0062888	4.47425	7.668e-06	-4.75525	1.982e-06	MAPT-AS1	0	ncRNA_intronic	0.899		7	14	0	1	0
17	17	44210933	rs7207582	43953814	rs62055498	0.96339	rs7207582	A	G	0.0062888	4.47425	7.668e-06	-4.87684	1.078e-06	MAPT-AS1	0	ncRNA_intronic	9.124	6	7	14	0	1	0
17	17	44210933	rs7207582	43954134	rs62055500	0.96339	rs7207582	A	G	0.0062888	4.47425	7.668e-06	-4.87739	1.075e-06	MAPT-AS1	0	ncRNA_intronic	16.63	5	2	14	0	1	0
17	17	44210933	rs7207582	43954227	rs62055501	0.96339	rs7207582	A	G	0.00633146	4.47261	7.727e-06	-4.86389	1.151e-06	MAPT-AS1	0	ncRNA_intronic	5.352	5	2	14	0	1	0
17	17	44210933	rs7207582	43954284	rs62055502	0.96339	rs7207582	A	G	0.00633146	4.47261	7.727e-06	-4.87739	1.075e-06	MAPT-AS1	0	ncRNA_intronic	3.377	7	2	14	0	1	0
17	17	44210933	rs7207582	43954686	rs916793	0.96339	rs7207582	A	G	0.00577806	4.497	6.892e-06	-4.93277	8.107e-07	MAPT-AS1	0	ncRNA_intronic	12.16	1f	9	14	0	1	0
17	17	44210933	rs7207582	43955030	rs4441322	0.96339	rs7207582	G	A	0.00613557	4.48067	7.441e-06	-4.9993	5.754e-07	MAPT-AS1	0	ncRNA_intronic	6.719	1f	9	14	0	1	0
17	17	44210933	rs7207582	43955093	rs113414067	0.96339	rs7207582	C	T	0.00633362	4.47253	7.73e-06	-4.88297	1.045e-06	MAPT-AS1	0	ncRNA_intronic	3.434	5	9	14	0	1	0
17	17	44210933	rs7207582	43955365	rs55905252	0.96339	rs7207582	A	C	0.00624655	4.47587	7.61e-06	-4.8593	1.178e-06	MAPT-AS1	0	ncRNA_intronic	1.415	5	9	14	0	1	0
17	17	44210933	rs7207582	43955487	rs17691328	0.9529	rs7207582	T	C	0.00832637	4.4001	1.082e-05	-5.0209	5.143e-07	MAPT-AS1	0	ncRNA_intronic	2.284	1f	9	14	0	1	0
17	17	44210933	rs7207582	43956370	rs62055515	0.96339	rs7207582	T	G	0.00592528	4.49028	7.113e-06	-4.90253	9.461e-07	MAPT-AS1	0	ncRNA_intronic	1.206	5	14	14	0	1	0
17	17	44210933	rs7207582	43956390	rs62055516	0.96339	rs7207582	C	T	0.00592791	4.49016	7.117e-06	-4.89241	9.961e-07	MAPT-AS1	0	ncRNA_intronic	2.442	7	14	14	0	1	0
17	17	44210933	rs7207582	43956425	rs62055517	0.96339	rs7207582	T	C	0.00592528	4.49028	7.113e-06	-4.89164	1e-06	MAPT-AS1	0	ncRNA_intronic	2.94	6	14	14	0	1	0
17	17	44210933	rs7207582	43956505	rs62055518	0.96339	rs7207582	C	A	0.00624582	4.4759	7.609e-06	-4.86338	1.154e-06	MAPT-AS1	0	ncRNA_intronic	2.271	7	14	14	0	1	0
17	17	44210933	rs7207582	43956642	rs56364632	0.96339	rs7207582	C	T	0.0063523	4.47181	7.756e-06	-4.81732	1.455e-06	MAPT-AS1	0	ncRNA_intronic	2.671	7	14	14	0	1	0
17	17	44210933	rs7207582	43956734	rs55768605	0.96339	rs7207582	A	C	0.00614621	4.48018	7.458e-06	-4.85913	1.179e-06	MAPT-AS1	0	ncRNA_intronic	0.091	7	14	14	0	1	0
17	17	44210933	rs7207582	43956778	rs55653657	0.96339	rs7207582	G	A	0.0063523	4.47181	7.756e-06	-4.87502	1.088e-06	MAPT-AS1	0	ncRNA_intronic	2.729	7	14	14	0	1	0
17	17	44210933	rs7207582	43957221	rs55894109	0.96339	rs7207582	T	C	0.00635804	4.47159	7.764e-06	-4.82557	1.396e-06	MAPT-AS1	0	ncRNA_intronic	0.31	7	14	14	0	1	0
17	17	44210933	rs7207582	43957269	rs56101773	0.96339	rs7207582	C	T	0.0063523	4.47181	7.756e-06	-4.86321	1.155e-06	MAPT-AS1	0	ncRNA_intronic	0.401	7	14	14	0	1	0
17	17	44210933	rs7207582	43957328	rs56249780	0.96339	rs7207582	T	C	0.00635804	4.47159	7.764e-06	-4.87321	1.098e-06	MAPT-AS1	0	ncRNA_intronic	1.519	7	14	14	0	1	0
17	17	44210933	rs7207582	43958079	rs56040418	0.958195	rs7207582	T	C	0.00819703	4.40435	1.061e-05	-4.86116	1.167e-06	MAPT-AS1	0	ncRNA_intronic	4.194	7	9	14	0	1	0
17	17	44210933	rs7207582	43958099	rs55721252	0.96339	rs7207582	C	T	0.0063523	4.47181	7.756e-06	-4.89318	9.922e-07	MAPT-AS1	0	ncRNA_intronic	4.424	7	9	14	0	1	0
17	17	44210933	rs7207582	43958139	rs55876817	0.96339	rs7207582	C	A	0.0063523	4.47181	7.756e-06	-4.89864	9.65e-07	MAPT-AS1	0	ncRNA_intronic	7.877	7	9	14	0	1	0
17	17	44210933	rs7207582	43958172	rs55944735	0.96339	rs7207582	G	A	0.00656418	4.46366	8.057e-06	-4.90104	9.533e-07	MAPT-AS1	0	ncRNA_intronic	0.388	7	9	14	0	1	0
17	17	44210933	rs7207582	43958736	rs62055525	0.96339	rs7207582	A	G	0.00640088	4.46994	7.824e-06	-4.83597	1.325e-06	MAPT-AS1	0	ncRNA_intronic	4.284	7	9	14	0	1	0
17	17	44210933	rs7207582	43958744	rs112915466	0.96339	rs7207582	G	A	0.00639803	4.47005	7.82e-06	-4.80675	1.534e-06	MAPT-AS1	0	ncRNA_intronic	3.013	6	9	14	0	1	0
17	17	44210933	rs7207582	43959092	rs56343551	0.96339	rs7207582	T	G	0.00640088	4.46994	7.824e-06	-4.76325	1.905e-06	MAPT-AS1	0	ncRNA_intronic	8.17	7	9	14	0	1	0
17	17	44210933	rs7207582	43959113	rs55975673	0.96339	rs7207582	G	A	0.00639803	4.47005	7.82e-06	-4.81486	1.473e-06	MAPT-AS1	0	ncRNA_intronic	5.104	5	9	14	0	1	0
17	17	44210933	rs7207582	43959261	rs56387391	0.96339	rs7207582	A	G	0.00640088	4.46994	7.824e-06	-4.85863	1.182e-06	MAPT-AS1	0	ncRNA_intronic	5.484	7	9	14	0	1	0
17	17	44210933	rs7207582	43959661	rs2019816	0.96339	rs7207582	A	G	0.00640088	4.46994	7.824e-06	-4.80403	1.555e-06	MAPT-AS1	0	ncRNA_intronic	0.262		9	14	0	1	0
17	17	44210933	rs7207582	43960020	rs62055529	0.96339	rs7207582	G	A	0.00639803	4.47005	7.82e-06	-4.8558	1.199e-06	MAPT-AS1	0	ncRNA_intronic	4.082	6	7	14	0	1	1
17	17	44210933	rs7207582	43960172	rs79580365	0.96339	rs7207582	T	C	0.00644339	4.46831	7.884e-06	-4.85432	1.208e-06	MAPT-AS1	0	ncRNA_intronic	7.912		7	14	0	1	1
17	17	44210933	rs7207582	43960283	rs55937610	0.96339	rs7207582	G	A	0.00643986	4.46845	7.879e-06	-4.85187	1.223e-06	MAPT-AS1	0	ncRNA_intronic	0.594	5	7	14	0	1	1
17	17	44210933	rs7207582	43960323	rs56365901	0.96339	rs7207582	G	A	0.00643986	4.46845	7.879e-06	-4.58403	4.561e-06	MAPT-AS1	0	ncRNA_intronic	5.8	5	7	14	0	1	1
17	17	44210933	rs7207582	43960325	rs55767267	0.96339	rs7207582	C	T	0.00643986	4.46845	7.879e-06	-4.66243	3.125e-06	MAPT-AS1	0	ncRNA_intronic	5.792	5	7	14	0	1	1
17	17	44210933	rs7207582	43960341	rs56127309	0.958195	rs7207582	A	G	0.00621943	4.47691	7.573e-06	-4.66481	3.089e-06	MAPT-AS1	0	ncRNA_intronic	7.6	5	7	14	0	1	1
17	17	44210933	rs7207582	43960600	rs56194412	0.96339	rs7207582	C	T	0.00643986	4.46845	7.879e-06	-4.8568	1.193e-06	MAPT-AS1	0	ncRNA_intronic	15.7	5	7	14	0	1	1
17	17	44210933	rs7207582	43960911	rs56180212	0.958195	rs7207582	G	A	0.00790454	4.41395	1.015e-05	-4.8593	1.178e-06	MAPT-AS1	0	ncRNA_intronic	4.09	5	7	14	0	1	1
17	17	44210933	rs7207582	43960918	rs56301449	0.96339	rs7207582	C	T	0.00643986	4.46845	7.879e-06	-4.82961	1.368e-06	MAPT-AS1	0	ncRNA_intronic	3.772	5	7	14	0	1	1
17	17	44210933	rs7207582	43960997	rs62055538	0.96339	rs7207582	C	T	0.00643986	4.46845	7.879e-06	-4.85796	1.186e-06	MAPT-AS1	0	ncRNA_intronic	0.686	5	7	14	0	1	1
17	17	44210933	rs7207582	43961044	rs62055539	0.96339	rs7207582	G	A	0.00643986	4.46845	7.879e-06	-4.86303	1.156e-06	MAPT-AS1	0	ncRNA_intronic	10.28	5	7	14	0	1	1
17	17	44210933	rs7207582	43961142	rs62055540	0.96339	rs7207582	C	T	0.00643986	4.46845	7.879e-06	-4.87053	1.113e-06	MAPT-AS1	0	ncRNA_intronic	9.975	5	7	14	0	1	1
17	17	44210933	rs7207582	43961292	rs17770108	0.96339	rs7207582	T	G	0.00644339	4.46831	7.884e-06	-5.0186	5.205e-07	MAPT-AS1	0	ncRNA_intronic	2.839	6	7	14	0	1	1
17	17	44210933	rs7207582	43962982	rs77426526	0.96339	rs7207582	A	G	0.00659792	4.46236	8.106e-06	-4.86859	1.124e-06	MAPT-AS1	0	ncRNA_intronic	5.162	5	9	14	1	1	1
17	17	44210933	rs7207582	43963046	rs77129180	0.96339	rs7207582	A	G	0.00659792	4.46236	8.106e-06	-4.85796	1.186e-06	MAPT-AS1	0	ncRNA_intronic	1.873	5	9	14	1	1	1
17	17	44210933	rs7207582	43963120	rs74863825	0.96339	rs7207582	T	C	0.00659792	4.46236	8.106e-06	-4.81378	1.481e-06	MAPT-AS1	0	ncRNA_intronic	4.589	5	9	14	1	1	1
17	17	44210933	rs7207582	43963844	rs62055542	0.96339	rs7207582	T	C	0.00664033	4.46073	8.168e-06	-4.83005	1.365e-06	MAPT-AS1	0	ncRNA_intronic	0.93	4	14	14	1	1	1
17	17	44210933	rs7207582	43963943	rs17770120	0.96339	rs7207582	A	C	0.00664033	4.46073	8.168e-06	-4.98463	6.208e-07	MAPT-AS1	0	ncRNA_intronic	13.33	6	14	14	1	1	1
17	17	44210933	rs7207582	43964163	rs17770150	0.96339	rs7207582	A	G	0.00682658	4.45356	8.446e-06	-4.96175	6.986e-07	MAPT-AS1	0	ncRNA_intronic	3.117	1f	14	14	1	1	1
17	17	44210933	rs7207582	43964191	rs17770186	0.96339	rs7207582	A	C	0.00664033	4.46073	8.168e-06	-4.97532	6.514e-07	MAPT-AS1	0	ncRNA_intronic	2.874	1f	14	14	1	1	1
17	17	44210933	rs7207582	43964539	rs62055544	0.958005	rs7207582	G	A	0.00673284	4.47439	7.663e-06	-4.5386	5.663e-06	MAPT-AS1	0	ncRNA_intronic	4.051	6	14	14	1	1	1
17	17	44210933	rs7207582	43964561	rs62055545	0.96339	rs7207582	T	C	0.00791926	4.46669	7.944e-06	-4.48434	7.314e-06	MAPT-AS1	0	ncRNA_intronic	3.794	6	14	14	1	1	1
17	17	44210933	rs7207582	43964567	rs62055546	0.96339	rs7207582	C	A	0.00648138	4.46685	7.938e-06	-4.58107	4.626e-06	MAPT-AS1	0	ncRNA_intronic	1.334	6	14	14	1	1	1
17	17	44210933	rs7207582	43964755	rs62055547	0.96339	rs7207582	T	C	0.00664033	4.46073	8.168e-06	-4.8568	1.193e-06	MAPT-AS1	0	ncRNA_intronic	1.178	7	14	14	1	1	1
17	17	44210933	rs7207582	43964899	rs62055548	0.96339	rs7207582	G	A	0.00664033	4.46073	8.168e-06	-4.83034	1.363e-06	MAPT-AS1	0	ncRNA_intronic	3.995	6	14	14	1	1	1
17	17	44210933	rs7207582	43965063	rs113327263	0.96339	rs7207582	C	T	0.00664033	4.46073	8.168e-06	-4.84549	1.263e-06	MAPT-AS1	0	ncRNA_intronic	0.944	7	14	14	1	1	1
17	17	44210933	rs7207582	43965680	rs62055550	0.96339	rs7207582	A	G	0.00664033	4.46073	8.168e-06	-4.87071	1.112e-06	MAPT-AS1	0	ncRNA_intronic	11.65	6	13	14	1	1	1
17	17	44210933	rs7207582	43965955	rs62055552	0.96339	rs7207582	G	A	0.00668173	4.45914	8.229e-06	-4.84377	1.274e-06	MAPT-AS1	0	ncRNA_intronic	0.769	5	13	14	1	1	1
17	17	44210933	rs7207582	43966178	rs62055553	0.96339	rs7207582	A	C	0.00668241	4.45911	8.23e-06	-4.82715	1.385e-06	MAPT-AS1	0	ncRNA_intronic	7.871	7	13	14	1	1	1
17	17	44210933	rs7207582	43966260	rs62055554	0.96339	rs7207582	G	A	0.00668173	4.45914	8.229e-06	-4.84723	1.252e-06	MAPT-AS1	0	ncRNA_intronic	7.444	7	13	14	1	1	1
17	17	44210933	rs7207582	43966282	rs62055555	0.96339	rs7207582	T	G	0.00668241	4.45911	8.23e-06	-4.84786	1.248e-06	MAPT-AS1	0	ncRNA_intronic	1.931		13	14	1	1	1
17	17	44210933	rs7207582	43966749	rs62055556	0.96339	rs7207582	C	T	0.00668173	4.45914	8.229e-06	-4.85863	1.182e-06	MAPT-AS1	0	ncRNA_intronic	3.47	7	13	14	1	1	1
17	17	44210933	rs7207582	43966795	rs62055557	0.96339	rs7207582	A	C	0.00668241	4.45911	8.23e-06	-4.85746	1.189e-06	MAPT-AS1	0	ncRNA_intronic	2.257	6	13	14	1	1	1
17	17	44210933	rs7207582	43966955	rs62055558	0.96339	rs7207582	G	A	0.00668173	4.45914	8.229e-06	-4.84898	1.241e-06	MAPT-AS1	0	ncRNA_intronic	10.15	2b	13	14	1	1	1
17	17	44210933	rs7207582	43967138	rs62055559	0.96339	rs7207582	G	T	0.00655727	4.46393	8.047e-06	-4.86167	1.164e-06	MAPT-AS1	0	ncRNA_intronic	12.86	2b	5	14	1	1	1
17	17	44210933	rs7207582	43967562	rs79193046	0.96339	rs7207582	C	T	0.00624582	4.4759	7.609e-06	-4.8433	1.277e-06	MAPT-AS1	0	ncRNA_intronic	2.464	6	5	14	1	1	1
17	17	44210933	rs7207582	43968219	rs17691466	0.96339	rs7207582	G	A	0.00668173	4.45914	8.229e-06	-4.99122	6e-07	MAPT-AS1	0	ncRNA_intronic	4.578	6	5	14	1	1	1
17	17	44210933	rs7207582	43968572	rs62056760	0.96339	rs7207582	A	G	0.00668241	4.45911	8.23e-06	-4.84659	1.256e-06	MAPT-AS1	0	ncRNA_intronic	5.099	7	5	14	1	1	1
17	17	44210933	rs7207582	43968874	rs55943606	0.96339	rs7207582	G	A	0.00668173	4.45914	8.229e-06	-4.85139	1.226e-06	MAPT-AS1	0	ncRNA_intronic	2.462	6	5	14	1	1	1
17	17	44210933	rs7207582	43968937	rs55895732	0.96339	rs7207582	C	T	0.00668173	4.45914	8.229e-06	-4.85432	1.208e-06	MAPT-AS1	0	ncRNA_intronic	2.746	7	5	14	1	1	1
17	17	44210933	rs7207582	43968994	rs55960528	0.96339	rs7207582	C	T	0.00668173	4.45914	8.229e-06	-4.80623	1.538e-06	MAPT-AS1	0	ncRNA_intronic	4.601	7	5	14	1	1	1
17	17	44210933	rs7207582	43969019	rs55877243	0.96339	rs7207582	C	T	0.00668173	4.45914	8.229e-06	-4.81897	1.443e-06	MAPT-AS1	0	ncRNA_intronic	5.878	7	5	14	1	1	1
17	17	44210933	rs7207582	43969136	rs17770296	0.96339	rs7207582	T	C	0.00809676	4.40765	1.045e-05	-4.97672	6.467e-07	MAPT-AS1	0	ncRNA_intronic	1.453	1f	5	14	1	1	1
17	17	44210933	rs7207582	43969779	rs17770337	0.96339	rs7207582	T	G	0.00664033	4.46073	8.168e-06	-4.90924	9.143e-07	MAPT-AS1	0	ncRNA_intronic	1.512	6	5	14	1	1	1
17	17	44210933	rs7207582	43969833	rs62056773	0.96339	rs7207582	G	A	0.00664033	4.46073	8.168e-06	-4.80872	1.519e-06	MAPT-AS1	0	ncRNA_intronic	4.145	6	5	14	1	1	1
17	17	44210933	rs7207582	43969901	rs62056774	0.96339	rs7207582	A	G	0.00664033	4.46073	8.168e-06	-4.79046	1.664e-06	MAPT-AS1	0	ncRNA_intronic	3.374	7	5	14	1	1	1
17	17	44210933	rs7207582	43969952	rs62056775	0.96339	rs7207582	C	T	0.00664033	4.46073	8.168e-06	-4.81271	1.489e-06	MAPT-AS1	0	ncRNA_intronic	4.478	7	5	14	1	1	1
17	17	44210933	rs7207582	43969995	rs62056776	0.96339	rs7207582	T	C	0.00664033	4.46073	8.168e-06	-4.80301	1.563e-06	MAPT-AS1	0	ncRNA_intronic	2.208	6	5	14	1	1	1
17	17	44210933	rs7207582	43970108	rs78729125	0.96339	rs7207582	A	C	0.00664033	4.46073	8.168e-06	-4.84206	1.285e-06	MAPT-AS1	0	ncRNA_intronic	1.154	6	5	14	1	1	0
17	17	44210933	rs7207582	43970154	rs17770343	0.96339	rs7207582	C	T	0.00664033	4.46073	8.168e-06	-4.93515	8.009e-07	MAPT-AS1	0	ncRNA_intronic	11.08	6	5	14	1	1	0
17	17	44210933	rs7207582	43970303	rs62056777	0.96339	rs7207582	A	G	0.00674159	4.45683	8.318e-06	-4.8025	1.567e-06	MAPT-AS1	0	ncRNA_intronic	10.94	6	5	14	1	1	0
17	17	44210933	rs7207582	43970662	rs17691610	0.96339	rs7207582	T	G	0.00716217	4.4406	8.971e-06	-4.94616	7.569e-07	MAPT-AS1	0	ncRNA_intronic	1.819	1f	5	14	1	1	0
17	17	44210933	rs7207582	43971481	rs80233201	0.96339	rs7207582	C	T	0.00670468	4.45825	8.263e-06	-4.83732	1.316e-06	MAPT-AS1	0	ncRNA_intronic	8.708	4	1	1	1	1	0
17	17	44210933	rs7207582	43971785	rs11575895	0.96339	rs7207582	G	A	0.00670468	4.45825	8.263e-06	-4.81084	1.503e-06	MAPT-AS1:MAPT	0:0	ncRNA_intronic	16.48	2a	1	1	1	1	0
17	17	44210933	rs7207582	43971937	rs62056779	0.96339	rs7207582	A	C	0.00669929	4.45846	8.255e-06	-4.83914	1.304e-06	MAPT-AS1:MAPT	0:0	ncRNA_intronic	16.3	2b	1	1	1	1	0
17	17	44210933	rs7207582	43972142	rs11575896	0.96339	rs7207582	A	G	0.00669929	4.45846	8.255e-06	-4.83195	1.352e-06	MAPT-AS1:MAPT	0:0	ncRNA_exonic	11.69	4	1	1	1	1	0
17	17	44210933	rs7207582	43972581	rs74457229	0.96339	rs7207582	T	C	0.00669929	4.45846	8.255e-06	-4.83582	1.326e-06	MAPT-AS1:MAPT	0:0	ncRNA_exonic	13.39	4	1	11	1	1	0
17	17	44210933	rs7207582	43973080	rs74548327	0.96339	rs7207582	G	A	0.00697609	4.44779	8.676e-06	-4.85465	1.206e-06	MAPT	0	intronic	20.3	4	1	11	1	1	0
17	17	44210933	rs7207582	43973233	rs76324150	0.96339	rs7207582	T	C	0.00669929	4.45846	8.255e-06	-4.85074	1.23e-06	MAPT	0	intronic	13.66	2b	1	11	1	1	0
17	17	44210933	rs7207582	43973408	rs113347741	0.96339	rs7207582	T	C	0.00669929	4.45846	8.255e-06	-4.84486	1.267e-06	MAPT	0	intronic	10.18	4	1	11	1	1	0
17	17	44210933	rs7207582	43973413	rs78720789	0.96339	rs7207582	G	A	0.00670468	4.45825	8.263e-06	-4.83717	1.317e-06	MAPT	0	intronic	6.162	3a	1	11	1	1	0
17	17	44210933	rs7207582	43973652	rs62056780	0.96339	rs7207582	T	C	0.00669929	4.45846	8.255e-06	-4.8119	1.495e-06	MAPT	0	intronic	9.924	3a	1	13	1	1	0
17	17	44210933	rs7207582	43973899	rs62056781	0.96339	rs7207582	C	T	0.00670468	4.45825	8.263e-06	-4.85465	1.206e-06	MAPT	0	intronic	9.122	2b	1	13	1	1	0
17	17	44210933	rs7207582	43974065	rs74496580	0.96339	rs7207582	A	C	0.00669929	4.45846	8.255e-06	-4.85964	1.176e-06	MAPT	0	intronic	7.415	5	1	13	1	1	0
17	17	44210933	rs7207582	43974230	rs62056782	0.96339	rs7207582	T	C	0.00669929	4.45846	8.255e-06	-4.79448	1.631e-06	MAPT	0	intronic	8.48	4	1	13	1	1	0
17	17	44210933	rs7207582	43974476	rs80346216	0.958195	rs7207582	T	G	0.00710794	4.44269	8.884e-06	-4.8522	1.221e-06	MAPT	0	intronic	10.2		1	13	1	1	0
17	17	44210933	rs7207582	43975263	rs62056785	0.96339	rs7207582	C	T	0.00649258	4.46642	7.954e-06	-4.84021	1.297e-06	MAPT	0	intronic	10.38	2b	1	13	1	1	0
17	17	44210933	rs7207582	43975285	rs62056786	0.96339	rs7207582	C	T	0.00649258	4.46642	7.954e-06	-4.84898	1.241e-06	MAPT	0	intronic	11.85	2b	1	13	1	1	0
17	17	44210933	rs7207582	43975415	rs62056789	0.96339	rs7207582	C	A	0.00649258	4.46642	7.954e-06	-4.83975	1.3e-06	MAPT	0	intronic	4.374	2b	2	13	1	1	0
17	17	44210933	rs7207582	43975417	rs62056790	0.96339	rs7207582	A	G	0.00649048	4.4665	7.951e-06	-4.83687	1.319e-06	MAPT	0	intronic	6.993	2b	2	13	1	1	0
17	17	44210933	rs7207582	43976064	rs62056791	0.96339	rs7207582	C	T	0.00636735	4.47123	7.777e-06	-4.83034	1.363e-06	MAPT	0	intronic	3.128	5	5	13	1	1	0
17	17	44210933	rs7207582	43976627	rs77561671	0.96339	rs7207582	T	G	0.00632064	4.47303	7.712e-06	-4.84914	1.24e-06	MAPT	0	intronic	5.968	5	5	13	1	1	0
17	17	44210933	rs7207582	43976644	rs62056792	0.96339	rs7207582	A	G	0.00632064	4.47303	7.712e-06	-4.8485	1.244e-06	MAPT	0	intronic	11.16	5	5	13	1	1	0
17	17	44210933	rs7207582	43977018	rs62056793	0.96339	rs7207582	G	A	0.00628009	4.47458	7.656e-06	-4.81939	1.44e-06	MAPT	0	intronic	7.979	4	5	13	1	1	0
17	17	44210933	rs7207582	43977049	rs62056794	0.96339	rs7207582	G	A	0.00609338	4.4826	7.374e-06	-4.83991	1.299e-06	MAPT	0	intronic	3.273	4	5	13	1	1	0
17	17	44210933	rs7207582	43977702	rs1864324	0.96339	rs7207582	T	C	0.00627791	4.47467	7.653e-06	-4.87429	1.092e-06	MAPT	0	intronic	8.354	5	5	13	1	1	0
17	17	44210933	rs7207582	43977827	rs1864325	0.96339	rs7207582	T	C	0.00737336	4.43242	9.318e-06	-4.9504	7.406e-07	MAPT	0	intronic	4.16	1f	5	13	1	1	0
17	17	44210933	rs7207582	43978041	rs62056795	0.96339	rs7207582	T	C	0.00627791	4.47467	7.653e-06	-4.85026	1.233e-06	MAPT	0	intronic	9.474	5	2	13	1	1	0
17	17	44210933	rs7207582	43978120	rs62056796	0.96339	rs7207582	G	A	0.00628009	4.47458	7.656e-06	-4.8578	1.187e-06	MAPT	0	intronic	5.516	5	2	13	1	1	0
17	17	44210933	rs7207582	43978320	rs55823844	0.96339	rs7207582	A	G	0.00627791	4.47467	7.653e-06	-4.81911	1.442e-06	MAPT	0	intronic	0.562	4	5	13	1	1	0
17	17	44210933	rs7207582	43978534	rs1560310	0.96339	rs7207582	A	G	0.00619412	4.47799	7.535e-06	-4.95987	7.054e-07	MAPT	0	intronic	0.562	1f	2	14	1	1	0
17	17	44210933	rs7207582	43978604	rs1467962	0.96339	rs7207582	G	A	0.00632641	4.47281	7.72e-06	-4.84346	1.276e-06	MAPT	0	intronic	4.555	2b	5	14	1	1	0
17	17	44210933	rs7207582	43978625	rs1560311	0.96339	rs7207582	C	T	0.00632641	4.47281	7.72e-06	-4.83078	1.36e-06	MAPT	0	intronic	0.849	4	5	14	1	1	0
17	17	44210933	rs7207582	43978934	rs1467963	0.96339	rs7207582	G	T	0.00632641	4.47281	7.72e-06	-4.86859	1.124e-06	MAPT	0	intronic	9.557	5	5	14	1	1	0
17	17	44210933	rs7207582	43979504	rs62056801	0.96339	rs7207582	A	G	0.00643279	4.46872	7.869e-06	-4.84299	1.279e-06	MAPT	0	intronic	1.184	6	5	14	1	1	0
17	17	44210933	rs7207582	43979622	rs113834264	0.96339	rs7207582	A	G	0.00643279	4.46872	7.869e-06	-4.82802	1.379e-06	MAPT	0	intronic	1.134	7	5	14	1	1	0
17	17	44210933	rs7207582	43979971	rs2082068	0.96339	rs7207582	T	C	0.00706518	4.44435	8.816e-06	-4.94642	7.559e-07	MAPT	0	intronic	1.433	6	5	14	1	1	0
17	17	44210933	rs7207582	43980530	rs1984937	0.96339	rs7207582	C	A	0.00643209	4.46874	7.868e-06	-4.95735	7.146e-07	MAPT	0	intronic	8.638		2	14	1	1	0
17	17	44210933	rs7207582	43980762	rs62056802	0.96339	rs7207582	G	A	0.00643209	4.46874	7.868e-06	-4.8573	1.19e-06	MAPT	0	intronic	9.749	5	2	14	1	1	0
17	17	44210933	rs7207582	43981795	rs113589236	0.96339	rs7207582	A	G	0.00643279	4.46872	7.869e-06	-4.85531	1.202e-06	MAPT	0	intronic	0.067	7	5	14	1	1	0
17	17	44210933	rs7207582	43981958	rs112275277	0.96339	rs7207582	T	C	0.00643138	4.46877	7.867e-06	-4.82845	1.376e-06	MAPT	0	intronic	1.534	6	5	14	1	1	0
17	17	44210933	rs7207582	43982159	rs62056803	0.96339	rs7207582	G	A	0.00643209	4.46874	7.868e-06	-4.84898	1.241e-06	MAPT	0	intronic	3.817	7	5	14	1	1	0
17	17	44210933	rs7207582	43982286	rs62056804	0.96339	rs7207582	T	C	0.00643279	4.46872	7.869e-06	-4.85074	1.23e-06	MAPT	0	intronic	1.171	5	5	14	1	1	0
17	17	44210933	rs7207582	43982903	rs77084869	0.96339	rs7207582	G	A	0.00647366	4.46715	7.927e-06	-4.87303	1.099e-06	MAPT	0	intronic	2.411	6	5	14	1	1	0
17	17	44210933	rs7207582	43982961	rs74573628	0.96339	rs7207582	C	T	0.00647366	4.46715	7.927e-06	-4.82022	1.434e-06	MAPT	0	intronic	11.25	5	5	14	1	1	0
17	17	44210933	rs7207582	43983159	rs75617973	0.96339	rs7207582	C	T	0.00647366	4.46715	7.927e-06	-4.85399	1.21e-06	MAPT	0	intronic	2.262	5	5	14	1	1	0
17	17	44210933	rs7207582	43983363	rs62056805	0.96339	rs7207582	A	G	0.00647506	4.46709	7.929e-06	-4.826	1.393e-06	MAPT	0	intronic	0.444	2b	2	14	1	1	0
17	17	44210933	rs7207582	43983801	rs62056806	0.96339	rs7207582	G	A	0.00647366	4.46715	7.927e-06	-4.86947	1.119e-06	MAPT	0	intronic	4.998	5	2	13	1	1	0
17	17	44210933	rs7207582	43984399	rs1467966	0.96339	rs7207582	T	C	0.00647506	4.46709	7.929e-06	-4.84439	1.27e-06	MAPT	0	intronic	3.864	5	2	14	1	1	0
17	17	44210933	rs7207582	43984646	rs62056808	0.96339	rs7207582	C	T	0.00647366	4.46715	7.927e-06	-4.68214	2.839e-06	MAPT	0	intronic	8.392	5	2	14	1	1	0
17	17	44210933	rs7207582	43984669	rs62056809	0.96339	rs7207582	G	A	0.00647366	4.46715	7.927e-06	-4.79658	1.614e-06	MAPT	0	intronic	5.703	5	2	14	1	1	0
17	17	44210933	rs7207582	43984672	rs62056810	0.96339	rs7207582	C	T	0.00647366	4.46715	7.927e-06	-4.77112	1.832e-06	MAPT	0	intronic	5.629	5	2	14	1	1	0
17	17	44210933	rs7207582	43984864	rs79492906	0.96339	rs7207582	T	C	0.00647506	4.46709	7.929e-06	-4.85465	1.206e-06	MAPT	0	intronic	12.17	5	2	14	1	1	0
17	17	44210933	rs7207582	43985247	rs62056811	0.958005	rs7207582	T	C	0.00650237	4.46604	7.968e-06	-4.83507	1.331e-06	MAPT:RP11-669E14.4	0:0	ncRNA_exonic	6.367	5	2	14	1	1	0
17	17	44210933	rs7207582	43985597	rs74509629	0.96339	rs7207582	T	C	0.00651771	4.46545	7.99e-06	-4.84946	1.238e-06	MAPT:RP11-669E14.4	0:0	ncRNA_exonic	1.158	5	2	14	1	1	0
17	17	44210933	rs7207582	43985662	rs79290980	0.96339	rs7207582	C	T	0.00647366	4.46715	7.927e-06	-4.83137	1.356e-06	MAPT:RP11-669E14.4	0:0	ncRNA_exonic	2.666	5	2	14	1	1	0
17	17	44210933	rs7207582	43986396	rs1467968	0.96339	rs7207582	T	C	0.00658693	4.46279	8.09e-06	-4.77942	1.758e-06	MAPT:RP11-669E14.4	0:0	ncRNA_intronic	2.538	5	2	14	1	1	0
17	17	44210933	rs7207582	43986420	rs4371195	0.96339	rs7207582	G	A	0.00647366	4.46715	7.927e-06	-4.85514	1.203e-06	MAPT:RP11-669E14.4	0:0	ncRNA_intronic	0.094	5	2	14	1	1	0
17	17	44210933	rs7207582	43986432	rs12150125	0.96339	rs7207582	A	G	0.00651771	4.46545	7.99e-06	-4.79958	1.59e-06	MAPT:RP11-669E14.4	0:0	ncRNA_intronic	3.538	5	2	14	1	1	0
17	17	44210933	rs7207582	43986462	rs12150527	0.96339	rs7207582	G	A	0.00647366	4.46715	7.927e-06	-4.9112	9.052e-07	MAPT:RP11-669E14.4	0:0	ncRNA_intronic	9.12	5	2	14	1	1	0
17	17	44210933	rs7207582	43987154	rs62056812	0.96339	rs7207582	A	G	0.00651771	4.46545	7.99e-06	-4.87538	1.086e-06	MAPT:RP11-669E14.4	0:0	ncRNA_intronic	2.139	7	5	14	1	1	0
17	17	44210933	rs7207582	43987184	rs111447859	0.96339	rs7207582	C	T	0.00651493	4.46556	7.986e-06	-4.8321	1.351e-06	MAPT:RP11-669E14.4	0:0	ncRNA_intronic	0.672	7	5	14	1	1	0
17	17	44210933	rs7207582	43987723	rs28439143	0.96339	rs7207582	A	G	0.00651771	4.46545	7.99e-06	-4.783	1.727e-06	MAPT:RP11-669E14.4	0:0	ncRNA_intronic	9.325	6	5	14	1	1	0
17	17	44210933	rs7207582	43987801	rs56189701	0.95829	rs7207582	C	T	0.0059338	4.48989	7.126e-06	-4.78581	1.703e-06	MAPT:RP11-669E14.4	0:0	ncRNA_intronic	1.194	6	5	14	1	1	0
17	17	44210933	rs7207582	43988205	rs2435204	0.952657	rs7207582	G	A	0.0140677	4.24861	2.151e-05	-4.98126	6.317e-07	MAPT	0	intronic	0.273	5	5	14	1	1	0
17	17	44210933	rs7207582	43988623	rs62056835	0.958005	rs7207582	A	G	0.00566017	4.50237	6.72e-06	-4.83181	1.353e-06	MAPT	0	intronic	0.361	6	5	14	1	1	0
17	17	44210933	rs7207582	43988884	rs62056837	0.96339	rs7207582	C	T	0.00640941	4.46962	7.836e-06	-4.86424	1.149e-06	MAPT	0	intronic	3.916	7	5	14	1	1	0
17	17	44210933	rs7207582	43989087	rs62056838	0.96339	rs7207582	G	A	0.00640941	4.46962	7.836e-06	-4.84866	1.243e-06	MAPT	0	intronic	0.815	6	5	14	1	1	0
17	17	44210933	rs7207582	43989221	rs62056839	0.96339	rs7207582	C	T	0.00640941	4.46962	7.836e-06	-4.86252	1.159e-06	MAPT	0	intronic	4.549	6	5	14	1	1	0
17	17	44210933	rs7207582	43989689	rs62056840	0.96339	rs7207582	C	T	0.00645115	4.46801	7.895e-06	-4.84518	1.265e-06	MAPT	0	intronic	6.879	7	4	9	1	1	0
17	17	44210933	rs7207582	43989898	rs112116311	0.96339	rs7207582	G	T	0.00645115	4.46801	7.895e-06	-4.85947	1.177e-06	MAPT	0	intronic	2.302	5	4	9	1	1	0
17	17	44210933	rs7207582	43989909	rs78209533	0.96339	rs7207582	G	A	0.00645115	4.46801	7.895e-06	-4.86736	1.131e-06	MAPT	0	intronic	4.777	5	4	9	1	1	0
17	17	44210933	rs7207582	43990041	rs62056841	0.96339	rs7207582	C	A	0.00645115	4.46801	7.895e-06	-4.82572	1.395e-06	MAPT	0	intronic	0.24	5	4	9	1	1	0
17	17	44210933	rs7207582	43990072	rs79860128	0.96339	rs7207582	G	A	0.00645115	4.46801	7.895e-06	-4.8396	1.301e-06	MAPT	0	intronic	0.747	6	4	9	1	1	0
17	17	44210933	rs7207582	43990662	rs9944484	0.96339	rs7207582	A	G	0.00660273	4.46218	8.113e-06	-4.8583	1.184e-06	MAPT	0	intronic	2.165	7	4	14	1	1	0
17	17	44210933	rs7207582	43990919	rs17563965	0.96339	rs7207582	G	A	0.00651562	4.46553	7.987e-06	-4.95077	7.392e-07	MAPT	0	intronic	4.407	1f	4	14	1	1	0
17	17	44210933	rs7207582	43991272	rs17563986	0.96339	rs7207582	G	A	0.00612867	4.48098	7.43e-06	-4.94511	7.61e-07	MAPT	0	intronic	1.378	1f	4	14	1	1	0
17	17	44210933	rs7207582	43991781	rs17564020	0.96339	rs7207582	T	G	0.00636305	4.4714	7.771e-06	-4.89027	1.007e-06	MAPT	0	intronic	6.387	1b	2	14	1	1	0
17	17	44210933	rs7207582	43991888	rs55682376	0.96339	rs7207582	A	G	0.00632064	4.47303	7.712e-06	-4.80702	1.532e-06	MAPT	0	intronic	1.095	4	4	14	1	1	0
17	17	44210933	rs7207582	43992233	rs55788678	0.96339	rs7207582	T	C	0.00627791	4.47467	7.653e-06	-4.85514	1.203e-06	MAPT	0	intronic	2.103	7	4	14	1	1	0
17	17	44210933	rs7207582	43992244	rs56042957	0.96339	rs7207582	A	G	0.00627791	4.47467	7.653e-06	-4.86355	1.153e-06	MAPT	0	intronic	1.306	7	4	14	1	1	0
17	17	44210933	rs7207582	43992283	rs55810795	0.96339	rs7207582	G	A	0.0062385	4.47618	7.599e-06	-4.87538	1.086e-06	MAPT	0	intronic	0.147	7	4	14	1	1	0
17	17	44210933	rs7207582	43992305	rs55933304	0.96339	rs7207582	A	G	0.00627791	4.47467	7.653e-06	-4.88832	1.017e-06	MAPT	0	intronic	2.568	7	4	14	1	1	0
17	17	44210933	rs7207582	43992456	rs62056848	0.96339	rs7207582	A	G	0.00623557	4.47629	7.595e-06	-4.85531	1.202e-06	MAPT	0	intronic	9.372	5	4	14	1	1	0
17	17	44210933	rs7207582	43992581	rs62056850	0.958005	rs7207582	T	C	0.00582184	4.495	6.957e-06	-4.90094	9.538e-07	MAPT	0	intronic	0.329	4	4	14	1	1	0
17	17	44210933	rs7207582	43992806	rs62056851	0.96339	rs7207582	G	A	0.00616369	4.47938	7.486e-06	-4.80623	1.538e-06	MAPT	0	intronic	7.993	4	2	14	1	1	0
17	17	44210933	rs7207582	43994252	rs77926909	0.958005	rs7207582	C	T	0.00859527	4.39125	1.127e-05	-4.74106	2.126e-06	MAPT	0	intronic	4.478	5	4	15	1	1	0
17	17	44210933	rs7207582	43994358	rs111541901	0.96339	rs7207582	T	C	0.00593118	4.49001	7.122e-06	-4.77322	1.813e-06	MAPT	0	intronic	1.808	5	4	15	1	1	0
17	17	44210933	rs7207582	43994386	rs17649518	0.96339	rs7207582	A	C	0.00593118	4.49001	7.122e-06	-4.91248	8.993e-07	MAPT	0	intronic	3.773	1f	4	15	1	1	0
17	17	44210933	rs7207582	43994435	rs62056859	0.96339	rs7207582	G	A	0.00593053	4.49004	7.121e-06	-4.78723	1.691e-06	MAPT	0	intronic	4.915	5	4	15	1	1	0
17	17	44210933	rs7207582	43994623	rs112647192	0.96339	rs7207582	A	G	0.00593118	4.49001	7.122e-06	-4.85796	1.186e-06	MAPT	0	intronic	0.013	4	4	14	1	1	0
17	17	44210933	rs7207582	43994648	rs17649553	0.958005	rs7207582	T	C	0.00618173	4.47856	7.515e-06	-4.89451	9.855e-07	MAPT	0	intronic	0.289		4	14	1	1	0
17	17	44210933	rs7207582	43994952	rs17649571	0.96339	rs7207582	G	A	0.00589568	4.49163	7.068e-06	-4.90794	9.204e-07	MAPT	0	intronic	5.951	1f	4	14	1	1	0
17	17	44210933	rs7207582	43995098	rs17564153	0.96339	rs7207582	A	G	0.00589832	4.49151	7.072e-06	-4.92886	8.271e-07	MAPT	0	intronic	0.591	6	4	14	1	1	0
17	17	44210933	rs7207582	43995990	rs17649635	0.96339	rs7207582	G	A	0.00607436	4.48347	7.344e-06	-4.82344	1.411e-06	MAPT	0	intronic	1.403	5	4	14	1	1	0
17	17	44210933	rs7207582	43996908	rs55760800	0.96339	rs7207582	G	T	0.00593773	4.48971	7.132e-06	-4.8052	1.546e-06	MAPT	0	intronic	5.656	5	4	14	1	1	0
17	17	44210933	rs7207582	43996960	rs56303672	0.96339	rs7207582	G	A	0.00593773	4.48971	7.132e-06	-4.81217	1.493e-06	MAPT	0	intronic	5.342	5	4	14	1	1	0
17	17	44210933	rs7207582	43997372	rs17649641	0.96339	rs7207582	C	T	0.00543478	4.51263	6.403e-06	-4.9379	7.897e-07	MAPT	0	intronic	7.818	1f	2	14	1	1	0
17	17	44210933	rs7207582	43997520	rs17564223	0.958005	rs7207582	T	C	0.00753755	4.42606	9.597e-06	-4.9639	6.909e-07	MAPT	0	intronic	5.256	1f	2	14	1	1	0
17	17	44210933	rs7207582	43998151	rs62058962	0.96339	rs7207582	T	C	0.00590359	4.49127	7.08e-06	-4.82888	1.373e-06	MAPT	0	intronic	6.377	5	4	15	1	1	0
17	17	44210933	rs7207582	43998328	rs1467969	0.96339	rs7207582	T	C	0.00543259	4.51272	6.4e-06	-4.92334	8.508e-07	MAPT	0	intronic	0.98	6	4	15	1	1	0
17	17	44210933	rs7207582	43998574	rs1467970	0.96339	rs7207582	G	T	0.00590293	4.4913	7.079e-06	-4.91591	8.837e-07	MAPT	0	intronic	4.058	1f	4	15	1	1	0
17	17	44210933	rs7207582	43998767	rs767058	0.96339	rs7207582	C	T	0.00590293	4.4913	7.079e-06	-4.89237	9.963e-07	MAPT	0	intronic	5.095		4	15	1	1	0
17	17	44210933	rs7207582	43998822	rs767057	0.96339	rs7207582	G	A	0.00586854	4.49287	7.027e-06	-4.94386	7.659e-07	MAPT	0	intronic	5.857		4	15	1	1	0
17	17	44210933	rs7207582	43998910	rs767056	0.96339	rs7207582	T	C	0.00586854	4.49287	7.027e-06	-4.97577	6.499e-07	MAPT	0	intronic	1.304		4	15	1	1	0
17	17	44210933	rs7207582	43999406	rs62058964	0.958005	rs7207582	G	A	0.00596966	4.48825	7.181e-06	-4.82274	1.416e-06	MAPT	0	intronic	4.469	5	4	14	1	1	0
17	17	44210933	rs7207582	43999793	rs1476127	0.96339	rs7207582	A	G	0.005774	4.49718	6.886e-06	-4.85913	1.179e-06	MAPT	0	intronic	4.444	5	4	14	1	1	0
17	17	44210933	rs7207582	44000202	rs55929431	0.96339	rs7207582	A	G	0.00601041	4.48639	7.244e-06	-4.88016	1.06e-06	MAPT	0	intronic	0.461	5	4	15	1	1	1
17	17	44210933	rs7207582	44000505	rs56002706	0.96339	rs7207582	T	C	0.005774	4.49718	6.886e-06	-4.8615	1.165e-06	MAPT	0	intronic	0.351	5	2	14	1	1	1
17	17	44210933	rs7207582	44000610	rs8078495	0.96339	rs7207582	A	G	0.005774	4.49718	6.886e-06	-4.95233	7.333e-07	MAPT	0	intronic	0.01	1f	5	14	1	1	1
17	17	44210933	rs7207582	44000914	rs17649866	0.96339	rs7207582	C	T	0.00573454	4.49898	6.828e-06	-4.97041	6.681e-07	MAPT	0	intronic	1.34	1f	2	14	1	1	1
17	17	44210933	rs7207582	44001228	rs62058968	0.96339	rs7207582	A	G	0.00573795	4.49883	6.833e-06	-4.84191	1.286e-06	MAPT	0	intronic	2.492	4	2	14	1	1	1
17	17	44210933	rs7207582	44001379	rs17564493	0.96339	rs7207582	T	C	0.00573795	4.49883	6.833e-06	-4.97592	6.494e-07	MAPT	0	intronic	8.427	1f	2	14	1	1	1
17	17	44210933	rs7207582	44001621	rs17649918	0.96339	rs7207582	G	A	0.00573454	4.49898	6.828e-06	-4.97178	6.634e-07	MAPT	0	intronic	8.304	1f	2	15	1	1	1
17	17	44210933	rs7207582	44001661	rs17649954	0.96339	rs7207582	G	A	0.00573454	4.49898	6.828e-06	-4.98799	6.101e-07	MAPT	0	intronic	4.535	1f	2	15	1	1	1
17	17	44210933	rs7207582	44001957	rs55685451	0.96339	rs7207582	G	T	0.00573454	4.49898	6.828e-06	-4.88813	1.018e-06	MAPT	0	intronic	9.237	5	2	15	1	1	1
17	17	44210933	rs7207582	44002062	rs17564591	0.96339	rs7207582	C	A	0.00573454	4.49898	6.828e-06	-4.87538	1.086e-06	MAPT	0	intronic	0.792	5	2	15	1	1	1
17	17	44210933	rs7207582	44002138	rs17564619	0.96339	rs7207582	G	A	0.00601041	4.48639	7.244e-06	-4.98958	6.051e-07	MAPT	0	intronic	1.304	1f	2	15	1	1	1
17	17	44210933	rs7207582	44002431	rs62059003	0.96339	rs7207582	T	C	0.00573795	4.49883	6.833e-06	-4.85301	1.216e-06	MAPT	0	intronic	7.819	7	5	15	1	1	1
17	17	44210933	rs7207582	44002555	rs17650063	0.96339	rs7207582	G	A	0.00522621	4.5221	6.123e-06	-4.98952	6.053e-07	MAPT	0	intronic	0.975	1f	5	15	1	1	1
17	17	44210933	rs7207582	44002595	rs17564703	0.96339	rs7207582	T	C	0.00636449	4.47134	7.773e-06	-4.87483	1.089e-06	MAPT	0	intronic	0.162	5	5	15	1	1	1
17	17	44210933	rs7207582	44002969	rs76090253	0.96339	rs7207582	C	A	0.00569544	4.50076	6.771e-06	-4.88222	1.049e-06	MAPT	0	intronic	1.009	4	5	15	1	1	1
17	17	44210933	rs7207582	44003446	rs56197117	0.96339	rs7207582	G	A	0.00573454	4.49898	6.828e-06	-4.87321	1.098e-06	MAPT	0	intronic	0.143	6	5	15	1	1	1
17	17	44210933	rs7207582	44003599	rs56249311	0.96339	rs7207582	T	C	0.00573795	4.49883	6.833e-06	-4.8772	1.076e-06	MAPT	0	intronic	1.941	6	5	15	1	1	1
17	17	44210933	rs7207582	44003893	rs62059004	0.96339	rs7207582	G	A	0.00573454	4.49898	6.828e-06	-4.87647	1.08e-06	MAPT	0	intronic	7.611	7	5	15	1	1	1
17	17	44210933	rs7207582	44004076	rs76500077	0.96339	rs7207582	C	T	0.00573454	4.49898	6.828e-06	-4.84486	1.267e-06	MAPT	0	intronic	0.752	6	5	15	1	1	1
17	17	44210933	rs7207582	44004472	rs62059005	0.96339	rs7207582	G	A	0.00576925	4.4974	6.879e-06	-4.86048	1.171e-06	MAPT	0	intronic	3.755	5	5	14	1	1	1
17	17	44210933	rs7207582	44005329	rs112454267	0.958195	rs7207582	A	G	0.00700425	4.4467	8.72e-06	-4.77278	1.817e-06	MAPT	0	intronic	0.706	5	5	9	1	1	1
17	17	44210933	rs7207582	44005413	rs17564780	0.958195	rs7207582	G	A	0.00688295	4.45138	8.532e-06	-4.96805	6.763e-07	MAPT	0	intronic	1.552		5	9	1	1	1
17	17	44210933	rs7207582	44005615	rs62059007	0.96339	rs7207582	G	A	0.00580438	4.4958	6.931e-06	-4.81084	1.503e-06	MAPT	0	intronic	6.443	5	5	9	1	1	1
17	17	44210933	rs7207582	44006085	rs62059008	0.96339	rs7207582	G	A	0.00604633	4.48475	7.3e-06	-4.80326	1.561e-06	MAPT	0	intronic	1.997	7	5	9	1	1	1
17	17	44210933	rs7207582	44006130	rs62059009	0.96339	rs7207582	C	T	0.00583924	4.49421	6.983e-06	-4.8583	1.184e-06	MAPT	0	intronic	0.454	6	5	9	1	1	1
17	17	44210933	rs7207582	44006252	rs62061705	0.96339	rs7207582	C	T	0.00583924	4.49421	6.983e-06	-4.85042	1.232e-06	MAPT	0	intronic	2.745	7	5	14	1	1	1
17	17	44210933	rs7207582	44006601	rs17564829	0.96339	rs7207582	C	T	0.00590886	4.49103	7.088e-06	-4.86252	1.159e-06	MAPT	0	intronic	5.304	7	5	14	1	1	1
17	17	44210933	rs7207582	44006896	rs62061706	0.96339	rs7207582	C	T	0.00583924	4.49421	6.983e-06	-4.87757	1.074e-06	MAPT	0	intronic	0.951	4	5	14	1	1	1
17	17	44210933	rs7207582	44006954	rs62061707	0.96339	rs7207582	C	T	0.00583924	4.49421	6.983e-06	-4.87142	1.108e-06	MAPT	0	intronic	7.164	4	5	14	1	1	1
17	17	44210933	rs7207582	44006956	rs62061708	0.96339	rs7207582	G	A	0.00583924	4.49421	6.983e-06	-4.89125	1.002e-06	MAPT	0	intronic	0.358	4	5	14	1	1	1
17	17	44210933	rs7207582	44007493	rs62061709	0.96339	rs7207582	T	C	0.00573249	4.49907	6.825e-06	-4.83672	1.32e-06	MAPT	0	intronic	0.271	7	5	15	1	1	1
17	17	44210933	rs7207582	44009876	rs62061712	0.96339	rs7207582	A	C	0.00580438	4.4958	6.931e-06	-4.82643	1.39e-06	MAPT	0	intronic	2.141	7	2	14	1	1	1
17	17	44210933	rs7207582	44009921	rs7501759	0.96339	rs7207582	G	A	0.00579697	4.49613	6.92e-06	-4.97331	6.582e-07	MAPT	0	intronic	3.968	6	2	14	1	1	1
17	17	44210933	rs7207582	44010040	rs2316782	0.96339	rs7207582	G	A	0.00579697	4.49613	6.92e-06	-4.97786	6.429e-07	MAPT	0	intronic	11.03	6	5	14	1	1	1
17	17	44210933	rs7207582	44010405	rs62061713	0.96339	rs7207582	G	A	0.00579697	4.49613	6.92e-06	-4.87757	1.074e-06	MAPT	0	intronic	2.546	5	1	14	1	1	1
17	17	44210933	rs7207582	44010452	rs62061714	0.96339	rs7207582	A	C	0.00540994	4.51375	6.369e-06	-4.85964	1.176e-06	MAPT	0	intronic	0.16	5	1	14	1	1	1
17	17	44210933	rs7207582	44010661	rs113952577	0.96339	rs7207582	G	A	0.00579697	4.49613	6.92e-06	-4.80314	1.562e-06	MAPT	0	intronic	3.527	7	1	14	1	1	1
17	17	44210933	rs7207582	44010984	rs78077519	0.96339	rs7207582	A	G	0.00583657	4.49433	6.979e-06	-4.85171	1.224e-06	MAPT	0	intronic	0.861	6	1	14	1	1	1
17	17	44210933	rs7207582	44011018	rs17564871	0.96339	rs7207582	G	A	0.00583189	4.49454	6.972e-06	-4.9304	8.206e-07	MAPT	0	intronic	6.615	6	1	14	1	1	1
17	17	44210933	rs7207582	44011073	rs17650258	0.96339	rs7207582	A	G	0.00583657	4.49433	6.979e-06	-4.8485	1.244e-06	MAPT	0	intronic	1.717	5	1	14	1	1	1
17	17	44210933	rs7207582	44011526	rs62061715	0.96339	rs7207582	G	A	0.00583189	4.49454	6.972e-06	-4.84946	1.238e-06	MAPT	0	intronic	1.143	6	1	14	1	1	1
17	17	44210933	rs7207582	44011749	rs17564948	0.96339	rs7207582	G	A	0.00587053	4.49278	7.03e-06	-4.97216	6.621e-07	MAPT	0	intronic	1.631	1f	1	14	1	1	1
17	17	44210933	rs7207582	44011825	rs17564983	0.96339	rs7207582	C	A	0.00587053	4.49278	7.03e-06	-4.96785	6.77e-07	MAPT	0	intronic	0.298	6	1	14	1	1	1
17	17	44210933	rs7207582	44012096	rs62061716	0.96339	rs7207582	G	A	0.00587053	4.49278	7.03e-06	-4.85897	1.18e-06	MAPT	0	intronic	4.399	5	2	14	1	1	1
17	17	44210933	rs7207582	44012343	rs17650335	0.96339	rs7207582	A	G	0.0059082	4.49106	7.087e-06	-4.97007	6.693e-07	MAPT	0	intronic	4.437	6	2	14	1	1	1
17	17	44210933	rs7207582	44012463	rs17565025	0.958005	rs7207582	C	T	0.00507496	4.52901	5.926e-06	-4.98569	6.174e-07	MAPT	0	intronic	5.491	6	1	14	1	1	1
17	17	44210933	rs7207582	44012915	rs77924424	0.96339	rs7207582	C	T	0.00590557	4.49118	7.083e-06	-4.87502	1.088e-06	MAPT	0	intronic	5.024	4	1	14	1	1	1
17	17	44210933	rs7207582	44012989	rs62061719	0.96339	rs7207582	T	C	0.0059082	4.49106	7.087e-06	-4.86355	1.153e-06	MAPT	0	intronic	1.396	5	1	14	1	1	1
17	17	44210933	rs7207582	44013024	rs17650381	0.96339	rs7207582	C	T	0.00681735	4.45391	8.432e-06	-4.9714	6.647e-07	MAPT	0	intronic	9.758	6	1	14	1	1	1
17	17	44210933	rs7207582	44013103	rs17650417	0.96339	rs7207582	T	G	0.0059082	4.49106	7.087e-06	-4.95686	7.164e-07	MAPT	0	intronic	6.738	1f	1	14	1	1	1
17	17	44210933	rs7207582	44013189	rs62061720	0.96339	rs7207582	T	C	0.00594426	4.48941	7.142e-06	-4.87267	1.101e-06	MAPT	0	intronic	2.388	5	1	14	1	1	1
17	17	44210933	rs7207582	44013346	rs62061721	0.96339	rs7207582	C	T	0.00590557	4.49118	7.083e-06	-4.89007	1.008e-06	MAPT	0	intronic	5.329	4	1	14	1	1	1
17	17	44210933	rs7207582	44013475	rs79857651	0.96339	rs7207582	A	G	0.00594426	4.48941	7.142e-06	-4.91789	8.748e-07	MAPT	0	intronic	2.983	4	1	14	1	1	1
17	17	44210933	rs7207582	44013483	rs113756354	0.96339	rs7207582	G	A	0.005941	4.48956	7.137e-06	-4.91417	8.916e-07	MAPT	0	intronic	0.837	2b	1	14	1	1	1
17	17	44210933	rs7207582	44013938	rs12150111	0.96339	rs7207582	G	A	0.00558177	4.50594	6.608e-06	-5.03133	4.871e-07	MAPT	0	intronic	0.54	1f	2	14	1	1	1
17	17	44210933	rs7207582	44014137	rs12150460	0.96339	rs7207582	T	G	0.00594426	4.48941	7.142e-06	-5.0241	5.058e-07	MAPT	0	intronic	1.684	1d	2	14	1	1	1
17	17	44210933	rs7207582	44014263	rs12150195	0.96339	rs7207582	C	T	0.00605208	4.48449	7.309e-06	-5.00054	5.717e-07	MAPT	0	intronic	1.538	1f	5	14	1	1	1
17	17	44210933	rs7207582	44014384	rs55874169	0.96339	rs7207582	A	G	0.00609084	4.48271	7.37e-06	-4.86167	1.164e-06	MAPT	0	intronic	0.104	4	5	14	1	1	1
17	17	44210933	rs7207582	44015446	rs12150229	0.96339	rs7207582	G	A	0.00612113	4.48133	7.418e-06	-5.05651	4.27e-07	MAPT	0	intronic	2.019	6	5	14	1	1	1
17	17	44210933	rs7207582	44015464	rs12150230	0.96339	rs7207582	G	A	0.00612113	4.48133	7.418e-06	-5.07881	3.798e-07	MAPT	0	intronic	2.931	6	5	14	1	1	1
17	17	44210933	rs7207582	44015624	rs12150576	0.96339	rs7207582	A	G	0.00598393	4.4876	7.203e-06	-4.94194	7.735e-07	MAPT	0	intronic	5.811	6	5	14	1	1	1
17	17	44210933	rs7207582	44015745	rs12150235	0.96339	rs7207582	G	A	0.00612113	4.48133	7.418e-06	-5.03105	4.878e-07	MAPT	0	intronic	0.328	6	5	14	1	1	1
17	17	44210933	rs7207582	44015816	rs12150242	0.96339	rs7207582	G	A	0.00612113	4.48133	7.418e-06	-4.99387	5.918e-07	MAPT	0	intronic	2.681	1f	5	14	1	1	1
17	17	44210933	rs7207582	44015929	rs12150104	0.96339	rs7207582	A	G	0.00612615	4.4811	7.426e-06	-5.01607	5.274e-07	MAPT	0	intronic	4.376	1f	5	14	1	1	1
17	17	44210933	rs7207582	44016341	rs62061726	0.96339	rs7207582	A	G	0.00619722	4.47785	7.54e-06	-4.87611	1.082e-06	MAPT	0	intronic	1.866	7	5	14	1	1	1
17	17	44210933	rs7207582	44016462	rs113537106	0.96339	rs7207582	G	A	0.00615621	4.47972	7.474e-06	-4.86859	1.124e-06	MAPT	0	intronic	2.502	6	5	14	1	1	1
17	17	44210933	rs7207582	44017124	rs62061727	0.96339	rs7207582	T	G	0.00619722	4.47785	7.54e-06	-4.8716	1.107e-06	MAPT	0	intronic	6.543	5	5	14	1	1	1
17	17	44210933	rs7207582	44017180	rs62061728	0.96339	rs7207582	G	T	0.00630547	4.47361	7.691e-06	-4.90717	9.24e-07	MAPT	0	intronic	4.759	5	5	14	1	1	1
17	17	44210933	rs7207582	44017283	rs62061729	0.96339	rs7207582	G	A	0.00630547	4.47361	7.691e-06	-4.89477	9.842e-07	MAPT	0	intronic	0.939	5	5	14	1	1	1
17	17	44210933	rs7207582	44017342	rs62061730	0.96339	rs7207582	G	A	0.00630547	4.47361	7.691e-06	-4.89503	9.829e-07	MAPT	0	intronic	8.793	5	5	14	1	1	1
17	17	44210933	rs7207582	44017666	rs62061731	0.96339	rs7207582	A	C	0.00600267	4.48674	7.232e-06	-4.85597	1.198e-06	MAPT	0	intronic	2.074	6	2	14	1	1	1
17	17	44210933	rs7207582	44017941	rs62061732	0.96339	rs7207582	T	G	0.0059082	4.49106	7.087e-06	-4.84518	1.265e-06	MAPT	0	intronic	1.623	4	5	14	1	1	1
17	17	44210933	rs7207582	44018399	rs62061733	0.952657	rs7207582	G	A	0.00604569	4.48478	7.299e-06	-4.60257	4.173e-06	MAPT	0	intronic	9.246	4	5	14	1	1	1
17	17	44210933	rs7207582	44018519	rs7210219	0.896619	rs7207582	C	T	0.0142277	4.65102	3.303e-06	-4.27857	1.881e-05	MAPT	0	intronic	4.469	5	2	14	1	1	1
17	17	44210933	rs7207582	44019643	rs62062769	0.96339	rs7207582	A	G	0.00569888	4.50061	6.776e-06	-4.92567	8.407e-07	MAPT	0	intronic	5.079	2b	2	14	1	1	1
17	17	44210933	rs7207582	44019680	rs62062770	0.96339	rs7207582	C	T	0.00570026	4.50054	6.778e-06	-4.89551	9.805e-07	MAPT	0	intronic	7.286	2b	2	14	1	1	1
17	17	44210933	rs7207582	44020282	rs62062771	0.96339	rs7207582	A	G	0.00566364	4.50221	6.725e-06	-4.91437	8.907e-07	MAPT	0	intronic	12.01	5	2	14	1	1	1
17	17	44210933	rs7207582	44020314	rs62062772	0.96339	rs7207582	T	C	0.00566364	4.50221	6.725e-06	-4.9275	8.329e-07	MAPT	0	intronic	2.301	4	2	14	1	1	1
17	17	44210933	rs7207582	44020545	rs62062773	0.96339	rs7207582	G	A	0.00566572	4.50212	6.728e-06	-4.97544	6.51e-07	MAPT	0	intronic	2.963	5	2	14	1	1	1
17	17	44210933	rs7207582	44021061	rs79115768	0.96339	rs7207582	T	C	0.00562743	4.50386	6.673e-06	-4.85042	1.232e-06	MAPT	0	intronic	1.984	7	2	14	1	1	1
17	17	44210933	rs7207582	44021218	rs28416808	0.958195	rs7207582	T	C	0.00551852	4.50882	6.519e-06	-4.91877	8.709e-07	MAPT	0	intronic	5.606	5	4	14	1	1	1
17	17	44210933	rs7207582	44021463	rs62062774	0.96339	rs7207582	C	T	0.00559587	4.5053	6.628e-06	-4.89668	9.747e-07	MAPT	0	intronic	3.969	4	4	14	1	1	1
17	17	44210933	rs7207582	44021699	rs2316784	0.96339	rs7207582	T	G	0.00559165	4.50549	6.622e-06	-4.71747	2.388e-06	MAPT	0	intronic	3.529	1f	4	14	1	1	1
17	17	44210933	rs7207582	44021717	rs4327091	0.96339	rs7207582	A	G	0.00607372	4.4835	7.343e-06	-4.78842	1.681e-06	MAPT	0	intronic	0.278	1f	4	14	1	1	1
17	17	44210933	rs7207582	44021744	rs4479290	0.96339	rs7207582	C	T	0.00556055	4.50691	6.578e-06	-4.73766	2.162e-06	MAPT	0	intronic	1.274	5	4	14	1	1	1
17	17	44210933	rs7207582	44022043	rs62062776	0.96339	rs7207582	C	A	0.00556055	4.50691	6.578e-06	-4.95916	7.08e-07	MAPT	0	intronic	8.099	5	4	14	1	1	1
17	17	44210933	rs7207582	44022068	rs62062777	0.96339	rs7207582	A	G	0.00555629	4.5071	6.572e-06	-4.93384	8.063e-07	MAPT	0	intronic	0.051	5	4	14	1	1	1
17	17	44210933	rs7207582	44022319	rs75839508	0.96339	rs7207582	A	G	0.00565114	4.50278	6.707e-06	-4.92332	8.509e-07	MAPT	0	intronic	2.6	5	4	14	1	1	1
17	17	44210933	rs7207582	44022376	rs75686108	0.96339	rs7207582	T	C	0.00555629	4.5071	6.572e-06	-4.8651	1.144e-06	MAPT	0	intronic	10.26		4	14	1	1	1
17	17	44210933	rs7207582	44022433	rs79765413	0.96339	rs7207582	C	T	0.00565044	4.50281	6.706e-06	-4.76495	1.889e-06	MAPT	0	intronic	0.024		4	14	1	1	1
17	17	44210933	rs7207582	44022434	rs78834738	0.96339	rs7207582	A	G	0.00565114	4.50278	6.707e-06	-4.78034	1.75e-06	MAPT	0	intronic	0.069		4	14	1	1	1
17	17	44210933	rs7207582	44022528	rs62062778	0.96339	rs7207582	G	A	0.00565044	4.50281	6.706e-06	-4.89525	9.818e-07	MAPT	0	intronic	5.858	5	4	14	1	1	1
17	17	44210933	rs7207582	44022577	rs62062779	0.96339	rs7207582	C	A	0.00565044	4.50281	6.706e-06	-4.9966	5.835e-07	MAPT	0	intronic	1.311	6	4	14	1	1	1
17	17	44210933	rs7207582	44022593	rs62062780	0.96339	rs7207582	T	C	0.00565114	4.50278	6.707e-06	-5.00611	5.554e-07	MAPT	0	intronic	2.709	6	4	14	1	1	1
17	17	44210933	rs7207582	44022632	rs62062781	0.96339	rs7207582	A	G	0.00555629	4.5071	6.572e-06	-4.9279	8.312e-07	MAPT	0	intronic	1.845	5	5	14	1	1	1
17	17	44210933	rs7207582	44023087	rs62062782	0.96339	rs7207582	A	G	0.00551136	4.50914	6.509e-06	-4.99505	5.882e-07	MAPT	0	intronic	5.8	7	5	14	1	1	1
17	17	44210933	rs7207582	44023520	rs62062783	0.96339	rs7207582	G	T	0.00565044	4.50281	6.706e-06	-4.9694	6.716e-07	MAPT	0	intronic	1.865	5	5	14	1	1	1
17	17	44210933	rs7207582	44024562	rs62062785	0.96339	rs7207582	T	G	0.00561483	4.50443	6.655e-06	-4.95109	7.38e-07	MAPT	0	intronic	0.856	4	5	14	1	1	1
17	17	44210933	rs7207582	44024865	rs62062787	0.96339	rs7207582	C	T	0.00561553	4.5044	6.656e-06	-4.92941	8.248e-07	MAPT	0	intronic	12.27	5	5	14	1	1	1
17	17	44210933	rs7207582	44024906	rs62062788	0.96339	rs7207582	G	A	0.00561553	4.5044	6.656e-06	-4.95278	7.316e-07	MAPT	0	intronic	2.982	5	5	14	1	1	1
17	17	44210933	rs7207582	44025033	rs62062789	0.96339	rs7207582	C	T	0.00561553	4.5044	6.656e-06	-4.97018	6.689e-07	MAPT	0	intronic	0.922	5	5	14	1	1	1
17	17	44210933	rs7207582	44025045	rs62062790	0.96339	rs7207582	T	C	0.00561483	4.50443	6.655e-06	-4.97759	6.438e-07	MAPT	0	intronic	0.097	5	5	14	1	1	1
17	17	44210933	rs7207582	44025273	rs62062791	0.96339	rs7207582	A	G	0.00561483	4.50443	6.655e-06	-4.94712	7.532e-07	MAPT	0	intronic	9.128	7	5	14	1	1	1
17	17	44210933	rs7207582	44025347	rs62062792	0.96339	rs7207582	C	T	0.00561553	4.5044	6.656e-06	-4.94409	7.65e-07	MAPT	0	intronic	8.743	6	5	14	1	1	1
17	17	44210933	rs7207582	44025650	rs113395365	0.96339	rs7207582	C	T	0.00561553	4.5044	6.656e-06	-4.94463	7.629e-07	MAPT	0	intronic	4.146	5	5	14	1	1	1
17	17	44210933	rs7207582	44025888	rs242559	0.908241	rs7207582	C	A	0.00880844	4.38422	1.164e-05	-4.99342	5.932e-07	MAPT	0	intronic	1.461	1b	2	14	1	1	1
17	17	44210933	rs7207582	44026321	rs62062793	0.96339	rs7207582	C	T	0.00561553	4.5044	6.656e-06	-4.85547	1.201e-06	MAPT	0	intronic	8.668	4	1	7	1	1	1
17	17	44210933	rs7207582	44026394	rs62062794	0.96339	rs7207582	G	A	0.00561553	4.5044	6.656e-06	-4.89431	9.865e-07	MAPT	0	intronic	5.62	4	1	7	1	1	1
17	17	44210933	rs7207582	44026478	rs78556223	0.953066	rs7207582	G	A	0.00603289	4.48536	7.279e-06	-4.76304	1.907e-06	MAPT	0	intronic	6.549		1	12	1	1	1
17	17	44210933	rs7207582	44026548	rs242561	0.96339	rs7207582	T	C	0.00702018	4.44608	8.745e-06	-4.89579	9.791e-07	MAPT	0	intronic	17.47		1	12	1	1	1
17	17	44210933	rs7207582	44027090	rs62062795	0.96339	rs7207582	T	C	0.00595926	4.48873	7.165e-06	-4.86859	1.124e-06	MAPT	0	intronic	2.697	4	2	13	1	1	1
17	17	44210933	rs7207582	44027316	rs62062796	0.96339	rs7207582	A	G	0.00595926	4.48873	7.165e-06	-4.80872	1.519e-06	MAPT	0	intronic	7.753	2a	5	13	1	1	1
17	17	44210933	rs7207582	44027366	rs62062797	0.96339	rs7207582	G	T	0.00605654	4.48428	7.316e-06	-4.5973	4.28e-06	MAPT	0	intronic	2.47	2b	5	13	1	1	1
17	17	44210933	rs7207582	44027383	rs62062798	0.96339	rs7207582	G	A	0.00605654	4.48428	7.316e-06	-4.63043	3.649e-06	MAPT	0	intronic	4.494	4	5	13	1	1	1
17	17	44210933	rs7207582	44027521	rs62062799	0.96339	rs7207582	T	G	0.00608831	4.48283	7.366e-06	-4.90067	9.551e-07	MAPT	0	intronic	2.978	5	5	13	1	1	1
17	17	44210933	rs7207582	44027753	rs62062800	0.96339	rs7207582	G	A	0.00609148	4.48268	7.371e-06	-4.91235	8.999e-07	MAPT	0	intronic	8.285	5	5	13	1	1	1
17	17	44210933	rs7207582	44028011	rs62062801	0.96339	rs7207582	G	T	0.00609148	4.48268	7.371e-06	-4.92721	8.341e-07	MAPT	0	intronic	1.178	6	5	13	1	1	1
17	17	44210933	rs7207582	44028045	rs62062802	0.96339	rs7207582	T	G	0.00608831	4.48283	7.366e-06	-4.9278	8.316e-07	MAPT	0	intronic	1.389	6	5	13	1	1	1
17	17	44210933	rs7207582	44028183	rs62062803	0.96339	rs7207582	C	T	0.00439028	4.56609	4.969e-06	-4.8615	1.165e-06	MAPT	0	intronic	4.198	7	5	13	1	1	1
17	17	44210933	rs7207582	44028707	rs74903707	0.96339	rs7207582	A	G	0.00612427	4.48118	7.423e-06	-4.89885	9.64e-07	MAPT	0	intronic	0.2	4	5	14	1	1	1
17	17	44210933	rs7207582	44028796	rs77017444	0.96339	rs7207582	C	T	0.00612678	4.48107	7.427e-06	-4.83078	1.36e-06	MAPT	0	intronic	4.836	2b	5	14	1	1	1
17	17	44210933	rs7207582	44030115	rs17650579	0.96339	rs7207582	T	C	0.00623557	4.47629	7.595e-06	-5.01574	5.283e-07	MAPT	0	intronic	2.106	6	5	14	1	1	1
17	17	44210933	rs7207582	44030231	rs17650633	0.96339	rs7207582	C	T	0.00623557	4.47629	7.595e-06	-4.99515	5.879e-07	MAPT	0	intronic	4.118	6	5	14	1	1	1
17	17	44210933	rs7207582	44030311	rs17650651	0.96339	rs7207582	G	T	0.00623557	4.47629	7.595e-06	-4.9832	6.254e-07	MAPT	0	intronic	0.182	6	5	14	1	1	1
17	17	44210933	rs7207582	44030773	rs62062805	0.96339	rs7207582	G	A	0.00601298	4.48627	7.248e-06	-4.87794	1.072e-06	MAPT	0	intronic	1.312	3a	5	14	1	1	1
17	17	44210933	rs7207582	44031420	rs62062806	0.96339	rs7207582	A	G	0.00608007	4.48321	7.353e-06	-4.81732	1.455e-06	MAPT	0	intronic	0.874	5	5	14	1	1	1
17	17	44210933	rs7207582	44031540	rs55978005	0.96339	rs7207582	T	G	0.0062253	4.47669	7.581e-06	-4.89561	9.8e-07	MAPT	0	intronic	3.192	3a	5	14	1	1	1
17	17	44210933	rs7207582	44031946	rs55946323	0.95829	rs7207582	G	A	0.00632353	4.47292	7.716e-06	-4.85981	1.175e-06	MAPT	0	intronic	0.288	7	5	14	1	1	1
17	17	44210933	rs7207582	44032073	rs56317731	0.96339	rs7207582	G	A	0.00612113	4.48133	7.418e-06	-4.87794	1.072e-06	MAPT	0	intronic	0.193	7	5	14	1	1	1
17	17	44210933	rs7207582	44032597	rs56080482	0.96339	rs7207582	A	G	0.0062253	4.47669	7.581e-06	-4.87812	1.071e-06	MAPT	0	intronic	1.175	3a	5	14	1	1	1
17	17	44210933	rs7207582	44032768	rs17571718	0.96339	rs7207582	C	T	0.0057277	4.49929	6.818e-06	-4.95979	7.057e-07	MAPT	0	intronic	10.31	1f	5	14	1	1	1
17	17	44210933	rs7207582	44032879	rs78555354	0.96339	rs7207582	G	A	0.00619041	4.47816	7.529e-06	-4.81554	1.468e-06	MAPT	0	intronic	9.257		5	14	1	1	1
17	17	44210933	rs7207582	44032915	rs17571739	0.96339	rs7207582	C	T	0.00569199	4.50092	6.766e-06	-4.95425	7.261e-07	MAPT	0	intronic	4.096		5	14	1	1	1
17	17	44210933	rs7207582	44032956	rs62062813	0.96339	rs7207582	A	G	0.00618669	4.47833	7.523e-06	-4.85318	1.215e-06	MAPT	0	intronic	2.416	4	5	14	1	1	1
17	17	44210933	rs7207582	44033002	rs62063262	0.96339	rs7207582	C	T	0.00619041	4.47816	7.529e-06	-4.84408	1.272e-06	MAPT	0	intronic	0.745	2b	5	14	1	1	1
17	17	44210933	rs7207582	44033132	rs113520245	0.96339	rs7207582	T	C	0.00633722	4.47239	7.735e-06	-4.67637	2.92e-06	MAPT	0	intronic	5.11	6	5	14	1	1	1
17	17	44210933	rs7207582	44033169	rs113277432	0.96339	rs7207582	C	T	0.00619041	4.47816	7.529e-06	-4.74317	2.104e-06	MAPT	0	intronic	3.744	6	5	14	1	1	1
17	17	44210933	rs7207582	44033188	rs112950348	0.96339	rs7207582	A	G	0.00618669	4.47833	7.523e-06	-4.78172	1.738e-06	MAPT	0	intronic	3.268	7	5	14	1	1	1
17	17	44210933	rs7207582	44033401	rs62063264	0.96339	rs7207582	T	C	0.0062253	4.47669	7.581e-06	-4.83269	1.347e-06	MAPT	0	intronic	2.04	7	5	14	1	1	1
17	17	44210933	rs7207582	44033468	rs62063265	0.96339	rs7207582	A	G	0.00633722	4.47239	7.735e-06	-4.87178	1.106e-06	MAPT	0	intronic	1.207	5	5	14	1	1	1
17	17	44210933	rs7207582	44033488	rs62063266	0.96339	rs7207582	T	C	0.0062253	4.47669	7.581e-06	-4.87574	1.084e-06	MAPT	0	intronic	3.931	5	5	14	1	1	1
17	17	44210933	rs7207582	44033802	rs17571781	0.96339	rs7207582	C	T	0.00633434	4.4725	7.731e-06	-4.98336	6.249e-07	MAPT	0	intronic	1.62	1d	5	14	1	1	1
17	17	44210933	rs7207582	44034833	rs62063269	0.96339	rs7207582	A	G	0.00646031	4.46766	7.908e-06	-4.77692	1.78e-06	MAPT	0	intronic	2.361	5	5	14	1	1	1
17	17	44210933	rs7207582	44034859	rs17571809	0.96339	rs7207582	G	A	0.00646312	4.46755	7.912e-06	-4.95377	7.279e-07	MAPT	0	intronic	7.235	1f	5	14	1	1	1
17	17	44210933	rs7207582	44035367	rs17650771	0.96339	rs7207582	G	A	0.0065455	4.46438	8.03e-06	-4.97328	6.583e-07	MAPT	0	intronic	6.031	1f	5	14	1	1	1
17	17	44210933	rs7207582	44035516	rs77555455	0.96339	rs7207582	A	G	0.00646031	4.46766	7.908e-06	-4.90265	9.455e-07	MAPT	0	intronic	8.93	5	5	14	1	1	1
17	17	44210933	rs7207582	44035706	rs17571857	0.96339	rs7207582	G	A	0.00581916	4.49512	6.953e-06	-4.99051	6.022e-07	MAPT	0	intronic	10.51	1f	5	14	1	1	1
17	17	44210933	rs7207582	44036047	rs62063271	0.96339	rs7207582	A	G	0.00762295	4.42318	9.726e-06	-4.8716	1.107e-06	MAPT	0	intronic	2.11	5	5	14	1	1	1
17	17	44210933	rs7207582	44036287	rs62063275	0.96339	rs7207582	G	A	0.00662805	4.46121	8.15e-06	-4.87942	1.064e-06	MAPT	0	intronic	2.624	7	5	14	1	1	1
17	17	44210933	rs7207582	44036408	rs62063276	0.958195	rs7207582	G	T	0.00952332	4.36247	1.286e-05	-4.82373	1.409e-06	MAPT	0	intronic	0.482	6	5	14	1	1	1
17	17	44210933	rs7207582	44036787	rs17650818	0.96339	rs7207582	C	T	0.00671477	4.45787	8.278e-06	-4.97672	6.467e-07	MAPT	0	intronic	3.878	1f	5	14	1	1	1
17	17	44210933	rs7207582	44036914	rs62063278	0.96339	rs7207582	T	C	0.00675629	4.45626	8.34e-06	-4.91897	8.7e-07	MAPT	0	intronic	4.812	5	5	14	1	1	1
17	17	44210933	rs7207582	44036936	rs62063279	0.96339	rs7207582	A	G	0.00675629	4.45626	8.34e-06	-4.9138	8.933e-07	MAPT	0	intronic	4.112	6	5	14	1	1	1
17	17	44210933	rs7207582	44037079	rs113793114	0.96339	rs7207582	A	G	0.00675629	4.45626	8.34e-06	-4.83657	1.321e-06	MAPT	0	intronic	0.685	7	5	14	1	1	1
17	17	44210933	rs7207582	44037491	rs17650842	0.96339	rs7207582	G	A	0.00681735	4.45391	8.432e-06	-4.93435	8.042e-07	MAPT	0	intronic	2.766	6	5	14	1	1	1
17	17	44210933	rs7207582	44038785	rs62063281	0.952492	rs7207582	G	A	0.00687969	4.45151	8.527e-06	-4.8772	1.076e-06	MAPT	0	intronic	4.648	5	5	14	1	1	1
17	17	44210933	rs7207582	44039008	rs17650860	0.968522	rs7207582	A	G	0.00598587	4.48751	7.206e-06	-4.80365	1.558e-06	MAPT	0	intronic	1.42	1f	5	14	1	1	1
17	17	44210933	rs7207582	44039043	rs62063282	0.968522	rs7207582	A	G	0.00665597	4.46013	8.191e-06	-4.8501	1.234e-06	MAPT	0	intronic	0.345	7	5	14	1	1	1
17	17	44210933	rs7207582	44039410	rs111520035	0.963308	rs7207582	G	A	0.00662873	4.46118	8.151e-06	-4.83005	1.365e-06	MAPT	0	intronic	5.088	5	4	14	1	1	1
17	17	44210933	rs7207582	44039516	rs17650872	0.968522	rs7207582	T	G	0.00690704	4.45045	8.569e-06	-5.00796	5.501e-07	MAPT	0	intronic	0.061	1f	4	14	1	1	1
17	17	44210933	rs7207582	44039691	rs17650901	0.968522	rs7207582	G	A	0.00669322	4.4587	8.246e-06	-5.03474	4.785e-07	MAPT	0	UTR5	9.079	1f	4	14	1	1	1
17	17	44210933	rs7207582	44040120	rs55780945	0.968522	rs7207582	T	C	0.00674093	4.45686	8.317e-06	-4.91872	8.711e-07	MAPT	0	intronic	2.309	7	4	14	1	1	0
17	17	44210933	rs7207582	44040823	rs55711941	0.968522	rs7207582	T	C	0.00678358	4.45521	8.381e-06	-4.83432	1.336e-06	MAPT	0	intronic	1.243	5	4	14	1	1	0
17	17	44210933	rs7207582	44041101	rs55709241	0.968522	rs7207582	C	T	0.00685877	4.45231	8.495e-06	-4.59373	4.354e-06	MAPT	0	intronic	9.367	5	4	14	1	1	0
17	17	44210933	rs7207582	44041107	rs56280951	0.968522	rs7207582	A	G	0.00682592	4.45358	8.445e-06	-4.68366	2.818e-06	MAPT	0	intronic	8.904	5	4	14	1	1	0
17	17	44210933	rs7207582	44041562	rs112058117	0.968522	rs7207582	T	G	0.0062888	4.47425	7.668e-06	-4.61521	3.927e-06	MAPT	0	intronic	1.078	2b	4	14	1	1	0
17	17	44210933	rs7207582	44041817	rs112206871	0.968522	rs7207582	G	A	0.00681735	4.45391	8.432e-06	-4.88091	1.056e-06	MAPT	0	intronic	0.07	6	4	14	1	1	0
17	17	44210933	rs7207582	44042221	rs56166491	0.968522	rs7207582	G	A	0.00697609	4.44779	8.676e-06	-4.88053	1.058e-06	MAPT	0	intronic	0.606	5	4	14	1	1	0
17	17	44210933	rs7207582	44042361	rs56226437	0.968522	rs7207582	C	T	0.00681735	4.45391	8.432e-06	-4.79423	1.633e-06	MAPT	0	intronic	4.613	5	4	14	1	1	0
17	17	44210933	rs7207582	44042366	rs55907036	0.968522	rs7207582	A	G	0.00682592	4.45358	8.445e-06	-4.81911	1.442e-06	MAPT	0	intronic	3.572	5	4	14	1	1	0
17	17	44210933	rs7207582	44042783	rs56294117	0.968522	rs7207582	A	G	0.00682592	4.45358	8.445e-06	-4.88851	1.016e-06	MAPT	0	intronic	3.419	7	4	14	1	1	0
17	17	44210933	rs7207582	44042868	rs112415880	0.968522	rs7207582	A	G	0.00682592	4.45358	8.445e-06	-4.88659	1.026e-06	MAPT	0	intronic	0.169	6	4	14	1	1	0
17	17	44210933	rs7207582	44043378	rs62063291	0.968522	rs7207582	C	T	0.00681735	4.45391	8.432e-06	-4.85236	1.22e-06	MAPT	0	intronic	6.649	5	2	14	1	1	0
17	17	44210933	rs7207582	44043636	rs62063292	0.968522	rs7207582	T	C	0.00682592	4.45358	8.445e-06	-4.90162	9.505e-07	MAPT	0	intronic	10.8	6	2	14	1	1	0
17	17	44210933	rs7207582	44043819	rs62063293	0.968522	rs7207582	A	G	0.00682592	4.45358	8.445e-06	-4.87	1.116e-06	MAPT	0	intronic	2.853	7	2	14	1	1	0
17	17	44210933	rs7207582	44044157	rs62063294	0.963144	rs7207582	A	G	0.0102446	4.34214	1.411e-05	-4.88735	1.022e-06	MAPT	0	intronic	0.858	6	5	14	1	1	0
17	17	44210933	rs7207582	44044431	rs62063295	0.968522	rs7207582	T	C	0.00682592	4.45358	8.445e-06	-4.91958	8.673e-07	MAPT	0	intronic	16.2	5	5	14	1	1	0
17	17	44210933	rs7207582	44044508	rs17650991	0.968522	rs7207582	C	A	0.00685877	4.45231	8.495e-06	-4.93251	8.118e-07	MAPT	0	intronic	0.907	1f	5	14	1	1	0
17	17	44210933	rs7207582	44044940	rs113857334	0.968522	rs7207582	C	T	0.00685877	4.45231	8.495e-06	-4.89385	9.888e-07	MAPT	0	intronic	1.151	5	2	15	1	1	0
17	17	44210933	rs7207582	44044985	rs17572147	0.968522	rs7207582	G	A	0.00685877	4.45231	8.495e-06	-5.02437	5.051e-07	MAPT	0	intronic	0.292	1f	2	15	1	1	0
17	17	44210933	rs7207582	44045474	rs77513497	0.968522	rs7207582	G	A	0.00685877	4.45231	8.495e-06	-4.8841	1.039e-06	MAPT	0	intronic	3.319	6	4	15	1	1	0
17	17	44210933	rs7207582	44045974	rs17572169	0.968522	rs7207582	T	C	0.00682592	4.45358	8.445e-06	-4.99873	5.771e-07	MAPT	0	intronic	8.627	1f	4	14	1	1	0
17	17	44210933	rs7207582	44046202	rs62063296	0.968522	rs7207582	T	C	0.00686859	4.45193	8.51e-06	-4.86389	1.151e-06	MAPT	0	intronic	4.191	7	4	14	1	1	0
17	17	44210933	rs7207582	44047216	rs62641967	0.968522	rs7207582	G	T	0.00685877	4.45231	8.495e-06	-4.85796	1.186e-06	MAPT	0	intronic	10.09	6	4	14	1	1	0
17	17	44210933	rs7207582	44047609	rs74373419	0.968522	rs7207582	T	C	0.00686859	4.45193	8.51e-06	-4.91571	8.846e-07	MAPT	0	intronic	0.488	6	4	14	1	1	0
17	17	44210933	rs7207582	44048323	rs62063298	0.968522	rs7207582	T	G	0.00686859	4.45193	8.51e-06	-4.95043	7.405e-07	MAPT	0	intronic	3.761	5	4	15	1	1	0
17	17	44210933	rs7207582	44048336	rs62063299	0.968522	rs7207582	C	T	0.00685877	4.45231	8.495e-06	-5.03243	4.843e-07	MAPT	0	intronic	0.719	5	4	15	1	1	0
17	17	44210933	rs7207582	44048350	rs62063300	0.968522	rs7207582	C	T	0.00685877	4.45231	8.495e-06	-4.99956	5.746e-07	MAPT	0	intronic	6.64	4	4	15	1	1	0
17	17	44210933	rs7207582	44049133	rs62063303	0.968522	rs7207582	C	T	0.00690444	4.45055	8.565e-06	-4.90084	9.543e-07	MAPT	0	intronic	6.347	4	4	15	1	1	0
17	17	44210933	rs7207582	44049329	rs75242405	0.968522	rs7207582	T	C	0.00701827	4.44616	8.742e-06	-4.90569	9.31e-07	MAPT	0	intronic	6.732	2b	2	15	1	1	0
17	17	44210933	rs7207582	44049550	rs17651093	0.968522	rs7207582	A	G	0.0072873	4.43576	9.175e-06	-4.971	6.661e-07	MAPT	0	intronic	1.193	1f	4	15	1	1	0
17	17	44210933	rs7207582	44049867	rs17572248	0.968522	rs7207582	G	A	0.00706328	4.44442	8.813e-06	-4.98311	6.257e-07	MAPT	0	intronic	10.55	1f	4	15	1	1	0
17	17	44210933	rs7207582	44049900	rs62063304	0.968522	rs7207582	G	A	0.00681735	4.45391	8.432e-06	-4.89085	1.004e-06	MAPT	0	intronic	7.879	4	4	15	1	1	0
17	17	44210933	rs7207582	44050282	rs62063305	0.968522	rs7207582	A	G	0.00693748	4.44928	8.616e-06	-4.86321	1.155e-06	MAPT	0	UTR5	5.25	4	4	15	1	1	0
17	17	44210933	rs7207582	44050340	rs17651134	0.968522	rs7207582	A	G	0.00737157	4.43249	9.315e-06	-5.00319	5.639e-07	MAPT	0	UTR5	4.213	1f	4	15	1	1	0
17	17	44210933	rs7207582	44050395	rs62063306	0.968522	rs7207582	A	C	0.00706076	4.44452	8.809e-06	-4.88016	1.06e-06	MAPT	0	UTR5	2.321	5	4	15	1	1	0
17	17	44210933	rs7207582	44050463	rs62063774	0.968522	rs7207582	C	T	0.00737396	4.4324	9.319e-06	-4.87447	1.091e-06	MAPT	0	UTR5	1.914	5	4	15	1	1	0
17	17	44210933	rs7207582	44050823	rs62063775	0.968522	rs7207582	T	G	0.00706076	4.44452	8.809e-06	-4.84994	1.235e-06	MAPT	0	UTR5	3.449	2b	4	15	1	1	0
17	17	44210933	rs7207582	44050850	rs62063776	0.968522	rs7207582	G	A	0.00694587	4.44895	8.629e-06	-4.88988	1.009e-06	MAPT	0	UTR5	6.207	4	4	15	1	1	0
17	17	44210933	rs7207582	44051589	rs118087478	0.968522	rs7207582	G	T	0.00694587	4.44895	8.629e-06	-4.64281	3.437e-06	MAPT	0	UTR5	5.936	4	2	15	1	1	0
17	17	44210933	rs7207582	44051612	rs77875796	0.968522	rs7207582	G	A	0.00694587	4.44895	8.629e-06	-4.6406	3.474e-06	MAPT	0	UTR5	10.81	4	2	15	1	1	0
17	17	44210933	rs7207582	44051846	rs1800547	0.968522	rs7207582	G	A	0.00677628	4.45549	8.37e-06	-4.98314	6.256e-07	MAPT	0	UTR5	11.88	1f	3	15	1	1	0
17	17	44210933	rs7207582	44051924	rs17651213	0.968522	rs7207582	A	G	0.00748043	4.42827	9.499e-06	-4.99102	6.006e-07	MAPT	0	UTR5	3.224	1f	3	15	1	1	0
17	17	44210933	rs7207582	44052009	rs17572361	0.968522	rs7207582	C	T	0.00758211	4.42451	9.666e-06	-5.02662	4.992e-07	MAPT	0	UTR5	5.87	1f	3	15	1	1	0
17	17	44210933	rs7207582	44052284	rs17651243	0.968522	rs7207582	A	G	0.00706076	4.44452	8.809e-06	-5.00954	5.456e-07	MAPT	0	UTR5	0.92	1f	2	15	1	1	0
17	17	44210933	rs7207582	44052733	rs78104015	0.968522	rs7207582	G	A	0.00694587	4.44895	8.629e-06	-4.8889	1.014e-06	MAPT	0	UTR5	0.474	4	4	15	1	1	0
17	17	44210933	rs7207582	44053171	rs62063777	0.968522	rs7207582	G	A	0.00694587	4.44895	8.629e-06	-4.85123	1.227e-06	MAPT	0	UTR5	1.105	5	4	15	1	1	0
17	17	44210933	rs7207582	44053448	rs2217394	0.968522	rs7207582	G	A	0.00698763	4.44734	8.694e-06	-4.98314	6.256e-07	MAPT	0	UTR5	3.552	1f	4	15	1	1	0
17	17	44210933	rs7207582	44053989	rs62063778	0.968522	rs7207582	A	G	0.00706076	4.44452	8.809e-06	-4.85498	1.204e-06	MAPT	0	UTR5	8.92	7	4	15	1	1	0
17	17	44210933	rs7207582	44054237	rs17651285	0.968522	rs7207582	A	G	0.00706076	4.44452	8.809e-06	-4.96103	7.012e-07	MAPT	0	UTR5	0.752	1f	2	15	1	1	0
17	17	44210933	rs7207582	44054388	rs17572467	0.968522	rs7207582	C	T	0.00698763	4.44734	8.694e-06	-4.98203	6.292e-07	MAPT	0	UTR5	0.949	1f	2	15	1	1	0
17	17	44210933	rs7207582	44054596	rs17572495	0.968522	rs7207582	G	T	0.00698763	4.44734	8.694e-06	-4.98598	6.165e-07	MAPT	0	UTR5	2.914	1a	2	15	1	1	0
17	17	44210933	rs7207582	44054671	rs62063779	0.968522	rs7207582	T	C	0.00716279	4.44057	8.972e-06	-4.86133	1.166e-06	MAPT	0	UTR5	2.739	4	2	15	1	1	0
17	17	44210933	rs7207582	44056238	rs62063780	0.968522	rs7207582	G	A	0.00710418	4.44284	8.878e-06	-4.79782	1.604e-06	MAPT	0	intronic	4.932	7	4	15	1	1	0
17	17	44210933	rs7207582	44056433	rs2163129	0.968522	rs7207582	C	T	0.00710418	4.44284	8.878e-06	-4.91478	8.888e-07	MAPT	0	intronic	4.81	6	4	15	1	1	0
17	17	44210933	rs7207582	44056434	rs2163130	0.968522	rs7207582	A	G	0.00706076	4.44452	8.809e-06	-4.93088	8.186e-07	MAPT	0	intronic	0.036	6	4	15	1	1	0
17	17	44210933	rs7207582	44056767	rs1981997	0.968522	rs7207582	A	G	0.00672551	4.45745	8.294e-06	-5.01281	5.364e-07	MAPT	0	intronic	6.018	1f	4	15	1	1	0
17	17	44210933	rs7207582	44056833	rs1981998	0.968522	rs7207582	A	G	0.00706076	4.44452	8.809e-06	-5.01217	5.382e-07	MAPT	0	intronic	0.89	1f	4	15	1	1	0
17	17	44210933	rs7207582	44057595	rs3785884	0.917211	rs7207582	A	G	0.00499533	4.56647	4.96e-06	-4.63462	3.576e-06	MAPT	0	intronic	0.037	5	4	15	1	1	0
17	17	44210933	rs7207582	44058004	rs17572613	0.968522	rs7207582	G	A	0.00714539	4.44124	8.944e-06	-4.98126	6.317e-07	MAPT	0	intronic	3.211		4	15	1	1	0
17	17	44210933	rs7207582	44058017	rs77527347	0.963144	rs7207582	T	G	0.00773596	4.41948	9.894e-06	-4.8841	1.039e-06	MAPT	0	intronic	0.452	5	4	15	1	1	0
17	17	44210933	rs7207582	44058861	rs17651483	0.968522	rs7207582	A	C	0.00697994	4.44764	8.682e-06	-5.00159	5.686e-07	MAPT	0	intronic	2.179	1f	4	15	1	1	0
17	17	44210933	rs7207582	44059215	rs62063783	0.968522	rs7207582	T	C	0.00710292	4.44289	8.876e-06	-4.83373	1.34e-06	MAPT	0	intronic	2.322	5	4	15	1	1	0
17	17	44210933	rs7207582	44059775	rs62063784	0.968522	rs7207582	G	A	0.00714539	4.44124	8.944e-06	-4.84424	1.271e-06	MAPT	0	intronic	9.326	5	4	15	1	1	0
17	17	44210933	rs7207582	44060248	rs56234850	0.968522	rs7207582	A	G	0.00706076	4.44452	8.809e-06	-4.88774	1.02e-06	MAPT	0	intronic	2.423	5	4	15	1	1	0
17	17	44210933	rs7207582	44060775	rs63750417	0.968522	rs7207582	T	C	0.00689468	4.45093	8.55e-06	-4.7823	1.733e-06	MAPT	0	exonic	11.85	5	4	15	1	1	0
17	17	44210933	rs7207582	44061023	rs62063786	0.968522	rs7207582	A	G	0.00692195	4.44988	8.592e-06	-4.81004	1.509e-06	MAPT	0	exonic	7.864	5	4	15	1	1	0
17	17	44210933	rs7207582	44061036	rs62063787	0.968522	rs7207582	C	T	0.00681801	4.45389	8.433e-06	-4.81244	1.491e-06	MAPT	0	exonic	0.172	5	4	15	1	1	0
17	17	44210933	rs7207582	44061278	rs17651549	0.968522	rs7207582	T	C	0.00747339	4.42855	9.487e-06	-5.00071	5.712e-07	MAPT	0	exonic	26.8	1f	4	15	1	1	0
17	17	44210933	rs7207582	44065410	rs10445371	0.968522	rs7207582	A	G	0.0070386	4.44537	8.774e-06	-5.00532	5.577e-07	MAPT	0	intronic	5.075	1f	4	15	1	1	0
17	17	44210933	rs7207582	44065740	rs919462	0.968522	rs7207582	T	C	0.0070386	4.44537	8.774e-06	-4.90322	9.428e-07	MAPT	0	intronic	3.678	5	4	15	1	1	0
17	17	44210933	rs7207582	44065901	rs919464	0.968522	rs7207582	T	C	0.0070386	4.44537	8.774e-06	-4.95406	7.268e-07	MAPT	0	intronic	0.141	1b	2	15	1	1	0
17	17	44210933	rs7207582	44066172	rs112385572	0.968522	rs7207582	G	A	0.00693424	4.4494	8.611e-06	-4.89993	9.587e-07	MAPT	0	intronic	7.407	5	4	15	1	1	0
17	17	44210933	rs7207582	44066995	rs113134013	0.968522	rs7207582	T	C	0.0070386	4.44537	8.774e-06	-4.95318	7.301e-07	MAPT	0	intronic	0.049	7	4	15	1	1	0
17	17	44210933	rs7207582	44067046	rs76357066	0.968522	rs7207582	A	G	0.0070386	4.44537	8.774e-06	-4.88929	1.012e-06	MAPT	0	intronic	0.454	5	4	15	1	1	0
17	17	44210933	rs7207582	44067400	rs10445337	0.968522	rs7207582	C	T	0.00759507	4.42409	9.685e-06	-4.88639	1.027e-06	MAPT	0	exonic	19.15	1f	4	15	1	1	0
17	17	44210933	rs7207582	44067508	rs79447161	0.968522	rs7207582	G	A	0.00693424	4.4494	8.611e-06	-4.90823	9.19e-07	MAPT	0	intronic	0.369	5	4	15	1	1	0
17	17	44210933	rs7207582	44067546	rs17651754	0.968522	rs7207582	C	T	0.00693424	4.4494	8.611e-06	-5.02505	5.033e-07	MAPT	0	intronic	5.747	1f	4	15	1	1	0
17	17	44210933	rs7207582	44067682	rs10445338	0.968522	rs7207582	A	G	0.00685287	4.45254	8.486e-06	-5.03594	4.755e-07	MAPT	0	intronic	0.413	1f	4	15	1	1	0
17	17	44210933	rs7207582	44067831	rs111652694	0.968522	rs7207582	C	T	0.00693424	4.4494	8.611e-06	-4.87483	1.089e-06	MAPT	0	intronic	5.218	7	4	15	1	1	0
17	17	44210933	rs7207582	44068238	rs62063795	0.963144	rs7207582	T	C	0.00715037	4.44105	8.952e-06	-4.8573	1.19e-06	MAPT	0	intronic	0.276	4	4	15	1	1	0
17	17	44210933	rs7207582	44068289	rs62063796	0.963144	rs7207582	A	G	0.0059794	4.48781	7.196e-06	-4.90613	9.289e-07	MAPT	0	intronic	1.012	4	4	15	1	1	0
17	17	44210933	rs7207582	44068480	rs77290642	0.968522	rs7207582	C	T	0.00693424	4.4494	8.611e-06	-4.88988	1.009e-06	MAPT	0	intronic	6.396		4	15	1	1	0
17	17	44210933	rs7207582	44068481	rs76618565	0.968522	rs7207582	A	G	0.0070386	4.44537	8.774e-06	-4.90073	9.548e-07	MAPT	0	intronic	0.325		4	15	1	1	0
17	17	44210933	rs7207582	44068543	rs62063798	0.968522	rs7207582	A	G	0.0070386	4.44537	8.774e-06	-4.86082	1.169e-06	MAPT	0	intronic	0.487	3a	4	15	1	1	0
17	17	44210933	rs7207582	44068924	rs1052551	0.968522	rs7207582	A	G	0.00682658	4.45356	8.446e-06	-5.01057	5.427e-07	MAPT	0	exonic	1.881	5	4	15	1	1	0
17	17	44210933	rs7207582	44069198	rs62063800	0.968522	rs7207582	T	C	0.00695424	4.44863	8.642e-06	-4.89007	1.008e-06	MAPT	0	intronic	3.618	6	4	15	1	1	0
17	17	44210933	rs7207582	44069687	rs17651857	0.968522	rs7207582	G	A	0.00693424	4.4494	8.611e-06	-4.85498	1.204e-06	MAPT	0	intronic	5.666	4	4	15	1	1	0
17	17	44210933	rs7207582	44069768	rs74759276	0.968522	rs7207582	G	A	0.00693424	4.4494	8.611e-06	-4.89125	1.002e-06	MAPT	0	intronic	4.865	3a	4	15	1	1	0
17	17	44210933	rs7207582	44069840	rs17651887	0.968522	rs7207582	A	G	0.0070386	4.44537	8.774e-06	-4.88813	1.018e-06	MAPT	0	intronic	6.283	4	4	15	1	1	0
17	17	44210933	rs7207582	44070545	rs55662347	0.968522	rs7207582	A	G	0.00697994	4.44764	8.682e-06	-4.89485	9.838e-07	MAPT	0	intronic	0.128	2b	4	15	1	1	1
17	17	44210933	rs7207582	44071294	rs62063845	0.968522	rs7207582	C	T	0.00693424	4.4494	8.611e-06	-4.85449	1.207e-06	MAPT	0	exonic	2.018	5	4	15	1	1	1
17	17	44210933	rs7207582	44071674	rs62063846	0.968522	rs7207582	G	A	0.00693424	4.4494	8.611e-06	-4.85285	1.217e-06	MAPT	0	intronic	4.222	2b	4	15	1	1	1
17	17	44210933	rs7207582	44072017	rs55736025	0.968522	rs7207582	A	C	0.00699658	4.44699	8.708e-06	-4.86201	1.162e-06	MAPT	0	intronic	7.965	7	4	15	1	1	1
17	17	44210933	rs7207582	44072423	rs75944932	0.968522	rs7207582	C	A	0.00689338	4.45098	8.548e-06	-4.89105	1.003e-06	MAPT	0	intronic	0.085	6	4	15	1	1	1
17	17	44210933	rs7207582	44072854	rs17573245	0.963144	rs7207582	C	T	0.00603993	4.48504	7.29e-06	-4.83793	1.312e-06	MAPT	0	intronic	4.937	5	4	15	1	1	1
17	17	44210933	rs7207582	44072984	rs112572874	0.968522	rs7207582	G	A	0.00681074	4.45417	8.422e-06	-4.72546	2.296e-06	MAPT	0	intronic	5.348	5	4	15	1	1	1
17	17	44210933	rs7207582	44073027	rs17652036	0.968522	rs7207582	A	G	0.00691158	4.45028	8.576e-06	-5.03651	4.741e-07	MAPT	0	intronic	5.071	1f	4	15	1	1	1
17	17	44210933	rs7207582	44073062	rs62063849	0.968522	rs7207582	G	T	0.00681074	4.45417	8.422e-06	-4.88297	1.045e-06	MAPT	0	intronic	0.769	5	4	15	1	1	1
17	17	44210933	rs7207582	44073739	rs62063850	0.963144	rs7207582	A	G	0.00686859	4.45193	8.51e-06	-4.87321	1.098e-06	MAPT	0	intronic	15.23	5	4	15	1	1	1
17	17	44210933	rs7207582	44073889	rs1052553	0.963144	rs7207582	G	A	0.00621649	4.47703	7.569e-06	-5.0073	5.52e-07	MAPT	0	exonic	12.06	1f	4	15	1	1	1
17	17	44210933	rs7207582	44073973	rs17652121	0.968522	rs7207582	C	T	0.00693424	4.4494	8.611e-06	-4.95825	7.113e-07	MAPT	0	exonic	19.13	1f	4	15	1	1	1
17	17	44210933	rs7207582	44074581	rs62063852	0.968522	rs7207582	G	A	0.00672283	4.45755	8.29e-06	-4.85252	1.219e-06	MAPT	0	intronic	2.512	5	4	15	1	1	1
17	17	44210933	rs7207582	44074613	rs62063853	0.968522	rs7207582	G	A	0.00672283	4.45755	8.29e-06	-4.89105	1.003e-06	MAPT	0	intronic	0.759	5	4	15	1	1	1
17	17	44210933	rs7207582	44074619	rs62063854	0.968522	rs7207582	A	G	0.00678425	4.45519	8.382e-06	-4.84898	1.241e-06	MAPT	0	intronic	8.726	5	4	15	1	1	1
17	17	44210933	rs7207582	44075099	rs2004673	0.968522	rs7207582	C	T	0.00668173	4.45914	8.229e-06	-4.60418	4.141e-06	MAPT	0	intronic	2.427	4	4	15	1	1	1
17	17	44210933	rs7207582	44075535	rs62063855	0.968522	rs7207582	C	T	0.00668173	4.45914	8.229e-06	-4.59936	4.238e-06	MAPT	0	intronic	1.997	5	4	15	1	1	1
17	17	44210933	rs7207582	44075837	rs1078269	0.968522	rs7207582	C	T	0.00668173	4.45914	8.229e-06	-4.66588	3.073e-06	MAPT	0	intronic	5.011	5	4	15	1	1	1
17	17	44210933	rs7207582	44075901	rs1078268	0.968522	rs7207582	G	A	0.00579764	4.4961	6.921e-06	-4.78699	1.693e-06	MAPT	0	intronic	0.349	1f	4	15	1	1	1
17	17	44210933	rs7207582	44076466	rs62063856	0.968522	rs7207582	G	A	0.00668173	4.45914	8.229e-06	-4.73165	2.227e-06	MAPT	0	intronic	0.372	5	4	15	1	1	1
17	17	44210933	rs7207582	44076665	rs62063857	0.968522	rs7207582	G	A	0.00586456	4.49305	7.021e-06	-4.75383	1.996e-06	MAPT:STH	0:0	exonic	1.506	7	4	15	1	1	1
17	17	44210933	rs7207582	44077708	rs79959255	0.968522	rs7207582	T	G	0.00668241	4.45911	8.23e-06	-4.75061	2.028e-06	MAPT	0	intronic	1.762	5	4	15	1	1	1
17	17	44210933	rs7207582	44077850	rs56301633	0.968522	rs7207582	A	G	0.00816274	4.45911	8.23e-06	-4.47411	7.673e-06	MAPT	0	intronic	1.269	5	4	15	1	1	1
17	17	44210933	rs7207582	44078616	rs62063859	0.968522	rs7207582	A	G	0.00672551	4.45745	8.294e-06	-4.73385	2.203e-06	MAPT	0	intronic	1.461	7	4	15	1	1	1
17	17	44210933	rs7207582	44078832	rs62064660	0.963144	rs7207582	A	G	0.00638949	4.47038	7.808e-06	-4.77999	1.753e-06	MAPT	0	intronic	0.651	6	4	15	1	1	1
17	17	44210933	rs7207582	44078892	rs62064661	0.968522	rs7207582	A	G	0.00661369	4.46176	8.129e-06	-4.7657	1.882e-06	MAPT	0	intronic	0.024	7	4	15	1	1	1
17	17	44210933	rs7207582	44079567	rs17573447	0.957995	rs7207582	T	C	0.00859527	4.39125	1.127e-05	-4.76591	1.88e-06	MAPT	0	intronic	1.72	4	4	15	1	1	1
17	17	44210933	rs7207582	44079721	rs62064662	0.968522	rs7207582	G	A	0.00656418	4.46366	8.057e-06	-4.77523	1.795e-06	MAPT	0	intronic	0.708	5	2	15	1	1	1
17	17	44210933	rs7207582	44080039	rs62064663	0.968522	rs7207582	G	T	0.00660547	4.46207	8.117e-06	-4.75823	1.953e-06	MAPT	0	intronic	6.574	2b	2	15	1	1	0
17	17	44210933	rs7207582	44081064	rs8070723	0.968522	rs7207582	G	A	0.00638664	4.47049	7.804e-06	-4.85498	1.204e-06	MAPT	0	intronic	1.167	6	2	15	1	1	0
17	17	44210933	rs7207582	44081462	rs62064664	0.968522	rs7207582	C	T	0.00656418	4.46366	8.057e-06	-4.78628	1.699e-06	MAPT	0	intronic	3.736	4	2	15	1	1	0
17	17	44210933	rs7207582	44081527	rs62064665	0.968522	rs7207582	C	T	0.00656418	4.46366	8.057e-06	-4.75751	1.96e-06	MAPT	0	intronic	9.554	4	2	15	1	1	0
17	17	44210933	rs7207582	44082181	rs111324579	0.968522	rs7207582	G	A	0.0065462	4.46436	8.031e-06	-4.74384	2.097e-06	MAPT	0	intronic	0.582	7	5	15	1	1	0
17	17	44210933	rs7207582	44082514	rs62064666	0.968522	rs7207582	C	T	0.00669322	4.4587	8.246e-06	-4.81966	1.438e-06	MAPT	0	intronic	2.804	6	5	15	1	1	0
17	17	44210933	rs7207582	44082603	rs17573593	0.968522	rs7207582	C	A	0.0066519	4.46029	8.185e-06	-4.85285	1.217e-06	MAPT	0	intronic	0.541	1f	4	15	1	1	0
17	17	44210933	rs7207582	44082981	rs62064668	0.968522	rs7207582	A	G	0.00681008	4.45419	8.421e-06	-4.71628	2.402e-06	MAPT	0	intronic	2.042	6	4	15	1	1	0
17	17	44210933	rs7207582	44083081	rs17573607	0.96339	rs7207582	A	G	0.0060661	4.48384	7.331e-06	-4.81704	1.457e-06	MAPT	0	intronic	2.458	6	4	15	1	1	0
17	17	44210933	rs7207582	44083323	rs17652337	0.952492	rs7207582	T	C	0.00591018	4.49097	7.09e-06	-4.75413	1.993e-06	MAPT	0	intronic	7.67	6	4	15	1	1	0
17	17	44210933	rs7207582	44083402	rs1991556	0.947346	rs7207582	A	G	0.0106473	4.33075	1.486e-05	-4.59803	4.265e-06	MAPT	0	intronic	1.265	1f	4	15	1	1	0
17	17	44210933	rs7207582	44084533	rs74829364	0.968522	rs7207582	C	T	0.00685156	4.45259	8.484e-06	-4.65164	3.293e-06	MAPT	0	intronic	6.875		5	15	1	1	0
17	17	44210933	rs7207582	44084676	rs62064669	0.968522	rs7207582	T	C	0.00681008	4.45419	8.421e-06	-4.76634	1.876e-06	MAPT	0	intronic	0.434	7	5	15	1	1	0
17	17	44210933	rs7207582	44086100	rs62064671	0.968522	rs7207582	C	T	0.00685156	4.45259	8.484e-06	-4.70226	2.573e-06	MAPT	0	intronic	3.101	5	5	15	1	1	0
17	17	44210933	rs7207582	44086521	rs62064672	0.968522	rs7207582	A	G	0.00685287	4.45254	8.486e-06	-4.79058	1.663e-06	MAPT	0	intronic	0.097	6	5	15	1	1	0
17	17	44210933	rs7207582	44088772	rs62064674	0.968522	rs7207582	A	C	0.00685287	4.45254	8.486e-06	-4.76516	1.887e-06	MAPT	0	intronic	0.233	6	4	15	1	1	0
17	17	44210933	rs7207582	44088926	rs62064675	0.968522	rs7207582	T	C	0.00685287	4.45254	8.486e-06	-4.74211	2.115e-06	MAPT	0	intronic	0.383	5	4	15	1	1	0
17	17	44210933	rs7207582	44089108	rs76723223	0.957995	rs7207582	C	T	0.00682724	4.45353	8.447e-06	-4.75916	1.944e-06	MAPT	0	intronic	2.927	5	4	15	1	1	0
17	17	44210933	rs7207582	44089563	rs733966	0.968522	rs7207582	T	C	0.00685287	4.45254	8.486e-06	-4.92144	8.591e-07	MAPT	0	intronic	7.158	1f	2	15	1	1	0
17	17	44210933	rs7207582	44089690	rs733967	0.968522	rs7207582	C	T	0.00681008	4.45419	8.421e-06	-4.77737	1.776e-06	MAPT	0	intronic	5.641	4	2	15	1	1	0
17	17	44210933	rs7207582	44089715	rs733968	0.968522	rs7207582	T	C	0.00668241	4.45911	8.23e-06	-4.76861	1.855e-06	MAPT	0	intronic	2.58	5	2	15	1	1	0
17	17	44210933	rs7207582	44089727	rs733969	0.968522	rs7207582	A	G	0.0032526	4.68308	2.826e-06	-4.76948	1.847e-06	MAPT	0	intronic	3.421	5	2	15	1	1	0
17	17	44210933	rs7207582	44089921	rs4283261	0.963308	rs7207582	T	C	0.00639447	4.47019	7.815e-06	-4.77223	1.822e-06	MAPT	0	intronic	2.371	5	2	15	1	1	0
17	17	44210933	rs7207582	44090148	rs75666751	0.968522	rs7207582	C	A	0.00685156	4.45259	8.484e-06	-4.73626	2.177e-06	MAPT	0	intronic	0.598	5	4	15	1	1	1
17	17	44210933	rs7207582	44090236	rs4306559	0.968522	rs7207582	C	T	0.00685156	4.45259	8.484e-06	-4.79337	1.64e-06	MAPT	0	intronic	5.072	5	4	15	1	1	1
17	17	44210933	rs7207582	44090339	rs747152	0.968522	rs7207582	C	T	0.00695746	4.44851	8.647e-06	-4.73766	2.162e-06	MAPT	0	intronic	6.483		4	15	1	1	1
17	17	44210933	rs7207582	44090455	rs12150254	0.968522	rs7207582	C	T	0.00685156	4.45259	8.484e-06	-4.7671	1.869e-06	MAPT	0	intronic	4.815		2	15	1	1	1
17	17	44210933	rs7207582	44090646	rs12150170	0.968522	rs7207582	G	A	0.00685156	4.45259	8.484e-06	-4.87088	1.111e-06	MAPT	0	intronic	5.654	1d	2	15	1	1	1
17	17	44210933	rs7207582	44090685	rs12150515	0.968522	rs7207582	T	G	0.00685287	4.45254	8.486e-06	-4.86614	1.138e-06	MAPT	0	intronic	5.603	1b	2	15	1	1	1
17	17	44210933	rs7207582	44090704	rs62062266	0.968522	rs7207582	G	A	0.00685156	4.45259	8.484e-06	-4.75373	1.997e-06	MAPT	0	intronic	8.798	4	2	15	1	1	1
17	17	44210933	rs7207582	44090796	rs17573858	0.968522	rs7207582	C	T	0.00685156	4.45259	8.484e-06	-4.80391	1.556e-06	MAPT	0	intronic	6.563	1f	2	15	1	1	1
17	17	44210933	rs7207582	44090854	rs62062267	0.968522	rs7207582	T	C	0.00685287	4.45254	8.486e-06	-4.75403	1.994e-06	MAPT	0	intronic	0.042	5	1	15	1	1	1
17	17	44210933	rs7207582	44090858	rs62062268	0.968522	rs7207582	T	C	0.00685287	4.45254	8.486e-06	-4.74863	2.048e-06	MAPT	0	intronic	1.263	5	1	15	1	1	1
17	17	44210933	rs7207582	44091195	rs62062270	0.968522	rs7207582	C	T	0.00672283	4.45755	8.29e-06	-4.73785	2.16e-06	MAPT	0	intronic	3.474	2b	2	15	1	1	1
17	17	44210933	rs7207582	44091724	rs75534191	0.968522	rs7207582	A	G	0.00685287	4.45254	8.486e-06	-4.71789	2.383e-06	MAPT	0	intronic	3.403	5	2	15	1	1	1
17	17	44210933	rs7207582	44091886	rs9891103	1	rs7207582	T	C	0.00461085	4.65671	3.213e-06	-4.66118	3.144e-06	MAPT	0	intronic	2.651	6	5	15	1	1	1
17	17	44210933	rs7207582	44092497	rs12150469	0.968522	rs7207582	C	T	0.00685156	4.45259	8.484e-06	-4.62958	3.664e-06	MAPT	0	intronic	4.992	7	5	15	1	1	1
17	17	44210933	rs7207582	44092801	rs12149995	0.968522	rs7207582	A	G	0.00745694	4.42918	9.459e-06	-4.65429	3.251e-06	MAPT	0	intronic	8.566	6	5	15	1	1	1
17	17	44210933	rs7207582	44093319	rs62062274	0.968522	rs7207582	A	G	0.00685287	4.45254	8.486e-06	-4.77568	1.791e-06	MAPT	0	intronic	5.05	5	1	15	1	1	1
17	17	44210933	rs7207582	44093496	rs62062275	0.968522	rs7207582	G	A	0.00685156	4.45259	8.484e-06	-4.72957	2.25e-06	MAPT	0	intronic	0.094	5	1	15	1	1	1
17	17	44210933	rs7207582	44093627	rs62062276	0.968522	rs7207582	G	A	0.00685156	4.45259	8.484e-06	-4.75454	1.989e-06	MAPT	0	intronic	3.577	6	4	15	1	1	1
17	17	44210933	rs7207582	44093860	rs62062278	0.968522	rs7207582	G	A	0.00685156	4.45259	8.484e-06	-4.75505	1.984e-06	MAPT	0	intronic	3.555	7	5	15	1	1	1
17	17	44210933	rs7207582	44094112	rs62062281	0.968522	rs7207582	G	A	0.00685156	4.45259	8.484e-06	-4.75495	1.985e-06	MAPT	0	intronic	3.381	7	5	15	1	1	1
17	17	44210933	rs7207582	44094374	rs62062282	0.968522	rs7207582	G	A	0.00689338	4.45098	8.548e-06	-4.71602	2.405e-06	MAPT	0	intronic	3.991	5	5	15	1	1	1
17	17	44210933	rs7207582	44094471	rs17652502	0.963144	rs7207582	A	G	0.00740493	4.4312	9.371e-06	-4.86065	1.17e-06	MAPT	0	intronic	2.348	1f	5	15	1	1	1
17	17	44210933	rs7207582	44095055	rs62062283	0.968522	rs7207582	A	C	0.00695424	4.44863	8.642e-06	-4.75423	1.992e-06	MAPT	0	intronic	10.27	6	5	15	1	1	1
17	17	44210933	rs7207582	44095335	rs111976319	0.968522	rs7207582	A	C	0.00745341	4.42932	9.453e-06	-4.74413	2.094e-06	MAPT	0	intronic	2.242	7	5	15	1	1	1
17	17	44210933	rs7207582	44095467	rs58879558	0.917211	rs7207582	C	T	0.00951961	4.55014	5.361e-06	-4.42141	9.806e-06	MAPT	0	intronic	0.422	3a	5	5	1	1	1
17	17	44210933	rs7207582	44095570	rs62062284	0.968522	rs7207582	A	G	0.00695424	4.44863	8.642e-06	-4.75454	1.989e-06	MAPT	0	intronic	4.586	4	5	5	1	1	1
17	17	44210933	rs7207582	44095661	rs62062285	0.958005	rs7207582	G	T	0.00769716	4.42075	9.836e-06	-4.75201	2.014e-06	MAPT	0	intronic	4.944	4	4	5	1	1	1
17	17	44210933	rs7207582	44096486	rs62062286	0.968522	rs7207582	T	C	0.0072709	4.43639	9.148e-06	-4.65793	3.194e-06	MAPT	0	intronic	7.125	7	4	5	1	1	1
17	17	44210933	rs7207582	44096553	rs62062288	0.937355	rs7207582	A	G	0.0236201	4.57448	4.774e-06	-4.08519	4.404e-05	MAPT	0	intronic	0.065	7	4	5	1	1	1
17	17	44210933	rs7207582	44098967	rs17652520	0.952497	rs7207582	A	G	0.00898189	4.3785	1.195e-05	-4.5632	5.038e-06	MAPT	0	intronic	0.283	7	4	5	1	1	1
17	17	44210933	rs7207582	44099082	rs17573907	0.968522	rs7207582	T	C	0.00695424	4.44863	8.642e-06	-4.72849	2.262e-06	MAPT	0	intronic	0.728	7	4	5	1	1	1
17	17	44210933	rs7207582	44099129	rs62062290	0.963284	rs7207582	A	C	0.0106683	4.33016	1.49e-05	-4.75191	2.015e-06	MAPT	0	intronic	5.256	4	4	5	1	1	1
17	17	44210933	rs7207582	44099669	rs55726761	0.968522	rs7207582	A	G	0.0072642	4.43665	9.137e-06	-4.80754	1.528e-06	MAPT	0	intronic	1.153	7	4	5	1	1	1
17	17	44210933	rs7207582	44099809	rs62062292	0.968522	rs7207582	C	A	0.00695746	4.44851	8.647e-06	-4.75833	1.952e-06	MAPT	0	intronic	4.225	7	4	5	1	1	1
17	17	44210933	rs7207582	44100553	rs62062293	0.968522	rs7207582	A	C	0.00695424	4.44863	8.642e-06	-4.75833	1.952e-06	MAPT	0	intronic	7.461	5	4	5	1	1	1
17	17	44210933	rs7207582	44100666	rs62062294	0.963308	rs7207582	C	A	0.00492517	4.53715	5.702e-06	-4.77245	1.82e-06	MAPT	0	intronic	4.218	5	4	5	1	1	1
17	17	44210933	rs7207582	44100906	rs62062295	0.968522	rs7207582	G	A	0.00695746	4.44851	8.647e-06	-4.79191	1.652e-06	MAPT	0	intronic	0.689	6	4	5	1	1	1
17	17	44210933	rs7207582	44100916	rs62062296	0.968522	rs7207582	T	C	0.00695424	4.44863	8.642e-06	-4.75242	2.01e-06	MAPT	0	intronic	0.173	6	4	5	1	1	1
17	17	44210933	rs7207582	44101004	rs62062297	0.968522	rs7207582	G	A	0.00695746	4.44851	8.647e-06	-4.71755	2.387e-06	MAPT	0	intronic	1.541	6	4	5	1	1	1
17	17	44210933	rs7207582	44101563	rs9468	0.963144	rs7207582	C	T	0.00776989	4.41837	9.945e-06	-4.90796	9.203e-07	MAPT	0	UTR3	9.844	1f	4	5	1	1	1
17	17	44210933	rs7207582	44101871	rs8712	0.963144	rs7207582	G	A	0.00748628	4.42805	9.509e-06	-4.74491	2.086e-06	MAPT	0	UTR3	12.88	5	4	5	1	1	1
17	17	44210933	rs7207582	44102604	rs1052587	0.968522	rs7207582	C	T	0.00639447	4.47019	7.815e-06	-4.84206	1.285e-06	MAPT	0	UTR3	1	1f	4	5	1	1	1
17	17	44210933	rs7207582	44102638	rs1052590	0.968522	rs7207582	G	A	0.00695746	4.44851	8.647e-06	-4.72108	2.346e-06	MAPT	0	UTR3	6.413	5	4	5	1	1	1
17	17	44210933	rs7207582	44102865	rs17574040	0.968522	rs7207582	C	A	0.00695746	4.44851	8.647e-06	-4.84392	1.273e-06	MAPT	0	UTR3	7.102	1f	4	5	1	1	1
17	17	44210933	rs7207582	44102933	rs16940799	0.968522	rs7207582	C	T	0.00685615	4.45241	8.491e-06	-4.83447	1.335e-06	MAPT	0	UTR3	0.676	1f	4	5	1	1	1
17	17	44210933	rs7207582	44103296	rs7687	0.968522	rs7207582	C	T	0.00702209	4.44601	8.748e-06	-4.80833	1.522e-06	MAPT	0	UTR3	3.192	1d	4	5	1	1	1
17	17	44210933	rs7207582	44103616	rs17652748	0.968522	rs7207582	T	C	0.00695424	4.44863	8.642e-06	-4.83328	1.343e-06	MAPT	0	UTR3	1.614	1f	4	4	1	1	1
17	17	44210933	rs7207582	44103825	rs75010486	0.968522	rs7207582	C	T	0.00789419	4.42568	9.614e-06	-4.48539	7.278e-06	MAPT	0	UTR3	3.314		4	4	1	1	1
17	17	44210933	rs7207582	44103826	rs16940806	0.968522	rs7207582	A	G	0.0121799	4.44863	8.642e-06	-4.33464	1.46e-05	MAPT	0	UTR3	3.569	4	4	4	1	1	1
17	17	44210933	rs7207582	44104343	rs2158257	0.968522	rs7207582	C	A	0.00695746	4.44851	8.647e-06	-4.86544	1.142e-06	MAPT	0	UTR3	4.725		4	4	1	1	1
17	17	44210933	rs7207582	44104509	rs17574228	0.968522	rs7207582	C	T	0.00716837	4.44036	8.981e-06	-4.85399	1.21e-06	MAPT	0	UTR3	1.197	1f	4	4	1	1	1
17	17	44210933	rs7207582	44106219	rs78681971	0.968522	rs7207582	T	C	0.00695424	4.44863	8.642e-06	-4.76959	1.846e-06	MAPT	518	downstream	1.267	5	4	4	1	1	1
17	17	44210933	rs7207582	44106220	rs79772576	0.963144	rs7207582	G	A	0.00669322	4.4587	8.246e-06	-4.79252	1.647e-06	MAPT	519	downstream	3.663	5	4	4	1	1	1
17	17	44210933	rs7207582	44106806	rs78229689	0.968522	rs7207582	A	G	0.00678358	4.45521	8.381e-06	-4.76959	1.846e-06	KANSL1	475	downstream	1.714	5	4	4	1	1	1
17	17	44210933	rs7207582	44108100	rs7350928	0.968522	rs7207582	T	C	0.00678425	4.45519	8.382e-06	-4.90439	9.372e-07	KANSL1	0	UTR3	8.126	1f	3	4	1	1	1
17	17	44210933	rs7207582	44108202	rs17574361	0.968522	rs7207582	G	A	0.0067869	4.45508	8.386e-06	-4.84738	1.251e-06	KANSL1	0	UTR3	10.44	1f	3	4	1	1	1
17	17	44210933	rs7207582	44108355	rs17652961	0.968522	rs7207582	A	G	0.00678425	4.45519	8.382e-06	-4.83402	1.338e-06	KANSL1	0	UTR3	3.68	1f	3	4	1	1	1
17	17	44210933	rs7207582	44108906	rs34579536	0.968522	rs7207582	G	A	0.00713792	4.44153	8.932e-06	-4.81994	1.436e-06	KANSL1	0	exonic	14.36	3a	3	4	1	1	1
17	17	44210933	rs7207582	44109248	rs55881134	0.968522	rs7207582	A	G	0.00698058	4.44761	8.683e-06	-4.73202	2.223e-06	KANSL1	0	intronic	4.913	5	3	4	1	1	1
17	17	44210933	rs7207582	44110271	rs7350980	1	rs7207582	A	G	0.00439928	4.67518	2.937e-06	-4.67616	2.923e-06	KANSL1	0	intronic	0.131	6	3	4	1	1	0
17	17	44210933	rs7207582	44110532	rs36076725	0.968522	rs7207582	A	G	0.00702272	4.44599	8.749e-06	-4.74735	2.061e-06	KANSL1	0	exonic	14.41	5	3	4	1	1	0
17	17	44210933	rs7207582	44110541	rs35833914	0.968522	rs7207582	A	G	0.00702272	4.44599	8.749e-06	-4.73926	2.145e-06	KANSL1	0	exonic	13.15	5	3	4	1	1	0
17	17	44210933	rs7207582	44111109	rs62062321	0.968522	rs7207582	G	A	0.00708093	4.44374	8.841e-06	-4.73056	2.239e-06	KANSL1	0	intronic	10.26	3a	4	4	1	1	0
17	17	44210933	rs7207582	44111613	rs17574604	0.968522	rs7207582	G	A	0.00735602	4.43309	9.289e-06	-4.89164	1e-06	KANSL1	0	exonic	10.24	6	4	4	1	1	0
17	17	44210933	rs7207582	44111827	rs17653162	0.968522	rs7207582	A	C	0.00710794	4.44269	8.884e-06	-4.85897	1.18e-06	KANSL1	0	intronic	4.34	6	4	4	1	1	0
17	17	44210933	rs7207582	44112385	rs62062322	0.968522	rs7207582	G	A	0.00718631	4.43966	9.01e-06	-4.74569	2.078e-06	KANSL1	0	intronic	8.588	4	4	4	1	1	0
17	17	44210933	rs7207582	44112441	rs17653193	0.968522	rs7207582	A	G	0.00719248	4.43942	9.02e-06	-4.87629	1.081e-06	KANSL1	0	intronic	3.45	1b	4	4	1	1	0
17	17	44210933	rs7207582	44112638	rs17653211	0.968522	rs7207582	C	T	0.00718631	4.43966	9.01e-06	-4.88871	1.015e-06	KANSL1	0	intronic	6.144	1b	4	4	1	1	0
17	17	44210933	rs7207582	44112743	rs17653255	0.968522	rs7207582	A	C	0.00719248	4.43942	9.02e-06	-4.85863	1.182e-06	KANSL1:RP11-669E14.6	0:0	ncRNA_intronic	4.571	1d	4	4	1	1	0
17	17	44210933	rs7207582	44113359	rs4608377	0.968522	rs7207582	C	T	0.00727333	4.4363	9.152e-06	-4.83507	1.331e-06	KANSL1	0	intronic	3.697	6	4	4	1	1	0
17	17	44210933	rs7207582	44113491	rs12185225	0.968522	rs7207582	C	T	0.00731453	4.4347	9.22e-06	-4.74164	2.12e-06	KANSL1	0	intronic	5.417	7	4	4	1	1	0
17	17	44210933	rs7207582	44113963	rs12150438	0.968522	rs7207582	T	C	0.00735781	4.43303	9.292e-06	-4.7203	2.355e-06	KANSL1	0	intronic	4.433	5	4	4	1	1	0
17	17	44210933	rs7207582	44114218	rs12150162	0.968522	rs7207582	C	T	0.00735602	4.43309	9.289e-06	-4.71935	2.366e-06	KANSL1	0	intronic	1.696	5	4	4	1	1	0
17	17	44210933	rs7207582	44114432	rs62062134	0.968522	rs7207582	C	A	0.0073972	4.4315	9.358e-06	-4.74259	2.11e-06	KANSL1	0	intronic	1.33	5	4	4	1	1	0
17	17	44210933	rs7207582	44115074	rs17574796	0.968522	rs7207582	C	T	0.00748394	4.42814	9.505e-06	-4.79203	1.651e-06	KANSL1	0	intronic	3.037	1f	4	4	1	1	0
17	17	44210933	rs7207582	44115107	rs17574824	0.968522	rs7207582	T	C	0.00744222	4.42976	9.434e-06	-4.82373	1.409e-06	KANSL1	0	intronic	0.21	1f	4	4	1	1	0
17	17	44210933	rs7207582	44115351	rs12185243	0.968522	rs7207582	C	T	0.0062385	4.47618	7.599e-06	-4.88184	1.051e-06	KANSL1	0	intronic	6.295	1f	4	4	1	1	0
17	17	44210933	rs7207582	44115440	rs8077487	1	rs7207582	C	T	0.00447766	4.65871	3.182e-06	-4.67061	3.003e-06	KANSL1	0	intronic	4.247	1b	4	4	1	1	0
17	17	44210933	rs7207582	44115569	rs11079729	0.968522	rs7207582	A	C	0.00851278	4.39397	1.113e-05	-4.87465	1.09e-06	KANSL1	0	intronic	5.501	6	4	4	1	1	0
17	17	44210933	rs7207582	44115730	rs12150542	0.968522	rs7207582	A	G	0.0075271	4.42646	9.579e-06	-4.88091	1.056e-06	KANSL1	0	intronic	3.174	6	4	4	1	1	0
17	17	44210933	rs7207582	44115886	rs12150090	0.968522	rs7207582	T	C	0.00735781	4.43303	9.292e-06	-4.88297	1.045e-06	KANSL1	0	intronic	6.176	1f	4	4	1	1	0
17	17	44210933	rs7207582	44116238	rs41437445	0.968522	rs7207582	A	G	0.00735781	4.43303	9.292e-06	-4.74853	2.049e-06	KANSL1	0	intronic	16.83	7	4	4	1	1	0
17	17	44210933	rs7207582	44116312	rs62062136	0.968522	rs7207582	C	T	0.00761752	4.42335	9.718e-06	-4.74346	2.101e-06	KANSL1	0	intronic	12.96	6	4	4	1	1	0
17	17	44210933	rs7207582	44116950	rs7221390	1	rs7207582	G	T	0.00534981	4.66514	3.084e-06	-4.61368	3.956e-06	KANSL1	0	intronic	0.104	1f	4	4	1	1	0
17	17	44210933	rs7207582	44117119	rs34043286	0.968522	rs7207582	G	A	0.00766623	4.42176	9.79e-06	-4.79608	1.618e-06	KANSL1	0	exonic	21	4	4	4	1	1	0
17	17	44210933	rs7207582	44117397	rs10514897	0.968522	rs7207582	G	A	0.00766623	4.42176	9.79e-06	-4.8477	1.249e-06	KANSL1	0	intronic	7.578	1f	4	4	1	1	0
17	17	44210933	rs7207582	44118848	rs62062137	0.968522	rs7207582	A	G	0.00766825	4.42169	9.793e-06	-4.53972	5.633e-06	KANSL1	0	intronic	2.528	5	4	4	1	1	0
17	17	44210933	rs7207582	44118999	rs41382552	0.968522	rs7207582	G	A	0.00756845	4.42496	9.646e-06	-4.80173	1.573e-06	KANSL1	0	intronic	4.257	7	4	4	1	1	0
17	17	44210933	rs7207582	44119320	rs55893711	0.968522	rs7207582	T	C	0.00808411	4.40806	1.043e-05	-4.73321	2.21e-06	KANSL1	0	intronic	0.55	7	4	4	1	1	0
17	17	44210933	rs7207582	44119636	rs10514898	0.968522	rs7207582	C	A	0.00761752	4.42335	9.718e-06	-4.92142	8.592e-07	KANSL1	0	intronic	4.198	6	4	4	1	1	0
17	17	44210933	rs7207582	44120442	rs41374248	0.968522	rs7207582	G	A	0.00735602	4.43309	9.289e-06	-4.75272	2.007e-06	KANSL1	0	intronic	4.559	5	4	4	1	1	1
17	17	44210933	rs7207582	44120608	rs79252344	0.968522	rs7207582	G	A	0.00761752	4.42335	9.718e-06	-4.76251	1.912e-06	KANSL1	0	intronic	4.093	6	4	4	1	1	1
17	17	44210933	rs7207582	44123248	rs62063670	0.968522	rs7207582	C	T	0.00749622	4.42766	9.526e-06	-4.65826	3.189e-06	KANSL1	0	intronic	2.549	3a	4	4	1	1	1
17	17	44210933	rs7207582	44123685	rs74571696	0.968522	rs7207582	A	G	0.0077679	4.41843	9.942e-06	-4.65813	3.191e-06	KANSL1	0	intronic	3.147	5	4	4	1	1	1
17	17	44210933	rs7207582	44123717	rs79698033	0.968522	rs7207582	T	C	0.0077679	4.41843	9.942e-06	-4.70554	2.532e-06	KANSL1	0	intronic	0.606		4	4	1	1	1
17	17	44210933	rs7207582	44124535	rs79065019	0.968522	rs7207582	C	T	0.00761752	4.42335	9.718e-06	-4.74559	2.079e-06	KANSL1	0	intronic	2.755	4	4	4	1	1	1
17	17	44210933	rs7207582	44124837	rs62063671	0.968522	rs7207582	G	A	0.00746106	4.42903	9.466e-06	-4.69693	2.641e-06	KANSL1	0	intronic	1.46	7	4	4	1	1	1
17	17	44210933	rs7207582	44125066	rs112578465	0.968522	rs7207582	T	C	0.00737336	4.43242	9.318e-06	-4.71781	2.384e-06	KANSL1	0	intronic	1.101	7	4	4	1	1	1
17	17	44210933	rs7207582	44125484	rs62063673	0.968522	rs7207582	G	T	0.0073332	4.43398	9.251e-06	-4.66171	3.136e-06	KANSL1	0	intronic	3.477	7	4	4	1	1	1
17	17	44210933	rs7207582	44125704	rs12150336	0.968522	rs7207582	T	C	0.00718816	4.43959	9.013e-06	-4.70052	2.595e-06	KANSL1	0	intronic	13.5	6	4	4	1	1	1
17	17	44210933	rs7207582	44126218	rs12150570	0.968522	rs7207582	A	G	0.00710292	4.44289	8.876e-06	-4.7125	2.447e-06	KANSL1	0	intronic	5.064	6	4	4	1	1	1
17	17	44210933	rs7207582	44126365	rs7218319	1	rs7207582	T	C	0.00340539	4.6807	2.859e-06	-4.75545	1.98e-06	KANSL1	0	intronic	5.595	6	4	4	1	1	1
17	17	44210933	rs7207582	44126650	rs112746008	0.968522	rs7207582	T	C	0.00706076	4.44452	8.809e-06	-4.74814	2.053e-06	KANSL1	0	intronic	3.821	6	4	4	1	1	1
17	17	44210933	rs7207582	44126673	rs112333322	0.968522	rs7207582	G	A	0.00753706	4.44442	8.813e-06	-4.50036	6.784e-06	KANSL1	0	intronic	3.771	6	4	4	1	1	1
17	17	44210933	rs7207582	44126691	rs111327992	0.968522	rs7207582	A	G	0.00706076	4.44452	8.809e-06	-4.68799	2.759e-06	KANSL1	0	intronic	0.979	6	4	4	1	1	1
17	17	44210933	rs7207582	44126765	rs113434679	0.767973	rs7207582	A	C	0.0119512	4.29755	1.727e-05	-4.83507	1.331e-06	KANSL1	0	intronic	2.31	6	4	4	1	1	1
17	17	44210933	rs7207582	44128125	rs12150447	0.968522	rs7207582	C	A	0.00706328	4.44442	8.813e-06	-4.92884	8.272e-07	KANSL1	0	intronic	5.23	1f	4	4	1	1	1
17	17	44210933	rs7207582	44128407	rs12150064	0.968522	rs7207582	A	C	0.00706076	4.44452	8.809e-06	-4.79472	1.629e-06	KANSL1	0	intronic	1.908	1f	4	4	1	1	1
17	17	44210933	rs7207582	44129253	rs17575423	0.968522	rs7207582	C	T	0.00706328	4.44442	8.813e-06	-4.83122	1.357e-06	KANSL1	0	intronic	6.932	1f	4	5	1	1	1
17	17	44210933	rs7207582	44129800	rs62063676	0.968522	rs7207582	A	G	0.00706076	4.44452	8.809e-06	-4.88968	1.01e-06	KANSL1	0	intronic	0.061	5	4	5	1	1	1
17	17	44210933	rs7207582	44129885	rs62063677	0.968522	rs7207582	T	C	0.00706076	4.44452	8.809e-06	-4.87357	1.096e-06	KANSL1	0	intronic	0.34	7	4	5	1	1	1
17	17	44210933	rs7207582	44130587	rs79649865	0.968522	rs7207582	G	T	0.00706328	4.44442	8.813e-06	-4.92151	8.588e-07	KANSL1	0	intronic	3.79	7	4	5	1	1	0
17	17	44210933	rs7207582	44130878	rs111853996	0.968522	rs7207582	G	A	0.00706328	4.44442	8.813e-06	-4.86133	1.166e-06	KANSL1	0	intronic	2.774	6	4	5	1	1	0
17	17	44210933	rs7207582	44131022	rs112074397	0.968522	rs7207582	C	T	0.00706328	4.44442	8.813e-06	-4.91401	8.923e-07	KANSL1	0	intronic	3.68	6	4	5	1	1	0
17	17	44210933	rs7207582	44131559	rs62063680	0.968522	rs7207582	A	C	0.00706076	4.44452	8.809e-06	-4.87017	1.115e-06	KANSL1	0	intronic	2.433	5	4	5	1	1	0
17	17	44210933	rs7207582	44131592	rs62063681	0.968522	rs7207582	G	A	0.00694587	4.44895	8.629e-06	-4.87776	1.073e-06	KANSL1	0	intronic	1.638	5	4	5	1	1	0
17	17	44210933	rs7207582	44131622	rs62063682	0.968522	rs7207582	A	G	0.00706076	4.44452	8.809e-06	-4.87017	1.115e-06	KANSL1	0	intronic	3.063	5	4	5	1	1	0
17	17	44210933	rs7207582	44131717	rs62063683	0.968522	rs7207582	A	G	0.00706076	4.44452	8.809e-06	-4.88659	1.026e-06	KANSL1	0	intronic	2.526	7	4	5	1	1	0
17	17	44210933	rs7207582	44131798	rs79180862	0.968522	rs7207582	T	C	0.00706076	4.44452	8.809e-06	-4.8535	1.213e-06	KANSL1	0	intronic	12.26	5	4	5	1	1	0
17	17	44210933	rs7207582	44132269	rs62063684	0.968522	rs7207582	C	T	0.00706328	4.44442	8.813e-06	-4.82458	1.403e-06	KANSL1	0	intronic	2.769	5	4	5	1	1	0
17	17	44210933	rs7207582	44132592	rs62063687	0.968522	rs7207582	G	A	0.00706328	4.44442	8.813e-06	-4.87303	1.099e-06	KANSL1	0	intronic	2.397	6	4	5	1	1	0
17	17	44210933	rs7207582	44132887	rs62060760	0.968522	rs7207582	T	C	0.00706076	4.44452	8.809e-06	-4.87502	1.088e-06	KANSL1	0	intronic	8.666	6	4	5	1	1	0
17	17	44210933	rs7207582	44133142	rs17653906	0.968522	rs7207582	A	G	0.00710292	4.44289	8.876e-06	-5.02828	4.949e-07	KANSL1	0	intronic	8.151	6	4	5	1	1	0
17	17	44210933	rs7207582	44133162	rs62060761	0.968522	rs7207582	C	A	0.00706328	4.44442	8.813e-06	-4.91556	8.853e-07	KANSL1	0	intronic	8.263	6	4	5	1	1	0
17	17	44210933	rs7207582	44133396	rs62060762	0.968522	rs7207582	A	G	0.00706076	4.44452	8.809e-06	-4.86982	1.117e-06	KANSL1	0	intronic	0.022	7	4	5	1	1	0
17	17	44210933	rs7207582	44133403	rs62060763	0.968522	rs7207582	C	T	0.00706328	4.44442	8.813e-06	-4.8593	1.178e-06	KANSL1	0	intronic	0.387	7	4	5	1	1	0
17	17	44210933	rs7207582	44133534	rs111259120	0.968522	rs7207582	T	C	0.00706076	4.44452	8.809e-06	-4.88072	1.057e-06	KANSL1	0	intronic	3.822	7	4	5	1	1	0
17	17	44210933	rs7207582	44133633	rs62060764	0.968522	rs7207582	G	A	0.00706328	4.44442	8.813e-06	-4.88128	1.054e-06	KANSL1	0	intronic	2.935	7	4	5	1	1	0
17	17	44210933	rs7207582	44133648	rs62060765	0.968522	rs7207582	C	A	0.00706328	4.44442	8.813e-06	-4.88128	1.054e-06	KANSL1	0	intronic	4.471	7	4	5	1	1	0
17	17	44210933	rs7207582	44134095	rs17575507	0.968522	rs7207582	G	A	0.00706328	4.44442	8.813e-06	-4.97158	6.641e-07	KANSL1	0	intronic	1.072	1f	2	5	1	1	0
17	17	44210933	rs7207582	44134391	rs876944	0.968522	rs7207582	T	G	0.00706076	4.44452	8.809e-06	-4.99456	5.897e-07	KANSL1	0	intronic	1.188	1f	2	5	1	1	0
17	17	44210933	rs7207582	44134910	rs62060767	0.968522	rs7207582	A	G	0.00701827	4.44616	8.742e-06	-4.89215	9.974e-07	KANSL1	0	intronic	1.753	4	2	5	1	1	0
17	17	44210933	rs7207582	44134984	rs62060768	0.968522	rs7207582	A	G	0.00701827	4.44616	8.742e-06	-4.87794	1.072e-06	KANSL1	0	intronic	4.838	5	2	5	1	1	0
17	17	44210933	rs7207582	44135359	rs1107820	0.968522	rs7207582	C	T	0.00706328	4.44442	8.813e-06	-4.98638	6.152e-07	KANSL1	0	intronic	2.681		2	5	1	1	0
17	17	44210933	rs7207582	44135827	rs17575556	0.963144	rs7207582	A	G	0.00789152	4.41438	1.013e-05	-5.05096	4.396e-07	KANSL1	0	intronic	10.65	1f	4	5	1	1	0
17	17	44210933	rs7207582	44135985	rs17653998	0.968522	rs7207582	G	A	0.00690444	4.45055	8.565e-06	-5.03542	4.768e-07	KANSL1	0	intronic	5.844	1f	4	5	1	1	0
17	17	44210933	rs7207582	44136577	rs111372048	0.968522	rs7207582	C	A	0.00677628	4.45549	8.37e-06	-4.86014	1.173e-06	KANSL1	0	intronic	5.134	6	4	5	1	1	0
17	17	44210933	rs7207582	44136634	rs62060785	0.968522	rs7207582	A	G	0.00685287	4.45254	8.486e-06	-4.91888	8.704e-07	KANSL1	0	intronic	1.495	7	4	5	1	1	0
17	17	44210933	rs7207582	44136763	rs62060786	0.968522	rs7207582	T	C	0.00685287	4.45254	8.486e-06	-4.84067	1.294e-06	KANSL1	0	intronic	2.964	6	4	5	1	1	0
17	17	44210933	rs7207582	44136803	rs62060787	0.968522	rs7207582	T	G	0.00685287	4.45254	8.486e-06	-4.91036	9.091e-07	KANSL1	0	intronic	2.693	7	4	5	1	1	0
17	17	44210933	rs7207582	44137070	rs41384744	0.968522	rs7207582	G	A	0.00664782	4.46044	8.179e-06	-4.89751	9.706e-07	KANSL1	0	intronic	0.322	3a	4	5	1	1	0
17	17	44210933	rs7207582	44137311	rs55690782	0.968522	rs7207582	A	G	0.00681008	4.45419	8.421e-06	-4.88697	1.024e-06	KANSL1	0	intronic	1.175	5	4	5	1	1	0
17	17	44210933	rs7207582	44137925	rs17654016	0.968522	rs7207582	C	T	0.00669322	4.4587	8.246e-06	-5.02674	4.989e-07	KANSL1	0	intronic	2.933	1f	4	5	1	1	0
17	17	44210933	rs7207582	44138201	rs7220752	1	rs7207582	C	T	0.00410262	4.68497	2.8e-06	-4.69709	2.639e-06	KANSL1	0	intronic	5.378	6	4	5	1	1	0
17	17	44210933	rs7207582	44139662	rs17575683	0.968522	rs7207582	T	C	0.00669861	4.45849	8.254e-06	-5.02001	5.167e-07	KANSL1	0	intronic	9.205		4	5	1	1	0
17	17	44210933	rs7207582	44140341	rs2316953	0.968522	rs7207582	A	G	0.00669861	4.45849	8.254e-06	-4.93088	8.186e-07	KANSL1	0	intronic	0.563	6	4	5	1	1	0
17	17	44210933	rs7207582	44141347	rs2838	0.968522	rs7207582	G	A	0.00669322	4.4587	8.246e-06	-5.02482	5.039e-07	KANSL1	0	intronic	8.011	6	4	5	1	1	0
17	17	44210933	rs7207582	44141732	rs12150127	0.968522	rs7207582	A	G	0.00669861	4.45849	8.254e-06	-4.89932	9.617e-07	KANSL1	0	intronic	0.806	5	4	5	1	1	0
17	17	44210933	rs7207582	44142121	rs76307183	0.968522	rs7207582	A	G	0.00669861	4.45849	8.254e-06	-4.90034	9.567e-07	KANSL1	0	intronic	5.271	5	4	5	1	1	0
17	17	44210933	rs7207582	44142427	rs62060793	0.968522	rs7207582	G	A	0.00669322	4.4587	8.246e-06	-4.88335	1.043e-06	KANSL1	0	intronic	0.143	7	4	4	1	1	0
17	17	44210933	rs7207582	44142566	rs62060794	0.968522	rs7207582	T	C	0.00669861	4.45849	8.254e-06	-4.89549	9.806e-07	KANSL1	0	intronic	3.987	5	4	4	1	1	0
17	17	44210933	rs7207582	44142663	rs62060795	0.968522	rs7207582	T	C	0.00716527	4.44048	8.976e-06	-4.90125	9.523e-07	KANSL1	0	intronic	1.998	5	4	4	1	1	0
17	17	44210933	rs7207582	44142879	rs17575773	0.968522	rs7207582	T	C	0.00669861	4.45849	8.254e-06	-4.90084	9.543e-07	KANSL1	0	intronic	0.49	6	4	4	1	1	0
17	17	44210933	rs7207582	44143344	rs62060797	0.968522	rs7207582	A	G	0.00669861	4.45849	8.254e-06	-4.89125	1.002e-06	KANSL1	0	intronic	5.479	6	4	4	1	1	0
17	17	44210933	rs7207582	44143484	rs12150344	0.968522	rs7207582	A	G	0.00669861	4.45849	8.254e-06	-4.88316	1.044e-06	KANSL1	0	intronic	3.418	7	4	4	1	1	0
17	17	44210933	rs7207582	44144152	rs62060798	0.958005	rs7207582	C	T	0.00658555	4.46284	8.088e-06	-4.88871	1.015e-06	KANSL1	0	intronic	9.04	6	3	4	1	1	0
17	17	44210933	rs7207582	44144251	rs62060799	0.958005	rs7207582	T	G	0.00658555	4.46284	8.088e-06	-4.90965	9.124e-07	KANSL1	0	intronic	1.508	7	3	4	1	1	0
17	17	44210933	rs7207582	44144345	rs17575822	0.968522	rs7207582	G	A	0.00669322	4.4587	8.246e-06	-4.83914	1.304e-06	KANSL1	0	intronic	10.4	6	3	4	1	1	0
17	17	44210933	rs7207582	44144387	rs17575850	0.968522	rs7207582	A	C	0.00644339	4.46831	7.884e-06	-4.98308	6.258e-07	KANSL1	0	intronic	2.304	6	3	4	1	1	0
17	17	44210933	rs7207582	44144634	rs17659731	0.968522	rs7207582	A	G	0.00669861	4.45849	8.254e-06	-4.99326	5.937e-07	KANSL1	0	intronic	4.791	1f	4	4	1	1	0
17	17	44210933	rs7207582	44145373	rs75641221	0.968522	rs7207582	C	T	0.00669322	4.4587	8.246e-06	-4.87231	1.103e-06	KANSL1	0	intronic	7.662	6	4	5	1	1	0
17	17	44210933	rs7207582	44145592	rs62060800	0.968522	rs7207582	G	A	0.00669322	4.4587	8.246e-06	-4.86614	1.138e-06	KANSL1	0	intronic	1.04	7	4	5	1	1	0
[truncated: 359 more rows]

## Sheet: Table S6
Table S6. All SNPs jointly associated with ASD and EDU having a conjFDR <0.10 and an r2≧0.6 with one of the independent significant SNPs
Function = functional variant classification based on position in or outside of a gene; CADD = Combined Annotation-Dependent depletion score, which predict how deleterious the SNP effect is on protein structure/function (higher scores indicate more deleterious); RegulomeDB scores predict likelihood of regulatory functionality (lower scores indicate higher likelihood); NA = not annotated; minChrSt…
locusnum	CHR	INDEP_BP	INDEP_SNP	CAND_BP	CAND_SNP	R2	LEAD_SNP	A1	A2	FDR	ASD_Z	ASD_PVAL	EDU_Z	EDU_PVAL	nearestGene	dist	func	CADD	RDB	minChrState	commonChrState	posMapFilt	eqtlMapFilt	ciMapFilt
1	1	46021556	rs12049503	46015005	rs12077621	0.994023	rs12049503	A	G	0.0597452	3.66722	0.0002452	4.17884	2.93e-05	AKR1A1	1209	intergenic	2.364	6	5	5	1	1	1
1	1	46021556	rs12049503	46015751	rs11211139	0.994023	rs12049503	T	G	0.0603017	3.66185	0.0002504	4.15946	3.19e-05	AKR1A1	463	upstream	1.878	7	1	5	1	1	1
1	1	46021556	rs12049503	46020408	rs34768551	0.994023	rs12049503	A	G	0.0509657	3.75607	0.0001726	4.17652	2.96e-05	AKR1A1	0	intronic	2.66	5	4	5	1	1	1
1	1	46021556	rs12049503	46021556	rs12049503	1	rs12049503	A	C	0.049667	3.77007	0.0001632	4.10065	4.12e-05	AKR1A1	0	intronic	1.325	1f	4	4	1	1	1
2	1	72614077	rs7517923	72558138	rs12140090	0.96558	rs1620977	C	T	0.0529214	3.73569	0.0001872	7.69187	1.45e-14	NEGR1	0	intronic	9.247	6	15	15	1	1	0
2	1	72614077	rs7517923	72559740	rs727726	0.879836	rs1620977	C	T	0.0965122	3.35509	0.0007934	6.98493	2.85e-12	NEGR1	0	intronic	2.197	6	15	15	1	0	0
2	1	72614077	rs7517923	72571656	rs1352082	0.96558	rs1620977	A	C	0.0564841	3.69941	0.0002161	7.70982	1.26e-14	NEGR1	0	intronic	11.39	7	5	15	1	1	0
2	1	72614077	rs7517923	72573363	rs1486093	0.96558	rs1620977	C	T	0.052534	3.73962	0.0001843	7.70006	1.36e-14	NEGR1	0	intronic	9.793	6	5	15	1	1	0
2	1	72614077	rs7517923	72573798	rs1564970	0.96558	rs1620977	C	T	0.050353	3.76268	0.0001681	7.71927	1.17e-14	NEGR1	0	intronic	3.957	6	5	15	1	1	0
2	1	72614077	rs7517923	72578709	rs12402629	0.973427	rs1620977	C	T	0.0481247	3.78664	0.0001527	7.70681	1.29e-14	NEGR1	0	intronic	1.543	7	5	15	1	1	0
2	1	72614077	rs7517923	72584184	rs1486096	0.981168	rs1620977	A	G	0.0502701	3.76358	0.0001675	7.7617	8.38e-15	NEGR1	0	intronic	3.449	5	5	15	1	1	0
2	1	72614077	rs7517923	72586208	rs11209915	0.981168	rs1620977	T	C	0.0543008	3.72168	0.0001979	7.72598	1.11e-14	NEGR1	0	intronic	6.799	6	5	15	1	1	0
2	1	72614077	rs7517923	72586209	rs11209916	0.981168	rs1620977	G	A	0.0538069	3.7267	0.000194	7.76079	8.44e-15	NEGR1	0	intronic	7.903	6	5	15	1	1	0
2	1	72614077	rs7517923	72593174	rs4649954	0.901644	rs1620977	T	G	0.0607949	3.65708	0.0002551	7.87976	3.28e-15	NEGR1	0	intronic	3.623	6	5	15	1	1	0
2	1	72614077	rs7517923	72593767	rs12141628	0.981168	rs1620977	T	C	0.0503254	3.76298	0.0001679	7.73184	1.06e-14	NEGR1	0	intronic	4.978	6	5	15	1	1	0
2	1	72614077	rs7517923	72597051	rs12132602	0.981168	rs1620977	G	A	0.0494815	3.77207	0.0001619	7.67075	1.71e-14	NEGR1	0	intronic	3.803	5	15	15	1	1	0
2	1	72614077	rs7517923	72610879	rs12133604	0.981168	rs1620977	T	G	0.0494958	3.77191	0.000162	7.72483	1.12e-14	NEGR1	0	intronic	3.349	6	5	15	1	1	0
2	1	72614077	rs7517923	72612371	rs11209921	0.981168	rs1620977	T	C	0.0487096	3.78036	0.0001566	7.69545	1.41e-14	NEGR1	0	intronic	2.768	6	5	15	1	1	0
2	1	72614077	rs7517923	72613608	rs7515320	0.981168	rs1620977	T	G	0.0468446	3.80034	0.0001445	7.71186	1.24e-14	NEGR1	0	intronic	0.151	6	4	15	1	1	0
2	1	72614077	rs7517923	72613917	rs7541218	0.981168	rs1620977	T	C	0.0467159	3.80171	0.0001437	7.69099	1.46e-14	NEGR1	0	intronic	1.99	7	4	15	1	1	0
2	1	72614077	rs7517923	72614077	rs7517923	1	rs1620977	T	G	0.0460885	3.80852	0.0001398	7.64935	2.02e-14	NEGR1	0	intronic	1.238	7	4	15	1	1	0
2	1	72614077	rs7517923	72618544	rs2422136	0.797486	rs1620977	C	A	0.0818972	-3.46869	0.000523	-7.24928	4.19e-13	NEGR1	0	intronic	0.99	6	5	15	1	1	0
2	1	72614077	rs7517923	72619961	rs2422137	0.939036	rs1620977	A	C	0.0634911	3.63093	0.0002824	7.60957	2.75e-14	NEGR1	0	intronic	0.389	7	5	15	1	1	0
2	1	72614077	rs7517923	72627031	rs11209928	0.791319	rs1620977	G	A	0.0700194	-3.57065	0.0003561	-7.20071	5.99e-13	NEGR1	0	intronic	3.165	5	5	15	1	1	0
2	1	72614077	rs7517923	72629795	rs2821296	0.794448	rs1620977	T	C	0.069031	-3.57977	0.0003439	-7.12778	1.02e-12	NEGR1	0	intronic	1.649		7	15	1	1	0
2	1	72614077	rs7517923	72634986	rs2630431	0.794448	rs1620977	T	C	0.0702494	-3.56852	0.000359	-7.13051	1e-12	NEGR1	0	intronic	7.877	7	5	15	1	1	0
2	1	72614077	rs7517923	72639856	rs2821295	0.794448	rs1620977	G	A	0.071196	-3.5599	0.000371	-7.12644	1.03e-12	NEGR1	0	intronic	0.705		15	15	1	1	0
2	1	72614077	rs7517923	72642650	rs2821293	0.794448	rs1620977	G	A	0.0744936	-3.53131	0.0004135	-7.14839	8.78e-13	NEGR1	0	intronic	1.475		15	15	1	1	0
2	1	72614077	rs7517923	72642877	rs11209932	0.794448	rs1620977	A	G	0.0702494	-3.56852	0.000359	-7.05072	1.78e-12	NEGR1	0	intronic	5.606	7	7	15	1	1	0
2	1	72614077	rs7517923	72644116	rs12036585	0.79071	rs1620977	C	T	0.072259	-3.55071	0.0003842	-7.04535	1.85e-12	NEGR1	0	intronic	11.75	5	2	15	1	1	0
2	1	72614077	rs7517923	72645734	rs6699731	0.79071	rs1620977	G	A	0.0700433	-3.57043	0.0003564	-7.12511	1.04e-12	NEGR1	0	intronic	2.356	6	5	15	1	1	0
2	1	72614077	rs7517923	72645850	rs6699841	0.781551	rs1620977	G	A	0.0722511	-3.55077	0.0003841	-7.45927	8.7e-14	NEGR1	0	intronic	13.23	7	5	15	1	1	0
2	1	72614077	rs7517923	72647443	rs11209933	0.794448	rs1620977	A	G	0.0700353	-3.5705	0.0003563	-7.15794	8.19e-13	NEGR1	0	intronic	3.877	7	5	15	1	1	0
2	1	72614077	rs7517923	72650925	rs6668604	0.79071	rs1620977	G	T	0.0722273	-3.55098	0.0003838	-7.13051	1e-12	NEGR1	0	intronic	0.514	7	5	15	1	1	0
2	1	72614077	rs7517923	72661104	rs2821288	0.79071	rs1620977	T	C	0.0700353	-3.5705	0.0003563	-7.12119	1.07e-12	NEGR1	0	intronic	2.067		5	15	1	1	0
2	1	72614077	rs7517923	72667196	rs2821285	0.79682	rs1620977	T	C	0.0722194	-3.55105	0.0003837	-7.13217	9.88e-13	NEGR1	0	intronic	0.983		5	15	1	1	0
2	1	72614077	rs7517923	72673194	rs2797540	0.806175	rs1620977	A	G	0.0749316	-3.5275	0.0004195	-7.05388	1.74e-12	NEGR1	0	intronic	0.706	6	1	15	1	1	0
2	1	72614077	rs7517923	72674489	rs1858600	0.79682	rs1620977	T	C	0.0730248	-3.54407	0.000394	-7.12248	1.06e-12	NEGR1	0	intronic	10.86	4	7	15	1	1	0
2	1	72614077	rs7517923	72681358	rs1194259	0.79682	rs1620977	G	A	0.071155	-3.56025	0.0003705	-7.15398	8.43e-13	NEGR1	0	intronic	2.051	7	9	15	1	1	0
2	1	72614077	rs7517923	72683226	rs1675356	0.806175	rs1620977	T	C	0.0761185	-3.51715	0.0004362	-7.05959	1.67e-12	NEGR1	0	intronic	1.112	6	5	15	1	1	0
2	1	72614077	rs7517923	72688503	rs1194286	0.793679	rs1620977	A	G	0.0692036	-3.57818	0.000346	-7.138	9.47e-13	NEGR1	0	intronic	3.972		5	15	1	1	0
2	1	72614077	rs7517923	72695547	rs1205484	0.793679	rs1620977	T	G	0.071384	-3.55827	0.0003733	-7.10196	1.23e-12	NEGR1	0	intronic	16.26		5	15	1	1	0
2	1	72614077	rs7517923	72696927	rs1194273	0.803024	rs1620977	T	C	0.0672357	-3.59628	0.0003228	-7.07084	1.54e-12	NEGR1	0	intronic	3.542		5	15	1	1	0
2	1	72614077	rs7517923	72701100	rs2797543	0.803024	rs1620977	A	G	0.0680837	-3.58849	0.0003326	-7.05072	1.78e-12	NEGR1	0	intronic	5.261	5	5	15	1	1	0
2	1	72614077	rs7517923	72701965	rs1194271	0.789917	rs1620977	G	A	0.0676369	-3.5926	0.0003274	-7.0922	1.32e-12	NEGR1	0	intronic	0.273		5	15	1	1	0
2	1	72614077	rs7517923	72702313	rs1194270	0.789917	rs1620977	C	T	0.0676369	-3.5926	0.0003274	-7.18061	6.94e-13	NEGR1	0	intronic	1.023		5	15	1	1	0
2	1	72614077	rs7517923	72703860	rs1194269	0.793679	rs1620977	A	G	0.0695619	-3.57487	0.0003504	-7.07729	1.47e-12	NEGR1	0	intronic	1.296		5	15	1	1	0
2	1	72614077	rs7517923	72704526	rs1194267	0.789917	rs1620977	G	A	0.0701624	-3.56933	0.0003579	-7.12119	1.07e-12	NEGR1	0	intronic	6.109		5	15	1	1	0
2	1	72614077	rs7517923	72707226	rs1194265	0.789917	rs1620977	G	A	0.0701624	-3.56933	0.0003579	-7.16167	7.97e-13	NEGR1	0	intronic	4.001		7	15	1	1	0
2	1	72614077	rs7517923	72708584	rs1026567	0.789917	rs1620977	G	A	0.0707504	-3.56389	0.0003654	-7.18441	6.75e-13	NEGR1	0	intronic	0.081		15	15	1	1	0
2	1	72614077	rs7517923	72709042	rs1026566	0.793679	rs1620977	A	G	0.0711878	-3.55997	0.0003709	-7.15878	8.14e-13	NEGR1	0	intronic	0.9		14	15	1	1	0
2	1	72614077	rs7517923	72712529	rs1194284	0.789917	rs1620977	C	A	0.0726209	-3.54757	0.0003888	-7.26144	3.83e-13	NEGR1	0	intronic	2.323		5	15	1	1	0
2	1	72614077	rs7517923	72713037	rs1194283	0.789917	rs1620977	T	C	0.0807427	-3.47814	0.0005049	-7.28528	3.21e-13	NEGR1	0	intronic	2.446		5	15	1	1	0
2	1	72614077	rs7517923	72713559	rs1194282	0.79922	rs1620977	C	T	0.0844813	-3.44745	0.0005659	-7.274	3.49e-13	NEGR1	0	intronic	0.275		4	15	1	1	0
2	1	72614077	rs7517923	72714003	rs1194281	0.789917	rs1620977	C	T	0.0845507	-3.44688	0.0005671	-7.27208	3.54e-13	NEGR1	0	intronic	0.066		5	15	1	1	0
2	1	72614077	rs7517923	72714220	rs1194278	0.789917	rs1620977	T	C	0.0888699	-3.41288	0.0006428	-7.2832	3.26e-13	NEGR1	0	intronic	0.091		5	15	1	1	0
2	1	72729142	rs1620977	72544704	rs7542974	0.632498	rs1620977	A	G	0.0937455	3.37536	0.0007372	9.67137	3.99e-22	NEGR1	0	intronic	0.891	7	15	15	1	1	0
2	1	72729142	rs1620977	72588119	rs12128707	0.773631	rs1620977	G	A	0.0450599	3.82028	0.0001333	10.0896	6.14e-24	NEGR1	0	intronic	7.961	5	1	15	1	1	0
2	1	72729142	rs1620977	72615118	rs11587434	0.772002	rs1620977	A	G	0.0431994	3.84147	0.0001223	10.0763	7.03e-24	NEGR1	0	intronic	0.131	7	5	15	1	1	0
2	1	72729142	rs1620977	72729142	rs1620977	1	rs1620977	A	G	0.0425722	3.84859	0.0001188	10.4738	1.14e-25	NEGR1	0	intronic	2.006	6	5	15	1	1	0
3	1	96479375	rs321232	96467373	rs616243	0.762811	rs66512	T	C	0.0598639	-3.66608	0.0002463	-7.51549	5.67e-14	RP11-147C23.1	0	intronic	4.364		5	15	1	0	0
3	1	96479375	rs321232	96469259	rs321255	0.753946	rs66512	G	T	0.0549688	-3.71488	0.0002033	-7.59533	3.07e-14	RP11-147C23.1	0	intronic	0.989	4	1	15	1	0	0
3	1	96479375	rs321232	96469642	rs321254	0.789933	rs66512	A	G	0.0604074	-3.66083	0.0002514	-7.42242	1.15e-13	RP11-147C23.1	0	intronic	0.491	7	5	15	1	0	0
3	1	96479375	rs321232	96470185	rs321252	0.753946	rs66512	C	A	0.0550784	-3.71376	0.0002042	-7.58875	3.23e-14	RP11-147C23.1	0	intronic	2.452	5	5	15	1	0	0
3	1	96479375	rs321232	96470547	rs321250	0.753946	rs66512	T	G	0.0552601	-3.71191	0.0002057	-7.56296	3.94e-14	RP11-147C23.1	0	intronic	5.604	7	5	15	1	0	0
3	1	96479375	rs321232	96475548	rs321244	0.750349	rs66512	G	T	0.0564726	-3.69953	0.000216	-7.52505	5.27e-14	RP11-147C23.1	0	intronic	15.57		14	15	1	0	0
3	1	96479375	rs321232	96476240	rs321243	0.753946	rs66512	T	G	0.0615229	-3.65004	0.0002622	-7.51252	5.8e-14	RP11-147C23.1	0	intronic	4.33		14	15	1	0	0
3	1	96479375	rs321232	96476493	rs321241	0.753946	rs66512	A	G	0.0576505	-3.68746	0.0002265	-7.56395	3.91e-14	RP11-147C23.1	0	intronic	1.264		14	15	1	0	0
3	1	96479375	rs321232	96477165	rs321240	0.747598	rs66512	A	C	0.0600142	-3.66463	0.0002477	-7.60771	2.79e-14	RP11-147C23.1	0	intronic	0.771		14	15	1	0	0
3	1	96479375	rs321232	96477822	rs321238	0.746683	rs66512	C	A	0.0570966	-3.69314	0.0002215	-7.4946	6.65e-14	RP11-147C23.1	0	intronic	2.198		9	15	1	0	0
3	1	96479375	rs321232	96478860	rs321236	0.775491	rs66512	A	C	0.095063	-3.36537	0.0007644	-7.05308	1.75e-12	RP11-147C23.1	0	intronic	0.42		14	15	1	0	0
3	1	96479375	rs321232	96479375	rs321232	1	rs66512	G	A	0.0312967	-3.98862	6.646e-05	-7.75607	8.76e-15	RP11-147C23.1	0	intronic	5.415		14	15	1	0	0
3	1	96479375	rs321232	96481368	rs580244	0.780102	rs66512	T	C	0.0971013	-3.3509	0.0008055	-7.07542	1.49e-12	RP11-147C23.1	0	intronic	12.49		14	15	1	0	0
3	1	96479375	rs321232	96481556	rs607674	0.780102	rs66512	T	C	0.098585	-3.34033	0.0008368	-7.03036	2.06e-12	RP11-147C23.1	0	intronic	11.4	6	14	15	1	0	0
3	1	96479375	rs321232	96482701	rs525579	0.780102	rs66512	G	A	0.0973565	-3.34908	0.0008108	-6.98104	2.93e-12	RP11-147C23.1	0	intronic	0.06		14	15	1	0	0
3	1	96479375	rs321232	96483477	rs498140	0.783216	rs66512	C	T	0.0882839	-3.41737	0.0006323	-7.15316	8.48e-13	RP11-147C23.1	0	intronic	1.113		14	15	1	0	0
3	1	96479375	rs321232	96484580	rs671266	1	rs66512	T	C	0.0346731	-3.9444	8e-05	-7.71604	1.2e-14	RP11-147C23.1	0	intronic	1.387		14	15	1	0	0
3	1	96479375	rs321232	96484940	rs635754	1	rs66512	G	A	0.0342343	-3.9501	7.812e-05	-7.76742	8.01e-15	RP11-147C23.1	0	intronic	5.557		14	15	1	0	0
3	1	96479375	rs321232	96488492	rs161127	0.779272	rs66512	T	C	0.0921261	-3.38786	0.0007044	-7.28612	3.19e-13	RP11-147C23.1	55	downstream	0.22		14	15	1	0	0
3	1	96479375	rs321232	96488563	rs161126	0.779272	rs66512	C	T	0.0901101	-3.40337	0.0006656	-7.26538	3.72e-13	RP11-147C23.1	126	downstream	8.022		14	15	1	0	0
3	1	96511272	rs66512	96479395	rs321231	0.792615	rs66512	G	A	0.0409371	3.86718	0.0001101	6.95806	3.45e-12	RP11-147C23.1	0	intronic	6.087		14	15	1	0	0
3	1	96511272	rs66512	96481173	rs619758	0.792615	rs66512	C	T	0.0393083	3.88698	0.0001015	6.87067	6.39e-12	RP11-147C23.1	0	intronic	5.605		14	15	1	0	0
3	1	96511272	rs66512	96499450	rs161116	0.821123	rs66512	A	C	0.0382217	3.90013	9.614e-05	7.16927	7.54e-13	RP11-147C23.1	11013	intergenic	2.855		5	15	0	0	0
3	1	96511272	rs66512	96509254	rs222900	0.995821	rs66512	T	G	0.000897756	4.98638	6.152e-07	6.33917	2.31e-10	RP11-147C23.1	20817	intergenic	2.558		14	15	0	0	0
3	1	96511272	rs66512	96511272	rs66512	1	rs66512	T	C	0.000577741	5.07901	3.794e-07	6.34119	2.28e-10	RP11-147C23.1	22835	intergenic	0.836		9	15	0	0	0
3	1	96511272	rs66512	96525762	rs222888	0.966953	rs66512	C	T	0.000894818	4.98708	6.13e-07	6.08159	1.19e-09	RP11-147C23.1	37325	intergenic	2.072		9	15	0	0	0
3	1	96511272	rs66512	96526728	rs222887	0.966953	rs66512	T	G	0.000857597	4.99584	5.858e-07	6.1412	8.19e-10	RP11-147C23.1	38291	intergenic	14.88		7	15	0	0	0
3	1	96511272	rs66512	96530858	rs105928	0.966953	rs66512	G	T	0.000812493	5.00646	5.544e-07	6.16229	7.17e-10	RP11-147C23.1	42421	intergenic	3.957		9	15	0	0	0
3	1	96511272	rs66512	96533782	rs222883	0.96295	rs66512	C	T	0.000886481	4.98904	6.068e-07	6.16407	7.09e-10	RP11-147C23.1	45345	intergenic	8.152		9	15	0	0	0
3	1	96511272	rs66512	96535448	rs222882	0.96295	rs66512	A	G	0.000916861	4.98188	6.297e-07	6.11559	9.62e-10	RP11-147C23.1	47011	intergenic	3.738		9	15	0	0	0
3	1	96511272	rs66512	96543995	rs150859	0.96295	rs66512	C	T	0.000944899	4.97526	6.516e-07	6.14217	8.14e-10	RP11-147C23.1	55558	intergenic	4.78		5	15	0	0	0
3	1	96511272	rs66512	96548536	rs556311	0.958979	rs66512	C	A	0.00130849	4.90397	9.392e-07	6.06014	1.36e-09	RP11-147C23.1	60099	intergenic	1.073		9	15	0	0	0
3	1	96511272	rs66512	96549641	rs638729	0.958979	rs66512	T	C	0.0012645	4.91096	9.063e-07	6.09711	1.08e-09	RP11-147C23.1	61204	intergenic	0.132		9	15	0	0	0
3	1	96511272	rs66512	96551837	rs223246	0.958979	rs66512	C	A	0.00126531	4.91083	9.069e-07	6.0737	1.25e-09	RP11-147C23.1	63400	intergenic	1.944		5	15	0	0	0
3	1	96511272	rs66512	96552025	rs223245	0.958979	rs66512	A	G	0.00138549	4.8917	9.997e-07	6.07242	1.26e-09	RP11-147C23.1	63588	intergenic	0.563		5	15	0	0	0
3	1	96511272	rs66512	96561419	rs223239	0.912904	rs66512	T	G	0.00123465	4.91636	8.817e-07	5.4623	4.7e-08	RP11-147C23.1	72982	intergenic	1.59		5	15	0	0	0
3	1	96511272	rs66512	96564857	rs686101	0.912904	rs66512	C	T	0.000982174	4.96645	6.819e-07	5.51439	3.5e-08	RP11-147C23.1	76420	intergenic	5.209	6	5	15	0	0	0
3	1	96511272	rs66512	96568595	rs72733744	0.912904	rs66512	T	C	0.000969814	4.96937	6.717e-07	5.52579	3.28e-08	RP11-147C23.1	80158	intergenic	0.21	6	5	15	0	0	0
3	1	96511272	rs66512	96569557	rs716219	0.867616	rs66512	T	C	0.000604457	5.06958	3.987e-07	5.6662	1.46e-08	RP11-147C23.1	81120	intergenic	7.557		2	15	0	0	0
3	1	96511272	rs66512	96586426	rs12089599	0.815087	rs66512	T	C	0.00106788	4.94868	7.472e-07	5.47765	4.31e-08	RP11-147C23.1	97989	intergenic	0.417	7	14	15	0	0	0
3	1	96511272	rs66512	96590857	rs61787086	0.840015	rs66512	G	T	0.00105962	4.95027	7.411e-07	5.50224	3.75e-08	RNU1-130P	100599	intergenic	13.74	7	14	15	0	0	0
3	1	96511272	rs66512	96590987	rs61787087	0.811844	rs66512	A	G	0.00114133	4.93447	8.037e-07	5.57188	2.52e-08	RNU1-130P	100469	intergenic	2.995	6	14	15	0	0	0
4	2	104227871	rs6543224	104056769	rs6752675	0.699633	rs6543224	A	G	0.095609	3.3615	0.0007752	4.73691	2.17e-06	AC092568.1	53929	intergenic	1.638	6	9	15	0	0	0
4	2	104227871	rs6543224	104058510	rs2217683	0.699633	rs6543224	A	G	0.0959738	3.35891	0.0007825	4.71308	2.44e-06	AC092568.1	52188	intergenic	0.583	7	9	15	0	0	0
4	2	104227871	rs6543224	104059441	rs4851649	0.690942	rs6543224	T	G	0.0929894	3.3812	0.0007217	4.6947	2.67e-06	AC092568.1	51257	intergenic	0.368	6	7	15	0	0	0
4	2	104227871	rs6543224	104059758	rs12622015	0.699633	rs6543224	G	A	0.0961722	3.3575	0.0007865	4.69701	2.64e-06	AC092568.1	50940	intergenic	1.393	7	7	15	0	0	0
4	2	104227871	rs6543224	104064726	rs1368549	0.702867	rs6543224	T	G	0.0948741	3.36671	0.0007607	4.79832	1.6e-06	AC092568.1	45972	intergenic	8.942	7	5	15	0	0	0
4	2	104227871	rs6543224	104070010	rs2138108	0.702867	rs6543224	A	G	0.0967128	3.35366	0.0007975	4.75751	1.96e-06	AC092568.1	40688	intergenic	1.41	7	9	15	0	0	0
4	2	104227871	rs6543224	104070012	rs2138109	0.702867	rs6543224	G	A	0.0967177	3.35363	0.0007976	4.76378	1.9e-06	AC092568.1	40686	intergenic	1.932	7	9	15	0	0	0
4	2	104227871	rs6543224	104070408	rs13032356	0.702867	rs6543224	T	C	0.0960086	3.35866	0.0007832	4.72777	2.27e-06	AC092568.1	40290	intergenic	0.681	6	9	15	0	0	0
4	2	104227871	rs6543224	104071536	rs2672847	0.702867	rs6543224	G	A	0.0926774	3.38361	0.0007154	4.74164	2.12e-06	AC092568.1	39162	intergenic	0.942	6	9	15	0	0	0
4	2	104227871	rs6543224	104072110	rs2672852	0.727198	rs6543224	T	C	0.0713106	3.55891	0.0003724	4.59106	4.41e-06	AC092568.1	38588	intergenic	9.407	7	9	15	0	0	0
4	2	104227871	rs6543224	104073034	rs817225	0.811742	rs6543224	A	G	0.0950833	3.36523	0.0007648	4.9183	8.73e-07	AC092568.1	37664	intergenic	0.106	7	9	15	0	0	0
4	2	104227871	rs6543224	104076420	rs266069	0.808162	rs6543224	C	A	0.0946557	3.36831	0.0007563	4.88391	1.04e-06	AC092568.1	34278	intergenic	5.005	7	9	15	0	0	0
4	2	104227871	rs6543224	104077388	rs266072	0.808162	rs6543224	A	G	0.09376	3.37525	0.0007375	4.86235	1.16e-06	AC092568.1	33310	intergenic	1.817	6	9	15	0	0	0
4	2	104227871	rs6543224	104077400	rs266073	0.808162	rs6543224	T	C	0.0939861	3.3735	0.0007422	4.89262	9.95e-07	AC092568.1	33298	intergenic	1.682	6	9	15	0	0	0
4	2	104227871	rs6543224	104078655	rs1368550	0.808162	rs6543224	C	T	0.0941726	3.37205	0.0007461	4.85399	1.21e-06	AC092568.1	32043	intergenic	0.583	4	9	15	0	0	0
4	2	104227871	rs6543224	104078658	rs1368551	0.808162	rs6543224	G	A	0.0944197	3.37014	0.0007513	4.88391	1.04e-06	AC092568.1	32040	intergenic	1.732	4	9	15	0	0	0
4	2	104227871	rs6543224	104084698	rs266061	0.811742	rs6543224	A	G	0.0893973	3.40884	0.0006524	4.84754	1.25e-06	AC092568.1	26000	intergenic	1.635	6	9	15	0	0	0
4	2	104227871	rs6543224	104086428	rs266058	0.803389	rs6543224	T	C	0.0885753	3.41514	0.0006375	4.87647	1.08e-06	AC092568.1	24270	intergenic	0.783		9	15	0	0	0
4	2	104227871	rs6543224	104088908	rs266048	0.808162	rs6543224	G	A	0.0916532	3.3915	0.0006951	4.89642	9.76e-07	AC092568.1	21790	intergenic	1.618	7	15	15	0	0	0
4	2	104227871	rs6543224	104089193	rs266049	0.808162	rs6543224	A	G	0.091689	3.39123	0.0006958	4.88774	1.02e-06	AC092568.1	21505	intergenic	0.898	7	9	15	0	0	0
4	2	104227871	rs6543224	104090213	rs266053	0.799785	rs6543224	C	T	0.0914787	3.39285	0.0006917	4.88774	1.02e-06	AC092568.1	20485	intergenic	1.773	6	9	15	0	0	0
4	2	104227871	rs6543224	104092326	rs197451	0.804597	rs6543224	T	C	0.0997082	3.3323	0.0008613	4.85074	1.23e-06	AC092568.1	18372	intergenic	0.66	6	9	15	0	0	0
4	2	104227871	rs6543224	104092943	rs171952	0.800515	rs6543224	G	A	0.0925878	3.3843	0.0007136	4.83823	1.31e-06	AC092568.1	17755	intergenic	4.798	6	9	15	0	0	0
4	2	104227871	rs6543224	104092954	rs2257063	0.800515	rs6543224	T	C	0.0926077	3.38415	0.000714	4.90317	9.43e-07	AC092568.1	17744	intergenic	3.594	7	9	15	0	0	0
4	2	104227871	rs6543224	104093800	rs266055	0.808162	rs6543224	A	C	0.0919184	3.38946	0.0007003	4.89844	9.66e-07	AC092568.1	16898	intergenic	1.579	7	7	15	0	0	0
4	2	104227871	rs6543224	104094008	rs817223	0.799785	rs6543224	C	T	0.0913033	3.3942	0.0006883	4.89926	9.62e-07	AC092568.1	16690	intergenic	8.17	6	7	15	0	0	0
4	2	104227871	rs6543224	104095893	rs11675977	0.808162	rs6543224	A	G	0.0892936	3.40963	0.0006505	4.88774	1.02e-06	AC092568.1	14805	intergenic	1.879	7	9	15	0	0	0
4	2	104227871	rs6543224	104095980	rs1836054	0.808162	rs6543224	C	T	0.0893428	3.40926	0.0006514	4.88582	1.03e-06	AC092568.1	14718	intergenic	11.8	6	9	15	0	0	0
4	2	104227871	rs6543224	104096243	rs11677228	0.808162	rs6543224	A	G	0.0890411	3.41157	0.0006459	4.88582	1.03e-06	AC092568.1	14455	intergenic	6.508	6	9	15	0	0	0
4	2	104227871	rs6543224	104096271	rs11677232	0.808162	rs6543224	A	G	0.0890411	3.41157	0.0006459	4.88582	1.03e-06	AC092568.1	14427	intergenic	1.624	7	9	15	0	0	0
4	2	104227871	rs6543224	104097914	rs1579547	0.808162	rs6543224	T	C	0.0883962	3.41651	0.0006343	4.88016	1.06e-06	AC092568.1	12784	intergenic	6.24	6	9	15	0	0	0
4	2	104227871	rs6543224	104105609	rs13395153	0.827223	rs6543224	T	C	0.0574415	3.68961	0.0002246	4.69166	2.71e-06	AC092568.1	5089	intergenic	0.613	3a	9	15	0	0	0
4	2	104227871	rs6543224	104106404	rs7570677	0.827223	rs6543224	A	G	0.0587198	3.6771	0.0002359	4.69701	2.64e-06	AC092568.1	4294	intergenic	2.606	6	9	15	0	0	0
4	2	104227871	rs6543224	104107978	rs4380263	0.827223	rs6543224	G	A	0.0570629	3.69349	0.0002212	4.66474	3.09e-06	AC092568.1	2720	intergenic	3.091	6	9	15	0	0	0
4	2	104227871	rs6543224	104109681	rs1040123	0.827223	rs6543224	A	G	0.059309	3.67143	0.0002412	4.68941	2.74e-06	AC092568.1	1017	intergenic	5.414	7	9	15	0	0	0
4	2	104227871	rs6543224	104113458	rs6761396	0.827223	rs6543224	G	A	0.0420197	3.85485	0.0001158	4.67991	2.87e-06	AC092568.1	1157	intergenic	4.686	5	9	15	0	0	0
4	2	104227871	rs6543224	104113702	rs6751705	0.827223	rs6543224	T	G	0.0426629	3.84756	0.0001193	4.65884	3.18e-06	AC092568.1	1401	intergenic	0.886	7	9	15	0	0	0
4	2	104227871	rs6543224	104113747	rs6543211	0.827223	rs6543224	A	G	0.042001	3.85506	0.0001157	4.67991	2.87e-06	AC092568.1	1446	intergenic	1.936	6	9	15	0	0	0
4	2	104227871	rs6543224	104116970	rs6543214	0.837258	rs6543224	A	C	0.0362103	3.92439	8.695e-05	4.81392	1.48e-06	AC092568.1	4669	intergenic	1.042	6	9	15	0	0	0
4	2	104227871	rs6543224	104118605	rs6543215	0.829527	rs6543224	T	C	0.0356457	3.93175	8.433e-05	4.6947	2.67e-06	AC092568.1	6304	intergenic	0.129	7	9	15	0	0	0
4	2	104227871	rs6543224	104119652	rs1514998	0.833711	rs6543224	A	G	0.0352744	3.93658	8.265e-05	4.75751	1.96e-06	AC092568.1	7351	intergenic	3.15		9	15	0	0	0
4	2	104227871	rs6543224	104119885	rs4369880	0.833711	rs6543224	A	G	0.0352744	3.93658	8.265e-05	4.73321	2.21e-06	AC092568.1	7584	intergenic	0.889	7	9	15	0	0	0
4	2	104227871	rs6543224	104123234	rs7573399	0.833711	rs6543224	G	A	0.0352677	3.93667	8.262e-05	4.76484	1.89e-06	AC092568.1	10933	intergenic	1.462	5	9	15	0	0	0
4	2	104227871	rs6543224	104124146	rs17336454	0.833711	rs6543224	G	T	0.0352677	3.93667	8.262e-05	4.76699	1.87e-06	AC092568.1	11845	intergenic	0.17	7	9	15	0	0	0
4	2	104227871	rs6543224	104125396	rs4283441	0.833711	rs6543224	C	T	0.0361102	3.92569	8.648e-05	4.76591	1.88e-06	AC092568.1	13095	intergenic	1.793	7	9	15	0	0	0
4	2	104227871	rs6543224	104126983	rs1901477	0.833711	rs6543224	A	G	0.0359839	3.92734	8.589e-05	4.76916	1.85e-06	AC092568.1	14682	intergenic	1.591		9	15	0	0	0
4	2	104227871	rs6543224	104129328	rs7564071	0.833711	rs6543224	A	C	0.0359839	3.92734	8.589e-05	4.77805	1.77e-06	AC018880.1	14749	intergenic	2.437	6	9	15	0	0	0
4	2	104227871	rs6543224	104133885	rs1839893	0.833711	rs6543224	C	T	0.0361529	3.92514	8.668e-05	4.77805	1.77e-06	AC018880.1	10192	intergenic	2.102		9	15	0	0	0
4	2	104227871	rs6543224	104133966	rs1839892	0.833711	rs6543224	T	C	0.0361316	3.92542	8.658e-05	4.70977	2.48e-06	AC018880.1	10111	intergenic	11.93		9	15	0	0	0
4	2	104227871	rs6543224	104137154	rs7567562	0.833711	rs6543224	G	A	0.0367661	3.91769	8.94e-05	4.77245	1.82e-06	AC018880.1	6923	intergenic	1.987	7	9	15	0	0	0
4	2	104227871	rs6543224	104141171	rs2068081	0.825355	rs6543224	T	C	0.0371015	3.91365	9.091e-05	4.74745	2.06e-06	AC018880.1	2906	intergenic	0.62		7	15	0	0	0
4	2	104227871	rs6543224	104141293	rs7582785	0.833711	rs6543224	G	T	0.0360033	3.92709	8.598e-05	4.77245	1.82e-06	AC018880.1	2784	intergenic	0.313	6	7	15	0	0	0
4	2	104227871	rs6543224	104142699	rs7574952	0.833711	rs6543224	A	G	0.0355536	3.93295	8.391e-05	4.76167	1.92e-06	AC018880.1	1378	intergenic	0.868	6	5	15	0	0	0
4	2	104227871	rs6543224	104143998	rs1451982	0.833711	rs6543224	T	G	0.0348407	3.94222	8.073e-05	4.75545	1.98e-06	AC018880.1	79	upstream	2.905		5	15	0	0	0
4	2	104227871	rs6543224	104147753	rs6723416	0.833711	rs6543224	A	G	0.0339727	3.95349	7.702e-05	4.74164	2.12e-06	AC018880.1	2033	intergenic	4.263	5	7	15	0	0	0
4	2	104227871	rs6543224	104149830	rs1597743	0.833711	rs6543224	A	G	0.0329583	3.96662	7.29e-05	4.76167	1.92e-06	AC018880.1	4110	intergenic	1.138		9	15	0	0	0
4	2	104227871	rs6543224	104150233	rs1597742	0.823713	rs6543224	T	G	0.0338453	3.95514	7.649e-05	4.72073	2.35e-06	AC018880.1	4513	intergenic	1.092		9	15	0	0	0
4	2	104227871	rs6543224	104150891	rs6738833	0.833711	rs6543224	T	C	0.0329583	3.96662	7.29e-05	4.76916	1.85e-06	AC018880.1	5171	intergenic	1.407	6	9	15	0	0	0
4	2	104227871	rs6543224	104153212	rs7595711	0.825355	rs6543224	A	G	0.0391498	3.8889	0.0001007	4.79583	1.62e-06	AC018880.1	7492	intergenic	1.639	6	9	15	0	0	0
4	2	104227871	rs6543224	104153362	rs1597741	0.833711	rs6543224	T	G	0.0337315	3.95661	7.602e-05	4.73973	2.14e-06	AC018880.1	7642	intergenic	1.43		9	15	0	0	0
4	2	104227871	rs6543224	104155545	rs6734144	0.825355	rs6543224	A	G	0.0398917	3.8799	0.0001045	4.78974	1.67e-06	AC018880.1	9825	intergenic	8.165	6	9	15	0	0	0
4	2	104227871	rs6543224	104155913	rs10191724	0.833711	rs6543224	T	C	0.0329228	3.96708	7.276e-05	4.77467	1.8e-06	AC018880.1	10193	intergenic	2.712	7	9	15	0	0	0
4	2	104227871	rs6543224	104156821	rs11123960	0.833711	rs6543224	A	G	0.0319946	3.97905	6.919e-05	4.77919	1.76e-06	AC018880.1	11101	intergenic	3.847	6	9	15	0	0	0
4	2	104227871	rs6543224	104157067	rs11123963	0.833711	rs6543224	T	C	0.0315788	3.98465	6.758e-05	4.79215	1.65e-06	AC018880.1	11347	intergenic	0.467	7	9	15	0	0	0
4	2	104227871	rs6543224	104159202	rs2198234	0.878609	rs6543224	G	T	0.0267986	4.0527	5.063e-05	4.83975	1.3e-06	AC018880.1	13482	intergenic	0.952		9	15	0	0	0
4	2	104227871	rs6543224	104159785	rs4851029	0.886554	rs6543224	T	G	0.0237305	4.0998	4.135e-05	4.80339	1.56e-06	AC018880.1	14065	intergenic	0.111	6	9	15	0	0	0
4	2	104227871	rs6543224	104160383	rs10168817	0.880531	rs6543224	G	A	0.060344	3.66144	0.0002508	4.79337	1.64e-06	AC018880.1	14663	intergenic	2.208	7	9	15	0	0	0
4	2	104227871	rs6543224	104163187	rs6721892	0.992183	rs6543224	G	A	0.0241678	4.09269	4.264e-05	5.02402	5.06e-07	AC018880.1	17467	intergenic	3.478	6	9	15	0	0	0
4	2	104227871	rs6543224	104164439	rs1983305	0.99608	rs6543224	T	C	0.0251689	4.07751	4.552e-05	5.04564	4.52e-07	AC018880.1	18719	intergenic	0.371		9	15	0	0	0
4	2	104227871	rs6543224	104164950	rs4851031	0.992183	rs6543224	A	G	0.0243108	4.09052	4.304e-05	5.04104	4.63e-07	AC018880.1	19230	intergenic	1.099	7	9	15	0	0	0
4	2	104227871	rs6543224	104165751	rs2167542	0.980556	rs6543224	A	G	0.0245929	4.08625	4.384e-05	5.00695	5.53e-07	AC018880.1	20031	intergenic	2.063		9	15	0	0	0
4	2	104227871	rs6543224	104173664	rs1451974	0.99608	rs6543224	C	T	0.026023	4.06453	4.813e-05	5.10545	3.3e-07	AC018880.1	27944	intergenic	0.339		9	15	0	0	0
4	2	104227871	rs6543224	104178377	rs7580027	0.992183	rs6543224	T	G	0.0247977	4.08315	4.443e-05	5.00975	5.45e-07	AC018880.1	32657	intergenic	0.164	7	9	15	0	0	0
4	2	104227871	rs6543224	104179160	rs6733755	0.992183	rs6543224	T	C	0.0247977	4.08315	4.443e-05	5.00487	5.59e-07	AC018880.1	33440	intergenic	1.953	7	9	15	0	0	0
4	2	104227871	rs6543224	104183265	rs6543217	0.992183	rs6543224	A	G	0.0249316	4.08112	4.482e-05	4.99057	6.02e-07	AC018880.1	37545	intergenic	5.267	6	9	15	0	0	0
4	2	104227871	rs6543224	104183537	rs6543218	0.992183	rs6543224	A	C	0.0249316	4.08112	4.482e-05	4.99643	5.84e-07	AC018880.1	37817	intergenic	1.127	7	9	15	0	0	0
4	2	104227871	rs6543224	104186652	rs13411937	0.992183	rs6543224	A	G	0.0260357	4.06433	4.817e-05	5.0448	4.54e-07	AC018880.1	40932	intergenic	9.791	6	9	15	0	0	0
4	2	104227871	rs6543224	104191900	rs2375766	0.99608	rs6543224	G	A	0.0245754	4.08652	4.379e-05	5.05165	4.38e-07	AC018880.1	46180	intergenic	1.206	7	9	15	0	0	0
4	2	104227871	rs6543224	104192377	rs7559489	0.99608	rs6543224	T	C	0.0262284	4.0614	4.878e-05	5.06754	4.03e-07	AC018880.1	46657	intergenic	3.079	6	9	15	0	0	0
4	2	104227871	rs6543224	104192887	rs7569356	0.94702	rs6543224	G	A	0.0594843	3.66974	0.0002428	4.86753	1.13e-06	AC018880.1	47167	intergenic	6.293	7	9	15	0	0	0
4	2	104227871	rs6543224	104195719	rs6543220	0.99608	rs6543224	A	C	0.0254126	4.07381	4.625e-05	5.07329	3.91e-07	AC018880.2	44368	intergenic	2.897	6	9	15	0	0	0
4	2	104227871	rs6543224	104195755	rs6738539	0.99608	rs6543224	C	T	0.0250643	4.0791	4.521e-05	5.05035	4.41e-07	AC018880.2	44332	intergenic	1.726	7	9	15	0	0	0
4	2	104227871	rs6543224	104196439	rs7591265	0.992183	rs6543224	C	T	0.02298	4.11238	3.916e-05	5.03136	4.87e-07	AC018880.2	43648	intergenic	5.032	7	9	15	0	0	0
4	2	104227871	rs6543224	104198288	rs2084814	0.99608	rs6543224	T	C	0.0242216	4.09187	4.279e-05	5.00765	5.51e-07	AC018880.2	41799	intergenic	0.559		9	15	0	0	0
4	2	104227871	rs6543224	104199025	rs6711344	0.976714	rs6543224	A	G	0.0232624	4.10765	3.997e-05	4.93537	8e-07	AC018880.2	41062	intergenic	0.748	7	9	15	0	0	0
4	2	104227871	rs6543224	104202712	rs6727525	0.992183	rs6543224	T	G	0.0238368	4.09802	4.167e-05	5.02593	5.01e-07	AC018880.2	37375	intergenic	0.811	6	9	15	0	0	0
4	2	104227871	rs6543224	104203679	rs6543222	0.992183	rs6543224	T	C	0.022558	4.11944	3.798e-05	4.86753	1.13e-06	AC018880.2	36408	intergenic	0.689	7	9	15	0	0	0
4	2	104227871	rs6543224	104204520	rs1869073	0.99608	rs6543224	T	C	0.0261624	4.0624	4.857e-05	5.22305	1.76e-07	AC018880.2	35567	intergenic	0.033		9	15	0	0	0
4	2	104227871	rs6543224	104204603	rs1869072	0.94702	rs6543224	G	A	0.0579904	3.68411	0.0002295	4.95268	7.32e-07	AC018880.2	35484	intergenic	0.026		9	15	0	0	0
4	2	104227871	rs6543224	104207059	rs6725382	0.94702	rs6543224	T	C	0.0534979	3.72984	0.0001916	4.89362	9.9e-07	AC018880.2	33028	intergenic	1.742	6	9	15	0	0	0
4	2	104227871	rs6543224	104207776	rs2100330	0.94702	rs6543224	A	G	0.0550176	3.71438	0.0002037	4.89743	9.71e-07	AC018880.2	32311	intergenic	4.067		9	15	0	0	0
4	2	104227871	rs6543224	104209003	rs10188273	0.642135	rs6543224	T	C	0.0464235	3.80483	0.0001419	4.37759	1.2e-05	AC018880.2	31084	intergenic	1.779	7	9	15	0	0	0
4	2	104227871	rs6543224	104212231	rs1597749	0.651761	rs6543224	T	C	0.0468125	3.80068	0.0001443	4.38876	1.14e-05	AC018880.2	27856	intergenic	2.026	7	9	15	0	0	0
4	2	104227871	rs6543224	104212873	rs10207229	0.94702	rs6543224	G	A	0.0517323	3.74779	0.0001784	4.88774	1.02e-06	AC018880.2	27214	intergenic	2.518	7	9	15	0	0	0
4	2	104227871	rs6543224	104215251	rs2044934	0.99608	rs6543224	T	G	0.020596	4.15234	3.291e-05	5.03136	4.87e-07	AC018880.2	24836	intergenic	0.152		9	15	0	0	0
4	2	104227871	rs6543224	104219240	rs10189533	0.99608	rs6543224	C	A	0.018996	4.18197	2.89e-05	5.0087	5.48e-07	AC018880.2	20847	intergenic	1.066	6	9	15	0	0	0
4	2	104227871	rs6543224	104219692	rs1451986	0.943129	rs6543224	G	A	0.0444185	3.8276	0.0001294	4.83522	1.33e-06	AC018880.2	20395	intergenic	0.394	6	9	15	0	0	0
4	2	104227871	rs6543224	104220242	rs7560924	0.94702	rs6543224	G	A	0.0475869	3.7924	0.0001492	4.85236	1.22e-06	AC018880.2	19845	intergenic	4.113	7	9	15	0	0	0
4	2	104227871	rs6543224	104222589	rs1451988	0.992183	rs6543224	A	G	0.0184203	4.19258	2.758e-05	4.98961	6.05e-07	AC018880.2	17498	intergenic	1.295	6	9	15	0	0	0
4	2	104227871	rs6543224	104226645	rs13428758	0.94702	rs6543224	A	G	0.0477881	3.79024	0.0001505	4.85897	1.18e-06	AC018880.2	13442	intergenic	3.29	6	9	15	0	0	0
4	2	104227871	rs6543224	104227258	rs7608358	0.94702	rs6543224	A	G	0.0477881	3.79024	0.0001505	4.85897	1.18e-06	AC018880.2	12829	intergenic	0.85	7	9	15	0	0	0
4	2	104227871	rs6543224	104227395	rs7558335	0.992183	rs6543224	T	C	0.0186196	4.18891	2.803e-05	5.01153	5.4e-07	AC018880.2	12692	intergenic	1.938	7	9	15	0	0	0
4	2	104227871	rs6543224	104227869	rs6543223	0.984415	rs6543224	T	C	0.0152457	4.25656	2.076e-05	4.85399	1.21e-06	AC018880.2	12218	intergenic	2.307	7	9	15	0	0	0
4	2	104227871	rs6543224	104227871	rs6543224	1	rs6543224	C	T	0.0151149	4.25927	2.051e-05	5.0144	5.32e-07	AC018880.2	12216	intergenic	1.644	7	9	15	0	0	0
4	2	104227871	rs6543224	104228863	rs13396809	0.992183	rs6543224	G	A	0.018389	4.19316	2.751e-05	5.08481	3.68e-07	AC018880.2	11224	intergenic	1.224	7	9	15	0	0	0
4	2	104227871	rs6543224	104229299	rs13426115	0.94702	rs6543224	C	T	0.0493522	3.77346	0.000161	4.92607	8.39e-07	AC018880.2	10788	intergenic	0.714	6	9	15	0	0	0
4	2	104227871	rs6543224	104231852	rs7583069	0.943315	rs6543224	G	A	0.0477418	3.79074	0.0001502	4.91081	9.07e-07	AC018880.2	8235	intergenic	1.396	6	9	15	0	0	0
4	2	104227871	rs6543224	104233265	rs10185978	0.992144	rs6543224	T	C	0.019764	4.16777	3.076e-05	5.09056	3.57e-07	AC018880.2	6822	intergenic	0.24	5	9	15	0	0	0
4	2	104227871	rs6543224	104233274	rs10194188	0.943315	rs6543224	G	A	0.0477418	3.79074	0.0001502	4.90781	9.21e-07	AC018880.2	6813	intergenic	1.08	5	9	15	0	0	0
4	2	104227871	rs6543224	104234628	rs1823673	0.943315	rs6543224	T	C	0.0477418	3.79074	0.0001502	4.92215	8.56e-07	AC018880.2	5459	intergenic	10.18	6	9	15	0	0	0
4	2	104227871	rs6543224	104236822	rs12328095	0.992144	rs6543224	G	A	0.0204756	4.15457	3.259e-05	5.09704	3.45e-07	AC018880.2	3265	intergenic	5.209	7	9	15	0	0	0
4	2	104227871	rs6543224	104238501	rs6719978	0.97656	rs6543224	G	A	0.0179145	4.20189	2.647e-05	5.0298	4.91e-07	AC018880.2	1586	intergenic	0.242	5	9	15	0	0	0
4	2	104227871	rs6543224	104239736	rs1584705	0.992144	rs6543224	T	C	0.0195622	4.1715	3.026e-05	5.09981	3.4e-07	AC018880.2	351	upstream	2.556	6	9	15	0	0	0
4	2	104227871	rs6543224	104240205	rs11123965	0.988235	rs6543224	T	C	0.0165698	4.22932	2.344e-05	5.04949	4.43e-07	AC018880.2	0	ncRNA_exonic	2.172	7	9	15	0	0	0
4	2	104227871	rs6543224	104240420	rs11888473	0.988225	rs6543224	T	C	0.0193488	4.17545	2.974e-05	5.11971	3.06e-07	AC018880.2	131	downstream	0.167	7	9	15	0	0	0
4	2	104227871	rs6543224	104242306	rs7585415	0.992144	rs6543224	G	A	0.019776	4.16754	3.079e-05	5.10834	3.25e-07	AC018880.2	2017	intergenic	1.352	7	9	15	0	0	0
4	2	104227871	rs6543224	104242721	rs7576621	0.988235	rs6543224	T	G	0.0184471	4.19209	2.764e-05	5.09324	3.52e-07	AC018880.2	2432	intergenic	1.991	6	9	15	0	0	0
4	2	104227871	rs6543224	104242980	rs10184977	0.943315	rs6543224	T	C	0.0477418	3.79074	0.0001502	4.91942	8.68e-07	AC018880.2	2691	intergenic	2.111	6	9	15	0	0	0
4	2	104227871	rs6543224	104242992	rs10182416	0.943315	rs6543224	A	G	0.0477418	3.79074	0.0001502	4.89262	9.95e-07	AC018880.2	2703	intergenic	1.857	7	9	15	0	0	0
4	2	104227871	rs6543224	104243220	rs10170544	0.97656	rs6543224	C	A	0.017807	4.20386	2.624e-05	5.03534	4.77e-07	AC018880.2	2931	intergenic	0.813	7	9	15	0	0	0
4	2	104227871	rs6543224	104243331	rs10193525	0.943315	rs6543224	G	A	0.0477418	3.79074	0.0001502	4.92215	8.56e-07	AC018880.2	3042	intergenic	0.102	6	9	15	0	0	0
4	2	104227871	rs6543224	104243342	rs10182738	0.992144	rs6543224	A	G	0.0191694	4.17876	2.931e-05	5.04777	4.47e-07	AC018880.2	3053	intergenic	1.57	6	9	15	0	0	0
4	2	104227871	rs6543224	104243508	rs10193705	0.992144	rs6543224	G	A	0.019776	4.16754	3.079e-05	5.08481	3.68e-07	AC018880.2	3219	intergenic	1.311	6	9	15	0	0	0
4	2	104227871	rs6543224	104244081	rs1304360	0.94702	rs6543224	C	T	0.0463908	3.80518	0.0001417	4.927	8.35e-07	AC018880.2	3792	intergenic	2.311		9	15	0	0	0
4	2	104227871	rs6543224	104245978	rs4851661	0.94702	rs6543224	C	A	0.0469087	3.79965	0.0001449	4.91168	9.03e-07	AC018880.2	5689	intergenic	1.499	6	9	15	0	0	0
4	2	104227871	rs6543224	104248576	rs1597746	0.94702	rs6543224	C	T	0.0457615	3.81226	0.0001377	4.90028	9.57e-07	AC018880.2	8287	intergenic	0.846		1	15	0	0	0
4	2	104227871	rs6543224	104249538	rs4441492	0.992183	rs6543224	A	G	0.0172811	4.21462	2.502e-05	5.13311	2.85e-07	AC018880.2	9249	intergenic	1.605	7	9	15	0	0	0
4	2	104227871	rs6543224	104250376	rs6543227	0.94702	rs6543224	A	G	0.0446674	3.82476	0.0001309	4.92033	8.64e-07	AC018880.2	10087	intergenic	7.492	7	9	15	0	0	0
4	2	104227871	rs6543224	104251732	rs1901481	0.992144	rs6543224	T	C	0.0193529	4.17537	2.975e-05	5.07821	3.81e-07	AC018880.2	11443	intergenic	0.112		9	15	0	0	0
4	2	104227871	rs6543224	104253005	rs1901480	0.94702	rs6543224	G	A	0.0324372	3.97335	7.087e-05	4.94131	7.76e-07	AC018880.2	12716	intergenic	0.565		9	15	0	0	0
4	2	104227871	rs6543224	104253101	rs1901479	0.94702	rs6543224	T	C	0.0448482	3.8227	0.000132	4.94031	7.8e-07	AC018880.2	12812	intergenic	0.095		9	15	0	0	0
4	2	104227871	rs6543224	104253461	rs10198643	0.99608	rs6543224	A	C	0.0174326	4.21148	2.537e-05	5.12918	2.91e-07	AC018880.2	13172	intergenic	7.39	6	9	15	0	0	0
4	2	104227871	rs6543224	104254564	rs264963	0.943315	rs6543224	G	A	0.0425176	3.84921	0.0001185	4.93733	7.92e-07	AC018880.2	14275	intergenic	1.395	5	9	15	0	0	0
4	2	104227871	rs6543224	104255500	rs264964	0.943129	rs6543224	A	G	0.0472739	3.79575	0.0001472	4.93931	7.84e-07	AC018880.2	15211	intergenic	0.891		9	15	0	0	0
4	2	104227871	rs6543224	104255919	rs264965	0.99608	rs6543224	A	C	0.0167085	4.22646	2.374e-05	5.12282	3.01e-07	AC018880.2	15630	intergenic	0.658	7	9	15	0	0	0
4	2	104227871	rs6543224	104255937	rs264966	0.99608	rs6543224	C	T	0.0176917	4.20611	2.598e-05	5.09163	3.55e-07	AC018880.2	15648	intergenic	1.064	7	9	15	0	0	0
4	2	104227871	rs6543224	104256215	rs264967	0.94702	rs6543224	A	G	0.0448482	3.8227	0.000132	5.05429	4.32e-07	AC018880.2	15926	intergenic	1.299		9	15	0	0	0
4	2	104227871	rs6543224	104256567	rs264968	0.94702	rs6543224	G	A	0.0448155	3.82307	0.0001318	4.94307	7.69e-07	AC018880.2	16278	intergenic	2.002		9	15	0	0	0
4	2	104227871	rs6543224	104257915	rs264969	0.94702	rs6543224	G	T	0.0457928	3.8119	0.0001379	4.927	8.35e-07	AC018880.2	17626	intergenic	1.589		9	15	0	0	0
4	2	104227871	rs6543224	104258261	rs264970	0.99608	rs6543224	C	T	0.018496	4.19119	2.775e-05	5.12282	3.01e-07	AC018880.2	17972	intergenic	1.867		9	15	0	0	0
4	2	104227871	rs6543224	104259981	rs264972	0.99608	rs6543224	T	G	0.0188933	4.18386	2.866e-05	5.13245	2.86e-07	AC018880.2	19692	intergenic	0.61		9	15	0	0	0
4	2	104227871	rs6543224	104260702	rs1457458	0.94702	rs6543224	C	T	0.0459645	3.80994	0.000139	4.96109	7.01e-07	AC018880.2	20413	intergenic	1.281	6	9	15	0	0	0
4	2	104227871	rs6543224	104261180	rs1669607	0.94702	rs6543224	C	T	0.0483062	3.78469	0.0001539	4.96986	6.7e-07	AC018880.2	20891	intergenic	0.017	7	9	15	0	0	0
4	2	104227871	rs6543224	104264825	rs1669602	0.988235	rs6543224	T	C	0.0193115	4.17614	2.965e-05	5.08688	3.64e-07	AC018880.2	24536	intergenic	9.584	5	9	15	0	0	0
4	2	104227871	rs6543224	104264977	rs1673464	0.988235	rs6543224	T	C	0.0193115	4.17614	2.965e-05	5.07821	3.81e-07	AC018880.2	24688	intergenic	1.486	5	9	15	0	0	0
4	2	104227871	rs6543224	104265522	rs1673465	0.943315	rs6543224	A	G	0.0477727	3.79041	0.0001504	4.97161	6.64e-07	AC018880.2	25233	intergenic	2.073	7	7	15	0	0	0
4	2	104227871	rs6543224	104265569	rs1673466	0.943315	rs6543224	G	A	0.0477881	3.79024	0.0001505	4.98026	6.35e-07	AC018880.2	25280	intergenic	0.558	6	7	15	0	0	0
4	2	104227871	rs6543224	104266788	rs1673468	0.984346	rs6543224	C	T	0.0215723	4.13588	3.536e-05	4.98866	6.08e-07	AC018880.2	26499	intergenic	2.488	7	9	15	0	0	0
4	2	104227871	rs6543224	104267572	rs67716713	0.936202	rs6543224	A	C	0.0520307	3.74471	0.0001806	4.83823	1.31e-06	AC018880.2	27283	intergenic	0.973	7	9	15	0	0	0
4	2	104227871	rs6543224	104268301	rs264975	0.988235	rs6543224	A	G	0.019102	4.18001	2.915e-05	5.04777	4.47e-07	AC018880.2	28012	intergenic	0.021		9	15	0	0	0
4	2	104227871	rs6543224	104268557	rs264976	0.939626	rs6543224	T	C	0.047649	3.79173	0.0001496	4.96699	6.8e-07	AC018880.2	28268	intergenic	1.105		9	15	0	0	0
4	2	104227871	rs6543224	104268754	rs264977	0.992144	rs6543224	C	T	0.0189319	4.18315	2.875e-05	5.09595	3.47e-07	AC018880.2	28465	intergenic	8.361	6	9	15	0	0	0
4	2	104227871	rs6543224	104268790	rs264978	0.988235	rs6543224	A	C	0.019102	4.18001	2.915e-05	5.06287	4.13e-07	AC018880.2	28501	intergenic	0.607	6	9	15	0	0	0
4	2	104227871	rs6543224	104269979	rs264980	0.988235	rs6543224	T	C	0.019102	4.18001	2.915e-05	5.06195	4.15e-07	AC018880.2	29690	intergenic	3.567		9	15	0	0	0
4	2	104227871	rs6543224	104271686	rs264919	0.939413	rs6543224	A	C	0.0474153	3.79423	0.0001481	4.89926	9.62e-07	AC018880.2	31397	intergenic	0.555	7	9	15	0	0	0
4	2	104227871	rs6543224	104273554	rs264921	0.932302	rs6543224	G	A	0.0518238	3.74681	0.0001791	4.77245	1.82e-06	AC018880.2	33265	intergenic	1.838	6	9	15	0	0	0
4	2	104227871	rs6543224	104273996	rs264922	0.932302	rs6543224	G	A	0.0518238	3.74681	0.0001791	4.76916	1.85e-06	AC018880.2	33707	intergenic	3.369	7	9	15	0	0	0
4	2	104227871	rs6543224	104275976	rs264923	0.98044	rs6543224	T	C	0.022973	4.1125	3.914e-05	4.91255	8.99e-07	AC018880.2	35687	intergenic	0.025	6	9	15	0	0	0
4	2	104227871	rs6543224	104276502	rs171939	0.98044	rs6543224	G	A	0.0218197	4.13176	3.6e-05	4.9327	8.11e-07	AC018880.2	36213	intergenic	5.503	6	9	15	0	0	0
4	2	104227871	rs6543224	104278688	rs264925	0.98044	rs6543224	G	A	0.0221378	4.12645	3.684e-05	4.92794	8.31e-07	AC018880.2	38399	intergenic	3.595	6	9	15	0	0	0
4	2	104227871	rs6543224	104279490	rs264926	0.988235	rs6543224	A	C	0.0192072	4.17806	2.94e-05	5.05165	4.38e-07	AC018880.2	39201	intergenic	0.178	5	9	15	0	0	0
4	2	104227871	rs6543224	104281272	rs264927	0.870835	rs6543224	C	T	0.0457928	3.8119	0.0001379	4.95833	7.11e-07	AC018880.2	40983	intergenic	1.22	5	7	15	0	0	0
4	2	104227871	rs6543224	104283391	rs264929	0.900071	rs6543224	C	T	0.0347031	3.94401	8.013e-05	4.94206	7.73e-07	AC018880.2	43102	intergenic	0.452	6	5	15	0	0	0
4	2	104227871	rs6543224	104285180	rs264930	0.899192	rs6543224	C	T	0.0355316	3.93324	8.381e-05	5.14188	2.72e-07	AC018880.2	44891	intergenic	0.359	5	5	15	0	0	0
4	2	104227871	rs6543224	104285359	rs264931	0.900071	rs6543224	A	G	0.0354278	3.93459	8.334e-05	4.93832	7.88e-07	AC018880.2	45070	intergenic	1.556	7	5	15	0	0	0
4	2	104227871	rs6543224	104292134	rs264933	0.840976	rs6543224	C	T	0.077747	3.50291	0.0004602	4.59392	4.35e-06	AC018880.2	51845	intergenic	0.678	7	5	15	0	0	0
4	2	104227871	rs6543224	104295741	rs264935	0.900071	rs6543224	T	C	0.0352588	3.93679	8.258e-05	5.0087	5.48e-07	AC018880.2	55452	intergenic	2.365	7	5	15	0	0	0
4	2	104227871	rs6543224	104295747	rs264936	0.899192	rs6543224	A	G	0.0355448	3.93306	8.387e-05	4.97723	6.45e-07	AC018880.2	55458	intergenic	2.177	7	5	15	0	0	0
4	2	104227871	rs6543224	104296570	rs264937	0.895837	rs6543224	A	G	0.0358481	3.92911	8.526e-05	4.96585	6.84e-07	AC018880.2	56281	intergenic	0.389	7	7	15	0	0	0
4	2	104227871	rs6543224	104296743	rs264938	0.903418	rs6543224	C	T	0.036251	3.92389	8.713e-05	4.95056	7.4e-07	AC018880.2	56454	intergenic	0.887	7	7	15	0	0	0
4	2	104227871	rs6543224	104297247	rs264940	0.903418	rs6543224	C	A	0.036251	3.92389	8.713e-05	4.95643	7.18e-07	AC018880.2	56958	intergenic	1.851	6	9	15	0	0	0
4	2	104227871	rs6543224	104297420	rs264941	0.848994	rs6543224	A	C	0.0719808	3.55311	0.0003807	4.75648	1.97e-06	AC018880.2	57131	intergenic	0.352	7	9	15	0	0	0
4	2	104227871	rs6543224	104298619	rs264944	0.848346	rs6543224	C	T	0.0697233	3.57338	0.0003524	4.77134	1.83e-06	AC018880.2	58330	intergenic	3.167	7	9	15	0	0	0
4	2	104227871	rs6543224	104298784	rs264945	0.900071	rs6543224	T	C	0.0338284	3.95536	7.642e-05	4.96026	7.04e-07	AC018880.2	58495	intergenic	0.203	7	9	15	0	0	0
4	2	104227871	rs6543224	104298906	rs264946	0.900071	rs6543224	C	T	0.0343872	3.94811	7.877e-05	4.97249	6.61e-07	AC018880.2	58617	intergenic	0.543	7	9	15	0	0	0
4	2	104227871	rs6543224	104299089	rs264947	0.900071	rs6543224	A	G	0.033391	3.96102	7.463e-05	4.96785	6.77e-07	AC018880.2	58800	intergenic	3.578	6	9	15	0	0	0
4	2	104227871	rs6543224	104301541	rs264948	0.844499	rs6543224	T	C	0.0660885	3.6068	0.00031	4.75041	2.03e-06	AC018880.2	61252	intergenic	2.689	7	9	15	0	0	0
4	2	104227871	rs6543224	104302490	rs264949	0.844499	rs6543224	C	T	0.0678526	3.59061	0.0003299	4.76272	1.91e-06	AC018880.2	62201	intergenic	3.043	7	9	15	0	0	0
4	2	104227871	rs6543224	104302935	rs264950	0.896477	rs6543224	C	T	0.0332795	3.96246	7.418e-05	4.95162	7.36e-07	AC018880.2	62646	intergenic	2.439	6	9	15	0	0	0
4	2	104227871	rs6543224	104303008	rs264951	0.900071	rs6543224	A	G	0.0321327	3.97727	6.971e-05	4.97455	6.54e-07	AC018880.2	62719	intergenic	1.547	7	9	15	0	0	0
4	2	104227871	rs6543224	104303311	rs264952	0.900071	rs6543224	C	T	0.0365838	3.91989	8.859e-05	4.8573	1.19e-06	AC018880.2	63022	intergenic	13.21	6	9	15	0	0	0
4	2	104227871	rs6543224	104304216	rs264954	0.896477	rs6543224	T	C	0.0331296	3.9644	7.358e-05	4.86065	1.17e-06	AC018880.2	63927	intergenic	0.453	7	9	15	0	0	0
4	2	104227871	rs6543224	104305359	rs264956	0.895571	rs6543224	G	A	0.0328109	3.96852	7.232e-05	4.95535	7.22e-07	AC018880.2	65070	intergenic	2.971	6	9	15	0	0	0
4	2	104227871	rs6543224	104305595	rs264957	0.8704	rs6543224	T	C	0.0419449	3.8557	0.0001154	4.78149	1.74e-06	AC018880.2	65306	intergenic	1.526	7	9	15	0	0	0
4	2	104227871	rs6543224	104306016	rs264958	0.896477	rs6543224	T	C	0.0331296	3.9644	7.358e-05	4.90696	9.25e-07	AC018880.2	65727	intergenic	0.406	6	9	15	0	0	0
4	2	104227871	rs6543224	104307810	rs264961	0.895571	rs6543224	T	G	0.0346869	3.94422	8.006e-05	4.97337	6.58e-07	AC018880.2	67521	intergenic	1.387	6	9	15	0	0	0
4	2	104227871	rs6543224	104311652	rs34830911	0.895571	rs6543224	C	T	0.0336805	3.95727	7.581e-05	4.9154	8.86e-07	AC018880.2	71363	intergenic	1.211	6	9	15	0	0	0
4	2	104227871	rs6543224	104311653	rs58565191	0.896477	rs6543224	A	G	0.0332446	3.96292	7.404e-05	4.9174	8.77e-07	AC018880.2	71364	intergenic	0.714	6	9	15	0	0	0
4	2	104227871	rs6543224	104313050	rs13012802	0.896477	rs6543224	C	T	0.0332421	3.96295	7.403e-05	4.96388	6.91e-07	AC018880.2	72761	intergenic	6.069	6	9	15	0	0	0
4	2	104227871	rs6543224	104313670	rs13032605	0.896477	rs6543224	T	C	0.0336805	3.95727	7.581e-05	4.95056	7.4e-07	AC018880.2	73381	intergenic	2.228	6	9	15	0	0	0
4	2	104227871	rs6543224	104314054	rs2085483	0.895571	rs6543224	T	G	0.0346523	3.94467	7.991e-05	4.96026	7.04e-07	AC018880.2	73765	intergenic	1.024	6	9	15	0	0	0
4	2	104227871	rs6543224	104314216	rs2085484	0.896477	rs6543224	A	G	0.0325203	3.97227	7.119e-05	4.95833	7.11e-07	AC018880.2	73927	intergenic	0.062	7	9	15	0	0	0
4	2	104227871	rs6543224	104317050	rs7589278	0.895571	rs6543224	G	A	0.0334872	3.95978	7.502e-05	4.96957	6.71e-07	AC018880.2	76761	intergenic	1.279	6	9	15	0	0	0
4	2	104227871	rs6543224	104318287	rs12620969	0.896477	rs6543224	G	T	0.032816	3.96846	7.234e-05	4.97073	6.67e-07	AC018880.2	77998	intergenic	3.074	6	9	15	0	0	0
4	2	104227871	rs6543224	104318437	rs12621003	0.896477	rs6543224	C	T	0.032816	3.96846	7.234e-05	4.97337	6.58e-07	AC018880.2	78148	intergenic	0.044	6	9	15	0	0	0
4	2	104227871	rs6543224	104319881	rs921965	0.895571	rs6543224	A	G	0.0332197	3.96324	7.394e-05	4.97813	6.42e-07	AC018880.2	79592	intergenic	1.412	7	9	15	0	0	0
4	2	104227871	rs6543224	104320141	rs921967	0.895571	rs6543224	A	G	0.0330668	3.96521	7.333e-05	5.02785	4.96e-07	AC018880.2	79852	intergenic	0.595	6	9	15	0	0	0
4	2	104227871	rs6543224	104320510	rs11675245	0.895571	rs6543224	A	G	0.0396603	3.88271	0.0001033	4.96957	6.71e-07	AC018880.2	80221	intergenic	2.532	6	9	15	0	0	0
4	2	104227871	rs6543224	104324926	rs13012192	0.891619	rs6543224	G	A	0.0383691	3.89835	9.685e-05	5.04777	4.47e-07	AC018880.2	84637	intergenic	5.938	7	9	15	0	0	0
4	2	104227871	rs6543224	104329002	rs7564172	0.841049	rs6543224	C	T	0.0738921	3.53654	0.0004054	4.98866	6.08e-07	AC018880.2	88713	intergenic	2.005	7	9	15	0	0	0
4	2	104227871	rs6543224	104330042	rs1598777	0.841049	rs6543224	A	G	0.0759578	3.51856	0.0004339	4.81939	1.44e-06	AC018880.2	89753	intergenic	3.569	7	9	15	0	0	0
4	2	104227871	rs6543224	104333681	rs9789519	0.892513	rs6543224	G	A	0.0446674	3.82476	0.0001309	5.11787	3.09e-07	AC018880.2	93392	intergenic	1.293	7	9	9	0	0	0
4	2	104227871	rs6543224	104333924	rs1379428	0.841049	rs6543224	T	C	0.0774683	3.50535	0.000456	4.83823	1.31e-06	AC018880.2	93635	intergenic	1.064	6	9	9	0	0	0
4	2	104227871	rs6543224	104334010	rs1379429	0.892513	rs6543224	A	G	0.0391299	3.88914	0.0001006	5.05741	4.25e-07	AC018880.2	93721	intergenic	0.64	6	9	9	0	0	0
4	2	104227871	rs6543224	104335186	rs1947565	0.841049	rs6543224	A	G	0.0768281	3.51095	0.0004465	4.83672	1.32e-06	AC018880.2	94897	intergenic	0.7	7	9	15	0	0	0
4	2	104227871	rs6543224	104340412	rs9941537	0.892513	rs6543224	C	T	0.040196	3.8762	0.0001061	5.0583	4.23e-07	AC018880.2	100123	intergenic	1.298	6	9	15	0	0	0
4	2	104227871	rs6543224	104340676	rs6713896	0.892513	rs6543224	C	A	0.0391697	3.88866	0.0001008	5.05253	4.36e-07	AC018880.2	100387	intergenic	1.11	6	9	15	0	0	0
4	2	104227871	rs6543224	104341029	rs2125013	0.892513	rs6543224	C	T	0.0391697	3.88866	0.0001008	5.04692	4.49e-07	AC018880.2	100740	intergenic	1.673	7	9	15	0	0	0
4	2	104227871	rs6543224	104341997	rs12987855	0.892513	rs6543224	A	G	0.0391299	3.88914	0.0001006	5.03615	4.75e-07	AC018880.2	101708	intergenic	0.781	6	9	15	0	0	0
4	2	104227871	rs6543224	104342066	rs9941552	0.892513	rs6543224	G	A	0.0293956	4.01526	5.938e-05	5.03454	4.79e-07	AC018880.2	101777	intergenic	1.288	6	9	15	0	0	0
4	2	104227871	rs6543224	104345035	rs7602419	0.841713	rs6543224	T	C	0.0764306	3.51443	0.0004407	4.79958	1.59e-06	AC018880.2	104746	intergenic	0.471	7	9	15	0	0	0
4	2	104227871	rs6543224	104345435	rs4014034	0.892513	rs6543224	C	A	0.0409553	3.86696	0.0001102	5.04312	4.58e-07	AC018880.2	105146	intergenic	0.689	7	9	15	0	0	0
4	2	104227871	rs6543224	104345661	rs4014035	0.892513	rs6543224	G	A	0.0409553	3.86696	0.0001102	5.0583	4.23e-07	AC018880.2	105372	intergenic	1.225	6	9	15	0	0	0
4	2	104227871	rs6543224	104346788	rs12478719	0.841049	rs6543224	T	C	0.0771936	3.50776	0.0004519	4.76167	1.92e-06	AC018880.2	106499	intergenic	11.51	6	9	15	0	0	0
4	2	104227871	rs6543224	104347660	rs2219373	0.841049	rs6543224	G	A	0.0755557	3.52206	0.0004282	4.77245	1.82e-06	AC018880.2	107371	intergenic	4.209	6	9	15	0	0	0
4	2	104227871	rs6543224	104348025	rs12616436	0.892513	rs6543224	C	T	0.0476955	3.79124	0.0001499	4.99446	5.9e-07	AC018880.2	107736	intergenic	8.924	7	9	15	0	0	0
4	2	104227871	rs6543224	104349164	rs7564607	0.841049	rs6543224	T	C	0.0784994	3.49645	0.0004715	4.79707	1.61e-06	AC018880.2	108875	intergenic	9.65	6	9	15	0	0	0
4	2	104227871	rs6543224	104352495	rs12616219	0.841049	rs6543224	A	C	0.0793706	3.48935	0.0004842	4.77692	1.78e-06	AC018880.2	112206	intergenic	0.298	6	9	15	0	0	0
4	2	104227871	rs6543224	104361420	rs9308868	0.68244	rs6543224	A	G	0.0871925	3.42571	0.0006132	5.36444	8.12e-08	AC013727.1	112007	intergenic	0.024	6	5	15	0	0	0
4	2	104227871	rs6543224	104367424	rs1379430	0.67444	rs6543224	G	A	0.0976435	3.34704	0.0008168	5.21992	1.79e-07	AC013727.1	106003	intergenic	3.709	6	9	15	0	0	0
4	2	104227871	rs6543224	104374272	rs677522	0.83571	rs6543224	A	G	0.0482005	3.78582	0.0001532	5.06103	4.17e-07	AC013727.1	99155	intergenic	0.074		9	15	0	0	0
5	2	159466149	rs3771643	159424586	rs10933493	0.924729	rs3771643	T	C	0.0969242	-3.62703	0.0002867	-3.57368	0.000352	PKP4	0	intronic	0.13	6	5	15	1	0	0
5	2	159466149	rs3771643	159426300	rs2190390	0.924729	rs3771643	T	G	0.0946338	-3.63038	0.000283	-3.59371	0.000326	PKP4	0	intronic	2.9	6	5	15	1	0	0
5	2	159466149	rs3771643	159426661	rs3821290	0.92865	rs3771643	T	C	0.0923414	-3.65588	0.0002563	-3.58122	0.000342	PKP4	0	intronic	4.28	7	5	15	1	0	0
5	2	159466149	rs3771643	159430579	rs3771614	0.983364	rs3771643	G	T	0.0671674	3.66827	0.0002442	3.88578	0.000102	PKP4	0	intronic	0.327	4	5	15	1	0	0
5	2	159466149	rs3771643	159430991	rs3771616	0.983364	rs3771643	G	A	0.0680397	3.659	0.0002532	3.88818	0.000101	PKP4	0	intronic	2.603	7	5	15	1	0	0
5	2	159466149	rs3771643	159431031	rs3821291	0.983364	rs3771643	G	A	0.0675869	3.66452	0.0002478	3.88578	0.000102	PKP4	0	intronic	5.402	7	5	15	1	0	0
5	2	159466149	rs3771643	159431663	rs12473797	0.983364	rs3771643	C	T	0.0675869	3.66452	0.0002478	3.88578	0.000102	PKP4	0	intronic	1.404	5	5	15	1	0	0
5	2	159466149	rs3771643	159431842	rs3755408	0.979242	rs3771643	C	T	0.0769143	3.60001	0.0003182	3.85868	0.000114	PKP4	0	intronic	3.626	5	5	15	1	0	0
5	2	159466149	rs3771643	159436702	rs3755413	0.979306	rs3771643	G	A	0.0649126	3.68848	0.0002256	3.88578	0.000102	PKP4	0	intronic	2.279	7	4	5	1	0	0
5	2	159466149	rs3771643	159447509	rs11891131	0.983364	rs3771643	C	T	0.0680354	3.66483	0.0002475	3.87874	0.000105	PKP4	0	intronic	5.984	6	5	5	1	0	0
5	2	159466149	rs3771643	159448238	rs1465236	0.983364	rs3771643	A	G	0.0598891	3.72437	0.0001958	3.90455	9.44e-05	PKP4	0	intronic	0.555	7	5	5	1	0	0
5	2	159466149	rs3771643	159448926	rs3771631	0.983364	rs3771643	A	C	0.0687971	3.66628	0.0002461	3.8652	0.000111	PKP4	0	intronic	12.69	7	4	15	1	0	0
5	2	159466149	rs3771643	159454789	rs2051946	0.983364	rs3771643	G	T	0.0580132	3.72079	0.0001986	3.94083	8.12e-05	PKP4	0	intronic	4.948	7	5	5	1	0	0
5	2	159466149	rs3771643	159459863	rs2051947	0.991649	rs3771643	G	A	0.0550617	3.73529	0.0001875	3.96564	7.32e-05	PKP4	0	intronic	9.816	3a	4	5	1	0	0
5	2	159466149	rs3771643	159460807	rs10191923	0.983332	rs3771643	C	T	0.0634499	3.66984	0.0002427	3.93877	8.19e-05	PKP4	0	intronic	9.196	5	4	5	1	0	0
5	2	159466149	rs3771643	159460832	rs10191934	0.987524	rs3771643	G	T	0.0604552	3.70094	0.0002148	3.93413	8.35e-05	PKP4	0	intronic	3.903	5	4	5	1	0	0
5	2	159466149	rs3771643	159466149	rs3771643	1	rs3771643	C	T	0.0490196	3.79727	0.0001463	3.96662	7.29e-05	PKP4	0	intronic	5.385	7	5	5	1	0	0
5	2	159466149	rs3771643	159469420	rs3771647	0.991733	rs3771643	C	T	0.0498307	3.77423	0.0001605	3.99134	6.57e-05	PKP4	0	intronic	4.018	6	4	5	1	0	0
5	2	159466149	rs3771643	159476635	rs10180170	0.991649	rs3771643	C	T	0.0523461	3.76268	0.0001681	3.96629	7.3e-05	PKP4	0	intronic	7.237	7	4	5	1	0	0
5	2	159466149	rs3771643	159476732	rs10180277	0.987524	rs3771643	C	T	0.0536217	3.76447	0.0001669	3.94083	8.12e-05	PKP4	0	intronic	0.1	7	4	5	1	0	0
5	2	159466149	rs3771643	159527936	rs2528591	0.946683	rs3771643	C	T	0.0857116	3.67667	0.0002363	3.62676	0.000287	PKP4:AC005042.4	0:0	ncRNA_intronic	8.606	6	4	5	1	0	0
5	2	159466149	rs3771643	159545136	rs757925	0.719608	rs3771643	G	A	0.0803706	-3.48119	0.0004992	-4.0093	6.09e-05	AC005042.4:AC005042.5	0:0	ncRNA_intronic	2.291	7	5	15	1	0	0
5	2	159466149	rs3771643	159553686	rs2528604	0.66693	rs3771643	T	C	0.0548465	-3.71613	0.0002023	-4.48271	7.37e-06	AC005042.4:AC005042.5	0:0	ncRNA_intronic	5.536	6	5	15	0	0	0
6	2	215394416	rs12467438	215361613	rs4507103	0.677596	rs12467438	A	G	0.0575957	-3.68803	0.000226	4.46572	7.98e-06	AC107218.3:VWC2L	0:0	ncRNA_intronic	0.089	7	5	15	1	0	0
6	2	215394416	rs12467438	215361680	rs6435829	0.677596	rs12467438	A	G	0.0519068	-3.74597	0.0001797	4.52851	5.94e-06	AC107218.3:VWC2L	0:0	ncRNA_intronic	3.044	7	5	15	1	0	0
6	2	215394416	rs12467438	215374302	rs4673844	0.801198	rs12467438	T	C	0.0711222	-3.56053	0.0003701	4.60829	4.06e-06	AC107218.3:VWC2L	0:0	ncRNA_intronic	1.427	7	5	15	1	0	0
6	2	215394416	rs12467438	215374745	rs4673845	0.805275	rs12467438	T	G	0.0733777	-3.54101	0.0003986	4.59975	4.23e-06	AC107218.3:VWC2L	0:0	ncRNA_intronic	0.576	7	14	15	1	0	0
6	2	215394416	rs12467438	215375059	rs4673846	0.808608	rs12467438	T	C	0.0728468	-3.54561	0.0003917	4.63209	3.62e-06	AC107218.3:VWC2L:VWC2L-IT1	0:0:0	ncRNA_intronic	5.957	5	14	15	1	0	0
6	2	215394416	rs12467438	215376176	rs12694336	0.801955	rs12467438	A	G	0.0725974	-3.54777	0.0003885	4.55018	5.36e-06	AC107218.3:VWC2L:VWC2L-IT1	0:0:0	ncRNA_intronic	5.49	7	9	15	1	0	0
6	2	215394416	rs12467438	215381176	rs4672708	0.89749	rs12467438	A	G	0.0783182	-3.49792	0.0004689	4.68134	2.85e-06	AC107218.3:VWC2L:VWC2L-IT1	0:0:0	ncRNA_intronic	1.11	7	9	15	1	0	0
6	2	215394416	rs12467438	215381858	rs4673849	0.89749	rs12467438	G	T	0.0748953	-3.52782	0.000419	4.54361	5.53e-06	AC107218.3:VWC2L:VWC2L-IT1	0:0:0	ncRNA_intronic	1.213	7	9	15	1	0	0
6	2	215394416	rs12467438	215382672	rs4672709	0.90809	rs12467438	T	C	0.0892607	-3.40989	0.0006499	4.47898	7.5e-06	AC107218.3:VWC2L:VWC2L-IT1	0:0:0	ncRNA_intronic	0.123	6	9	15	1	0	0
6	2	215394416	rs12467438	215390537	rs10197508	0.99254	rs12467438	T	G	0.0466997	-3.80188	0.0001436	4.03415	5.48e-05	AC107218.3:VWC2L:VWC2L-IT1	0:0:0	ncRNA_intronic	2.296	7	14	15	1	0	0
6	2	215394416	rs12467438	215390826	rs10165712	0.99254	rs12467438	A	C	0.0496954	-3.76977	0.0001634	4.1157	3.86e-05	AC107218.3:VWC2L:VWC2L-IT1	0:0:0	ncRNA_intronic	0.458	6	14	15	1	0	0
6	2	215394416	rs12467438	215394416	rs12467438	1	rs12467438	A	G	0.0437229	-3.83552	0.0001253	4.28227	1.85e-05	AC107218.3:VWC2L:VWC2L-IT1	0:0:0	ncRNA_intronic	9.507	5	5	15	1	0	0
6	2	215394416	rs12467438	215394451	rs12471719	0.996271	rs12467438	G	T	0.0502424	-3.76388	0.0001673	4.35511	1.33e-05	AC107218.3:VWC2L:VWC2L-IT1	0:0:0	ncRNA_intronic	11.88	5	5	15	1	0	0
6	2	215394416	rs12467438	215404525	rs10192241	0.941759	rs12467438	T	C	0.053316	-3.73169	0.0001902	4.08913	4.33e-05	AC107218.3:VWC2L	0:0	ncRNA_intronic	0.264	7	5	15	1	0	0
7	3	16852736	rs7625233	16851202	rs748832	0.995885	rs7625233	G	A	0.0488425	3.77894	0.0001575	-6.43072	1.27e-10	PLCL2	0		11.85		2	15	1	0	0
7	3	16852736	rs7625233	16851755	rs6800583	0.991751	rs7625233	A	G	0.0468446	3.80034	0.0001445	-6.38358	1.73e-10	PLCL2	0		10.77	4	2	15	1	0	0
7	3	16852736	rs7625233	16852736	rs7625233	1	rs7625233	G	A	0.0416053	3.85954	0.0001136	-6.37497	1.83e-10	PLCL2	0		9.089	5	1	15	1	0	0
7	3	16852736	rs7625233	16856216	rs11918777	0.963775	rs7625233	C	A	0.0696023	3.5745	0.0003509	-6.49219	8.46e-11	PLCL2	0		0.303	7	5	15	1	0	0
7	3	16852736	rs7625233	16856682	rs9813513	0.963775	rs7625233	C	T	0.0645957	3.62044	0.0002941	-6.44317	1.17e-10	PLCL2	0		1.166	5	5	15	1	0	0
7	3	16852736	rs7625233	16862873	rs9846711	0.925726	rs7625233	T	C	0.0982581	3.34266	0.0008298	-6.43933	1.2e-10	PLCL2	0		7.557	5	5	15	1	0	0
7	3	16852736	rs7625233	16865845	rs9882532	0.934978	rs7625233	C	T	0.0582891	3.68124	0.0002321	-6.83553	8.17e-12	PLCL2	0		0.285	3a	2	15	1	0	0
7	3	16852736	rs7625233	16870340	rs6773869	0.939149	rs7625233	G	A	0.0482911	3.78485	0.0001538	-6.79948	1.05e-11	PLCL2	0		3.607	3a	5	15	1	0	0
7	3	16852736	rs7625233	16875451	rs6804663	0.86773	rs7625233	G	A	0.0826959	3.46214	0.0005359	-6.54449	5.97e-11	PLCL2	0		7.249	5	5	15	1	0	0
7	3	16852736	rs7625233	16875823	rs12489270	0.86773	rs7625233	C	T	0.074589	3.53048	0.0004148	-6.57486	4.87e-11	PLCL2	0		4.66	4	5	15	1	0	0
7	3	16852736	rs7625233	16876255	rs12493035	0.86773	rs7625233	G	A	0.0851805	3.44169	0.0005781	-6.55219	5.67e-11	PLCL2	0		4.998	7	5	15	1	0	0
7	3	16852736	rs7625233	16876476	rs1449538	0.86773	rs7625233	C	T	0.0847467	3.44526	0.0005705	-6.557	5.49e-11	PLCL2	0		5.061	6	5	15	1	0	0
8	3	49200137	rs1134043	49200137	rs1134043	1	rs73073015	T	G	0.0287525	4.02424	5.716e-05	5.13443	2.83e-07	CCDC71	0	UTR3	8.722		4	4	1	1	1
8	3	49200137	rs1134043	49342417	rs112274965	0.620132	rs73073015	A	G	0.0986315	3.33999	0.0008378	6.80086	1.04e-11	USP4	0	intronic	1.442	6	4	4	1	1	1
8	3	49503166	rs73073015	49342417	rs112274965	0.848584	rs73073015	A	G	0.0986315	3.33999	0.0008378	6.80086	1.04e-11	USP4	0	intronic	1.442	6	4	4	1	1	1
8	3	49200137	rs1134043	49343601	rs9844757	0.620132	rs73073015	G	T	0.0983143	3.34226	0.000831	6.68058	2.38e-11	USP4	0	intronic	0.737	6	4	4	1	1	1
8	3	49503166	rs73073015	49343601	rs9844757	0.848584	rs73073015	G	T	0.0983143	3.34226	0.000831	6.68058	2.38e-11	USP4	0	intronic	0.737	6	4	4	1	1	1
8	3	49503166	rs73073015	48604059	rs41290686	0.699242	rs73073015	A	G	0.0997669	3.33188	0.0008626	6.14793	7.85e-10	COL7A1	0	intronic	3.662	5	3	15	1	1	1
8	3	49503166	rs73073015	48688114	rs73078349	0.665427	rs73073015	A	G	0.097462	3.34833	0.000813	6.41266	1.43e-10	CELSR3	0	intronic	8.499	5	4	15	1	1	1
8	3	49503166	rs73073015	48725707	rs1048940	0.83085	rs73073015	T	C	0.0436019	3.83689	0.0001246	6.07759	1.22e-09	IP6K2	0	exonic	19.23		4	4	1	1	1
8	3	49503166	rs73073015	48737847	rs73080312	0.83085	rs73073015	T	C	0.0431641	3.84187	0.0001221	6.11559	9.62e-10	IP6K2	0	intronic	2.551	7	2	4	1	1	1
8	3	49503166	rs73073015	48832146	rs73080361	0.897964	rs73073015	A	G	0.0582662	3.68146	0.0002319	6.43435	1.24e-10	PRKAR2A	0	intronic	3.735	7	5	5	1	1	1
8	3	49503166	rs73073015	48885212	rs55761431	0.907876	rs73073015	A	G	0.0593529	3.671	0.0002416	6.44448	1.16e-10	PRKAR2A:PRKAR2A-AS1	0:0	ncRNA_exonic	17.7	4	1	1	1	1	1
8	3	49503166	rs73073015	48887027	rs11709092	0.907876	rs73073015	C	A	0.0590327	3.67409	0.0002387	6.32212	2.58e-10	PRKAR2A-AS1	0	ncRNA_exonic	9.607	6	5	5	1	1	1
8	3	49503166	rs73073015	49071450	rs113519699	0.897338	rs73073015	C	A	0.0509657	3.75607	0.0001726	5.74578	9.15e-09	QRICH1	0	intronic	1.963	6	4	4	1	1	1
8	3	49503166	rs73073015	49072228	rs56004653	0.908092	rs73073015	C	T	0.050518	3.7609	0.0001693	6.37248	1.86e-10	QRICH1	0	intronic	5.758	5	4	4	1	1	1
8	3	49503166	rs73073015	49113729	rs73082362	0.907876	rs73073015	T	C	0.0424993	3.84942	0.0001184	6.40742	1.48e-10	QRICH1	0	intronic	0.431	5	4	4	1	1	1
8	3	49503166	rs73073015	49189316	rs55921200	0.92809	rs73073015	C	T	0.0403652	3.87414	0.000107	6.44317	1.17e-10	RP11-694I15.7	0	ncRNA_intronic	6.36	5	5	15	0	1	1
8	3	49503166	rs73073015	49252583	rs112890859	0.917967	rs73073015	G	A	0.0540234	3.7245	0.0001957	6.71198	1.92e-11	CCDC36	0	intronic	4.668	7	4	15	1	1	0
8	3	49503166	rs73073015	49406095	rs11716445	0.979671	rs73073015	A	G	0.0428432	3.84551	0.0001203	6.64706	2.99e-11	RHOA	0	intronic	6.996	6	4	4	1	1	1
8	3	49503166	rs73073015	49503166	rs73073015	1	rs73073015	A	G	0.0214587	4.13777	3.507e-05	7.2509	4.14e-13	RNA5SP130	1381	intergenic	10.37	4	1	7	1	1	1
8	3	49503166	rs73073015	49534439	rs113176147	0.979322	rs73073015	T	G	0.043997	3.8324	0.0001269	7.05229	1.76e-12	DAG1	0	intronic	0.287	6	4	5	1	1	1
8	3	49503166	rs73073015	49651534	rs11710905	0.869188	rs73073015	T	C	0.0908455	3.39772	0.0006795	7.37207	1.68e-13	BSN	0	intronic	1.23	6	5	15	1	1	0
8	3	49503166	rs73073015	49732699	rs55662945	0.938262	rs73073015	T	C	0.0730634	3.54374	0.0003945	7.14168	9.22e-13	RNF123	0	intronic	2.198	6	2	5	1	1	1
8	3	49503166	rs73073015	49813258	rs9853352	0.880964	rs73073015	G	A	0.0896906	3.40659	0.0006578	7.2111	5.55e-13	IP6K1	0	intronic	5.289	1f	4	5	1	1	1
8	3	49503166	rs73073015	49813826	rs112101327	0.880964	rs73073015	C	T	0.0925828	3.38434	0.0007135	7.25388	4.05e-13	IP6K1	0	intronic	3.018	6	4	5	1	1	1
8	3	49503166	rs73073015	49826987	rs73077200	0.979671	rs73073015	T	C	0.0421128	3.8538	0.0001163	6.83748	8.06e-12	CDHR4	1177	intergenic	9.436	5	5	15	1	1	0
8	3	49503166	rs73073015	49861068	rs73079012	0.931732	rs73073015	C	T	0.0705714	3.56555	0.0003631	6.30297	2.92e-10	AC139451.1	4581	intergenic	1.437	6	5	15	1	1	0
8	3	49503166	rs73073015	49877585	rs9858428	0.880964	rs73073015	T	G	0.0966689	3.35397	0.0007966	7.15878	8.14e-13	TRAIP	0	intronic	0.151	6	2	5	1	1	0
8	3	49503166	rs73073015	49908338	rs11716961	0.861418	rs73073015	A	G	0.0861085	3.43402	0.0005947	6.75282	1.45e-11	CAMKV	682	upstream	3.778	5	5	13	1	1	1
8	3	49503166	rs73073015	50189531	rs73080977	0.759367	rs73073015	T	G	0.077133	3.50829	0.000451	6.20018	5.64e-10	RP11-493K19.3	0	ncRNA_intronic	5.977	5	2	14	1	1	0
9	3	62462818	rs9874646	62462818	rs9874646	1	rs1452075	C	T	0.0281728	-4.03232	5.523e-05	-5.7809	7.43e-09	CADPS	0	intronic	6.593	7	4	15	1	0	0
9	3	62462818	rs9874646	62471086	rs6774533	0.61885	rs1452075	C	T	0.00147852	-4.87684	1.078e-06	-6.72717	1.73e-11	CADPS	0	intronic	3.58	7	5	15	1	0	0
9	3	62471282	rs9968060	62471086	rs6774533	0.756119	rs1452075	C	T	0.00147852	-4.87684	1.078e-06	-6.72717	1.73e-11	CADPS	0	intronic	3.58	7	5	15	1	0	0
9	3	62481063	rs1452075	62471086	rs6774533	0.785076	rs1452075	C	T	0.00147852	-4.87684	1.078e-06	-6.72717	1.73e-11	CADPS	0	intronic	3.58	7	5	15	1	0	0
9	3	62471282	rs9968060	62471009	rs1452074	0.739994	rs1452075	C	T	0.0960136	-3.35863	0.0007833	-5.86468	4.5e-09	CADPS	0	intronic	1.214	7	5	15	1	0	0
9	3	62471282	rs9968060	62471282	rs9968060	1	rs1452075	C	T	0.0185048	-4.19102	2.777e-05	-5.80362	6.49e-09	CADPS	0	intronic	2.394	7	5	15	1	0	0
[truncated: 1,375 more rows]

## Sheet: Table S7
Table S7. Genes implicated by positional, eQTL, or chromatin interaction mapping of candidate SNPs within loci shared between ASD and INT at conjFDR<0.05
[truncated: 106 more rows]

[truncated: 8 more sheets: Table S8, Table S9, Table S10, Table S11, Table S12, Table S13, Table S14, Table S15]
